# Supplementary material for: Maize (Zea mays L.) Genome Diversity as Revealed by RNA-Sequencing
Source: PLoS One. 2012 Mar 16;7(3):e33071. doi: 10.1371/journal.pone.0033071 (PMC3306378; doi:10.1371/journal.pone.0033071)
Supplement: Table S3 — Primers used for confirmation of the RNA-seq de novo assembly and expected transcript presence/absence variation. Representative transcripts were selected for confirmation based on the predicted expression across 8 of the lines to represent transcripts with expression in 1, 4, or 8 of the lines. (XLSX) [file pone.0033071.s008.xlsx]

## Sheet: Sheet1
Table S3. Primers used for confirmation of the RNA-seq de novo assembly and expected transcript presence/absence variation. Representative transcripts were selected for confirmation based on the predicted expression across 8 of the lines to represent transcripts with expression in 1, 4, or 8 of the lines.
Transcript	Predicted Inbred Lines with Expression	Observed Inbred Lines with Expression	5' Primer	3' Primer	Expected Fragment Size
Locus_115530_transcript_1	CML103	B97, CML103, H99	TCCATAGACACAGCCATACAGG	ATTCTTCGTACTGGGACTGCAT	510
Locus_119939_transcript_1	H99	H99, B37	CTCATTTCCCCTATCCTTAGCC	AGCGAGGAGTAGAGAACAGTCG	472
Locus_45639_transcript_1	CML103	B37, B73, B97, CML103, CML322, H99	CTCAAGCTTGGCTACCATTCTC	TGAGTGCTTCTGCCACAAATAG	506
Locus_65456_transcript_2	CML322	Failed	ATCCCACTCTCCATATCACACC	GATATCTGGGCTTACCAGTTCG	538
Locus_29683_transcript_1	B37, B97, CML322, H99	B14A, B37, B97, CML322, H99	GCTCGGATCTCCTATTTTTATGC	ATCTAAAGCACCCATTCATCGT	505
Locus_45344_transcript_2	B37, B73, CML322, CML333	Failed	CCACTTCCTGTACGATTTCTCC	GTCCAGACTTACTGTCCGAACC	490
Locus_58660_transcript_1	B97, CML103, CML322, CML333	B97, CML103, CML322, CML333	ACCAAAATGATTCGTAGCTGGT	AGCACCGACATACAAGGAAAGT	525
Locus_74107_transcript_2	B37, CML103, CML322, H99	B14A, B37, CML103, CML322, CML333, H99	CAACTGTCACCATCCACTCTGT	GAAGCAAAATGTTCAAGCACTG	472
Locus_10072_transcript_1	B14A, B37, B73, B97, CML103, CML322, CML333, H99	Failed	ACATGTTCTGGTGGCTGTACC	CACGTACGAGACCGTGAAATC	518
Locus_1017_transcript_1	B14A, B37, B73, B97, CML103, CML322, CML333, H99	B14A, B37, B73, B97, CML103, CML322, CML333, H99	GACCCCACCACAATTGTCTACT	GAACTGGGGTGCTGAAGATTAG	514
Locus_10205_transcript_1	B14A, B37, B73, B97, CML103, CML322, CML333, H99	B14A, B37, B73, B97, CML103, CML322, CML333, H99	GTCGTCAACGTAGTCCATCTTG	GAGGAACGCTCCAATAATATGC	485
Locus_10849_transcript_1	B14A, B37, B73, B97, CML103, CML322, CML333, H99	Failed	GGATAAGAGAGGGGTGAGGTTT	GTTTCCGTCCAAACTGTTCTTC	527
Locus_43807_transcript_1	H99	Failed	CTGGGGTCACATAATTTCCAAC	CCCGGAAGTGACATACGAAC	512
Locus_5359_transcript_2	CML322	Failed	CCTATCTCGAAAGAACCTCCAA	GTTTTGGGTTGAGCTAGTGACC	472
Locus_85304_transcript_1	B37	B37, CML103, CML322	GGTCAGCTAGGTGGACTGTTCT	CATTCAAGCAGAAACAAACAGG	472
Locus_82499_transcript_2	B37, B73, B97, H99	B37, B73, B97, H99	ATTGCTGCATGTCAATTGGTAG	TCTTGTATTGGATGACGTCTGG	455
Locus_82507_transcript_1	B37, CML103, CML322, CML333	B37, B97, CML103, CML322, CML333, H99	GTAACGACATGGTCCCAAAAAT	TTGTTAGGTGCAGTAAGCATGG	516
Locus_89781_transcript_1	B97, CML103, CML322, H99	B97, CML103, CML322, H99	ACGAGATATCACCACCAGGACT	ATGTCAACCGCTTTCTGAATTT	496
Locus_1028_transcript_1	B14A, B37, B73, B97, CML103, CML322, CML333, H99	Failed	TGACCAGAAGTTCAGAGGTCAG	GGAGGATGAGGAGGAGATAACC	503
Locus_10315_transcript_2	B14A, B37, B73, B97, CML103, CML322, CML333, H99	B14A, B37, B73, B97, CML103, CML322, CML333, H99	CAGCGTCTCAACATAAACCAAG	CGGTTGGGATCTTTTATACTGC	523
Locus_10596_transcript_1	B14A, B37, B73, B97, CML103, CML322, CML333, H99	B14A, B37, B73, B97, CML103, CML322, CML333, H99	GCCACCAACTATTCTCATAGCC	CTTGGTGCAAGAGGGTATTTTC	491
