# Supplementary material for: Maize (Zea mays L.) Genome Diversity as Revealed by RNA-Sequencing
Source: PLoS One. 2012 Mar 16;7(3):e33071. doi: 10.1371/journal.pone.0033071 (PMC3306378; doi:10.1371/journal.pone.0033071)
Supplement: Table S5 — Fragments per kilobase of exon model per million fragments mapped (FPKM) for seedling tissue from 21 diverse maize inbred lines. Reads were mapped to the 5b pseudomolecules (http://ftp.maizesequence.org/) using Bowtie version 0.12.7 [50] and TopHat version 1.2.0 [51] and fragments per kilobase of exon model per million fragments mapped (FPKM) were determined using Cufflinks version 0.9.3 [56] and the 5b annotation (http://ftp.maizesequence.org/). (XLSX) [file pone.0033071.s010.xlsx]

## Sheet: 21_diverse_cat_FPKM.txt
Table S5. Fragments per kilobase of exon model per million fragments mapped (FPKM) for seedling tissue from 21 diverse maize inbred lines. Reads were mapped to the 5b pseudomolecules (http://ftp.maizesequence.org/) using Bowtie version 0.12.7 [50] and TopHat version 1.2.0 [51] and fragments per kilobase of exon model per million fragments mapped (FPKM) were determined using Cufflinks version 0.9.…
Gene	Chromosome	Start	Stop	B14A	B37	B73	B97	CML103	CML322	CML333	H99	M37W	Mo17	MoG	MS71	NC350	NC358	Oh43	Oh7B	PHG47	PHN11	PHW65	W605S	W64A
AC205376.4_FG003	chr4	79585998	79587272	14.7547	36.3169	13.7447	27.1906	0	8.14916	0	15.7067	19.4849	0	23.6569	0	0	22.4307	27.1938	12.343	20.9871	0	21.1336	0	13.0972
GRMZM2G024563	chr4	23625402	23640493	78.1309	72.0838	71.8866	62.3593	55.1721	67.6831	67.3694	71.9978	75.0432	77.2021	104.748	41.0953	46.6167	61.3932	58.1356	63.7531	77.6798	49.9964	74.8109	81.8903	67.9814
GRMZM5G809265	chr1	235569461	235580082	49.5569	40.5954	79.1043	37.9205	34.187	51.6103	49.9242	34.8467	39.5297	50.5358	55.3631	64.2142	45.4832	51.8818	51.7885	36.7757	42.514	61.0793	55.825	52.9594	48.2713
GRMZM2G125201	chr1	97768539	97769302	0	0	0	0	0	0	0	0	0	0	0	0	0	0	0	0	0	0	0	0	0
GRMZM2G005155	chr2	10365628	10368580	11.0327	1.91731	27.0952	3.25412	3.23675	7.24992	0	0	6.92962	0	15.0116	3.36354	0	3.97132	1.45265	10.4847	2.5314	0	2.04628	4.49823	1.92884
GRMZM2G111923	chr4	146002502	146007996	40.0637	44.6906	33.8334	38.9072	37.0796	53.5612	55.7332	47.4234	37.6433	60.555	66.1902	49.2707	33.6956	37.6185	46.2499	43.4564	45.8416	34.2556	54.1609	38.4123	49.0975
GRMZM2G163956	chr3	31475941	31477436	11.2839	10.1184	9.47169	8.66216	3.23741	4.68897	0	10.0657	21.8745	10.8964	14.7952	21.3206	7.51005	6.38202	4.26037	9.58404	10.9141	3.95562	19.9689	23.4845	9.36883
GRMZM2G332423	chr10	90435096	90436191	2.34217	3.10211	5.83688	5.30378	3.89446	3.51956	4.63396	6.32667	3.15837	5.07495	5.14421	15.0091	0	6.67022	3.04427	11.2866	2.83989	10.4389	18.5603	6.52241	3.0416
GRMZM2G305390	chr7	4934781	4935192	0	0	0	0	0	0	0	0	0	0	0	0	0	0	0	0	0	0	0	0	0
GRMZM2G700981	chr6	84456409	84456737	151.907	80.4914	112.52	94.4578	41.73	64.5318	182.184	66.0904	67.8983	89.8003	149.054	146.334	0	66.4124	39.3823	73.1848	85.3776	50.6834	65.5222	181.719	84.2312
GRMZM2G040600	chr7	169339816	169345437	46.2622	55.5203	43.8445	42.2077	31.8888	54.6096	65.645	52.8733	40.6863	46.1196	40.804	51.1115	24.5396	52.5754	44.6817	40.1653	36.669	43.1463	33.6408	59.4977	56.3437
GRMZM2G065652	chr4	203428326	203428688	0	0	0	53.2872	0	0	0	0.842369	0	29.41	61.3255	0	0	10.5682	0.11688	0	0	0	0	21.3569	0
GRMZM2G382029	chr8	8495394	8496885	0	0	0	0	0	0	0	0	0	0	0	0	0	0	0	0	0	0	0	0	0
GRMZM2G373322	chr2	137772338	137774535	20.8286	18.5182	12.807	23.2876	8.76371	28.6899	34.6331	29.5502	23.7389	18.5895	22.5194	36.7426	27.0339	25.0504	21.4038	34.4941	15.5806	21.4802	22.8126	29.8014	20.8058
GRMZM2G161411	chr5	15320901	15322507	6.63045	0	0	0	0	0	0	0	0	0	0	0	0	0	0	0	6.29464	0	5.64943	0	2.55133
GRMZM2G140016	chr4	115429772	115432652	61.6097	45.7746	52.5741	59.5529	53.8774	53.2671	48.4476	18.7153	44.2609	45.5936	63.0155	52.9611	42.8064	45.9539	40.7699	57.3914	52.3688	46.8431	50.6523	56.9817	71.2653
GRMZM2G048962	chr6	117998643	118000829	11.3485	15.7765	14.3265	17.24	0	8.05266	10.1227	6.82257	9.48543	5.87937	7.37212	32.2798	0	4.88272	17.1359	0	17.7571	24.864	25.6613	14.0457	25.4277
GRMZM2G028366	chr5	155030182	155038462	0	0	0	0	0	0	0	0	0	0	0	0	0	0	0	0	0	0	0	0	0
GRMZM2G004888	chr6	160015856	160022472	7.18228	8.48171	9.83131	8.82955	7.58183	11.9591	9.92561	13.0728	12.3381	6.53079	4.71028	4.56577	11.4088	6.92427	8.95933	18.3486	5.05434	8.31676	7.63276	9.20789	6.91189
AC217311.3_FG001	chr1	74280689	74282117	0	0	0	0	0	0	0	0	0	0	0	0	0	0	0	0	0	0	0	0	0
GRMZM5G889338	chr2	44471646	44472033	0	0	0	0	0	0	0	0	0	0	0	0	0	0	0	0	0	0	0	0	0
GRMZM2G453919	chr7	61530755	61532826	0	0	0	3.99563	0	8.56285	0	0	0	0	0	0	0	0	3.74236	20.3203	0	0	0	0	0
GRMZM2G109821	chr6	36088948	36102904	298.372	192.85	233.255	149.494	115.523	261.762	292.251	152.825	170.174	237.977	219.01	198.806	183.763	251.239	160.42	167.798	312.487	175.339	183.226	177.691	247.063
GRMZM2G519811	chr6	94414451	94415128	0	0	0	0	0	0	0	0	0	0	0	0	0	0	0	0	0	0	0	0	0
GRMZM2G488458	chr7	149718912	149725650	111.173	134.311	82.994	121.454	112.507	134.15	158.93	159.655	134.822	98.3943	142.438	103.387	131.81	141.757	112.469	86.0215	102.982	94.2295	118.142	125.076	138.999
GRMZM2G119782	chr5	213336712	213337573	386.322	642.594	1611.59	665.557	586.44	725.789	441.353	606.559	557.34	1353.19	304.34	361.864	653.035	588.324	592.376	1214.25	441.516	1338.74	636.725	428.731	762.912
GRMZM2G117633	chr10	117027752	117060463	56.0273	67.3455	59.9768	62.751	77.3568	75.1358	61.5014	68.8335	78.8915	75.3376	77.6232	44.3882	61.3144	85.3435	63.7741	75.2533	60.8253	71.9423	83.8078	49.3376	86.5539
GRMZM2G091487	chr5	5636845	5638678	23.7138	66.4225	22.9392	90.2202	29.9208	30.0237	31.4028	56.3513	46.2287	58.6463	33.9712	49.91	24.1517	58.4494	33.1738	24.596	68.9196	40.9826	54.2944	34.3204	60.2983
GRMZM2G151873	chr1	292409912	292417113	195.094	159.698	134.767	158.315	203.668	120.79	101.19	143.634	135.928	197.135	141.542	152.175	143.575	124.79	167.059	126.847	148.681	167.637	204.831	152.76	239.906
GRMZM2G038365	chr4	226266754	226268798	2965.5	3047.97	1156	1810.59	1863.2	766.752	2436.21	1938.67	1747.51	1854.51	2722.16	775.048	1952.56	2302.08	2046.99	2218.72	2190.3	1028.75	1501.74	2181.83	3073.78
GRMZM5G819212	chr4	824379	826918	91.8947	137.53	89.265	92.0816	71.4417	87.4395	135.433	95.4232	79.9459	72.2513	52.2652	73.7234	77.884	55.1789	68.9014	117.299	100.625	59.6232	124.45	85.2642	119.42
GRMZM2G063156	chr3	40445971	40446881	112.427	65.1867	81.7807	53.7568	19.0969	57.2058	106.408	80.1079	38.7002	54.7393	54.2932	78.7883	16.4391	69.5319	52.9173	58.2291	43.3772	45.2805	55.7872	58.5453	58.7629
GRMZM2G169261	chr10	19072240	19073919	55.2516	40.5186	46.9643	117.193	212.263	69.7238	79.865	69.6424	14.7758	110.566	71.0384	147.093	152.242	60.8926	152.029	126.726	171.807	252.58	136.556	37.4043	118.803
GRMZM2G054023	chr5	135878922	135881088	0	0	8.79664	10.4266	0	5.55589	4.36836	6.63283	9.36705	14.371	9.8241	0	9.42142	0	0	0	12.1016	0	9.12977	7.33838	1.34296
GRMZM2G174797	chr4	185728024	185732397	65.6084	81.1749	71.028	91.0621	82.1302	67.0469	73.9724	60.3784	84.3223	72.3076	93.2309	60.4306	68.7275	79.164	93.271	81.7752	93.093	74.1712	60.4464	50.5467	76.6399
GRMZM5G851347	chr7	166039574	166039781	0	0	0	0	0	0	0	0	0	0	0	0	0	0	0	0	0	0	0	0	0
GRMZM2G056442	chr4	114274305	114282478	2.33745	4.03572	3.55768	3.43346	4.53649	5.94126	5.74649	5.79169	4.71417	1.66092	3.67519	2.6187	6.43087	3.11597	4.14333	4.12471	3.03456	7.25215	2.39275	0	5.24593
AC212809.2_FG002	chr1	89978852	89979404	0	0	0	0	35.7736	10.5623	5.27365	31.732	16.0373	0	0	0	0	4.69968	0	23.7607	0	0	0	0	0
GRMZM2G023760	chr9	14618516	14618993	14.0123	13.7112	11.8596	9.41676	17.7233	12.2442	14.7427	10.2892	7.95839	45.3538	9.06242	15.3584	0	8.79365	9.37624	6.514	10.7515	9.41232	19.7218	20.7648	11.8732
GRMZM2G108273	chr8	110710704	110713118	23.7402	10.6107	22.8843	12.6075	22.73	27.1306	40.1639	17.0719	29.308	10.1563	25.0525	21.1407	43.0747	6.88867	25.4384	17.6463	11.3706	33.8045	15.5071	10.5501	35.3669
GRMZM2G077596	chr1	300422453	300435350	118.864	117.256	104.622	108.99	87.2766	117.105	114.499	93.9873	92.4158	116.399	111.435	118.22	101.237	98.7287	105.566	103.066	76.6647	95.0237	70.1456	102.329	88.2697
GRMZM2G112176	chr2	71086138	71088489	385.041	404.5	262.962	273.34	393.647	363.206	354.393	346.407	355.606	496.042	311.705	271.125	423.962	390.434	402.557	290.843	297.931	262.952	317.399	315.592	356.041
GRMZM2G314386	chr2	14530123	14533959	82.7434	46.6418	71.1044	51.128	51.2162	67.8857	101.335	50.5664	63.0085	88.3077	71.0515	65.0239	49.958	45.734	47.6214	45.1484	74.1356	81.1347	48.0373	58.7962	57.6506
GRMZM5G800429	chr9	33895604	33895851	0	0	0	0	0	0	0	0	0	0	0	0	0	0	0	0	0	0	0	0	0
GRMZM2G060465	chr4	184862675	184863499	0	0	0	0	0	0	0	0	0	0	0	0	0	0	0	0	0	0	0	0	0
GRMZM2G563732	chr6	4685780	4688260	0	0	0	12.8119	0	16.2442	0	12.9261	12.1039	0	0	0	0	0	10.5819	0	0	0	0	0	0
GRMZM2G427635	chr1	163271173	163282420	0	5.73927	5.96312	1.41206	0	0	4.02408	5.35214	0	0	2.36145	0	0	2.24642	3.22982	3.33681	4.28964	0	2.80043	0	2.20931
GRMZM2G133885	chr8	157376725	157384243	104.636	133.963	98.3531	114.488	125.199	80.1067	48.8953	116.323	154.09	87.1091	95.5241	47.9764	146.782	70.7479	58.1649	123.361	107.185	120.716	116.808	78.9415	169.266
GRMZM2G177828	chr5	49897242	49899430	1540.76	1941.48	1910.2	1983.99	1623.61	2053.12	1889.79	2067.18	1528.39	2075.94	2169.43	1839.05	1620.71	2093.89	1436.22	2166.25	1790.68	1637.81	1977.14	1860.51	2450.32
GRMZM2G022293	chr1	207225651	207226551	0	0	0	0	0	0	0	0	0	0	0	0	0	0	0	0	0	0	0	0	0
GRMZM2G151644	chr2	167172967	167173558	0	0	0	0	0	0	0	0	0	0	0	0	0	0	0	0	0	0	0	0	0
GRMZM2G012391	chr4	187355086	187358570	204.962	199.509	201.949	216.31	198.147	184.079	236.114	192.938	212.236	167.4	231.353	144.064	208.877	230.813	198.602	195.952	211.307	241.98	214.668	144.391	164.929
GRMZM2G053315	chr7	147122845	147125069	0	1.84443	4.5112	2.78273	0	0	7.04852	10.521	17.8209	0	13.6659	0	0	0	2.00232	0	0	0	0	0	3.01029
GRMZM2G126239	chr3	214857326	214861719	0	6.49477	0	20.0544	0	0	0	0	4.49711	0	0	0	0	0	0	4.23788	0	9.01161	0	0	2.54036
GRMZM2G337389	chr10	54154926	54166808	0	0.155672	0.0316796	0.0663873	0	0.0661664	0	0.033143	0	0.064427	0	0	0	0	0.0819134	0.0910553	0.106983	0	0.0665441	0	0.0222101
GRMZM2G034575	chr9	146533555	146540061	141.683	154.242	129.713	122.399	132.824	147.963	121.363	122.186	123.535	114.208	124.882	150.696	143.648	124.731	137.864	128.759	134.206	126.113	119.566	143.265	122.425
GRMZM2G440614	chr3	38600150	38605806	97.3507	103.259	92.7788	81.517	100.976	83.6452	83.4523	86.9168	87.0996	91.4682	77.4877	76.2418	90.9786	79.4285	89.668	68.2837	92.2404	81.9633	96.6578	87.6405	88.2108
GRMZM2G120631	chr1	20699429	20700232	0	0	0	0	0	0	0	0	0	0	0	0	0	0	0	0	0	0	0	0	0
GRMZM2G090300	chr6	155756752	155758941	376.999	237.325	404.302	361.751	382.187	395.478	259.177	260.241	339.928	273.124	212.32	250.632	302.458	202.171	345.161	313.199	304.944	429.409	248.079	273.096	325.676
GRMZM2G002124	chr5	216072504	216074415	10.4701	11.2418	12.3199	6.68561	0	11.2697	15.8126	6.68688	5.28152	15.8815	17.6117	15.7708	10.3871	10.2474	9.13437	15.3617	12.505	13.7966	9.18757	17.2373	22.1739
GRMZM2G037064	chr10	2789477	2792565	52.6421	41.5673	35.7222	33.6464	24.6032	53.6373	23.0261	34.1532	30.973	36.7755	33.3327	31.8837	48.5201	23.7626	30.0687	23.0663	15.5825	28.3768	30.2458	35.6909	22.3323
GRMZM2G124276	chr9	4843223	4845584	36.6373	37.3681	33.9688	33.0601	38.7629	25.0119	29.5229	41.3877	35.0459	31.1984	67.8638	82.2117	49.0934	59.9828	29.7835	83.5366	44.4654	29.7825	112.414	36.0096	34.2685
GRMZM2G125482	chr2	184258074	184260458	54.6454	17.3333	29.5296	15.7581	20.603	94.8841	16.1911	58.7943	25.2853	8.80449	3.91139	54.4217	30.2388	19.5037	38.0237	22.1061	43.4815	12.2118	35.0099	12.8562	9.82831
GRMZM2G046676	chr5	17859741	17863444	50.9921	52.5906	30.9572	40.9821	33.6289	45.6859	47.4954	110.844	49.9973	44.0275	61.2535	28.4397	40.6053	39.7372	46.2551	55.654	85.3777	32.024	73.6713	29.145	48.2243
GRMZM2G375999	chr9	97390455	97393251	0	6.14816	5.09183	5.35015	3.6808	3.84953	0	3.75034	4.49189	5.44018	2.853	0	0	5.07847	5.96417	3.32001	0	3.05994	3.46235	0	5.97943
GRMZM2G014154	chr2	165430752	165433979	256.616	349.375	330.119	303.366	351.618	353.52	216.675	336.242	304.723	279.187	208.544	201.664	267.354	291.513	376.603	307.762	239.889	291.277	376.211	224.101	361.304
GRMZM2G160224	chr1	25616488	25619070	0	0	0	0	0	0	0	0	0	0	0	0	0	0	0	0	0	0	0	0	0
AC207260.3_FG003	chr6	88817372	88817843	0	0	8.79139	10.9146	0	0	0	15.3353	0	0	0	0	0	0	0	16.5955	0	0	0	10.2283	1.28891
GRMZM2G356718	chr1	281763625	281769767	1.89839	5.73031	1.01028	0.982939	3.13404	0.858292	2.13151	1.5002	1.38365	0	7.38452	2.06231	0	0.776546	1.57879	41.0582	1.56957	0.985521	1.09636	0	0.956404
GRMZM2G324727	chr8	113414361	113438862	3.61239	4.16012	2.56557	2.71116	3.32386	3.15361	9.45246	3.76924	5.55429	2.425	2.03469	4.24741	6.82014	2.46472	6.11152	2.1537	2.17008	6.4608	1.92972	3.59149	2.94509
GRMZM5G884722	chr6	14840070	14840612	0	0	0	0	0	0	0	0	0	0	0	0	0	0	0	0	0	0	0	0	0
GRMZM2G039650	chr3	177670901	177684978	46.4186	60.6872	61.2126	77.8715	59.265	72.483	62.5464	66.978	62.0605	74.8289	85.9102	62.3143	63.8608	76.2344	58.8765	57.7777	56.2277	76.8743	69.9883	71.7567	75.6769
GRMZM2G029912	chr9	105190709	105197290	21.9522	36.7252	40.1331	54.8279	33.1365	27.3545	41.2456	56.0325	65.1302	32.1736	31.3741	31.8005	29.0283	25.2489	35.535	28.5242	45.1463	47.7468	35.4377	37.0534	35.1484
GRMZM2G341159	chr8	166560923	166562027	0	5.40665	12.446	8.60741	10.9683	0	0	3.26657	22.1085	0	6.86409	12.3645	25.5563	7.67712	0	11.3183	20.0083	12.5454	0	11.0864	15.4084
GRMZM2G159950	chr5	1077126	1079935	9.18216	10.8165	9.79156	10.3325	8.31922	10.4005	10.3352	10.8774	7.30602	11.7769	8.14118	6.13681	14.3596	7.28199	11.217	8.95331	8.92168	10.208	9.93117	11.0827	13.536
GRMZM2G416019	chr1	235710672	235716471	113.314	108.998	99.9956	104.103	97.9928	100.641	77.9949	100.079	100.341	99.3056	85.6596	84.0737	97.4471	95.3191	100.697	100.703	73.9843	85.9232	97.9399	108.315	108.077
GRMZM2G101179	chr10	146336748	146339301	58.6601	34.5097	39.5291	53.7805	34.4895	47.4154	54.7206	56.8185	33.9449	30.7827	54.7701	48.4649	42.0663	40.7629	32.8181	49.056	45.3104	35.8319	38.3963	53.0294	28.773
GRMZM2G120302	chr9	7578399	7585814	95.5135	103.948	88.3368	107.86	87.2418	88.5599	106.855	84.9544	80.6883	109.723	119.804	90.4713	50.0876	101.068	74.0455	88.283	86.446	94.9994	80.6689	89.6504	132.263
GRMZM2G327703	chr2	214671519	214672474	0	0	0	0	0	0	0	0	0	0	0	0	0	0	0	0	0	0	0	0	0
GRMZM2G113473	chr9	147359787	147361113	24.4127	41.2046	26.7033	33.7294	13.8508	31.4169	12.3662	20.0038	51.9614	25.5048	39.5574	26.1959	28.4592	33.8437	41.9635	19.438	30.247	15.7949	17.7113	39.2292	17.6646
GRMZM2G323936	chr3	134015050	134017773	16.1797	21.1488	21.3628	22.8579	23.0121	21.2826	13.1408	27.9249	23.9678	20.75	16.5527	19.9289	17.3733	21.1228	26.129	18.7555	19.5217	15.7259	22.0202	20.4028	18.5858
GRMZM2G014034	chr2	38607475	38608090	0	0	0	0	0	0	0	0	0	3.53916	0	0	0	0	0	0	0	0	0	0	0
GRMZM2G086530	chr10	135634113	135634876	0	0	0	0	0	0	0	0	0	0	0	0	0	0	0	0	0	0	0	0	0
GRMZM5G889776	chr9	135877139	135877340	146.857	149.347	131.267	13.9705	0	0	0	15.472	0	19.8897	247.025	0	0	160.538	127.665	16.2255	32.1714	26.2319	13.3507	8.98047	12.6736
GRMZM2G040079	chr7	139350783	139359026	64.8678	68.5375	61.2714	83.8524	58.0461	67.8928	73.1502	85.2992	66.0834	65.6316	68.1959	64.9169	66.9069	74.8142	69.0354	76.1628	79.9293	65.8645	60.5638	72.2991	70.578
AC198357.3_FG002	chr7	85342626	85343638	0	0	0	0	0	0	0	0	0	0	0	0	0	0	0	0	0	0	0	0	0
GRMZM2G031568	chr3	67690881	67696291	199.144	132.817	201.076	180.652	183.466	173.381	152.592	80.2341	204.167	131.47	266.892	116.105	124.993	252.546	114.321	216.129	223.642	177.956	198.381	110.526	118.34
GRMZM2G048616	chr1	182391231	182393687	28.6035	66.1327	126.166	43.2399	95.6371	37.9952	41.6326	37.1155	66.5069	85.5255	60.1505	107.496	95.3415	59.8227	57.7722	167.938	40.2763	135.249	40.9628	77.1412	55.0847
GRMZM2G090122	chr2	80292410	80293422	66.4241	43.9506	49.5082	27.8865	36.878	46.3876	42.6784	22.8986	40.9898	39.3391	52.7226	15.4661	37.7737	37.6426	42.6305	44.8959	15.8239	22.3187	41.58	0	43.8897
GRMZM2G018806	chr3	25222479	25223219	0	8.53934	14.9047	10.1348	0	0	0	0	0	14.1355	0	0	0	0	7.76615	11.1089	11.0577	0	11.599	0	13.7818
GRMZM2G084762	chr3	135439980	135443437	28.3959	23.6563	31.786	18.9724	27.465	21.0895	15.744	34.6478	21.0398	8.21724	7.71152	14.532	20.9532	13.9541	22.2174	37.596	13.0164	15.8681	24.6097	8.95228	16.3936
GRMZM2G141244	chr1	288012762	288015140	0	0	0	0	0	0	0	0	0	0	0	0	0	0	0	0	0	0	0	0	0
GRMZM2G100492	chr4	44123230	44124122	0	0	0	0	0	0	0	0	0	0	0	0	0	0	0	0	0	0	0	0	0
GRMZM2G026015	chr8	16916335	16918485	9496.74	8204.39	8696.53	7419.69	10528.3	9130.24	13770.5	8327.68	9819.77	8488.54	11892.8	6060.09	6097.2	14022.8	9437.31	5672.89	8964.65	5754.93	12828	8529.68	8696.21
GRMZM2G084014	chr7	132589995	132595367	10.8505	8.60746	10.7921	16.7801	21.839	14.5119	20.8746	12.4425	17.9477	15.8611	14.8768	15.0114	22.737	16.2128	13.129	8.60535	13.8414	13.0313	11.5689	12.0786	10.335
GRMZM2G101689	chr1	60861637	60865926	64.0417	49.2107	68.6346	80.0999	72.422	73.152	64.4656	55.8728	59.0201	58.8009	56.794	69.493	67.777	60.9893	83.2214	36.8334	69.368	78.0645	75.5758	42.5666	72.6803
GRMZM2G457287	chr4	1992636	1995216	5.96022	4.55622	9.9778	4.71679	5.72872	17.9259	0	4.41313	16.8485	20.5064	0	20.2608	9.36197	0	0	0	0	11.2459	12.6199	11.1371	0
GRMZM2G065596	chr6	51439464	51442785	4.8413	11.9369	4.05788	3.695	2.84685	5.47866	27.055	4.13455	4.52936	5.22711	1.8639	0	3.35182	3.21667	3.39546	6.42508	2.57878	5.21129	7.05091	5.02908	7.44477
GRMZM2G147443	chr2	148868257	148868925	0	0	0	5.07413	0	0	0	3.83845	0	0	0	0	0	3.84016	4.26393	0	0	0	0	0	3.39383
GRMZM2G098527	chr4	199935910	199937919	106.256	113.351	111.191	65.5913	49.3828	97.3078	93.4536	96.1972	81.3282	52.7775	112.287	66.8189	86.7135	80.8241	82.9049	37.2745	104.065	94.3341	56.1608	59.8485	55.5651
AC203571.3_FG001	chr9	113603799	113604702	16.0213	11.4958	9.22008	14.2439	0	8.76671	17.2039	10.0663	13.1322	16.9624	19.3719	17.0846	0	11.8993	19.9574	9.09088	24.9915	17.7842	19.6185	20.4004	14.0042
GRMZM2G175480	chr8	92199624	92200983	0	0	0	0	0	0	0	0	0	0	0	0	0	0	0	0	0	0	0	0	0
GRMZM5G834313	chr9	32061040	32065215	6.32975	0.975619	0.825559	1.0507	0	1.23832	2.26103	1.71987	0	0	5.5788	3.3094	0	2.08098	0	0	1.40049	0	0	0	0.819171
GRMZM2G057247	chr7	162068682	162075079	56.9978	43.2357	67.6535	48.1723	48.4971	40.3376	53.6225	34.4796	58.0442	54.8998	41.9705	49.6194	58.5971	48.4415	45.9885	31.8212	34.8292	62	53.4378	59.844	48.3328
GRMZM2G099305	chr1	279897256	279900155	115.598	78.2474	36.8543	53.7787	142.529	35.2818	149.551	81.7875	69.8265	43.2782	54.7044	67.3441	84.1346	46.1838	98.9192	64.5037	114.941	85.3371	87.2472	61.9024	17.1679
GRMZM2G016066	chr2	169557300	169558384	10679.7	9085.71	8998.21	8882.43	9107.2	9904.94	10854.2	7471.91	8270.01	5577.71	11277.4	5018.01	9267.33	11080.2	7368.04	8134.09	7868.86	6980.6	11726.3	6325.23	8990.31
GRMZM2G040481	chr5	176108787	176110125	5.7117	3.33367	5.4357	6.52474	0	0	0	0	0	0	7.70592	0	0	14.1602	0	8.47542	4.13216	7.76348	4.37235	0	2.61272
GRMZM2G086906	chr9	10319529	10320398	1584.67	1558.6	1953.92	1721.2	1355.77	1611.7	1314.92	1895.81	1485.79	1446.42	1282.43	1129.07	1639.85	1172.57	1456.76	1414.96	1336.86	1325.63	1211.85	1208.27	1474.55
AC196008.1_FG001	chr5	207902422	207904075	0	0	0	0	0	2.25385	0	0	0	0	0	0	0	0	0	5.18031	0	0	0	0	1.32566
GRMZM2G170455	chr7	164744316	164745444	0	0	0	6.7112	0	0	0	3.71957	0	0	0	0	0	0	0	0	0	0	0	0	2.32061
GRMZM2G077131	chr1	254981552	254984621	77.3386	83.4721	88.7653	99.3971	99.1546	97.0658	85.6164	93.982	75.7062	62.256	170.863	117.174	90.0482	83.7009	87.0034	87.1058	95.7646	68.2257	103.176	70.2393	99.2278
GRMZM2G368411	chr3	170899666	170902464	15.027	6.36994	7.17058	7.23905	6.81605	10.2909	15.2121	7.98558	6.66201	18.7083	13.0886	12.2148	14.0036	11.6797	3.62218	12.8054	15.4854	5.82389	15.4745	10.2432	5.36901
GRMZM2G052377	chr3	13205216	13206404	0	3.55491	0	0	0	0	0	0	0	0	0	0	0	0	0	0	0	0	0	0	0
GRMZM2G142207	chr3	210357434	210360168	65.1154	17.9896	24.0632	15.7441	14.004	29.9377	14.9076	19.86	19.4528	19.6463	21.2822	23.7169	27.0696	11.6323	43.1036	39.4178	24.3269	36.5815	24.4413	12.7665	32.5391
GRMZM5G814465	chr8	85691640	85692399	10.2615	10.7224	12.5384	9.7156	0	0	0	8.64767	0	0	0	0	0	0	0	0	0	17.6992	6.5141	0	12.0866
GRMZM2G469873	chr4	113063854	113066335	8.10101	8.07627	11.1483	7.42975	11.8985	9.69737	9.1544	15.4836	8.9679	14.1164	6.89546	11.8863	12.7473	11.6126	6.45819	12.1314	8.84283	9.87239	14.8839	13.3665	13.4116
GRMZM2G131026	chr7	173486417	173490475	143.419	94.716	113.282	99.3591	63.0038	93.0883	100.534	86.278	80.6834	89.1783	79.125	53.6653	99.4643	103.336	76.353	82.1927	64.2736	79.815	69.7656	95.9221	71.6691
GRMZM2G102657	chr9	132544648	132547107	2.07983	2.73444	3.62315	1.75709	1.95102	3.0042	3.27601	2.18114	2.10549	0.267489	5.10408	1.32074	0	1.53102	15.7597	1.35607	2.15201	1.13449	5.02553	4.44625	2.59723
GRMZM2G072041	chr1	30887008	30890663	164.162	122.141	140.016	162.702	132.575	101.92	179.479	130.951	163.24	140.281	228.367	148.271	178.159	197.139	184.383	93.7735	174.159	144.82	158.169	196.418	141.411
GRMZM2G340282	chr5	62300505	62307176	0	3.32473	2.7966	7.92898	4.1827	6.22653	0	5.94126	4.75909	0	9.58991	0	0	6.75368	7.41501	8.69865	6.95023	8.57741	6.77496	0	7.18816
GRMZM2G097628	chr10	140186580	140187542	0	0	0	0	0	0	0	0	0	0	0	0	0	0	0	0	0	0	0	0	0
GRMZM2G174343	chr8	13436884	13439926	0	0	4.85243	3.79303	0	0	0	7.61844	4.60864	0	0	0	0	0	2.39448	0	0	0	4.73874	0	0
GRMZM2G064328	chr4	233852127	233856567	48.2794	46.2343	51.9501	52.739	47.777	45.9837	57.2348	53.6826	58.1493	54.8778	52.2954	57.6728	49.3228	43.0591	42.094	53.158	47.4223	39.6659	59.6252	55.8118	64.7921
GRMZM2G087413	chr3	138623891	138624577	0	0	0	0	0	0	0	0	0	0	0	0	0	0	0	0	0	0	0	0	0
GRMZM2G057514	chr9	152063746	152065770	6.9	4.57256	6.14014	22.0628	17.9933	11.0835	4.61236	5.86535	11.1396	24.0186	22.2275	6.75156	18.9958	4.51186	4.59927	1.94127	1.77395	17.5829	2.71719	3.60636	15.4324
GRMZM2G156069	chr3	218176323	218184390	151.338	138.419	95.3593	147.343	117.8	162.439	183.047	135.668	116.86	137.152	187.357	126.798	107.214	165.627	103.403	133.731	130.199	125.682	128.89	124.784	127.413
GRMZM2G445854	chr4	5955514	5960125	0	0	0	2.10559	0	14.4967	0	0	43.0869	0	5.63364	0	5.92174	0	1.80503	0	3.35277	0	0	0	2.83345
GRMZM2G166671	chr3	229562484	229571704	0	5.33761	4.04807	5.95173	0	11.2359	11.439	8.98325	6.01917	13.0145	3.08584	0	6.1977	7.54432	7.62951	0	5.29288	0	4.54078	4.91174	3.02586
GRMZM2G397836	chr1	263204599	263210068	106.024	116.944	108.01	97.4331	72.9736	105.727	85.3781	87.9731	94.314	86.0038	122.815	95.9897	85.1671	85.9828	98.7791	111.737	103.66	86.4357	88.9498	74.9937	114.958
GRMZM2G319573	chr5	77260224	77273432	104.062	150.088	106.228	138.713	145.344	133.961	128.032	129.863	25.1316	23.5761	102.307	18.1246	122.395	22.3828	21.4922	119.446	18.0093	14.1871	18.6919	24.6247	22.5821
GRMZM5G892094	chr2	196298843	196302551	0	0	9.61409	0	0	0	0	0	0	0	0	0	0	0	4.38829	0	0	0	0	0	0
GRMZM2G173700	chr8	124457223	124464067	53.9914	53.0102	48.4952	69.3343	46.0743	57.2959	58.5722	68.8922	61.5359	61.5866	51.7057	56.096	64.5409	61.0716	55.1209	76.5457	46.5925	49.5204	58.6395	49.4063	59.9395
GRMZM2G019356	chr9	23145365	23147124	47.9557	53.5425	63.9271	59.083	47.779	51.9801	60.6013	63.7716	58.8174	72.6265	61.7284	29.5946	56.4764	42.7024	52.4503	31.844	39.0904	49.3409	58.3216	44.5004	69.7791
GRMZM2G448710	chr3	206934822	206936267	5.22665	4.54111	3.37044	9.33778	14.213	8.46394	13.2197	10.5751	5.37871	7.02817	0	13.8392	24.3667	8.44075	4.28751	8.35504	8.5686	9.63356	8.51472	0	4.74539
GRMZM2G018062	chr1	78986565	78989272	23.2775	14.2363	14.0803	18.308	12.2817	14.894	22.1043	16.1852	15.0093	19.0965	15.936	20.1447	0	12.3577	12.7719	11.033	13.2273	11.8564	9.25552	20.5773	12.7339
GRMZM2G009653	chr2	3696859	3699130	78.4702	49.5496	69.11	61.7515	84.9892	62.2625	62.4028	66.6907	60.6191	67.5113	101.685	90.1926	50.7969	50.5948	59.7101	44.4393	106.034	36.8214	59.3282	92.2892	52.8359
GRMZM2G178435	chr4	150812096	150817512	0	0	0	1.08309	1.56352	0	0	0	2.73439	0	0	0	0	0	0	0	0	0	0	0	0
GRMZM2G053742	chr1	88317879	88322742	5.58244	8.82922	6.46183	7.9499	5.41	6.11615	6.65807	8.28986	11.1753	9.50048	7.01568	9.91186	5.95436	8.85481	7.757	8.16283	6.08311	6.07621	7.41507	9.24032	7.73416
GRMZM2G164283	chr9	135458246	135459580	8.58209	0	0	0	0	3.05457	0	4.3764	0	0	0	0	0	0	0	0	0	0	2.84426	0	3.86381
GRMZM2G044343	chr8	141927625	141932624	57.6137	74.9515	67.1832	81.8663	56.1253	72.7047	63.447	86.9111	68.4999	49.6472	75.1263	82.2349	62.3205	61.1636	48.8095	62.861	51.4058	62.1587	71.594	58.944	83.7818
GRMZM2G447691	chr2	38138727	38141696	166.236	202.809	408.748	184.308	162.139	268.301	174.819	346.062	379.229	260.786	121.17	208.129	116.028	110.198	95.8786	240.501	212.311	178.035	207.644	90.5757	257.386
GRMZM2G039592	chr1	288853722	288855344	64.938	66.2068	69.3501	100.273	68.0721	105.671	54.8913	90.7538	99.1282	83.423	76.0539	78.4512	60.1739	79.4763	92.2497	69.3074	66.2111	71.9962	86.6537	77.0118	99.1917
GRMZM2G416733	chr6	103491190	103492218	0	0	0	0	0	0	0	0	0	0	0	0	0	0	0	0	0	0	0	0	0
GRMZM2G176662	chr1	289566226	289572628	124.582	141.79	212.313	164.666	117.316	212.763	142.499	188.384	156.418	103.419	137.629	161.812	187.128	136.5	130.984	131.582	126.106	90.8309	159.47	150.354	116.555
GRMZM2G390009	chr6	6700669	6701561	0	0	0	0	0	0	0	0	0	0	0	0	0	0	0.811549	0	0	0	0	0	0
AC187843.3_FG001	chr10	7368377	7370449	0	0	0	0	0	0	0	0	0	0	0	0	0	0	0	0	0	0	0	0	0
GRMZM2G003909	chr1	119412479	119413875	14.954	3.40018	52.6405	22.0037	36.6393	36.8857	0	20.0725	0	9.72146	23.4071	0	54.521	49.4008	17.7882	6.19233	9.38475	0	7.66313	12.3217	7.37869
GRMZM2G109326	chr9	123238777	123241089	190.908	144.346	124.66	137.376	144.58	122.309	113.662	120.725	157.71	84.3744	133.767	121.369	139.244	105.543	148.411	133.722	98.6275	76.1819	129.42	96.994	128.777
GRMZM2G013524	chr5	72220261	72222141	6.17931	12.5994	7.82654	11.5054	10.3395	8.06239	8.17365	10.6268	8.39507	12.6693	5.805	7.07604	36.6384	6.73043	7.86011	5.98101	9.35634	8.96284	12.0996	11.0361	10.8756
GRMZM2G048928	chr2	166337128	166343550	49.397	53.5546	47.3522	57.2383	43.9763	55.1729	46.9304	50.3082	50.6943	47.1375	55.3659	52.1565	54.5072	50.7243	45.568	51.9773	48.1779	48.3563	48.1345	60.6003	53.0939
GRMZM2G052277	chr2	136402961	136407377	8.19902	5.19922	4.94773	6.2969	4.40872	6.43293	0	16.6479	4.15985	0	8.75716	5.62767	6.44724	4.82715	8.22395	5.26396	5.57071	3.94468	4.02043	13.4901	8.20096
GRMZM2G363460	chr8	135456708	135460588	194.593	229.796	297.744	238.965	294.894	261.262	175.225	203.651	205.727	249.333	276.652	229.39	264.53	223.555	307.306	284.198	210.141	301.91	241.678	242.823	242.337
GRMZM2G067080	chr8	84066154	84070657	77.8052	88.8548	88.5113	96.1013	93.3601	96.186	95.9309	111.765	93.1228	76.6816	79.0031	79.025	95.2088	102.118	96.4631	110.797	74.9547	86.4567	84.4069	104.758	77.069
GRMZM2G060116	chr3	155846152	155847295	1.49764	1.89584	2.8121	1.50696	26.1019	1.47522	5.62529	2.33555	3.38865	6.4972	4.21094	3.58517	0	3.97155	4.871	4.1375	2.98745	6.5888	3.02424	3.02521	3.85403
GRMZM2G046267	chr1	290145734	290146996	0	0	0	0	0	0	0	0	0	0	0	0	0	0	0	0	0	0	0	0	4.55317
GRMZM5G862565	chr1	100335532	100348389	19.5457	24.7586	17.9646	34.0686	22.7731	33.3965	24.5836	29.4621	28.4855	22.6452	20.9972	20.3064	28.0528	35.3178	26.3633	33.1625	25.1557	24.9749	30.1889	27.3825	28.6236
GRMZM5G880720	chr3	213552416	213556530	0	0	0	0	0	0	18.8617	0	0	0	0	2.14326	0	19.4121	0	0	0.228879	0	0.3376	0	0
GRMZM2G341698	chr9	107735075	107736356	0	0	0	0	0	0	0	0	0	0	0	0	0	0	0	0	0	0	0	0	0
GRMZM5G800286	chr4	223215753	223217882	9.27016	8.25504	7.07175	8.94667	5.78102	9.59367	11.1757	7.08185	13.1241	0	7.56954	0	0	5.82564	3.99078	5.69293	6.75398	0	5.50322	0	5.86507
GRMZM2G409934	chr5	94965514	94973362	12.293	12.3405	11.1347	16.6523	7.69107	14.2703	9.42419	18.8955	14.2362	8.03083	0	13.4527	12.4263	10.6442	11.1697	13.4979	9.86517	9.406	10.7523	17.8108	14.8597
GRMZM2G045236	chr6	146895130	146899666	45.2977	54.8738	50.4917	55.8357	50.2951	52.9934	49.4268	58.7602	54.8961	57.9455	49.8887	62.7552	48.2242	48.2781	56.2499	54.8881	53.1103	55.068	50.4719	53.1345	61.3248
GRMZM5G802725	chr5	72949638	72952452	0	5.53287	6.90186	5.57078	9.10276	5.00719	9.53126	8.33012	10.4203	6.96407	8.06567	7.08658	0	11.3426	8.88516	6.51603	7.26002	9.31871	7.41619	0	9.96053
GRMZM2G477073	chr3	5009150	5011123	10.0983	6.00135	10.1358	9.9236	8.53771	6.77414	3.93289	6.58666	9.91428	6.30628	9.23222	5.02734	10.2873	7.07698	11.8769	6.69414	5.74932	15.3789	8.58498	6.23781	7.66516
GRMZM2G061704	chr1	155416768	155419461	0	0	0	0	0	0	0	0	0	0	0	0	0	0	1.60148	0	0	0	0	0	0
GRMZM2G173923	chr7	42196213	42229360	92.0748	142.405	77.9641	102.283	69.4654	116.22	128.802	139.696	110.515	91.1561	178.179	113.345	108.409	145.006	76.5223	129.956	127.789	79.5789	124.717	118.551	152.869
GRMZM2G396049	chr10	128247889	128248797	0	0	0	0	0	0	0	0	0	0	0	0	0	0	0	0	0	0	0	0	0
GRMZM2G037823	chr5	170970565	170973058	18.7274	20.7243	13.6268	14.4865	16.8026	23.0218	17.872	23.5564	7.67368	24.4043	18.5038	12.7672	13.0302	22.537	15.7077	14.5365	14.3023	21.9401	26.3227	28.829	20.931
GRMZM2G401026	chr5	8342125	8343449	318.262	334.45	292.777	379.852	378.508	420.646	580.395	208.902	438.209	308.932	501.318	245.766	134.701	305.118	315.694	428.997	402.452	438.56	618.599	341.662	355.81
GRMZM2G471039	chr2	44193629	44195023	0	0.65141	1.39766	0	0	0	0	0	0	0	0	0	0	0	0	0	0	0	0	0	0
GRMZM2G403562	chr2	144629198	144637545	37.2711	39.8119	33.356	39.2813	34.9871	41.3907	37.6138	39.3285	42.924	36.1922	39.8875	32.1094	37.2641	44.3822	36.1634	42.9236	39.5389	36.9816	35.6297	33.5241	39.5828
GRMZM2G037639	chr1	183592280	183593251	0	0	0	0	0	0	0	0	0	0	0	0	0	0	0	0	0	0	0	0	0
GRMZM2G064938	chr2	212648384	212649098	0	0	0	0	0	0	0	0	0	0	0	0	0	0	0	0	0	0	0	0	0
GRMZM2G155849	chr2	222588228	222601339	98.791	92.6886	107.748	122.947	124.019	117.405	102.895	79.6029	122.672	114.173	118.968	94.3843	92.963	108.709	98.3749	123.782	118.152	119.811	130.165	95.0254	133.523
GRMZM2G085827	chr1	2727731	2736340	28.6443	49.8807	41.9064	53.6444	22.9435	42.5455	37.4274	43.8606	38.3748	32.0981	39.1174	23.6824	17.025	51.1188	33.467	37.9543	33.1411	30.2128	46.0674	31.1065	35.3355
GRMZM2G050647	chr10	115924785	115935046	106.829	105.524	111.995	100.143	86.428	106.307	98.2847	91.7854	100.661	97.5923	83.3676	90.3564	108.024	100.06	93.8826	100.865	86.1778	87.5862	103.634	87.0521	95.3126
GRMZM2G043887	chr10	130625337	130628466	13.787	30.4862	23.4168	44.9825	25.8163	43.8733	17.9813	30.3161	33.9177	23.3417	31.7332	10.1984	15.4213	42.8631	29.1011	29.746	20.8385	17.6596	36.1411	20.935	43.2795
GRMZM2G152051	chr6	149902492	149903718	0	4.66421	0	9.09758	0	0	0	0	0	16.095	7.60188	0	0	6.06135	5.40933	7.00195	24.8588	9.28348	8.55733	0	14.5623
GRMZM2G328060	chr5	147980291	147984699	35.9183	49.2109	36.8825	44.659	42.1739	44.8405	33.9547	42.3453	42.3846	40.8713	45.0177	43.7018	34.492	43.7033	42.4132	40.2588	50.2727	40.4761	41.8981	52.8871	56.8812
GRMZM5G894619	chr10	136083486	136086305	11.9845	14.3726	16.5686	14.7414	31.5141	13.9286	8.37015	21.9944	14.0741	6.60274	13.0046	5.31433	15.0394	14.0834	23.7472	8.28596	17.0479	48.653	13.644	0	9.39111
GRMZM2G095628	chr6	116123004	116124669	0	0	0	0	0	0	0	0	0	0	0	0	0	0	0	0	0	0	0	0	0
GRMZM2G331720	chr3	203868677	203870322	84.474	87.2717	83.1503	84.7687	99.5826	4.65551	64.0595	72.6893	13.9151	47.9832	73.2675	45.2518	0	89.503	79.7375	94.5684	55.2923	78.4041	91.8334	46.3733	79.4868
GRMZM2G165836	chr2	38560009	38561386	0	0	0	0	0	0	0	0	0	0	0	0	0	0	0	0	0	0	0	0	0
GRMZM2G173280	chr3	123784085	123786114	0	0	0	2.22377	0	0	0	0	0	0	0	0	0	0	2.53042	0	0	0	0	0	1.7208
GRMZM2G366411	chr6	139909203	139912047	7.59253	11.4515	10.9201	1.21945	5.10574	4.19518	0	2.31983	5.60564	0	5.46034	7.01587	8.13786	7.55035	2.23307	5.12879	14.9327	21.0681	12.17	0	14.8391
GRMZM2G019859	chr9	40772037	40773556	0	0	0	0	0	0	0	0	0	0	0	0	0	0	0	0	0	0	0	0	0
GRMZM5G856071	chr2	235332432	235334687	0	10.0285	5.77277	20.9081	13.7562	13.873	0	0	0	0	0	0	7.99581	7.59951	1.32891	0	0	21.561	0	0	0
GRMZM2G044884	chr2	20393499	20397524	0	2.40454	0	0	0	2.90237	0	0	0	0	0	0	0	0	0	2.26741	0	0	0	0	1.25987
GRMZM2G126261	chr7	172779031	172780863	208.267	180.108	414.342	316.456	604.45	319.167	322.423	272.516	441.327	361.677	331.896	395.424	270.067	391.874	248.794	300.49	317.057	243.539	467.432	358.82	331.9
GRMZM2G341762	chr6	126152258	126153200	0	0	0	0	0	2.77848	0	0	0	0	0	0	0	0	0	0	0	0	0	0	0
AC233880.1_FG005	chr3	1289441	1290365	0	0	0	0	0	0	0	0	0	0	0	0	0	0	0	0	0	0	0	0	0
GRMZM2G178955	chr4	173308074	173313255	30.515	24.6185	24.7094	26.5204	25.2078	25.2592	0	18.9325	8.84461	23.6644	27.5248	31.7224	11.8539	19.953	25.4888	14.6043	25.088	31.2847	12.4757	17.9078	13.9884
GRMZM2G120110	chr2	189720653	189722749	4.27861	10.6767	5.7205	7.90064	11.2522	13.0264	10.2964	14.9471	11.926	4.82851	6.19371	4.6688	10.9578	13.5485	22.6799	6.39975	13.0683	17.1639	10.9852	15.0489	17.2041
GRMZM2G047628	chr1	278440819	278442793	0	0.619923	0	0	0	0	0	0	0	0	0	0	0	0	0	0	0	0	0	0	0
AC217401.3_FG002	chr1	264855609	264864472	165.162	208.281	221.559	225.82	179.028	179.753	169.364	224.459	200.616	206.418	165.674	164.976	220.135	207.035	216.761	211.765	183.653	198.957	211.256	208.066	137.526
GRMZM2G095643	chr9	65199638	65279828	6.01697	9.08939	10.5619	31.3406	19.1745	26.3972	28.0203	48.7748	22.6613	28.8881	33.204	46.5049	3.02851	12.0329	25.6339	29.8188	28.4899	39.2372	9.20652	54.8319	16.6047
GRMZM2G469175	chr7	31557024	31559323	0	0	4.30583	17.9935	29.4301	8.6973	0	2.47039	9.21849	5.10499	3.9827	14.6294	7.24823	10.1638	1.65734	20.0505	3.30446	25.8743	3.3477	0	3.39373
GRMZM2G448883	chr4	180245811	180247211	46.6507	62.1679	79.5183	98.3889	59.7594	46.3937	38.7472	90.802	63.7649	37.5066	56.0979	52.3237	48.612	70.8337	53.9593	71.9878	57.7997	48.2958	81.1192	28.9008	81.6075
GRMZM5G896568	chr8	173339317	173345856	81.8486	69.9757	58.7615	74.2251	45.2912	73.018	87.1066	62.7101	46.507	82.8195	83.7542	92.0931	52.9393	59.8983	64.6244	66.949	73.6138	45.639	53.5124	98.6841	62.3477
AC203754.4_FG007	chr6	151137129	151137897	0	0	0	14.6621	0	0	0	8.76277	0	0	0	0	0	0	3.61247	0	0	0	0	0	0
GRMZM5G862602	chr7	121502714	121520606	0	0	0	0	0	0	0	0	0	0	0	0	0	0	0	0	0	0	0	0	0
GRMZM2G038032	chr6	162882093	162884481	1417.88	1231.02	1400.32	1317.3	968.778	1176.23	974.405	1505.56	1304.13	1059.13	1141.18	959.68	1300.34	1174.21	1024.67	1139.49	967.611	956.488	919.384	1025.09	1215.07
GRMZM2G104456	chr4	234729143	234732312	364.141	353.285	272.996	288.881	252.66	332.635	424.227	295.198	231.108	381.546	321.786	292.745	245.782	319.949	252.299	306.492	354.805	244.38	284.084	393.117	294.448
GRMZM2G471051	chr8	162752045	162752849	28.8572	67.9587	61.9661	17.8655	14.6329	38.2478	46.2339	47.4207	32.2567	23.3691	13.8004	0	0	37.0413	26.0254	42.3437	35.621	27.3758	29.6473	21.3364	55.0297
GRMZM2G472052	chr7	21140574	21151026	50.9728	45.2696	48.994	49.2231	46.7934	49.7594	70.1403	39.9462	46.0866	63.4928	77.8505	36.6118	37.9841	44.1217	65.1414	48.753	69.3856	49.0587	69.9117	49.5096	59.3357
GRMZM2G159369	chr6	126779718	126784379	37.0757	521.733	544.319	529.785	466.704	516.642	328.817	568.584	445.666	418.272	378.327	375.846	576.463	427.748	462.179	546.343	287.337	436.656	430.293	365.266	420.819
GRMZM5G816423	chr3	162600319	162601773	0	0	0	4.37763	0	3.04491	0	0	0	0	0	0	0	0	3.03024	0	0	0	3.50836	0	0
GRMZM2G176063	chr3	126308452	126310838	12.2015	12.6918	13.2191	18.4428	4.93858	9.56472	7.51504	14.7246	17.482	15.4407	10.1067	18.3112	12.4803	16.9059	16.872	11.671	19.5965	17.3439	15.6501	16.8327	11.553
GRMZM2G127050	chr9	151662152	151666909	67.1477	71.6792	69.3827	50.5657	51.7959	66.0087	61.2457	48.1446	58.1996	53.5418	51.5675	63.8318	62.849	65.8711	60.2712	73.1373	45.1202	62.9312	55.3026	39.5427	64.2885
GRMZM2G091176	chr5	179788951	179791679	0	0	0	0	0	0	0	0	0	0	0	0	0	0	1.0218	0	0	0	0	0	0
GRMZM2G099337	chr9	113208704	113216726	33.3033	30.9424	30.5873	36.6324	33.1277	37.3695	22.1102	31.0168	41.8248	35.6679	31.5786	28.2068	47.4951	47.6988	41.2785	41.545	39.8402	39.9362	84.8072	34.7673	39.3699
GRMZM2G000271	chr10	128527295	128528576	0	0	0	0	0	0	0	0	0	0	0	0	0	0	0	0	0	0	0	0	0
GRMZM2G478568	chr1	259776857	259778542	643.731	388.066	436.008	277.781	298.013	321.683	283.466	413.887	285.027	362.539	354.423	245.633	396.978	442.428	201.999	273.03	575.742	294.935	338.75	265.365	249.726
GRMZM2G078118	chr5	215489563	215492824	111.551	304.903	286.938	179.256	243.353	265.433	244.401	291.875	324.645	142.071	148.993	65.4457	272.186	299.357	294.709	292.086	226.394	251.672	492.732	120.872	294.046
GRMZM2G037627	chr7	128741872	128743726	19.849	26.8005	21.4049	18.1309	24.7795	21.3272	23.2302	30.0225	23.0099	27.9136	24.0476	20.0237	14.1073	20.926	27.9353	19.5269	26.1128	36.1207	21.7884	36.6027	25.3703
GRMZM5G869403	chr6	153239561	153241947	110.998	87.609	26.8732	101.091	66.7365	110.924	82.4258	86.5332	84.2393	98.5694	51.3755	81.5592	94.9199	69.0977	83.3587	93.631	104.248	103.662	89.2847	107.397	103.758
GRMZM2G006445	chr1	297448006	297449981	0	0	0	0	0	0	0	0	0	0	0	0	0	0	0	0	0	0	0	0	0
GRMZM2G056513	chr2	3974037	3975171	159.044	126.149	161.662	180.513	143.433	168.208	100.774	197.299	74.5076	157.395	166.152	146.366	227.126	123.554	112.465	145.036	173.722	114.992	147.149	158.005	112.265
GRMZM2G172099	chr9	134769887	134772063	0	0	0	0	0	0	6.82461	0	0	0	0	9.85577	0	0	0	0	0	0	0	0	0
GRMZM2G456853	chr5	31581325	31583740	0.79082	0	0	0.64804	0	0.726373	0	0	0.577119	0	0.210582	0	0	0.294877	0.41055	0.44623	0	0	0	0	0.109028
GRMZM2G310155	chr9	151560266	151567145	18.5355	16.7349	11.3767	14.4546	16.7701	16.2191	14.8634	12.9416	20.5454	11.6921	15.9877	14.7148	14.0685	16.321	17.2745	11.7446	23.0077	13.0197	20.48	12.0211	18.7238
GRMZM2G028438	chr4	156022484	156024755	12.3724	18.0575	17.224	3.32703	7.72917	2.26644	6.19681	7.04927	1.98604	15.0981	6.21797	0	0	4.8634	2.77113	12.6639	3.60616	18.9543	3.7703	0	2.80613
GRMZM2G702612	chr4	145688352	145689813	0	0	0	0	0	0	0	0	0	0	0	0	0	0	0	0	0	0	0	0	5.01921
AC177908.3_FG002	chr1	72799952	72805415	59.4198	68.2784	59.9867	67.5714	78.579	87.7183	71.3082	73.4589	72.4463	63.6426	53.9669	49.4764	85.5081	64.3137	62.3551	72.6633	61.8402	60.6784	60.2938	52.4426	73.8204
GRMZM2G097802	chr2	101839930	101845445	84.3145	159.385	94.8225	108.412	146.627	203.463	185.329	241.933	180.712	184.991	193.801	162.467	254.232	193.495	228.099	102.756	202.363	210.327	229.561	254.886	200.128
GRMZM2G132958	chr1	267198373	267199873	11.5304	10.6414	7.58195	9.37587	13.2702	9.74344	11.1561	9.95728	10.4269	16.1468	13.5679	10.7457	8.43584	12.0668	4.93698	11.4573	13.6769	14.1715	22.7933	10.4589	9.26861
GRMZM2G702747	chr4	187744639	187744956	0	0	0	0	0	0	0	0	0	0	0	0	0	0	0	0	0	0	0	0	0
GRMZM2G016744	chr6	108970622	108971435	0	6.09168	0	6.63963	0	2.91681	5.22056	8.61708	5.14382	0	5.16506	0	0	6.91861	8.04417	3.44207	5.70741	0	7.91926	0	7.6736
GRMZM2G089421	chr9	152133374	152135613	1064.9	1256.22	1407.74	1001.62	1815.76	2084.44	1286.86	1485.27	1123.38	1019.79	953.419	590.836	2342.87	969.155	910.269	1159.11	783.185	679.549	814.641	694.754	1153.57
GRMZM2G180699	chr3	217630821	217633671	57.3205	56.5222	45.3313	40.6	94.1058	80.5594	62.7591	86.3905	88.2327	41.3	91.4588	66.8182	67.6811	72.5639	25.583	62.9137	75.9305	69.5924	63.9735	30.8704	78.8493
GRMZM2G125196	chr2	220036303	220037821	8.49202	23.7769	46.0168	0	110.982	0	0	0	0	8.96393	0	0	0	0	4.15294	145.655	6.33901	8.8812	7.11356	0	2.84838
GRMZM2G116704	chr10	91729913	91730391	0	108.176	0	0	0	0	0	0	2.17903	0	5.99954	0	0	0	0	0	0	81.3219	0	0	115.056
GRMZM2G169782	chr3	191051583	191054484	12.7871	20.3302	33.5103	12.9596	28.7346	11.5159	12.7914	20.3928	7.63605	7.81839	12.5041	12.4247	16.8068	20.4471	31.8118	10.8608	5.36085	26.0074	12.1408	12.3065	7.83891
GRMZM2G317262	chr9	133584917	133586689	43.1783	54.3999	62.6872	39.0186	28.5704	35.2644	40.1361	40.2676	51.5295	41.6699	49.3079	39.1529	33.456	50.3988	37.6078	35.7197	51.7584	28.4481	73.2735	42.9014	48.5267
GRMZM2G700349	chr7	170382278	170384332	0	0	0	0	0	0	0	0	0	0	0	0	0	0	0	0	0	0	0	0	0
GRMZM2G135904	chr5	59035359	59039093	103.382	102.304	130.419	140.181	126.565	132.83	88.3677	107.347	112.936	84.105	88.6003	59.1921	162.995	97.2256	111.238	91.8614	95.5381	108.492	79.6248	92.4048	105.79
GRMZM2G055450	chr3	206184415	206190867	76.71	94.8361	78.0084	74.2304	59.5733	75.3855	71.8103	78.2541	61.9188	87.378	70.9533	39.6605	64.7859	82.991	21.2996	61.8666	69.6695	59.9803	73.7064	43.1098	86.8098
GRMZM2G177244	chr3	165855196	165857807	0	0	0	0	0	0	0	0	0	0	0	0	0	0	0	0	0	0	0	0	0
GRMZM2G334105	chr8	98121988	98123143	0	1.63544	0	0	0	2.97958	0	2.06366	2.31269	0	2.01619	0	0	2.34291	1.46943	2.8897	0	0	0	4.46135	2.85106
GRMZM2G091819	chr10	16517474	16520678	0	0	0	0	0	0	0	0	0	0	0	0	0	0	0	0	0	0	0	0	0
GRMZM2G090715	chr7	162417513	162430709	120.336	128.704	93.1223	106.206	84.8947	123.899	108.876	74.4801	82.8475	126.812	101.89	129.342	91.6105	128.187	85.6266	97.6415	104.826	116.923	114.729	140.101	115.195
GRMZM2G319357	chr1	205241338	205247763	45.9942	99.3067	96.0023	70.3424	112.746	92.8161	82.126	62.947	77.0315	72.8804	74.4513	43.6317	114.345	119.645	109.341	69.9429	50.0968	86.8152	135.595	67.5589	88.5021
GRMZM2G057602	chr9	35291096	35294241	0	31.5351	13.9895	20.1926	0	0	0	9.82419	0	35.5318	0	66.3064	0	36.8643	24.7213	15.0527	13.6689	0	0.523535	9.39038	48.7165
GRMZM2G439784	chr3	230245925	230248823	5.99063	1.93906	0	11.2147	7.17601	3.10238	0	19.4479	2.84453	0	7.21729	5.53121	0	0	1.76709	3.22357	19.7908	9.51275	1.12128	0	5.01876
GRMZM2G147869	chr6	128797272	128798879	9.50793	60.5736	49.3951	58.3746	8.73272	64.0909	50.7361	55.1617	76.6784	60.5943	79.1693	19.1708	50.2553	12.7334	59.301	65.823	63.496	46.0379	68.4997	56.5382	56.6633
GRMZM2G088242	chr2	185016961	185019032	22.0867	24.2194	22.0015	19.2807	18.6333	15.5691	19.4232	15.9866	20.4333	29.2663	11.1531	23.693	8.2897	20.4454	25.3425	14.5335	20.0309	10.6674	13.7616	25.144	22.1935
GRMZM2G033388	chr10	147220167	147221148	0	0.642049	0	0	0	0.773849	0	0	0	2.36236	0	0	0	0.631592	0	0.357317	0	0	0	0	0
GRMZM2G148180	chr9	114278060	114282368	82.6099	79.2415	61.7866	69.7703	65.5931	63.3052	105.257	66.2376	50.9758	107.809	79.7185	98.8426	70.193	50.0722	69.7937	87.5721	94.917	64.9717	98.4014	91.6246	65.5461
GRMZM2G174449	chr4	25070679	25072205	0	0	13.3117	9.00923	19.3042	9.26123	23.9478	5.30181	11.9933	15.1122	3.22462	7.81323	21.6571	4.00031	12.8219	5.31885	5.48065	38.08	23.7236	11.2427	3.05842
GRMZM2G405133	chr6	114924201	114927420	0	0	0	0	0	0	0	0	0	0	0	0	0	0	0	0	0	0	0	0	0
GRMZM2G377373	chr1	108123118	108124375	0	1.57681	0	0	0	2.41115	0	2.53357	2.16787	2.80025	1.90215	0	0	2.1618	4.79937	2.30234	2.9943	0	2.84133	0	3.01114
GRMZM2G089017	chr4	179923553	179923921	0	0	0	0	0	0	0	0	0	0	0	0	0	0	0	0	0	0	0	0	0
GRMZM2G041613	chr1	109387173	109437074	46.027	47.7895	38.8232	49.0302	50.2221	53.1275	41.8056	50.8167	63.6702	55.5754	54.2809	47.8136	55.2248	52.8164	66.5084	43.7812	35.3937	44.3317	40.5353	29.2324	60.8396
GRMZM2G064371	chr10	26662880	26665955	163.994	147.288	126.283	66.8125	133.143	157.52	20.4201	167.019	186.067	13.9262	56.4428	143.51	144.164	71.5523	79.5228	137.542	95.0955	148.459	14.3202	86.5542	13.3786
GRMZM2G164912	chr5	202286046	202289158	12.1431	20.1089	34.1301	32.1281	35.1184	23.5355	15.7441	21.9125	21.3082	18.1389	27.7516	31.4815	25.6144	19.4911	27.0367	15.4538	7.52079	31.3943	29.4361	20.7325	26.3361
GRMZM2G179259	chr4	3389378	3390098	0	0	0	0	0	0	0	0	0	0	0	0	0	0	0	0	0	0	0	0	0
GRMZM2G026258	chr5	45118707	45125006	0	0.931365	2.37304	1.7014	0	1.82092	1.6819	1.49272	1.63104	1.89318	1.94912	0	0	3.45997	1.1131	2.01338	1.68833	1.07688	1.74114	0	2.42372
GRMZM2G462433	chr3	36182811	36183893	0	3.93747	0	4.28973	6.25699	13.0799	16.3949	7.64231	3.91627	0	3.59516	0	23.6507	8.21872	9.87231	13.2794	8.991	0	11.4296	12.6512	19.3726
GRMZM2G108149	chr9	100883409	100887676	90.1383	91.5771	82.214	160.554	86.5216	147.129	124.946	103.715	164.87	71.5224	133.058	82.006	84.7138	97.3165	111.308	91.7664	121.395	112.127	90.2468	77.9105	83.463
GRMZM2G348282	chr6	15493065	15499970	0	0	0	0	0	0	0	0	0	0	0	0	0	0	0.15671	0	0	0	0	0	0
AC191009.3_FG004	chr1	298501322	298503474	192.992	201.993	214.635	175.156	179.406	183.65	119.546	181.13	202.609	232.322	255.12	230.629	150.41	189.605	247.921	145.611	195.493	283.712	209.196	115.424	167.8
GRMZM2G086066	chr7	99384828	99386078	7.94887	4.4773	13.6324	23.0923	19.5351	20.7506	8.66894	6.48115	21.8854	11.1961	7.23903	0	15.3402	15.4443	8.09723	10.0705	7.99118	7.3015	16.7062	0	9.26974
GRMZM2G144841	chr9	113491527	113494829	75.8602	97.922	81.5122	104.178	0.225274	0.131626	94.589	37.6985	101.797	104.487	26.4932	7.79647	37.3393	0.425251	89.8836	48.3756	74.482	105.753	96.7012	72.3197	110.574
GRMZM2G013613	chr3	101146862	101147750	0	0	0	0	0	3.91867	0	0	0	0	0	0	0	0	0	0	0	0	0	0	0
GRMZM2G139952	chr8	3974146	3980783	155.395	118.286	114.114	137.217	104.226	139.382	143.918	146.935	127.151	146.801	148.021	143.211	134.412	116.368	119.237	120.135	128.898	93.9105	105.256	164.195	129.609
AC233966.1_FG001	chr2	152921099	152922543	12.7601	12.5544	21.1264	9.46655	11.8636	15.7998	11.6425	17.0185	10.6023	10.878	10.157	11.8046	8.1832	14.4527	10.1936	19.5301	13.7506	12.2646	11.087	30.9067	13.308
GRMZM2G139834	chr1	10899453	10901848	35.5547	16.5202	26.1277	77.9084	28.8508	39.9958	20.7744	7.73503	37.1898	18.9398	55.3462	23.0948	66.9479	63.5686	6.5725	10.8745	155.879	27.9768	50.043	82.9065	33.6236
GRMZM2G093344	chr1	109518	111769	7.23997	18.996	33.3991	12.0282	28.4229	25.0938	28.7981	16.0765	14.6398	48.9913	15.449	24.2039	31.999	18.48	22.3098	15.4027	22.9114	12.9746	19.6737	26.183	15.51
GRMZM2G093501	chr4	6803593	6804432	0	0	0	0	0	0	0	0	0	0	0	0	0	0	0	0	0	0	0	0	0
GRMZM5G865550	chr4	67295505	67296321	0	0	0	0	0	0	0	0	0	0	0	0	0	0	0	0	0	0	0	0	0
GRMZM2G124593	chr4	12974974	12984124	70.8057	75.7346	87.4919	64.0887	98.5965	84.0865	46.9797	96.6018	153.41	78.2405	62.4232	59.5175	95.4774	94.1409	118.281	88.274	75.708	76.8193	65.6428	109.935	88.9705
GRMZM2G109515	chr10	62156960	62163123	38.3536	43.7036	65.0062	29.2954	32.2461	34.5401	14.9917	29.1807	23.7384	40.6437	26.6946	38.2938	16.9635	42.8931	31.0105	70.6382	58.9351	0	50.0623	27.5784	37.2701
GRMZM2G026490	chr5	147625051	147631050	58.9073	49.1435	54.9727	50.7986	53.2575	57.6366	50.1146	53.3094	63.9841	57.9359	51.1597	59.4776	60.9708	42.7245	63.55	56.5524	51.7399	37.0091	47.569	64.2641	48.2288
AC191360.3_FG015	chr4	238292816	238294377	0	0	0	0	0	0	0	0	0	0	0	0	0	0	2.05832	0	0	0	0	0	0
GRMZM2G099745	chr9	37407305	37409725	497.302	638.685	552.846	443.258	425.694	429.862	415.504	412.577	422.31	714.537	587.188	423.72	387.698	686.078	533.024	562.334	800.021	562.92	547.22	450.153	786.904
GRMZM2G420199	chr2	48940818	48946920	0.590892	0.823066	0.663496	3.05804	0.920151	0.985817	2.29625	3.8043	1.33364	1.32185	0.417469	0	0	1.65935	2.77289	2.66318	1.59898	1.92371	2.39117	2.29728	2.9262
GRMZM2G460246	chr6	63877126	63878560	0	0	0	0	0	0	0	0	0	0	0	0	0	0	0	0	0	0	0	0	0
GRMZM2G038501	chr10	68529957	68531119	0	0	0	0	0	0	0	0	0	0	0	0	0	0	0	0	0	0	0	0	0
GRMZM2G018022	chr3	152578168	152583082	3.35642	4.847	13.0613	8.21187	96.1192	2.72559	50.3838	3.09682	3.48245	54.7781	3.21492	3.53629	8.67507	55.2667	82.2984	3.57784	1.82128	3.55867	3.31162	58.1525	4.18032
GRMZM2G470419	chr6	91367333	91369629	0	0	0	0	1.4727	0	0	0	0	0	0	0	0	0	0	1.58898	0	2.28887	0	0	0
GRMZM2G126190	chr4	214239083	214241779	899.723	980.885	961.376	1105.34	878.698	935.151	941.397	982.244	1052.87	1040.03	921.803	690.589	808.975	1163.51	830.877	912.626	724.984	754.756	932.721	1094.48	1218.67
GRMZM2G160460	chr6	165131592	165137461	148.948	235.063	117.846	140.651	95.4991	145.636	131.949	163.781	87.3051	112.681	160.127	110.201	140.914	168.431	190.407	141.313	193.596	199.036	287.039	125.978	153.807
GRMZM2G031586	chr10	141940680	141943122	446.37	439.169	280.532	176.822	139.516	141.081	303.532	209.512	256.945	441.49	255.654	320.787	118.199	287.336	127.96	278.945	255.943	125.458	145.93	404.831	189.044
GRMZM2G181158	chr2	201127831	201131690	24.7253	22.3621	21.9387	37.0663	35.4123	32.367	31.5223	34.9977	32.2501	27.0661	33.1958	31.8181	32.7395	41.0676	41.1761	34.7578	35.3196	40.3378	21.0119	31.545	28.5984
GRMZM2G180458	chr1	29254236	29256101	107.954	105.607	123.711	128.212	105.471	116.927	142.466	120.32	124.309	109.973	156.991	144.795	103.847	123.507	119.311	101.292	174.121	112.345	133.144	165.116	138.082
GRMZM2G055446	chr3	18818401	18819808	6.41498	2.47249	8.7037	5.08719	0	5.37227	0	6.76293	5.35542	7.72631	0	0	0	0	0	8.61746	3.58864	0	0	0	5.05829
GRMZM2G097286	chr10	31976517	31978187	0	0	0	0	0	0	0	0	0	0	0	0	0	0	0	0	0	0	0	0	0
GRMZM2G007300	chr3	181446790	181451575	261.449	295.056	264.34	317.267	269.138	250.365	240.214	278.816	210.902	258.978	272.678	285.328	270.481	264.328	208.462	312.498	267.484	236.787	211.953	235.884	218.093
GRMZM2G138230	chr7	150501749	150512229	101.337	100.231	80.7494	108.43	93.8861	100.126	97.665	104.671	96.7081	104.162	101.211	113.309	98.1061	103.718	91.2338	104.154	94.8526	97.0483	90.7833	94.9773	109.919
GRMZM2G112251	chr9	139174439	139175151	0	6.07211	6.90145	0	0	0	0	0	0	0	0	0	0	0	0	0	0	0	0	0	0
GRMZM2G075956	chr8	166078535	166081808	108.827	138.553	128.647	155.247	104.554	153.586	109.367	170.976	120.017	113.806	135.858	142.611	85.7346	152.06	142.808	123.437	104.772	112.05	159.908	99.4904	144.903
GRMZM2G465226	chr7	3483731	3484794	154.813	93.8289	196.845	115.497	316.763	95.72	117.153	103.315	568.768	163.661	136.642	663.415	316.835	166.674	330.965	256.553	363.359	142.395	821.49	66.7162	112.777
GRMZM2G126447	chr5	144703541	144714347	75.0438	76.7632	79.3563	93.4445	69.7662	90.0383	90.7197	106.32	92.0156	80.1316	87.5269	77.0007	76.0049	79.5813	85.6314	98.5833	85.4001	73.186	89.7278	77.453	90.6154
GRMZM2G125004	chr2	211511919	211513910	10.4064	8.4482	8.40187	3.7855	6.36184	8.27877	7.96349	7.0366	5.09406	9.5262	5.45532	6.59885	5.39166	8.45878	9.88164	9.45628	6.3349	8.17279	12.8735	0	10.1637
GRMZM2G045268	chr3	218910517	218916860	0	0	0	0	0	0	0	0	0	0	0	0	0	0	0	0	0	0	0	0	0
GRMZM2G004583	chr7	134086105	134096942	293.401	278.482	259.01	254.955	197.134	285.238	253.945	302.194	286.641	256.407	413.245	140.668	200.839	323.96	299.775	311.144	302.042	201.552	319.414	290.748	319.935
GRMZM2G041633	chr2	189965765	189971323	68.0153	130.689	79.9897	71.1245	79.967	79.3541	84.6837	105.125	79.3133	90.4422	95.5307	94.4766	94.3525	88.5633	84.7889	126.554	75.0828	83.3845	104.184	53.2064	86.0952
GRMZM2G005909	chr5	193656290	193657722	92.79	92.2368	72.737	104.848	79.4364	120.533	116.099	48.7577	92.6149	83.4891	95.4644	69.6579	84.5572	87.7218	114.15	43.2179	91.3569	54.5823	93.0332	93.4784	57.6879
GRMZM2G312838	chr7	64582958	64584699	48.1884	48.3014	54.0503	56.8005	38.7334	64.8397	44.6349	69.0862	51.8664	69.1392	49.9017	39.7333	46.2919	35.2747	51.8181	54.4299	66.6966	64.4719	49.3983	58.6972	71.7805
GRMZM2G455115	chr2	84689058	84697346	22.1821	31.974	28.7448	38.426	28.1549	46.8503	25.9682	48.8777	41.2248	23.2861	34.1785	24.2387	44.0214	37.3137	36.4009	43.5561	35.1201	39.9588	33.1532	24.0056	37.1328
GRMZM2G008657	chr7	83367344	83368366	45.3735	40.5831	34.4975	33.5314	39.8363	38.5486	26.9461	40.9242	38.4197	49.0401	56.6111	46.6935	23.9777	47.7451	35.8498	36.0061	53.3051	17.0845	39.3528	50.0175	42.3287
GRMZM2G045049	chr2	4204205	4207300	76.2159	69.242	82.1919	86.2656	78.0702	83.2782	101.95	125.079	97.967	72.178	57.4936	103.698	118.517	85.331	70.1478	80.5066	79.4183	43.1688	78.1737	72.8433	76.1472
GRMZM2G166230	chr2	157234437	157235974	0	8.52701	16.2767	0	0	0	32.6342	0	23.0455	15.9711	0	0	0	3.19921	28.5903	0	0	15.6334	30.719	0	26.4496
GRMZM2G424727	chr6	63907584	63914582	0	0	0	0	0	0	0	0	0	0	0	0	0	0	2.31136	0	0	0	0	0	0
GRMZM2G137558	chr2	188414699	188417396	98.4046	124.654	131.333	147.572	186.211	111.613	78.6896	94.1532	117.754	159.476	130.031	102.663	137.281	128.418	113.108	95.042	82.6006	125.957	79.1742	80.9548	128.227
GRMZM2G703173	chr2	133297221	133297988	0	0	0	0	0	0	0	0	0	0	0	0	0	0	0	0	0	0	0	0	0
GRMZM2G073860	chr10	27459571	27462677	88.1055	100.52	111.49	94.5642	172.832	82.5077	68.5603	76.5526	91.2935	102.188	92.5852	84.2084	97.8883	156.951	58.7533	85.7448	122.173	92.2542	85.2496	53.959	68.8712
GRMZM2G009717	chr6	157983353	157989292	35.1465	29.1669	33.4408	33.5472	35.9383	36.5638	23.6401	27.064	37.5926	29.1433	35.2912	24.9059	35.9755	35.6696	38.6101	23.9531	34.8411	29.625	31.412	32.1312	42.4854
GRMZM2G095724	chr3	165613619	165614783	83.7328	58.4082	76.4618	102.198	64.8151	77.3772	67.0865	73.3634	88.0704	75.0575	100.295	56.8673	84.5372	65.1013	73.9112	70.94	75.0044	78.6291	64.0549	55.7107	60.8314
GRMZM2G411766	chr8	148006877	148008698	0	0	7.02386	10.5381	0	0	10.1212	0	0	0	0	0	9.34394	5.12971	2.39881	0	0	0	0	0	3.72266
GRMZM2G049141	chr2	83539267	83558706	88.3591	97.8238	93.3657	139.804	103.649	127.624	106.125	112.77	119.014	120.424	98.2781	118.233	111.359	121.047	87.7052	122.577	112.255	110.473	99.7138	94.6055	102.821
AC233953.1_FG003	chr8	159456350	159460830	0	0	0	0	0	0	0	0	0	0	0	0	0	0	2.0729	0	0	0	0	0	0.748105
GRMZM2G052728	chr1	36434464	36444054	2.52816	1.59105	1.11865	2.06359	0.893041	2.75124	1.67214	2.5619	1.84136	2.76615	2.82361	2.62694	1.46056	3.13861	2.14129	1.75403	0.837154	2.37938	2.9125	1.8972	2.00075
GRMZM5G837318	chr1	9704588	9748769	0	0	0	0	0.159081	0	0	0	0	0	0	0	0	0	0	0	0	0	0	0	0
AC200057.4_FG007	chr7	140686654	140691401	42.2285	35.8888	31.6673	29.4623	33.3416	31.9389	28.7974	37.4969	43.1448	35.32	39.0508	35.8965	37.2915	39.7992	32.1304	30.4276	17.8635	27.4687	30.2999	23.7562	37.2302
GRMZM2G164489	chr5	216380863	216385118	63.7434	48.8314	59.5291	54.4047	56.3167	57.9909	54.1051	53.4005	48.8317	66.6018	62.5779	64.5121	45.5076	62.4662	59.7388	60.7365	62.3599	42.1196	58.7438	56.8594	70.096
GRMZM2G039370	chr5	25272095	25272994	0	0	0	3.33104	9.08956	0	6.68877	4.1343	3.46783	4.13019	8.02558	0	0	3.90372	2.29133	3.53089	0	0	5.79788	0	2.27544
GRMZM2G472473	chr1	34618106	34618540	0	0	0	0	0	0	0	0	0	0	0	0	0	0	6.83156	0	0	0	0	0	6.37069
GRMZM2G000719	chr8	148790958	148795942	54.0768	33.8172	26.9591	65.43	54.5288	64.2009	66.2753	45.2776	30.4165	42.054	102.072	36.9754	38.5299	50.4241	32.8021	57.7311	37.9718	29.6149	40.545	40.834	51.1527
GRMZM2G090744	chr7	994674	997423	29.3755	20.4714	22.4083	16.6125	21.1711	20.1086	11.7007	13.4577	16.6431	11.2918	19.6028	17.5324	10.0557	19.6047	20.2693	24.5796	10.221	15.4992	21.2495	16.8395	18.5974
GRMZM2G170805	chr5	57505366	57508745	224.711	203.998	231.868	266.077	233.879	433.717	398.419	266.504	228.269	239.596	272.469	257.33	257.77	318.967	213.13	308.998	237.638	283.223	244.843	133.134	280.569
GRMZM2G058531	chr10	3184716	3188214	23.5071	17.3991	20.1858	17.9327	8.85103	15.9309	13.5229	18.8534	13.8024	13.0161	10.9626	28.3355	4.8044	9.2435	15.5405	25.1847	24.0728	19.3507	26.9359	23.9402	22.0971
GRMZM2G168119	chr6	113343611	113346307	116.833	124.805	133.826	9.77236	105.574	107.589	91.7107	151.161	112.486	126.192	104.943	111.033	84.1674	97.1279	134.77	116.944	86.6286	121.376	81.7854	118.214	98.6605
GRMZM2G363557	chr4	37349031	37351712	0	0	0	0	0	0	0	0	0	0	0	0	0	0	0	0	0	0	0	0	0
GRMZM2G142063	chr7	5335383	5337829	43.9018	65.6444	39.1753	68.4882	60.9245	40.4264	64.6423	14.392	30.6978	112.165	45.5474	58.0369	84.5856	46.7762	30.0705	78.3403	31.8622	16.0496	79.2445	77.8907	66.4848
GRMZM5G817173	chr3	191840045	191843911	4.3245	10.2589	8.6109	7.15605	12.089	0	10.2862	7.67549	3.53649	9.50393	2.50506	6.98471	0	8.45374	8.90551	6.85265	5.81152	34.9226	10.1573	10.5694	13.8189
GRMZM2G049378	chr8	148645308	148647993	21.5181	0	9.91744	0	8.98382	33.0685	0	14.4461	38.3286	0	18.2585	0	0	0	15.4659	9.8817	26.7823	11.9798	7.89367	0	19.3672
GRMZM2G036534	chr10	11749518	11756094	191.372	186.759	168.007	207.541	120.686	184.719	215.301	203.908	180.63	168.331	196.286	205.238	132.182	184.829	141.315	180.242	174.596	120.955	191.51	181.566	210.113
GRMZM2G132994	chr10	125112522	125115746	32.5856	35.1599	40.4608	41.5282	48.6433	85.3088	38.1126	50.9173	31.6134	24.9788	34.0282	30.8518	46.7062	37.4013	43.4101	38.5461	30.2393	33.2327	37.4346	39.0512	33.2769
GRMZM2G063550	chr9	17397397	17399594	0	0	0	0	0	2.70218	0	0	0	0	0	0	0	0	0	0	0	0	2.19032	0	2.33927
GRMZM2G037177	chr7	169836953	169839970	560.561	553.856	658.699	575.389	572.801	708.028	503.783	594.342	577.179	559.398	485.428	515.522	573.168	506.132	535.419	588.074	526.106	444.072	522.662	578.24	454.924
GRMZM2G054115	chr3	202718208	202721089	162.62	223.848	185.343	290.937	58.3798	351.685	131.001	121.674	433.353	178.297	133.383	262.758	74.9945	156.638	257.603	115.75	28.285	247.845	182.718	203.81	89.8393
GRMZM2G033413	chr9	8228732	8238999	39.4585	33.7884	36.3643	72.7579	58.5841	25.2042	45.8519	37.9734	102.601	42.3887	36.7828	27.1974	53.9547	25.5061	66.4345	38.7953	58.513	35.9053	57.9325	23.4421	60.7618
GRMZM2G137421	chr6	103602045	103609491	7.50072	6.15468	8.58415	8.65767	9.0817	9.19282	4.69433	6.93099	8.48203	4.11016	4.37068	10.4401	9.87968	7.34615	4.76823	6.4849	3.59472	9.18519	6.54502	8.85042	4.40537
GRMZM2G377079	chr3	96120727	96123147	10.7289	4.83159	4.84807	4.76964	7.34564	11.4664	0	6.72976	0	0	8.5021	0	0	10.4296	4.45185	0	0	6.2867	6.87176	0	10.7053
GRMZM2G050939	chr6	29282247	29286063	60.5509	51.2644	71.2844	54.6357	64.9975	51.9565	39.5462	53.1457	71.8081	32.7297	64.0717	38.8161	57.401	62.3262	52.8727	44.6462	38.7042	66.1828	85.1561	33.1758	45.4519
GRMZM2G013908	chr9	142035043	142040976	62.3015	68.2877	71.271	74.4836	69.5799	65.1304	77.6099	59.6402	83.1163	65.0702	51.2606	56.2785	81.7636	87.7657	57.4475	93.1244	73.0046	80.0426	66.561	50.7803	77.6583
GRMZM2G179693	chr8	146189079	146192411	83.0462	96.9637	62.8068	94.057	66.4517	83.6296	122.916	92.6168	71.0275	75.822	113.762	89.1752	80.402	94.2151	69.418	71.5108	102.852	53.0284	85.3989	85.7815	76.258
GRMZM2G149288	chr7	86858828	86860406	6.74385	0	4.3177	0	0	0	0	0	0	0	0	0	0	0	1.99495	0	0	0	0	0	3.14619
GRMZM2G123544	chr4	170972669	170977319	8.56844	11.635	13.2814	10.0568	19.3164	13.5916	14.7231	10.069	13.4587	13.3413	10.5354	5.94137	10.6452	11.3326	12.9706	11.1753	10.1808	8.59312	11.207	10.9963	14.4842
GRMZM2G170734	chr7	62130992	62132323	0	0	0	0	0	0	0	0	0	19.065	0	0	0	0	0	0	0	7.41237	6.32868	0	0
GRMZM2G472945	chr5	90761653	90764254	12.043	17.3791	14.47	19.7079	20.9041	8.95936	14.5967	11.3443	12.2817	10.158	16.5828	12.1625	14.6516	15.469	18.8158	11.7197	20.2295	7.36481	19.409	20.2547	14.2813
GRMZM2G108501	chr6	21316339	21317110	0	0	0	0	0	0	0	0	0	0	0	0	0	0	0	0	0	0	0	0	0
AC190812.3_FG006	chr8	164651211	164651926	0	0	0	0	0	0	0	0	0	0	0	0	0	0	0	0	0	0	0	0	0
GRMZM2G438673	chr8	156464532	156468901	75.591	108.864	88.0688	63.6421	57.0805	83.9909	58.5138	108.081	71.0539	79.1925	80.1847	49.5005	48.4229	98.5039	71.9506	96.7529	62.9323	43.4457	79.2822	75.8158	103.33
GRMZM2G000703	chr6	51214798	51215380	0	0	0	0	0	2.36022	0	0	0	0	3.64265	0	0	3.36741	0	0	0	0	0	0	3.61217
GRMZM2G051852	chr10	125719261	125721216	3.65595	4.47754	4.17821	1.80574	0	0	0	2.60289	3.17051	4.12112	0	3.3667	0	4.44329	3.55332	3.07967	4.43432	0	5.74279	0	6.82043
GRMZM2G430646	chr8	92935643	92937154	0	3.80345	0	0	0	11.0811	0	4.37353	0	0	0	0	0	0	0	0	0	0	0	0	2.78564
GRMZM2G313110	chr2	226178169	226179367	0	0	0	0	0	0	0	0	0	0	0	0	0	0	0	0	0	0	0	0	0
GRMZM2G157683	chr9	128089496	128090507	413.776	7263.27	10080.9	116.652	105.935	1603.26	1480.94	804.873	1836.99	1179.77	64.4137	811.257	681.334	934.79	139.764	690.937	1314.77	1114.44	1664.02	385.23	1074.39
GRMZM2G422670	chr1	298964497	298966207	52.2361	32.6425	33.8829	54.7605	34.8595	61.9421	16.8985	36.2801	23.8605	43.2805	41.7077	18.696	58.2338	27.5037	56.6484	43.4023	25.1594	28.8443	33.3961	27.4982	36.3006
GRMZM2G139878	chr1	70721662	70723841	0	0	0	0	0	0	0	0	0	0	0	0	0	0	0	0	0	0	0	0	0
GRMZM2G101559	chr6	159769938	159770481	0	0	0	0	0	0	0	0	0	0	0	0	0	0	0	0	0	0	0	0	0
GRMZM2G163473	chr8	164180734	164185848	115.51	272.014	282.716	236.915	136.307	209.813	219.426	162.228	271.434	123.467	196.202	103.413	132.624	158.038	302.34	148.915	203.499	240.08	205.964	164.928	160.17
GRMZM2G401830	chr8	110088753	110089920	0	7.06215	10.4394	4.59103	0	7.87033	0	7.80192	7.06838	0	0	0	0	5.7749	7.88354	7.18913	0	0	4.83964	0	7.27853
GRMZM2G172795	chr2	18417369	18421827	0	0	3.31957	4.33904	3.87996	3.0015	0	6.19032	4.63364	0	0	0	0	11.035	1.45121	0	5.65378	0	4.05104	0	3.85178
GRMZM2G035688	chr2	27478702	27483682	0	0	0	0	0	0	0	0	0	0	0	0	0	0	0.519297	0	0	0	0	0	0
GRMZM2G171650	chr3	158979320	159007265	51.7316	48.4159	6.62383	21.7276	10.1648	33.237	0	19.354	29.0271	29.5691	28.9978	20.8756	0	30.2232	21.9056	30.8034	48.5372	36.974	27.7005	18.8251	51.0714
GRMZM2G059039	chr4	219778504	219800726	108.631	123.928	117.033	132.185	104.437	125.795	98.088	167.136	116.903	125.576	98.3605	111.108	123.284	136.869	113.981	120.141	106.228	93.1394	95.6289	114.683	135.503
GRMZM2G702170	chr5	199070779	199071674	0	0	0	0	0	0	0	0	0	0	0	0	0	0	0	0	0	0	0	0	0
GRMZM2G093139	chr5	10009745	10012288	115.735	116.468	122.766	112.777	134.4	93.3744	99.9402	114.99	108.942	117.135	107.378	92.6411	96.7132	124.948	115.996	103.705	130.221	103.656	107.869	135.927	143.679
GRMZM5G881902	chr2	230133345	230134307	11.9238	0	6.83686	0	0	2.70377	19.2619	0	0	0	0	2.61221	0	0	4.31965	0	0	0	4.14714	0	0.490982
GRMZM5G800734	chr7	138591140	138594806	375.198	366.423	418.124	404.624	330.497	452.968	402.523	433.003	373.206	427.942	427.6	370.218	283.276	389.545	352.826	464.264	382.262	405.773	473.038	431.083	488.88
GRMZM2G034623	chr9	69569539	69570411	0	8.08379	15.9343	33.4085	23.6627	6.36474	0	15.8929	8.69303	23.3418	9.30765	12.6625	31.1243	13.9442	13.4702	58.312	16.1712	33.0267	6.78706	0	12.1399
GRMZM2G371313	chr6	158265841	158267224	233.668	275.621	177.095	254.401	214.828	195.427	247.857	154.5	258.042	132.727	114.231	135.165	199.049	215.769	237.26	180.425	206.466	210.697	246.078	164.603	155.62
GRMZM2G093076	chr4	28638062	28639331	11.6689	0.602249	13.147	3.55975	0	0.191992	0	0.56515	0.843342	0	0.504532	0	7.60122	4.71043	0.255739	0	0	2.14475	1.15046	1.20911	1.25775
GRMZM5G842410	chr8	105817793	105818099	0	0	0	0	0	0	0	0	0	0	0	0	0	0	0	0	0	0	0	0	0
GRMZM2G308457	chr1	218562776	218565333	0	0	0	0	0	0	0	0	0	0	0	0	0	0	0.847519	0	0	0	0	0	0
AC186781.4_FG006	chr7	139424718	139427275	1.72582	2.23751	1.76905	3.00221	4.88203	3.25881	4.15963	4.45606	1.79818	4.59684	5.35508	6.36599	0	4.1638	2.57953	8.09258	3.02797	2.79346	1.69803	4.63231	5.56482
GRMZM2G031435	chr6	160119166	160123160	91.8734	83.6914	93.0021	79.8747	97.5694	86.5798	68.7966	89.0287	85.5563	101.112	78.7539	67.5076	71.5375	100.613	87.015	85.7319	89.5662	80.7408	85.225	78.8935	87.1234
GRMZM2G474973	chr1	8205232	8206963	3.94199	2.48592	1.95655	6.76848	0	2.13346	0	2.61296	3.22982	4.31889	0	4.75041	0	3.74514	2.69247	2.94596	2.11046	1.67358	8.56555	5.32251	2.7808
GRMZM2G009223	chr7	153821343	153823803	1007.32	384.325	856.138	578.067	433.227	657.433	551.965	572.206	504.226	488.142	472.982	516.725	769.307	309.81	611.813	373.194	773.687	280.229	602.756	426.461	384.545
GRMZM2G319104	chr6	46344961	46357485	0	0	2.35449	0	2.0088	3.26782	0	1.91945	1.60995	0	2.50043	0	3.805	3.50638	0.607824	2.01418	0	2.33422	0	0	3.03494
GRMZM2G024260	chr5	137557459	137570282	7.27653	13.1092	5.70071	7.91236	10.0707	14.1827	0	11.7006	11.6296	10.1759	19.7866	0	21.4273	7.19253	8.86098	10.6816	8.54121	7.0376	11.2435	15.4131	13.0586
GRMZM2G042516	chr8	101872863	101874331	113.922	360.635	116.974	254.32	260.669	270.65	245.863	190.613	314.051	143.473	298.602	164.575	281.244	305.32	244.847	228.813	291.609	105.018	220.574	208.419	227.413
GRMZM2G170934	chr2	233672746	233676842	127.651	88.884	119.125	85.4244	116.457	115.293	104.856	102.642	124.03	25.7251	114.635	115.218	125.693	131.876	121.371	142.516	136.509	171.737	126.504	94.4335	146.338
GRMZM2G027797	chr1	263941536	263946428	0	1.98892	0	0	0	0	0	0	0	0	0	0	0	0	1.71324	0	0	3.84461	5.30621	6.76857	1.69662
AC200256.3_FG003	chr1	234939754	234940706	0	0	0	0	0	0	0	0	0	0	0	0	0	0	0	0	0	0	0	0	0
GRMZM5G822352	chr1	281862613	281862964	0	0	27.6717	0	0	0	0	0	24.8918	0	0	0	0	36.204	14.0295	0	42.7832	0	26.484	0	0
GRMZM2G064590	chr1	241500856	241508049	94.1649	145.905	122.42	134.267	167.39	141.268	143.448	156.461	172.039	108.817	98.6645	96.0149	135.456	132.335	187.754	126.709	109.234	133.41	128.583	100.946	166.184
GRMZM2G703866	chr1	197426280	197427707	0	0	0	0	0	0	0	0	0	0	0	0	0	0	0	0	0	0	0	0	0
GRMZM2G088737	chr5	63325380	63329467	55.4018	47.0657	42.6851	60.563	49.6052	56.1031	63.8827	55.4822	67.7019	51.1647	65.9829	62.2568	55.2264	53.8747	55.0903	58.8405	60.1292	51.8215	56.5795	61.49	49.4847
GRMZM2G058033	chr6	99272412	99273843	0	0	0	0	0	0	0	0	0	0	0	0	0	0	0	0	0	0	0	0	0
GRMZM2G465213	chr9	135480429	135481429	0	0	0	0	0	0	0	0	0	0	0	0	0	0	0	0	0	0	0	0	0
AC191264.3_FG002	chr7	150153354	150155925	0	0	0	0	0	0	0	0	0	0	0	0	13.1153	0	1.5537	0	0	0	0	0	0
GRMZM2G000510	chr4	32432	63643	223.985	276.662	295.045	237.151	274.829	289.976	154.011	261.025	193.66	227.131	210.662	202.041	238.349	265.214	243.037	293.383	189.304	260.574	179.611	219.693	329.097
GRMZM2G041493	chr2	117455643	117456806	0	0	56.1509	0	0	0	25.6881	32.607	39.2355	59.1364	0	71.7273	0	58.6996	42.9956	0	48.6192	69.9474	62.5771	29.7125	0
AC209784.3_FG007	chr3	181108342	181111529	15.5578	20.3361	15.3677	55.7527	212.381	43.999	43.6025	37.5924	136.095	36.2247	27.3531	24.7257	38.0885	32.2125	91.4669	23.0489	18.9585	60.4442	21.736	19.4257	42.1093
GRMZM5G847362	chr9	22674230	22675705	0	0	0	0	0	0	0	0	0	0	0	0	0	2.16294	0	0	0	0	0	0	0
GRMZM2G466044	chr5	191217941	191219471	10.0311	6.54895	14.5978	8.81814	23.6185	4.42692	5.11218	10.3941	9.17532	10.4065	13.5969	13.3895	9.39374	5.52709	6.1833	8.44035	13.2764	23.9283	7.68755	6.28967	14.7749
GRMZM2G017145	chr7	167497699	167504924	41.4423	39.3015	34.5051	41.0796	41.907	29.5152	44.6375	49.3824	39.357	41.3529	42.4738	40.8889	53.3858	45.8263	30.2732	30.3558	35.7547	40.0005	32.7909	47.7824	66.7269
GRMZM2G105307	chr3	183259254	183263602	74.4467	65.1087	73.4416	81.4968	55.3654	78.2383	78.2637	102.973	84.7653	55.6354	82.1516	111.081	71.6649	77.3774	103.854	79.4977	44.1274	95.8796	57.4812	62.9834	117.615
GRMZM2G016232	chr3	13951527	13953150	1688.48	1323.39	1933.35	1852.67	687.06	1330.96	588.709	1918.21	1096.93	743.884	1389.51	1362.42	921.706	1151.18	1119.74	1385.55	1493.06	833.883	1563.46	582.62	1542.18
GRMZM2G116271	chr3	202254192	202256934	0	0	0	0	0	0	0	0	0	0	0	0	0	0	0	0	0	0	0	0	0
GRMZM2G470499	chr8	174322439	174326592	5.48131	5.57851	111.138	19.7341	0.729861	0.447325	1.66164	0.667894	1.00632	10.7341	5.12209	18.7006	9.83903	0	0.828829	9.36339	7.11323	7.10245	1.00437	7.65917	12.6223
GRMZM2G477885	chr3	114890785	114891433	0	0	0	0	0	0	0	0	0	0	0	0	0	0	0	0	0	0	0	0	0
GRMZM2G040828	chr1	28641980	28643490	9.63081	7.04638	8.92892	9.05033	15.689	10.222	8.16548	10.1107	11.1054	12.5333	9.06938	19.1604	16.1615	5.8763	12.1404	8.82987	13.5759	8.33984	6.84964	13.5641	12.7921
GRMZM2G102347	chr1	34405243	34408863	97.0839	143.499	144.89	130.078	170.168	186.236	170.151	127.402	187.893	110.724	120.951	104.618	165.81	159.465	208.87	114.309	83.9825	139.321	151.301	118.134	114.876
GRMZM2G086430	chr2	16348455	16353827	68.8664	37.3925	62.8748	73.9807	62.1038	20.9362	23.5995	22.8383	19.4452	53.7809	42.0599	47.1023	21.0744	27.5782	44.5504	70.3811	24.6415	82.0143	37.5555	32.7784	21.5699
AC217293.3_FG007	chr2	231712003	231718219	62.4384	72.9237	259.434	88.9336	316.12	314.171	20.1307	77.2667	130.768	128.73	79.9075	220.526	372.237	41.3329	106.464	192.554	44.4301	200.991	70.9783	137.329	179.49
GRMZM2G429972	chr9	136787493	136793177	0	57.3484	54.7156	0.558493	0	7.54708	2.26281	70.1403	0.862189	16.672	0	1.68252	0	52.7057	0.400539	0	1.19931	1.08454	0.762034	14.9011	0
AC200240.3_FG002	chr8	131226019	131226756	0	0	0	0	0	0	0	0	0	0	0	0	0	0	0	0	0	0	0	0	0
GRMZM2G161302	chr7	132064764	132074425	285.58	237.095	331.22	272.253	311.735	267.502	200.885	254.663	275.451	214.187	176.297	183.755	229.381	253.849	213.151	317.527	176.337	316.823	303.605	237.127	345.826
GRMZM2G125356	chr10	122230412	122232602	0	0	0	0	0	0	0	0	0	0	0	0	0	0	0	0	0	0	0	0	0
GRMZM2G074466	chr3	219834664	219847650	86.6299	91.31	85.5399	99.0036	96.077	115.481	148.762	98.2189	127.203	82.1219	91.3762	105.881	122.187	105.079	84.9996	101.317	92.5448	94.6801	101.04	70.7243	79.3289
GRMZM2G177561	chr2	51626283	51630650	10.8016	6.32722	10.8764	13.6939	13.0195	0	16.2323	6.17559	16.0514	0	15.2577	0	0	6.91654	12.856	13.2701	10.6387	0	6.70568	0	8.71307
GRMZM2G121418	chr9	42528526	42532016	1.91468	3.2981	3.47322	8.19531	2.75553	4.00471	3.05634	7.87425	1.93006	3.43715	6.78357	3.18358	0	6.06591	4.2727	2.49272	4.18086	2.63526	2.39964	0	2.83421
AC194592.2_FG001	chr6	122382034	122383347	0	0	0	0	0	0	0	0	0	0	0	0	0	0	0	0	0	0	0	0	0
GRMZM2G006428	chr10	127339183	127349430	99.6433	80.309	82.399	109.166	83.3904	79.624	85.1386	79.7175	101.528	104.275	121.055	111.975	75.4981	78.0968	93.8365	82.4425	113.47	97.3215	96.2464	113.351	93.2287
AC214438.3_FG002	chr4	43488757	43489249	0	0	0	0	0	0	0	0	0	0	0	0	0	0	0	0	0	0	0	0	0
GRMZM2G029632	chr2	171228781	171233535	38.0872	44.1798	44.2091	49.9962	23.9378	30.175	55.6463	32.7905	48.9029	45.48	43.2952	36.7404	48.9326	45.412	44.5232	50.7084	39.4128	24.7419	51.4032	42.5833	49.1169
GRMZM2G097524	chr9	124735596	124736454	0	0	0	0	0	0	0	0	0	0	0	0	0	0	0	0	0	0	0	0	0
GRMZM2G158489	chr7	13610538	13613605	56.709	110.055	123.22	100.482	54.2203	116.23	50.4185	110.602	83.2913	50.6103	73.1752	75.881	59.6759	68.9254	51.8425	85.099	59.842	56.6308	50.6686	58.5672	100.491
GRMZM2G140917	chr6	86747562	86755916	176.696	149.373	146.899	156.728	112.135	143.333	132.924	141.411	149.654	159.387	186.032	164.75	135.262	142.567	157.356	171.827	177.951	133.339	173.277	143.258	174.448
GRMZM2G150014	chr10	147579293	147582200	37.0364	41.3962	45.6906	45.0359	35.6009	38.7643	40.4532	38.7556	69.2675	44.4595	46.2564	46.5501	51.9869	46.1639	60.248	46.1779	53.5857	72.0866	49.4927	47.9328	60.4627
GRMZM2G016640	chr3	193310870	193311970	19.5342	25.5005	13.8915	22.411	12.0783	13.2485	34.5716	13.3811	22.7336	30.7518	23.932	29.0349	28.6478	22.6915	20.6208	16.5649	35.0011	16.3085	19.8951	39.9038	15.9067
GRMZM2G076029	chr3	28350840	28352354	332.684	221.168	162.728	67.0041	195.474	99.7148	270.286	135.579	119.082	155.715	288.952	236.499	101.667	209.444	185.656	165.925	157.173	89.9353	120.483	224.278	146.379
GRMZM2G151668	chr3	15160973	15162943	0	13.1872	0	15.8237	15.6198	1.62316	11.9089	2.46228	0	0	2.5178	0	0	0	0.165356	0	21.0762	0	10.3709	0	0
GRMZM5G863596	chr3	202942769	202965565	92.682	139.584	89.8023	128.531	108.188	152.697	160.485	92.359	128.635	141.488	138.516	82.7679	117.085	141.66	110.741	109.468	146.634	99.6125	124.433	113.323	52.7107
GRMZM5G839695	chr4	165100450	165100693	0	0	0	0	0	0	0	0	0	0	0	0	0	0	0	0	0	0	0	0	0
GRMZM2G142967	chr4	235909166	235909710	0	0	0	0	0	0	0	0	0	0	0	0	0	0	0	0	0	0	0	0	0
GRMZM2G380619	chr6	26221852	26229218	0	0	0	0	0	0	0	0	0	0	0	0	0	0	0	0	0	0	0	0	0
GRMZM5G884270	chr5	178073883	178086595	38.1451	52.1544	45.5019	51.602	59.783	46.2598	38.1934	68.8619	56.1769	66.0624	48.3716	95.0762	80.6472	44.7321	59.0099	54.5199	39.1114	44.8841	61.8264	44.0833	55.3062
GRMZM2G111066	chr9	104913630	104914928	0	0	0	0	0	0	0	0	0	13.8136	0	0	0	0	0	0	0	0	0	0	9.9198
GRMZM2G177391	chr1	87168763	87170163	0	0	0	0	0	0	0	3.50788	0	0	0	0	0	5.78083	0	0	0	0	0	0	0
GRMZM2G113396	chr2	206899425	206903057	54.2121	68.0254	42.6224	51.6146	75.7785	11.2186	63.448	50.8363	66.6136	76.5519	34.7439	92.5938	38.1188	40.5179	45.7609	45.0866	94.6429	78.9372	81.3634	35.0657	80.7813
AC204710.4_FG003	chr4	30479108	30479773	0	0	0	0	0	0	0	0	0	0	0	0	0	0	0	0	0	0	0	0	0
GRMZM5G860569	chr1	177422860	177423481	0	0	0	0	0	0	0	0	0	0	0	0	0	0	0	0	0	0	0	0	0
GRMZM2G447987	chr2	220854709	220859399	67.5238	40.5477	44.9934	72.1896	81.6408	64.9734	46.6906	54.7912	63.7656	57.9267	35.137	65.8361	71.0429	70.7192	46.3345	52.635	64.5395	44.6156	58.7797	70.1007	55.8542
GRMZM2G075148	chr2	213177836	213185654	76.4501	54.0388	27.1286	44.954	34.7293	77.4491	218.274	90.3116	68.7918	48.4723	151.344	143.589	54.2966	56.5274	64.6292	48.6477	122.386	70.567	121.916	97.824	41.5905
GRMZM2G157102	chr2	32271623	32275214	4.30544	6.02032	3.11145	2.45772	4.09044	11.1868	0	5.70284	10.3556	8.75169	7.02289	4.74416	6.60849	3.58793	3.03911	5.31475	3.24704	10.3727	3.764	7.52365	4.31107
GRMZM2G479746	chr6	32536876	32553298	81.4199	18.2525	84.1606	4.1157	31.9837	20.8408	14.4218	5.82145	3.84578	29.1989	13.3361	16.7627	24.0771	26.4083	138.169	22.5907	3.89843	41.1696	17.6907	14.1517	12.994
GRMZM2G137168	chr4	209546507	209547917	0	0	0	0	0	0	0	0	0	0	0	0	0	0	0	0	0	0	0	0	0
GRMZM2G136887	chr8	140378611	140386322	64.5887	66.463	48.1308	42.2786	43.1052	66.9775	45.9677	52.1043	59.1576	57.9416	74.8483	64.0239	38.1298	46.0721	50.6036	57.9545	65.3118	59.8354	56.0223	60.1318	59.9698
GRMZM2G348846	chr6	105537996	105540201	4.52934	5.13771	10.0702	5.87269	8.7806	6.42163	0	1.78578	2.61955	0	7.88949	6.97155	0	7.07408	2.32857	5.725	4.24605	5.90494	2.74942	0	3.63001
GRMZM2G032648	chr5	24609082	24611412	21.615	29.525	24.3506	27.8069	28.2023	27.7112	26.7424	27.4728	24.3157	19.5497	38.18	16.2062	20.5389	24.7291	17.3358	29.3897	23.0921	22.275	33.7184	17.0097	36.3209
GRMZM2G142776	chr8	141610327	141611548	8.21851	0	2.80001	4.91307	0	4.37476	0	4.19941	5.19651	4.69387	4.47845	0	0	6.24229	6.9634	8.23647	4.16413	0	5.89634	0	1.88045
GRMZM2G089193	chr7	8928205	8930566	52.1452	61.5225	47.9572	44.5291	45.1784	70.4772	70.7237	51.7952	42.2383	83.3744	51.1563	64.3847	38.1962	62.3412	46.0726	60.7555	50.994	52.4358	56.3684	62.7694	65.7072
GRMZM2G019207	chr5	17066432	17067213	0	0	0	0	0	0	0	0	0	0	0	0	0	0	0	0	0	0	0	0	0
GRMZM2G118534	chr4	16628607	16631296	41.7792	43.1707	0.39372	0	0.706567	1.85205	1.40276	0	0	0	1.86532	3.03653	0	41.8635	0.0537293	0.985143	29.9795	2.03846	20.404	34.8602	48.9947
GRMZM2G149683	chr8	145230330	145231761	0	0	0	0	0	0	0	3.14304	4.09007	0	0	0	0	0	2.84321	0	0	0	0	0	0
GRMZM2G090087	chr6	161454530	161462066	270.415	320.642	290.015	264.771	358.792	278.787	271.019	264.624	286.621	355.129	351.723	206.73	314.523	292.184	295.944	371.707	228.841	244.33	239.222	326.591	296.844
GRMZM2G039463	chr5	124242906	124245659	6.35002	19.6959	7.90272	12.9568	6.41281	6.5189	0	9.2982	7.21406	10.2318	8.49546	12.2402	0	2.6252	32.0716	13.2104	27.0349	21.3477	7.49493	14.5579	27.8259
GRMZM2G352618	chr6	128455029	128455900	194.09	280.289	97.3484	84.0745	69.3375	45.0221	201.365	105.921	18.4254	110.043	262.743	150.856	34.8562	113.943	69.1301	110.115	179.062	188.571	181.289	207.863	215.612
GRMZM2G702909	chr2	6168591	6168927	0	0	0	0	0	0	0	0	0	0	0	0	0	0	0	0	0	0	0	0	0
GRMZM2G123820	chr6	106047283	106048952	0	0.435676	0.158172	0	0	0	0	0	0	0	0	0	0	0.230633	0	0	0.881109	0.606559	0	0	0
GRMZM2G351990	chr8	141648490	141651599	167.824	39.4379	130.146	136.366	86.6861	158.382	133.179	139.359	102.99	125.616	123.097	147.475	108.435	78.4534	163.355	149.35	109.238	169.26	118.468	107.818	134.414
GRMZM2G328795	chr3	169113609	169117248	0	0	10.3984	7.45479	0	0	0	3.18913	9.54919	8.4725	3.5731	0	0	1.54716	3.2957	0	10.7223	9.47872	0	9.35791	9.46945
GRMZM5G859444	chr5	165270759	165272399	0	0	0	0	0	0	0	0	0	0	0	0	0	0	0	0	0	0	0	0	0
GRMZM2G111132	chr3	221923217	221923427	0	0	0	0	0	0	0	0	0	0	31.7854	0	0	39.7892	0	0	0	0	34.4371	0	0
GRMZM2G363805	chr8	73740636	73741911	0	0	0	0	0	0	0	0	0	0	0	0	0	0	0	0	0	0	0	0	0
GRMZM2G004140	chr5	1681774	1686570	30.0869	51.0971	61.3296	73.5133	59.5527	64.8535	56.1003	63.7748	62.5793	58.9376	94.8209	75.1812	70.7446	61.576	102.375	82.2596	68.7983	70.9722	60.2764	55.8669	63.159
GRMZM2G085035	chr8	166624184	166625981	7.78262	10.3229	7.12425	7.01654	5.28934	5.40484	7.0816	9.03048	6.20975	8.11385	3.60122	5.88846	0	3.13761	6.46269	4.57937	5.42698	5.31832	4.62877	6.88705	5.51737
GRMZM2G318633	chr5	155524466	155526667	56.0805	104.176	94.1796	46.4205	157.773	58.2481	130.286	49.9714	90.1758	75.0541	96.8648	218.705	44.9933	84.3509	262.736	215.416	123.664	119.991	53.9105	183.452	137.427
GRMZM2G032225	chr2	62290229	62291455	0	171.119	235.109	4.01479	13.6245	144.592	10.1766	173.696	17.2188	71.4389	41.3268	0	0	58.9401	53.2542	250.534	215.785	24.9495	277.286	18.6489	6.45299
GRMZM2G078926	chr3	209543593	209552791	14.059	38.7595	35.6398	40.1154	32.6825	56.7478	40.1633	28.3573	23.6126	12.9271	29.3616	38.1559	52.8463	36.9035	40.8254	21.051	36.3548	26.8159	19.0265	36.4293	56.6196
GRMZM2G045294	chr4	168739233	168740533	73.3956	72.659	82.7	90.9196	62.1237	68.6677	72.2199	76.0316	68.2275	54.292	91.0582	133.976	38.6397	85.9077	73.5744	85.9344	133.652	92.0715	84.9152	52.894	99.8134
AC198781.3_FG002	chr10	5279772	5279997	0	0	0	0	0	0	0	0	0	0	0	0	0	0	0	0	0	0	0	0	0
GRMZM2G008106	chr4	201732484	201734182	152.563	174.986	123.011	65.8611	118.196	89.7982	110.534	139.595	80.5769	139.504	72.0134	100.069	37.503	122.844	114.318	52.1521	95.1887	108.951	101.454	113.98	138.916
GRMZM2G365035	chr2	157290492	157298357	89.5529	173.722	150.705	125.17	135.832	121.199	91.5361	122.582	125.62	124.231	90.3893	116.218	112.91	111.206	130.739	107.583	90.3444	168.068	133.814	115.858	200.474
GRMZM2G012213	chr5	204315353	204318116	12.6049	16.5739	19.2464	21.9005	6.40504	23.5703	22.6374	13.922	16.5373	18.7349	23.2394	28.7569	21.213	16.9686	17.0638	19.7103	26.5279	18.4649	12.4618	18.7016	28.3477
GRMZM5G896916	chr9	147140988	147151193	32.8409	26.7595	25.9049	40.7358	30.1717	36.0664	59.1514	51.7448	40.5922	37.0359	33.2914	46.2369	28.1616	34.4392	47.3805	30.2449	35.0867	72.5222	43.9378	32.6036	60.6872
GRMZM2G176394	chr2	233597233	233599119	183.067	244.069	207.117	98.8108	78.5483	164.316	93.5029	123.366	61.4829	152.975	132.783	79.0599	142.749	161.611	64.9042	121.636	124.861	140.916	139.559	181.206	230.744
GRMZM2G421682	chr2	201798744	201799559	0	0	0	0	0	0	0	0	0	0	0	0	0	0	0	0	0	0	0	0	0
GRMZM5G819919	chr10	2842741	2846127	15.9407	24.105	19.9405	38.3035	25.6374	78.8635	17.1878	174.675	19.0761	1.70016	48.1498	4.90144	25.3211	42.4558	31.3738	53.5651	155.866	105.596	126.639	2.15913	181.702
GRMZM2G028700	chr1	174634732	174645383	95.028	93.5663	76.5786	96.3555	73.7888	97.8776	79.0336	79.8942	81.8272	85.8636	94.8133	73.2812	90.377	89.8039	90.7533	83.0133	86.7802	84.8284	98.0867	77.3561	93.6455
AC193500.3_FG003	chr1	1780237	1781389	12.8236	13.4307	17.6689	30.802	20.5984	12.2602	4.21463	9.8884	22.7252	14.5124	7.86179	17.8947	0	8.12865	23.9866	47.7819	3.71848	8.2696	7.79435	9.89825	11.1683
GRMZM2G444029	chr3	65708891	65713393	114.253	165.49	98.271	191.29	141.802	95.1385	148.656	153.688	77.0814	168.999	125.059	117.817	94.9477	133.393	164.063	96.9317	164.26	109.538	224.791	128.732	162.71
GRMZM2G311036	chr1	66304871	66306978	165.679	342.588	353.613	154.853	137.758	295.151	47.1196	183.375	141.931	187.164	134.003	132.499	143.949	250.232	99.2765	147.908	188.444	442.692	144.221	215.445	211.358
GRMZM2G401009	chr3	175936708	175937434	0	16.7448	28.0249	10.5628	17.0367	9.11327	0	6.47798	18.9474	0	25.1713	17.9899	21.8615	7.17693	0	18.7771	22.2701	28.9618	14.5101	0	15.5458
GRMZM2G167253	chr3	172374934	172378448	26.2799	30.5577	26.8115	26.8373	29.6491	30.7145	49.9031	35.623	65.5044	34.8594	16.6374	20.8288	37.3083	39.3336	39.5852	32.0351	23.4731	31.2679	23.3026	41.6154	43.4285
GRMZM2G131597	chr2	110154595	110162360	16.0535	15.1528	18.8595	39.0643	49.3782	18.757	26.5638	23.3153	27.432	37.3299	17.0303	18.5935	22.0404	31.331	21.5647	18.7445	26.2617	17.6039	17.967	23.6363	22.3313
GRMZM2G103672	chr1	251136915	251138525	17.9724	13.4818	11.4929	17.1679	0	20.6827	20.4182	24.0844	15.2741	13.9753	15.3018	0	14.4432	17.8171	12.6397	18.9831	11.1892	8.83635	8.87415	20.6195	8.78401
GRMZM2G168552	chr8	157100231	157101209	3740.57	3093.38	4623.52	1915.03	3140.41	3088.21	3400.81	4206.83	2647.01	2025	2285.25	1656.26	2974.17	4923.71	2931.97	2909.74	4342.36	1296.21	5336.93	1668.12	2162.76
GRMZM2G391487	chr5	212684728	212687940	0	0	0	0	0	0	0	0	0	0	0	0	0	0	0	0	0	0	0	0	0
GRMZM2G027100	chr3	2748193	2748460	0	0	0	0	0	0	0	0	0	0	0	0	0	0	0	0	0	0	0	0	0
GRMZM2G087507	chr2	187627333	187631028	9.33971	18.6204	14.1501	111.79	48.9428	21.0549	9.30875	9.28504	42.1117	5.37418	38.9805	0	39.0821	40.1153	40.6836	5.27858	11.2181	67.4777	14.3157	63.8548	8.90914
GRMZM2G106622	chr10	14302292	14305526	16.184	24.918	19.8085	45.0047	109.977	5.11817	29.2873	26.2695	50.2561	27.0105	19.0309	29.8104	23.928	25.2728	92.5426	43.5258	37.8519	83.3639	24.4253	18.4098	23.7018
GRMZM2G351469	chr7	163608525	163609141	115.844	26.3572	186.417	28.8881	0	314.414	346.898	178.814	195.192	390.49	192.543	29.3721	150.495	0	0	38.885	499.214	229.084	32.0069	311.696	266.825
GRMZM2G140755	chr7	175201007	175201756	0	0	0	0	0	0	0	0	0	0	0	0	0	0	0	0	0	0	0	0	0
GRMZM2G469898	chr9	64028901	64031969	544.787	586.775	495.849	565.406	404.051	590.602	453.526	595.763	517.337	545.325	511.369	407.589	416.524	506.467	669.652	425.84	559.883	509.491	470.627	507.572	683.632
GRMZM2G070837	chr8	146152363	146154346	0	0	0	0	0	0	0	0	0	0	0	0	0	0	0	0	3.37629	0	0	0	0
GRMZM5G803318	chr10	4592171	4594686	238.869	260.455	302.559	210.433	509.121	231.025	113.331	238.887	365.156	158.346	244.223	140.368	306.973	228.775	429.483	184.377	169.634	208.427	228.8	190.116	234.142
AC195214.3_FG007	chr2	216565440	216565914	0	0	0	0	0	0	0	0	0	0	0	0	0	0	0	0	0	0	0	0	0
GRMZM2G329484	chr1	267417235	267418580	8.54475	6.24683	2.13225	7.7339	6.70265	6.75365	7.72797	13.3833	6.56497	8.99721	1.78338	8.78753	12.375	5.33502	5.12397	2.84938	6.50394	0	3.41924	9.65099	8.62148
GRMZM2G062777	chr1	158329690	158336220	0	22.1322	24.0356	37.1376	0	0	0	0	23.2697	0	24.6872	0	0	0	0	0	35.1956	30.3191	24.2935	0	33.0281
GRMZM2G148937	chr5	1543676	1546723	38.3182	48.4048	51.9581	39.9239	21.309	26.9618	40.927	41.8257	40.612	28.0649	30.3549	29.9616	24.4991	37.7884	29.4629	37.9504	44.5353	28.8503	53.6152	24.0898	31.3216
GRMZM2G154558	chr2	87656246	87657889	4.54677	7.69359	17.5013	5.99793	0	7.0304	8.63618	8.82461	11.8668	10.8386	4.21237	13.5704	7.62161	6.16753	4.26704	11.7679	9.1913	5.33432	7.34542	0	7.05445
GRMZM5G879749	chr5	213533997	213539571	29.6113	39.0898	40.7298	55.157	25.1164	35.5673	20.6043	43.1212	55.2609	34.5979	25.2479	30.7223	15.0771	38.8774	46.2683	29.4953	35.3114	17.9467	47.1295	15.025	28.5261
AC217978.3_FG001	chr10	143085208	143085610	0	0	0	0	0	0	0	4.16333	0	0	0	0	0	0	0	0	0	0	0	0	0
GRMZM2G121221	chr5	4038553	4040410	614.934	789.127	724.89	704.524	585.022	639.529	491.005	597.583	781.161	627.006	494.808	500.637	573.457	477.761	596.475	735.643	484.926	674.637	814.265	634.25	507.226
AC194480.3_FG001	chr1	172297519	172297765	0	0	0	0	0	0	0	0	0	0	0	0	0	0	0	0	0	0	0	0	0
GRMZM2G366392	chr4	136066790	136069510	410.386	442.658	477.762	552.788	249.248	373.257	325.43	367.424	452.886	387.335	605.588	206.35	789.753	548.023	418.427	271.406	240.023	232.554	246.736	449.078	296.484
AC212286.3_FG007	chr5	177973749	177974790	0	0	0	0	0	0	0	0	0	0	0	0	0	0	0	0	0	0	0	0	0
GRMZM5G872499	chr5	215062047	215063124	417.45	454.703	511.633	673.677	191.609	358.215	344.966	370.545	241.732	219.315	181.791	274.494	267.548	346.388	546.854	352.17	442.593	417.252	431.035	221.334	415.898
AC217358.3_FG007	chr1	296961160	296962159	0	0	0	0	0	0	0	0	0	0	0	0	0	0	0	0	0	0	0	0	4.12852
GRMZM5G866918	chr7	167716123	167732399	52.1866	45.896	58.1546	69.8368	53.3563	61.6555	46.9059	69.6827	60.2629	45.8684	56.3988	55.2014	57.6572	55.0885	48.2779	57.8151	47.5419	44.2316	54.2869	42.5626	76.5851
GRMZM2G101818	chr4	236700679	236701697	323.566	523.416	386.576	314.753	617.519	303.43	42.8756	287.282	223.893	391.159	441.948	255.997	213.902	265.187	308.621	327.209	163.635	298.837	367.797	324.01	350.019
GRMZM2G122447	chr9	100304256	100305904	6.8187	8.28234	11.6132	0	0	6.07488	0	12.7818	4.5619	0	0	0	0	0	1.11739	0	0	4.74603	0	0	5.73583
GRMZM2G093632	chr2	10553674	10555703	6.33744	3.3472	13.0784	0	0	5.93421	0	4.94054	0	0	5.75417	9.64183	0	6.28736	5.13276	5.89361	0	0	2.82272	0	3.05194
GRMZM2G430500	chr2	14891651	14892023	0	0	0	0	0	0	0	0	0	0	0	0	0	0	0	0	0	0	0	0	0
GRMZM2G008341	chr4	29922222	29923189	0	0	0	0	0	0	0	0	0	0	0	0	0	0	0	0	0	0	0	0	0
GRMZM2G424020	chr1	14113782	14117401	3.21431	2.92065	0	0	0	3.40028	4.29832	0	1.80722	2.04095	3.66	0	3.91021	0	4.70432	0	3.25769	0	9.28132	7.44699	3.06903
GRMZM2G412234	chr8	19550660	19556710	73.5816	79.7346	69.4368	84.0967	82.2778	71.5726	91.4969	93.0316	110.615	83.5835	103.739	100.261	78.411	91.1963	79.0524	93.0644	97.9772	80.258	88.9331	107.34	92.6177
GRMZM2G445634	chr1	16792358	16793281	0	21.3191	61.1938	31.8433	170.797	29.0401	14.847	29.1843	21.3344	69.1696	24.4731	16.1174	18.2516	23.4344	36.7204	39.9515	29.7369	63.5067	36.069	38.3909	86.3374
AC211474.3_FG006	chr8	16747526	16754983	5.43372	5.56169	22.5452	0	4.59051	4.46806	5.27449	16.2474	18.4726	6.25629	3.54265	0	0	5.85984	4.6301	0	0	0	2.24657	5.01875	3.28652
GRMZM2G318292	chr7	54327971	54330225	3.18262	4.22567	4.25167	2.05213	0	3.32323	1.8186	2.7207	6.20423	4.23614	7.07248	2.84817	6.5043	2.35425	2.88468	5.54642	4.90926	3.63408	1.51538	0	7.81863
GRMZM2G073044	chr8	123469337	123470737	25.0333	20.7702	29.7161	32.5919	37.5183	42.3999	32.7407	24.0177	33.2908	25.0275	38.6958	38.1159	23.9777	18.0027	22.7189	36.0946	32.7455	41.4252	28.2566	15.3026	21.0031
GRMZM2G143608	chr3	229739852	229741644	0	0	0	3.70001	0	3.0455	0	2.93647	0	0	0	0	0	0	0	0	0	0	3.63946	0	0
GRMZM2G061419	chr8	163368912	163375102	215.322	214.499	192.769	230.769	121.37	211.612	185.827	256.086	158.757	129.586	244.964	138.424	175.27	233.27	152.771	197.32	228.515	146.279	194.236	239.425	156.832
GRMZM2G323413	chr9	20179809	20181423	0	5.2205	0	2.88605	0	6.10102	0	0	2.8056	0	0	6.88179	0	0	2.99747	2.789	0	0	0	0	5.91999
GRMZM2G377341	chr5	38567211	38578529	369.323	455.512	346.481	622.33	440.308	627.28	613.394	463.071	514.294	369.204	488.312	464.316	514.173	509.493	414.081	444.183	468.208	402.02	536.82	395.283	553.968
GRMZM2G070780	chr10	81957134	81959818	41.4524	55.4998	53.9737	44.7121	67.7378	54.1202	33.8675	38.8552	49.0974	65.1436	43.6194	38.1616	43.3704	44.3253	70.3513	39.3453	46.3847	77.232	74.5025	63.1428	63.5007
GRMZM2G371651	chr8	40812668	40813624	1.07187	0.120563	0.124268	0.127063	1.38889	0.229867	0	0.589226	0	0	0	0	0	0	0.219674	2.1173	0	0	0	0	0
GRMZM2G092483	chr1	10820297	10821493	24.0708	18.1615	44.8522	11.8577	0	17.2243	0	19.1136	13.2776	7.07873	0	17.4836	0	6.74448	5.14742	38.5605	0	17.2713	11.1494	0	16.0133
GRMZM5G844562	chr5	98993015	98997371	1002.05	1049.24	1151.91	979.122	893.213	1017.04	735.567	975.353	951.951	856.414	728.805	872.805	881.902	903.973	1161.17	962.897	999.663	1169.76	1212.26	759.438	1060.4
GRMZM2G088305	chr7	11284070	11288350	0	0	0	0	0	0	0	0	0	0	0	0	0	0	0	0	0	0	0	0	0
GRMZM2G122362	chr3	211122123	211127716	22.0081	29.2819	27.0958	28.9754	29.4545	27.5898	24.7082	28.6768	31.3487	33.3156	27.3148	32.3452	30.6075	32.0552	23.3692	30.2066	29.083	26.3575	33.9292	21.3201	31.1028
GRMZM2G044382	chr10	120823845	120828918	63.9323	60.2886	70.2201	81.9791	44.0531	65.9197	72.819	65.3346	85.1311	67.3417	57.7205	65.354	68.7203	45.2516	72.4224	55.1673	62.3624	61.0556	51.6867	55.2631	50.5862
GRMZM2G015989	chr4	240742462	240747734	697.998	673.229	683.026	713.084	577.341	754.246	550.39	738.801	718.341	566.882	570.04	581.023	576.2	686.368	559.344	687.16	486.513	547.165	441.206	519.364	620.696
AC203909.3_FG007	chr4	32164014	32165649	0	0	0	0	0	0	0	0	0	0	0	0	0	0	0	0	0	0	0	0	0
GRMZM2G170969	chr8	162756042	162756672	441.634	997.22	705.434	361.228	130.459	401.76	295.337	363.346	456.768	356.034	111.106	237.849	442.291	378.096	234.176	562.215	138.481	336.463	122.264	191.743	422.329
GRMZM2G034840	chr2	3338227	3344486	8.54492	9.27966	7.76668	12.2622	10.2539	8.51128	5.28372	9.58324	10.0559	10.8471	9.977	3.68082	8.23313	11.9026	10.5163	9.59865	7.68382	8.25823	8.37633	12.7129	15.28
GRMZM2G333916	chr7	11127928	11134326	87.3536	78.3153	71.5324	127.516	76.1858	101.783	86.1858	97.2359	83.4937	72.6485	81.077	100.088	66.476	103.131	67.9636	83.5524	86.6464	69.6284	68.9563	77.5054	78.3691
GRMZM2G390236	chr3	25309306	25310108	0	7.73351	16.9463	0	0	5.62039	0	8.20485	8.88768	0	12.7133	0	0	7.88347	0	0	0	0	0	0	0
GRMZM2G082448	chr2	214210523	214215896	107.913	136.222	156.534	183.654	97.0006	146.633	111.361	154.878	118.805	104.988	94.9249	150.326	124.456	89.3526	120.178	165.671	118.924	127.839	112.375	137.07	104.467
GRMZM2G029974	chr8	74131287	74133362	37.2061	33.754	29.5454	57.365	40.5885	34.8074	39.8606	36.9473	31.4052	24.165	28.5537	36.9375	19.1579	25.9637	19.1996	32.8164	23.3029	41.929	23.3924	32.2719	31.9897
GRMZM2G436344	chr9	101771086	101774624	3.93216	2.5969	2.68239	3.18052	3.02293	1.29857	3.84706	2.5182	3.38508	3.41592	3.41693	3.82084	3.47526	2.94581	2.71279	3.25561	6.34099	2.28868	2.51079	3.14103	1.60011
GRMZM2G329334	chr7	117093977	117094472	0	0	2.47953	2.59779	0	0	0	0	0	0	0	0	0	0	0	0	0	0	0	0	0
GRMZM2G181227	chr10	19475271	19481312	300.661	122.756	388.586	156.168	357.318	232.582	280.753	92.0353	145.759	530.909	329.705	462.452	271.323	205.893	177.092	226.776	604.435	388.362	363.548	262.133	162.435
GRMZM2G117405	chr8	164558358	164563720	0	2.61333	4.61576	7.62541	0	3.83961	0	5.69397	5.27209	0	3.76917	0	0	4.76626	5.15407	9.15766	0	8.50559	6.27841	0	3.50104
GRMZM2G110447	chr4	160233886	160235377	4.19457	2.48789	4.61318	0	4.80965	0	0	2.44382	0	0	3.06791	0	0	0	1.397	0	0	0	0	7.89317	3.54899
GRMZM2G306376	chr2	67755205	67758000	0	0	0	0	0	0	0	0	0	0	0	0	0	0	0	0	0	0	0	0	0
GRMZM2G010105	chr8	164356752	164363486	26.7525	35.484	26.8987	22.8678	16.7534	30.1568	28.0952	40.2364	29.8926	19.5331	30.2148	19.7936	15.1288	30.0312	30.0133	25.2407	28.3022	14.5451	32.2021	30.9728	24.3392
GRMZM2G136803	chr7	171699374	171703593	306.642	378.528	271.813	325.033	302.786	421.348	263.073	407.575	329.167	283.851	360.561	215.417	270.965	356.59	212.227	186.941	277.415	177.358	238.736	245.626	207.66
GRMZM2G473367	chr6	61179282	61184400	90.8402	82.8047	83.9093	90.6105	114.841	98.5941	82.5277	89.4952	93.2437	94.433	116.395	79.9954	79.1972	83.1595	122.362	78.8824	101.255	107.633	101.22	94.7487	102.51
GRMZM2G701704	chr3	125577778	125577994	0	0	0	7.04123	0	0	0	0	0	0	0	0	0	0	0	0	0	0	0	0	0
GRMZM2G163283	chr6	165561338	165562060	0	0	0	0	0	0	0	0	0	0	0	0	0	0	3.52912	0	0	0	6.24467	0	0
GRMZM2G039586	chr9	80170946	80173134	147.129	218.282	156.784	168.97	142.611	195.524	147.947	171.611	261.772	84.7459	200.319	151.66	160.959	220.589	182.361	215.563	159.276	182.002	179.59	113.845	186.77
GRMZM2G017752	chr10	140289207	140290291	0	0	0	0	0	0	0	0	0	0	0	0	0	0	0	0	0	0	0	0	0
GRMZM2G030494	chr1	196338967	196340855	128.236	400.756	281.491	506.264	312.342	413.613	458.791	252.423	320.627	251.546	406.978	354.472	491.295	422.161	324.889	455.214	310.43	315.519	399.707	332.287	634.224
GRMZM2G075668	chr10	120264007	120265126	0	0	0	0	0	0	0	0	0	0	0	0	0	0	0	0	0	0	0	0	0
GRMZM2G026391	chr10	133816855	133820703	54.1019	75.0573	66.8578	73.5893	92.1619	44.8075	51.8233	58.0398	81.2677	63.9504	72.7662	69.6058	70.5514	59.1909	55.1215	62.7079	97.2681	80.0427	74.9906	60.864	56.6938
GRMZM2G009575	chr7	69786314	69790638	52.2057	57.2439	46.9703	54.2296	55.0441	63.7585	49.8619	59.3336	58.4958	56.9635	44.6174	49.4171	53.5754	52.8114	59.6678	60.6913	70.1127	60.1158	60.5238	59.3958	70.3293
GRMZM5G808811	chr6	60978926	60981565	205.895	207.782	244.918	250.943	265.08	253.807	237.93	226.903	256.178	215.128	216.775	127.512	222.218	203.432	294.251	228.452	204.782	185.616	145.336	174.256	227.188
GRMZM2G093858	chr10	83547655	83551738	33.9953	26.0721	27.1549	19.8669	12.9717	27.8167	22.7548	19.4339	21.6544	25.7221	14.0858	28.4749	25.9608	13.4291	29.6472	22.6688	16.4689	34.0574	22.8618	19.0318	23.8007
AC187096.5_FG001	chr8	20922671	20927879	0	0	0	0	0	0	0	0	0	0	0	0	0	14.7169	0	0	0	0	0	0	0
GRMZM2G161335	chr1	180306605	180308510	912.284	1670.92	1560.28	1194.37	1714.11	1652.43	1066.85	1043.52	1432.32	1076.9	1103.29	967.823	1221.54	1245.8	1468.65	1488.59	1146.04	1144.73	1199.66	841.936	1619.72
GRMZM2G110220	chr9	2258592	2259952	15.9011	16.0503	20.8934	10.1409	16.7729	25.8611	17.7288	21.4506	27.848	18.9611	11.5663	12.9893	26.0706	14.7948	8.46576	25.8179	6.69119	25.0567	11.6138	18.1436	23.6842
GRMZM2G086587	chr5	100010948	100014258	76.3716	51.553	56.5626	41.3006	38.6483	51.9283	58.641	62.6464	29.9214	61.0629	67.8818	47.7866	25.8269	64.7291	29.6928	48.5927	63.4731	43.7763	49.2937	51.4887	53.9481
GRMZM2G324248	chr9	93146380	93147177	58.9766	52.1081	44.9342	46.5342	34.3306	39.905	76.2423	49.7115	36.417	80.245	69.2696	56.3871	31.7289	55.2662	23.7568	47.5474	55.0276	31.5178	51.371	45.8982	55.551
AC234575.1_FG003	chr6	132657598	132658828	37.0068	65.6738	45.9881	30.904	43.7926	36.1824	29.8454	38.95	65.0732	26.3248	24.5317	27.7738	31.327	43.251	51.0112	57.4957	35.9243	59.4988	25.8601	40.2103	47.7037
AC190589.2_FG002	chr3	138546683	138547370	0	0	0	0	0	0	0	0	0	0	0	0	0	0	0	0	0	0	0	0	0
GRMZM2G061969	chr8	17388791	17393555	295.288	288.392	320.187	295.526	349.239	316.347	327.481	299.284	422.13	342.033	376.569	289.687	339.958	399.403	424.029	340.366	260.47	225.747	298.736	310.705	334.29
GRMZM2G018689	chr10	127265136	127268022	60.4988	82.082	77.0715	84.1612	73.8815	90.2894	72.0366	84.2001	88.9904	78.5925	61.8857	75.3377	102.105	80.8086	70.9025	78.0626	70.1289	68.3831	61.6784	80.0049	76.5805
GRMZM2G025875	chr2	37572940	37573498	0	0	0	0	0	0	0	0	0	0	0	0	0	0	0	0	0	0	0	0	0
GRMZM5G805285	chr1	211396493	211397271	0	0	0	0	0	0	0	0	0	0	0	0	0	0	0	0	0	0	0	0	0
GRMZM2G347983	chr3	134293603	134295139	0	0	0	0	0	0	0	0	0	0	0	0	0	0	2.48508	0	0	0	0	0	0
GRMZM2G149428	chr2	219389301	219391782	11144.1	9604.99	9724.32	11720.4	9711.36	11353.5	13636	9711.93	11292.7	8237.09	13712.9	7643.59	9280.39	14565	8158.53	10580.6	10481.9	6727.07	13581.6	7627.07	10039.9
GRMZM2G701109	chr6	129542920	129543499	0	8.3336	7.24935	0	0	10.1121	0	0	0	0	0	0	0	0	12.7122	0	0	0	10.4329	0	0
GRMZM2G095895	chr6	119200176	119200897	0	0	0	0	0	0	0	0	0	0	0	0	0	0	0	0	0	0	0	0	0
GRMZM2G138920	chr10	148323854	148327356	24.1737	43.7267	25.5906	47.8965	42.0865	55.9949	48.3985	75.4005	45.4195	43.1674	32.4413	55.3061	36.5727	86.9829	38.6631	55.5184	35.3314	33.0525	34.2022	63.0303	76.2793
GRMZM2G056896	chrUNKNOWN	4878107	4878738	0	0	0	0	0	0	0	0	0	0	0	0	0	0	0	0	0	0	0	0	0
GRMZM2G010433	chr6	113048719	113050633	11.1234	19.6289	24.3149	30.6319	29.8133	17.1115	11.6101	30.8053	22.6597	0	13.8885	21.0957	12.3321	36.7298	17.6009	30.4487	24.138	15.8552	24.7316	0	26.2735
GRMZM2G098884	chr4	30932066	30947336	115.175	118.758	97.7276	118.92	105.974	112.616	141.393	146.463	114.892	119.949	134.874	103.957	107.984	138.896	99.4115	105.911	138.083	82.8522	113.779	111.657	114.419
GRMZM2G067183	chr5	199441287	199443232	205.018	211.824	243.138	197.157	191.496	191.068	139.018	175.154	157.826	239.46	208.062	214.044	178.181	249.944	137.317	203.812	257.071	203.327	202.394	206.216	217.823
GRMZM2G513287	chr1	277362805	277363084	0	0	0	0	0	0	0	0	0	0	0	0	0	0	0	0	0	0	0	0	0
GRMZM2G703415	chr2	231331215	231337987	88.8288	89.8839	77.2681	100.789	95.5418	97.3258	102.486	108.524	103.87	83.486	94.2651	110.337	88.9931	93.9467	97.1669	94.8968	106.519	85.1888	84.5694	95.3799	95.5927
GRMZM2G437683	chr1	102891201	102894211	9.07418	8.15104	10.0257	4.79591	2.58473	7.90292	0	4.22866	4.37621	3.83511	4.07711	4.88248	0	3.72856	3.26143	6.55329	0	3.6215	3.51648	3.48668	6.44749
GRMZM2G032955	chr6	132083508	132084494	41.7601	30.8249	39.4963	34.8979	44.3307	31.4143	50.5086	33.5488	28.3843	24.3678	28.8918	41.5161	29.4778	35.7154	13.2257	36.2501	27.0075	50.9677	46.1152	53.7787	50.5402
GRMZM5G832490	chr3	1255012	1255634	0.379435	0.205071	0.338568	0	0	0.401759	0	0.487231	0	0.435308	0.89842	0	0	0	0.119523	0.302747	0	0	0	0	0
GRMZM2G536768	chr10	23993086	23993847	0	11.7358	2.50803	5.31796	5.19617	8.25694	6.27893	9.99274	3.53457	0	14.5684	0	18.6535	0	3.21669	5.22115	15.7715	17.3404	16.7681	0	14.0998
GRMZM2G467169	chr9	12103631	12110868	187.604	208.607	184.303	225.739	184.614	223.948	207.326	213.895	218.473	202.807	186.786	177.471	170.869	200.797	202.803	221.778	205.033	171.757	230.385	190.489	226.48
GRMZM2G024622	chr2	200284064	200301275	8.39914	5.75115	3.6861	7.53476	10.5081	7.07216	6.58781	5.03775	13.9885	5.46668	18.8988	2.92756	0	3.40448	9.25384	5.68387	8.51159	3.93136	10.0752	11.6411	4.04426
GRMZM2G043348	chr5	56215095	56218883	7.79752	10.865	15.8177	25.2026	29.9465	8.14472	7.48964	22.0848	23.4963	16.1514	14.4778	11.7602	13.9493	6.40611	17.8816	16.1908	8.10274	21.7737	14.0006	6.80461	12.3962
GRMZM2G106631	chr8	21036283	21044005	1.08072	2.13063	0.689175	2.88141	0.832897	0.924074	1.57673	1.34726	1.99252	1.14689	2.93454	1.23998	0.260965	1.60238	1.00874	0.691602	1.266	0.747476	2.33765	2.44024	1.32141
GRMZM2G106680	chr5	182909184	182911740	31.1394	47.4393	39.9153	57.9488	79.2864	83.4842	78.1287	44.2492	42.9599	49.504	105.111	61.2909	88.6271	85.4091	51.5113	67.475	63.2064	54.6828	43.3783	77.6844	69.1003
GRMZM2G113165	chr1	199106033	199109068	3.58761	12.4994	12.7324	0	0	6.01284	0	2.01282	0	0	0	0	0	2.95008	3.61228	0	26.2293	5.32382	4.76641	0	3.20919
GRMZM2G047867	chr9	65957729	65962751	42.4894	14.378	214.115	195.404	100.659	125.886	210.711	228.417	300.578	57.4169	51.4532	149.197	185.969	243.808	18.2885	267.237	70.2015	75.0449	82.3228	110.923	78.5921
GRMZM2G054833	chr5	76632567	76634549	0	0	0	0	0	0	0	0	0	0	0	0	0	0	0	0	0	0	0	0	3.30348
GRMZM2G168330	chr7	147132516	147134161	1406.61	1864.65	1792.32	1767.25	1420.88	1539.41	1277.67	2040.07	1620.77	1128.01	1197.46	786.172	1700.89	1540.56	1601.73	1449.87	1177.97	1174.83	1310.28	913.836	1644.71
GRMZM2G010065	chr8	159991886	159996521	28.8175	23.6854	27.2984	28.4794	23.0043	22.3012	21.5331	22.4723	28.2441	38.7448	28.4413	35.4425	15.8838	23.7704	29.487	23.6825	30.1408	22.715	26.1163	29.2756	30.049
GRMZM2G435380	chr9	49132684	49134663	0	0	0	0	0	0	0	0	0	0	0	0	0	0	0	0	0	0	0	0	0
GRMZM2G177915	chr5	49900291	49900834	0	0	0	0	0	0	0	0	0	0	0	0	0	0	0	0	0	0	0	0	0
GRMZM2G405090	chr5	27767780	27768798	36.9711	89.5318	47.6396	46.661	89.3429	43.0872	26.491	40.3094	71.7742	70.2254	38.5189	26.2728	43.9142	43.217	134.389	48.045	39.5489	65.8158	70.0276	60.7296	114.368
AC207397.3_FG001	chr4	108812799	108815545	0	0	0	0	0	0	0	0	0	0	0	0	0	0	0	0	0	0	0	0	0
AC198979.4_FG009	chr1	10989530	10989923	0	0	0	0	0	0	0	0	0	0	0	0	0	0	0	0	0	0	0	0	0
AC213099.3_FG002	chr1	62887598	62890415	23.8557	35.5412	31.4718	25.2624	29.0938	29.4639	25.7891	18.8608	35.9607	29.4243	0	20.0547	37.598	22.76	22.7996	29.9132	20.0682	34.5758	26.1459	19.6678	26.0512
GRMZM2G080263	chr8	132965722	132966675	0	0	0	0	0	0	0	0	0	0	0	0	0	0	0	0	0	0	0	0	0
GRMZM2G330453	chr1	259817079	259825409	53.1499	43.822	30.0951	57.2652	36.9893	61.8723	69.9571	49.5164	43.7058	41.4402	34.9551	42.2915	52.0953	67.7516	43.8921	38.3276	47.3142	36.3039	54.9041	45.1464	53.0241
GRMZM2G466517	chr9	61250491	61252155	5.13514	1.60849	2.70313	2.95671	0	2.32994	4.99123	4.63488	2.34937	3.42173	4.10056	7.1036	0	1.67165	1.30857	4.47166	4.75135	0	2.40706	0	5.77591
GRMZM2G131683	chr1	230186288	230191174	17.9857	7.21741	13.1116	7.86556	11.5587	3.73076	7.07344	5.51179	9.48019	11.2352	9.48471	6.55933	8.02428	6.94595	7.24615	6.49619	13.2491	7.59561	7.82516	7.02799	11.9296
GRMZM2G133512	chr10	73205122	73217433	0	2.40847	0	2.95017	5.94174	5.63568	0	0	0	2.89778	0	0	0	1.65515	1.37737	1.73688	0	2.1979	5.10533	0	1.90784
GRMZM2G019284	chr4	238962114	238964660	141.702	151.985	140.364	145.933	104.799	114.062	109.009	130.546	150.41	145.12	107.171	102.494	113.614	108.78	98.7312	140.622	124.268	86.222	129.921	99.8677	134.703
GRMZM2G158462	chr1	205410477	205412879	331.095	368.434	277.723	346.047	235.088	425.604	498.018	356.158	350.978	305.266	401.917	344.655	341.57	362.681	281.438	298.871	372.629	186.25	299.435	379.112	367.046
GRMZM5G801076	chr5	208740968	208744027	121.836	92.2723	185.763	140.625	97.4613	107.341	170.441	142.661	115.674	176.845	120.388	132.35	108.799	102.842	124.755	156.67	171.681	143.371	164.634	107.572	166.501
GRMZM2G140299	chr2	108932088	108933535	21.1968	21.5111	22.5773	18.2027	12.5986	21.6994	18.7547	15.5061	15.6658	11.9338	20.2557	12.3223	12.5362	12.6828	11.038	24.1526	18.3891	18.6746	19.6989	17.0261	19.959
GRMZM2G449478	chr1	227581245	227584249	0	0	0	0	0	0	0	0	0	0	0	0	0	0	0	0	0	0	0	0	0
GRMZM2G348909	chr2	3409612	3414955	90.5601	72.3177	65.0166	125.382	82.0237	121.701	90.0941	130.502	91.0909	64.5455	94.0245	82.3823	118.053	102.585	100.372	137.571	92.1418	122.802	124.473	71.5516	89.5301
GRMZM2G066749	chr1	267907458	267910014	33.8475	30.1868	28.6716	26.1097	21.2637	26.8443	41.9601	24.6898	33.9258	13.358	14.0058	28.7905	23.8058	18.496	23.9883	27.2719	30.5066	21.233	15.2333	49.2066	24.074
GRMZM2G064810	chr2	202435992	202437002	0	0	0	0	0	0	0	0	0	0	0	0	6.93197	0	0.614913	0	0	0	1.1462	0	0
AC166636.1_FG008	chr1	19980657	19983477	6.27473	7.58372	23.8089	10.6914	20.4823	20.4345	0	29.5827	16.8872	16.306	4.94787	0	33.8595	14.8129	33.8355	13.4615	21.8721	19.5206	18.7688	19.6031	7.89697
GRMZM2G166348	chr8	154246057	154247918	16.7487	25.9204	21.0149	11.5436	17.3726	18.7812	0	20.4756	16.2053	0	15.7951	0	17.7287	20.0082	25.313	42.5302	0	24.5821	16.9494	0	27.9213
GRMZM5G851215	chr2	8078536	8079199	0	0	0	0	0	1.62226	0	0.42934	0	0	0	0	0	0	0.697973	0	0	0	0	0	1.17453
GRMZM5G837876	chr4	13225913	13226786	0	0	0	0	0	0	0	0	0	0	0	0	0	0	0	0	0	0	0	0	1.74829
GRMZM2G329757	chr1	255638115	255638364	0	0	0	0	0	0	0	0	0	0	0	0	0	0	0	0	0	0	0	0	0
AC203847.3_FG009	chr8	132964924	132966655	0	0	0	0	0	0	0	0	0	0	0	0	0	0	0	0	0	0	0	0	0
GRMZM5G866099	chr4	5437016	5439137	0.27851	1.73175	10.506	27.5243	3.54804	0.104437	0.169653	50.3981	1.61054	1.41587	10.2673	0	0	0	10.2178	2.54039	1.10773	14.3632	2.97174	19.8233	6.73823
GRMZM2G010136	chr2	216554405	216558932	58.8092	61.834	57.1235	70.572	52.9622	65.6569	34.0284	49.5097	58.8587	36.8272	94.6969	119.441	52.3319	55.9871	47.3237	51.4085	64.6299	53.1077	49.873	51.9018	48.2776
GRMZM2G107089	chr7	7453971	7459323	322.78	279.079	245.906	375.109	265.48	405.834	489.327	732.185	351.026	639.088	482.042	219.43	268.283	385.016	348.237	298.605	424.165	234.851	231.933	751.029	700.929
GRMZM2G703595	chr1	63444817	63445078	0	0	0	0	0	0	0	0	0	0	0	0	0	0	0	0	0	0	0	0	0
GRMZM2G060762	chr7	160371974	160380363	22.7695	23.5535	29.7625	20.8616	25.6972	33.8281	22.5888	24.1837	20.8255	21.4664	16.2155	19.4014	15.129	21.7716	19.4367	20.5728	24.3213	35.0776	29.7819	29.8859	34.3052
AC215678.3_FG008	chr2	10749486	10750759	0	0	0	0	0	0	0	0	0	0	0	0	0	0	0	0	0	0	0	0	0
GRMZM2G079365	chr4	213331456	213347631	39.8431	38.4806	37.3495	51.7106	35.3813	34.6044	35.5649	41.9172	37.684	46.8084	51.4175	38.4127	30.7605	35.3124	50.3106	41.9403	38.6461	49.5056	54.028	41.3876	53.3225
GRMZM2G135927	chr3	83533228	83533947	0	0	0	0	0	0	0	0	0	0	0	0	0	2.14885	0	0	0.688116	0	0	0	0
GRMZM2G383402	chr4	143978513	143979215	0	0	0	0	0	0	0	0	0	0	0	0	0	0	0	0	0	0	0	0	0
GRMZM2G096184	chr9	31087331	31099479	31.9185	41.1808	36.5852	61.3255	33.8617	54.4517	35.9151	55.4425	43.5251	34.8677	40.7736	33.2117	40.6553	48.1755	48.1151	44.7167	40.2113	28.14	42.0567	35.8877	42.4364
GRMZM2G410963	chr4	236965966	236968129	5.90384	8.91732	10.5856	10.8724	12.2229	17.5128	13.5194	7.89223	11.5722	9.82167	7.36804	9.13515	11.9341	7.68461	11.3831	7.11953	9.69849	12.2317	12.9113	9.68559	11.3121
GRMZM2G337749	chr5	173390746	173396034	40.507	38.7452	34.9765	38.4483	38.7946	39.2882	50.7223	14.9458	40.1304	49.7297	46.7019	55.5015	35.8462	16.5707	36.2402	37.517	21.0319	13.4161	43.998	54.3567	49.2037
GRMZM5G856022	chr4	117157001	117157827	4.35465	0	3.29342	0	0	0.431882	0	0	0	0	0	0.439629	0	0	0	0	0	0	0	0	0.105509
AC191575.2_FG001	chr1	295271367	295299822	23.3502	40.52	0	15.2721	20.7497	31.4396	19.3671	7.62788	54.262	17.5594	36.4773	37.5752	23.6477	51.2907	45.2904	8.51726	65.0299	71.2007	50.1298	26.077	31.5216
GRMZM2G069061	chr3	202140348	202149106	395.431	553.406	565.3	390.672	552.88	529.357	363.192	499.12	533.412	366.119	415.946	330.47	572.465	503.741	500.956	472.379	364.405	332.646	467.841	344.469	389.87
GRMZM2G421655	chr2	201782613	201797818	16.1294	19.0908	8.39565	15.5988	14.7811	28.5569	21.4262	16.9261	23.8216	10.0235	18.9315	16.7924	17.3745	23.1052	16.3866	13.257	11.1732	7.08741	11.9943	17.1283	15.4066
GRMZM2G141216	chr8	16700564	16704075	65.5854	54.1749	55.6051	60.2038	69.0889	56.8475	43.174	50.7329	63.8623	60.2713	57.079	48.3841	82.847	36.8218	64.1546	50.8811	66.483	66.8937	54.9026	66.4094	67.315
GRMZM2G100955	chr6	88564027	88565888	36.2988	55.9131	64.9078	70.4801	51.8873	65.4988	48.2393	65.8257	61.2796	71.192	47.4064	41.9392	59.576	63.7726	66.4684	65.999	55.0556	54.8466	84.6766	34.0231	72.5902
GRMZM5G875655	chr3	232042901	232045887	27.8285	38.1825	35.9093	36.8629	28.9404	35.4768	18.9319	39.4708	24.4456	17.2644	25.402	31.6011	24.3096	22.6945	31.617	31.3302	29.9141	34.3261	33.6444	23.4115	34.7756
GRMZM2G051891	chr2	190689014	190690630	0	0	0	2.19793	0	0	0	2.73394	0	0	6.39503	0	0	0	0	0	0	0	0	0	0
GRMZM2G029356	chr2	41009882	41019487	11.7962	74.8347	65.7473	1.92698	20.8085	0	13.6603	0	0	0	0	11.2059	21.9463	10.6467	1.28652	0	0	0	1.58661	0	2.22346
GRMZM2G165413	chr1	233294977	233298851	0	0	0	0	0	0	0	0	0	0	2.30144	0	0	0	0	0	0	0	0	0	0
GRMZM2G022841	chr3	227939020	227940838	0	0	15.7824	18.0613	0	0	0	0	0	0	0	0	0	0	12.9815	0	0	30.8975	0	0	0
GRMZM2G026780	chr1	270831293	270832294	153.187	94.3997	71.3446	125.116	97.9806	231.728	221.992	56.7874	1090.02	132.348	304.244	118.369	197.922	0	111.925	384.521	200.749	116.111	113.386	35.6862	92.5068
GRMZM5G813302	chr6	116223857	116226573	0	0	0	0	2.64173	0	5.50693	14.8242	33.1513	0	9.32562	0	0	0	0	0	0	0	0	0	0
GRMZM5G891944	chr3	28918299	28922839	34.1389	31.2433	35.8552	42.499	36.5622	24.9953	24.2099	38.0482	46.5375	38.0143	32.7038	42.8797	10.8918	29.1644	56.886	27.4773	38.1181	45.4535	51.6942	27.5979	39.9559
GRMZM2G113202	chr1	229190069	229205919	150	169.247	135.836	166.313	177.341	146.233	149.797	181.035	177.275	161.093	156.956	158.725	178.077	198.727	173.586	160.603	169.36	166.647	171.596	129.6	189.045
GRMZM2G377161	chr4	163385511	163389224	0	0	0	0	0	0	0	0	0	0	0	0	0	0	4.14435	0	0	0	0	0	6.32053
GRMZM2G014276	chr2	13346086	13352270	28.6468	14.885	31.0593	29.8681	24.7065	32.4508	28.163	38.4759	23.0556	15.7108	13.1529	30.3247	33.9004	26.5124	26.4181	17.561	14.9024	18.6221	2.90803	32.2144	0.930824
GRMZM2G044576	chr8	174759995	174761849	28.8832	35.26	31.3985	18.9822	8.72289	19.686	18.6457	19.8343	21.251	13.9853	10.7034	19.765	16.0438	17.0885	22.6723	18.5989	13.6014	14.7113	17.2409	27.2098	16.9813
AC204581.3_FG003	chr6	156532980	156533274	0	0	0	0	0	0	0	0	0	0	0	0	0	0	0	0	0	0	0	0	0
GRMZM5G825515	chr9	25264921	25268756	21.4844	28.4427	25.8033	16.0237	25.3329	27.6865	28.0214	30.9718	19.8994	9.54483	37.0853	20.9243	13.1719	34.6028	24.8538	23.584	16.9053	22.824	41.1887	22.9571	27.246
GRMZM2G138624	chr4	133923289	133925994	28.868	29.9871	22.2339	31.3905	20.736	29.3437	21.2633	20.5728	22.6284	27.4125	29.2931	20.4095	13.0146	18.0465	18.0905	30.9654	34.4273	29.6402	50.065	22.9406	21.4451
GRMZM2G145775	chr2	2118218	2120778	92.7276	88.9157	80.0484	70.2989	55.7841	81.0881	63.9524	99.4184	76.4487	79.205	81.977	92.1227	69.0724	80.4433	52.5635	88.1571	57.6023	67.5711	85.9753	94.7045	100.307
AC235534.1_FG007	chr10	136932959	136939534	0	3.38915	2.6437	0	0	0	0	2.59287	1.60854	0	0	0	0	0	2.04258	3.79473	0	0	3.54493	0	1.44772
GRMZM2G022095	chr7	115026425	115027474	0	0	0	0	0	0	0	0	0	0	0	0	0	0	0	0	0	0	0	0	0
GRMZM2G026189	chr7	2522401	2524117	0	0	0	1.54475	0	0	0	0	0	8.20637	8.71186	0	5.39744	0	0.768231	9.88044	0	0	2.99771	0	1.22844
GRMZM2G109429	chr3	168489942	168493085	81.3185	120.588	163.077	111.403	106.193	178.638	124.377	165.695	109.989	93.0041	100.022	137.251	64.3047	94.2175	167.897	115.646	84.9107	115.753	79.1122	111.352	104.461
GRMZM2G168920	chr5	52757704	52760813	189.713	204.957	177.809	181.441	152.306	166.106	212.051	202.454	200.406	129.201	152.48	159.734	153.249	211.696	151.029	176.519	172.018	160.094	134.009	128.103	168.464
GRMZM2G159768	chr9	143763117	143763765	0	0	150.417	0	0	0	0	0	35.7546	0	0	0	159.125	194.069	15.9574	0	0	101.663	73.5473	79.9773	0
GRMZM5G800488	chr7	307094	308928	29.5743	28.9106	30.5452	29.8579	24.9986	32.2846	29.9585	12.7998	9.35791	13.678	47.2353	38.9364	16.6993	31.1412	35.089	25.6315	24.6452	17.1045	19.5384	20.2917	37.8935
GRMZM2G425236	chr5	10212824	10214027	7.03867	8.26243	7.84684	4.24359	9.28973	3.93586	0	10.5288	6.34351	17.6892	8.96975	0	0	0	6.6391	20.2107	8.00717	6.38935	8.51112	8.28073	6.52478
GRMZM2G017137	chr5	14253938	14255319	0	0	0	0	0	0	0	0	0	0	0	0	0	0	0	0	0	0	0	0	0
AC212112.4_FG002	chr5	206187973	206193442	91.2227	135.536	136.995	118.813	120.012	122.634	102.74	141.559	107.164	144.736	93.3746	92.4409	145.472	116.883	95.2107	137.506	131.412	138.141	123.099	118.394	132.076
GRMZM2G165788	chr3	60304835	60308886	3.44307	2.90997	2.76171	2.7872	2.56663	1.49663	0	2.12001	4.47167	3.7793	2.83706	1.05035	0	2.7826	3.05309	3.70504	3.12822	2.61948	2.30476	1.58209	2.96887
GRMZM2G451394	chr9	2962700	2964114	0	0	0	0	0	0.701061	0	1.34943	0	0	0	0	0	0	0	0	0	0	0	0	0
GRMZM5G803590	chr3	222666674	222668014	0	0	0	0	0	0	0	0	0	0	0	0	0	0	0	0	0	0	0	0	0
GRMZM2G350793	chr1	169737426	169740876	0	1.6125	2.57532	0	3.36677	0	0	0	0	3.36392	2.29901	0	0	0	0	0	5.85395	2.63556	0	4.28714	4.48523
GRMZM2G108875	chr2	8154194	8155773	0	0.354849	0.258749	0	0	1.10587	1.7529	0	0.285902	0	0	0	0	0	1.37846	0	0	0	0.264068	0	0.245635
GRMZM2G063375	chr10	96617536	96618949	0	0	0	0	0	0	0	0	0	0	0	0	0	0	0	0	0	0	0	0	0
GRMZM2G524588	chr1	76093622	76094637	0	3.59069	1.50685	5.13042	0	5.88286	0	2.9629	0	0	0	6.02544	0	3.09895	3.91815	7.28022	5.31844	0	4.73589	0	0
GRMZM2G030144	chr9	16034640	16044752	76.2373	79.3898	69.8813	80.3124	68.5045	68.8295	62.9654	83.4222	74.0236	87.7663	71.917	77.6789	66.5087	80.7593	77.3678	77.221	69.7433	65.5741	81.6874	73.0034	75.9686
GRMZM2G138029	chr8	43847259	43848267	18.4569	48.8178	38.358	24.8591	31.3082	38.0586	29.5148	42.2031	33.5279	28.5929	20.8927	29.3629	46.005	0	29.2881	31.3698	22.4481	30.9129	26.4546	15.8993	47.4646
GRMZM2G098015	chr8	8614576	8615827	23.3374	17.5121	13.3865	10.6652	15.9419	23.8441	28.3759	6.17025	9.85742	22.4218	17.7733	17.0406	0	18.0341	6.46307	10.6796	15.0904	11.6118	14.2301	20.494	20.3598
GRMZM5G884242	chr3	1296730	1299851	462.65	254.736	393.908	389.704	356.635	247.835	367.561	258.919	206.341	340.469	525.533	215.724	189.529	238.655	284.805	245.089	261.557	344.971	387.155	361.484	324.993
GRMZM2G148198	chr2	54478975	54481403	0	0	10.6969	7.20089	19.9534	0	0	0	32.9632	0	0	0	25.4475	46.6601	0	0	0	0	23.0677	0	38.0055
AC197373.4_FG005	chr3	41194731	41194944	0	0	0	0	0	0	0	0	0	0	0	0	0	0	0	0	0	0	0	0	0
AC234528.1_FG005	chr1	204259323	204264422	210.241	198.72	231.712	257.147	162.899	192.133	192.879	222.808	262.863	166.7	262.936	159.815	167.162	186.558	192.326	193.834	137.19	169.376	140.105	196.481	159.439
GRMZM2G149326	chr8	48712225	48714381	0	0	14.8951	19.9185	0	0	13.0934	0	4.84559	8.17878	0	0	0	15.0939	0.905296	0	6.29248	0	0	0	0
GRMZM2G173424	chr3	115357900	115384056	49.1193	54.878	40.5811	47.7658	46.685	55.5717	33.6702	30.9981	51.4926	63.9587	39.8273	44.5578	45.932	43.8395	31.5453	54.4585	57.0353	56.0293	55.2121	70.2451	73.5446
GRMZM5G826984	chr1	162610714	162611336	0	0	0	0	0	0	0	0	0	0	0	0	0	0	0	0	0	0	0	0	0
GRMZM2G590971	chr8	161782906	161783544	0	22.6602	2.6971	32.2477	0	1.30294	0	0	0	28.248	0	19.8232	0	0	14.0421	28.4787	8.01354	19.4724	2.39458	0	18.4396
GRMZM2G023982	chr5	20990828	21003918	87.9444	153.94	63.0975	59.1659	52.6252	90.0242	106.978	70.6054	65.9029	152.446	57.6873	96.9818	36.6847	140.892	17.8336	93.4846	168.417	39.7937	133.637	93.8704	145.343
GRMZM2G003992	chr2	189272860	189275973	66.5982	86.1079	81.6502	74.9296	51.8748	72.0961	70.3959	90.9268	52.8864	58.5379	71.9599	55.9556	72.4652	70.0094	89.2587	75.6928	63.7615	72.7403	73.1958	75.1761	74.7778
AC208422.3_FG001	chr2	149005955	149006868	0	0	0	0	0	0	0	0	0	0	0	0	0	0	0	0	0	0	0	0	0
GRMZM2G128421	chr5	17343148	17344582	59.2703	95.7613	103.888	40.8919	37.1113	58.7236	39.5644	48.6436	31.8979	56.2877	41.2044	49.7856	21.6685	66.3456	41.3258	78.6103	57.7579	66.9016	78.0596	46.8459	78.33
GRMZM2G177384	chr3	216256699	216258478	38.1364	23.1053	28.6448	29.2053	25.2217	29.9375	20.7179	23.0372	19.995	43.0736	30.0638	30.6313	0	33.8981	24.3623	68.3052	18.9444	28.1077	73.1832	11.6349	0
GRMZM2G498656	chr2	202133051	202139091	25.6657	48.5113	19.3152	32.1321	36.4815	47.1623	0	36.1775	57.8057	48.3654	16.5055	0	0	30.3453	39.6638	34.7982	0	18.5046	46.2067	0	49.817
GRMZM2G043584	chr1	30256018	30259972	43.0676	40.9304	66.4788	64.5114	55.4591	62.9212	33.3751	52.016	50.6933	43.8635	43.1303	47.5998	51.9345	53.9023	49.5232	53.8212	45.7453	58.315	42.2615	47.4747	66.2622
GRMZM2G041238	chr8	13554390	13555376	1597.58	1839.92	1721.59	1881.29	1554.88	1597.01	1347.38	1973.95	1643.25	1579.32	1372.6	1281.62	1759.97	1467.06	1570.73	1580.37	1523.44	1488.89	1429.49	1220.34	1617.48
GRMZM2G009421	chr1	120186925	120189744	0	0	0	0.799553	0	0	0	0	0	0	0	0	0	0	0	0	0	3.73161	0	0	0
GRMZM2G028041	chr7	3664697	3670891	73.2127	28.2695	44.3444	36.3634	33.8008	37.3437	35.9486	37.4792	45.2667	44.0854	48.6215	37.8989	24.6634	41.4023	37.1764	36.6552	50.23	56.6195	44.9236	33.0637	33.2905
GRMZM2G087850	chr6	93000086	93006380	89.2833	124.117	114.67	113.067	105.149	134.312	115.317	135.236	111.739	106.864	92.8564	79.676	98.6638	132.597	84.996	136.336	93.7397	80.8016	118.94	108.785	103.195
GRMZM2G477238	chr5	145105146	145107376	10.5168	20.7834	12.6641	11.9582	5.82067	13.0931	12.3319	8.88835	11.8059	8.38275	5.58338	9.80452	6.09059	7.68884	8.75932	9.16795	7.62719	8.49826	11.0067	0	12.3587
GRMZM2G045699	chr1	228262783	228264914	0	29.7991	30.7726	0	0	0	0	0	0	27.3793	0	0	0	0	21.6597	0	0	0	0	0	9.69959
GRMZM2G069316	chr5	95899772	95903305	334.131	360.927	314.389	331.533	296.081	372.05	370.402	405.631	316.747	347.506	349.418	360.64	254.687	387.152	305.018	364.735	351.241	247.631	311.414	436.713	394.792
GRMZM2G128682	chr8	86584441	86586470	75.8398	54.4226	115.73	73.2424	33.0822	32.9023	19.4663	59.3866	55.7543	30.0766	49.054	28.9624	58.6784	75.5745	42.6976	57.614	87.911	38.5551	51.0172	39.2016	65.904
GRMZM2G365423	chr4	65819197	65826285	55.8172	66.6817	54.2983	89.6399	88.0439	106.333	85.587	111.162	111.735	75.2815	81.186	66.6175	111.724	116.298	88.862	77.082	62.8975	64.8491	74.3154	99.0485	91.78
GRMZM2G703714	chr1	111042928	111043564	0	0	0	1.41892	0	0	0	0	0.745784	0	0	1.83307	0	0	0	0	0	0	0.665403	0	1.11882
GRMZM2G469523	chr1	220099237	220101113	1152.04	975.156	1070.04	1479.21	808.837	1179.13	1058.33	1049.19	1041.48	1255.62	1267.78	1123.96	841.168	1591.12	975.484	1039.79	1203.83	832.855	1193.26	1001.14	1016.6
GRMZM2G348241	chr4	22701092	22701448	0	0	0	0	0	0	0	0	0	0	0	0	0	0	0	0	0	0	0	0	0
GRMZM2G082260	chr3	180769862	180776520	46.073	62.7943	65.641	87.2048	56.6881	87.7703	75.7474	70.0647	55.0942	65.5736	85.2309	72.5177	68.0514	83.6831	70.4989	64.9027	62.0909	36.7477	61.7803	72.8688	53.7576
GRMZM2G118014	chr1	297048515	297054513	265.029	205.781	138.716	203.522	157.68	170.157	153.92	190.258	191.888	306.135	363.398	118.102	205.996	214.478	126.022	242.611	278.57	158.151	160.672	442.888	188.142
GRMZM2G111113	chr3	221900824	221903136	4.42938	2.9308	0	5.47445	5.57533	3.61197	0	7.6353	7.17812	6.13983	0	0	0	5.81739	5.1167	0	4.42621	5.2325	2.64343	0	0
GRMZM2G092152	chr3	208902237	208905099	63.6446	71.5465	79.771	56.3168	41.9985	60.7394	0	74.2741	63.9239	77.7689	72.3567	31.8901	65.6639	48.8136	63.625	96.3128	60.4525	67.9618	71.3093	64.0163	63.5039
AC208113.3_FG001	chr1	263056024	263057088	0	0	0	0	0	0	0	0	0	0	0	0	0	0	0	0	0	0	0	0	0
GRMZM2G444073	chr4	30430970	30431783	24.3481	11.7827	9.91821	14.4067	14.5951	36.914	21.7664	14.499	16.8013	9.19112	13.0344	14.2467	13.0996	25.7913	19.7196	7.68424	17.5791	21.8697	28.9619	9.45675	20.0076
GRMZM2G023312	chr5	207452486	207454777	5.37126	5.51515	7.58363	7.41319	35.2955	7.82805	5.41108	11.0565	6.09061	6.46008	11.1012	5.8639	4.634	7.05062	3.80175	31.9009	5.65143	7.89706	6.93828	10.2725	7.95403
GRMZM2G020766	chr7	172259840	172271039	69.4092	96.9742	95.643	98.1432	85.0979	104.811	74.5824	81.6846	48.2153	76.4627	74.3209	88.2363	87.3536	88.5952	47.6895	89.8653	52.8638	97.383	66.0317	14.9477	110.263
GRMZM2G477879	chr1	269924865	269927088	96.5952	103.29	91.4062	131.151	119.098	121.233	85.7207	158.589	110.646	128.738	104.802	124.068	126.504	106.035	141.953	147.994	123.516	145.976	101.152	107.82	121.218
GRMZM2G170577	chr5	106234920	106236316	192.413	302.903	287.443	199.154	218.97	324.764	156.65	312.554	226.404	311.954	250.712	205.383	219.052	332.668	226.411	282.101	294.09	365.656	251.493	268.777	275.44
GRMZM2G049606	chr8	4787775	4788329	0	0	0	0	0	0	0	0	0	0	0	0	0	0	0	0	0	0	0	0	0
GRMZM2G124644	chr4	12974974	12976310	242.461	320.578	226.808	154.622	258.704	260.29	247.969	221.914	277.833	204.701	326.261	98.9033	233.113	352.117	448.81	242.936	294.752	208.604	474.888	143.431	226.531
GRMZM5G830329	chr10	84608949	84610855	5.94163	5.10472	4.84889	6.23953	5.34951	5.29093	4.5882	23.7831	6.39857	5.68835	7.98463	0	0	3.9054	15.1376	5.10475	6.42802	0	7.0497	7.77598	5.97883
GRMZM2G348551	chr6	113233722	113238779	8.84351	16.0351	10.1075	12.5538	19.1642	7.33506	10.0336	15.8954	16.0612	10.2194	5.10314	13.975	12.121	20.3661	15.0721	7.66092	11.4905	10.3759	12.7093	8.05049	14.951
GRMZM2G125138	chr6	5154588	5158797	68.1663	68.5585	69.6043	20.9882	74.1681	47.37	59.2032	83.2164	28.2588	57.4159	92.7275	49.8413	57.6706	59.9716	73.8195	85.8811	74.9093	24.5782	23.7347	60.0184	22.8444
GRMZM2G163507	chr3	137388470	137391025	0	4.01816	4.28137	4.17541	0	0	0	3.25094	2.8982	7.81945	0	0	0	4.08756	4.07013	3.99866	5.38208	5.16995	2.672	0	3.57847
GRMZM2G001131	chr9	113245074	113264616	1.86231	3.1918	2.9292	4.23347	3.47295	2.14513	4.11282	4.0861	2.17366	1.43538	1.30821	3.66934	0	2.63915	4.77249	4.99042	1.95123	2.30008	4.18121	2.85731	2.31406
GRMZM2G169259	chr8	168008054	168010427	3.26316	0	2.14878	0	0	2.09095	0	0	0	0	3.80211	0	0	2.26055	4.27118	2.76932	0	0	2.50946	0	0
GRMZM2G324506	chr1	225831141	225834326	0	0	0	0	0	0	0	0	0	0	0	0	0	0	0	0	0	0	0	0	0
GRMZM5G816191	chr8	65804601	65805078	0	0	0	0	0	0	0	0	0	0	0	0	0	0	0	0	0	0	0	0	0
GRMZM2G704349	chr7	9190186	9194168	0	0	0	0	0	0	0	0	0	0	0	0	0	0	0	0	0	0	0	0	4.31452
GRMZM2G063737	chr8	174533511	174538657	30.9645	25.4408	18.0038	24.5383	3.21067	18.0006	18.4092	17.7248	21.4372	3.75384	16.7942	20.0229	0	10.5193	18.9028	14.1896	11.2707	11.4702	14.2056	17.433	14.746
GRMZM2G039263	chr4	174901703	174907176	358.847	355.136	453.682	379.203	290.365	387.919	318.198	510.011	445.352	285.799	287.62	420.406	409.442	336.131	304.131	401.405	266.669	285.142	380.014	371.145	359.554
GRMZM2G073498	chr9	147166751	147170885	447.763	563.78	557.342	835.255	433.265	557.159	472.078	630.013	533.448	510.98	565.632	627.336	611.03	666.799	618.648	599.187	520.648	470.426	610.01	523.194	508.212
GRMZM2G066578	chr5	29898198	29906021	0	4.10458	4.10825	3.13566	139.266	8.46414	6.98202	12.5034	18.3872	5.82043	3.08808	0	17.8083	14.4517	32.458	0	0	0	23.7288	9.47424	6.3222
GRMZM2G332821	chr1	172120038	172122663	2.85189	3.7867	4.55869	10.5757	3.85194	5.76964	1.62459	3.68146	7.16196	1.29792	0.80529	5.31246	0.890578	2.64732	4.0292	3.31322	6.03402	2.83042	6.67949	2.3444	6.80814
GRMZM2G159481	chr2	51162718	51164738	16.6245	21.2591	12.9281	11.4148	8.21891	8.07812	11.6568	5.61541	10.9968	7.44221	9.52155	30.8845	22.439	13.522	3.18426	8.47553	0	30.301	0	33.5924	29.3478
GRMZM2G132000	chr2	145018864	145022556	978.177	1405.75	1377.05	1025.26	1523.34	1435.07	678.815	1256.38	1221.97	1329.49	1095.26	852.432	961.05	1388.3	1152.39	1305.45	1346.82	1441.36	1312.45	1048.94	1408.45
GRMZM2G374881	chr9	20969485	20973151	318.66	231.03	333.998	296.535	471.724	317.809	302.09	291.342	286.609	265.023	342.321	287.453	278.65	274.385	239.479	271.638	308.657	292.738	297.939	290.524	269.867
GRMZM2G018417	chr1	8311641	8351849	201.365	240.272	289.554	217.018	215.276	213.838	200.217	225.366	272.369	188.653	261.633	229.843	138.935	191.515	195.902	369.998	174.01	212.654	182.768	232.245	221.699
GRMZM2G379271	chr4	195323849	195325035	18.8091	19.5515	16.3168	28.5498	35.3347	22.2429	23.7405	26.2366	22.8433	20.0685	21.9873	12.4108	19.4457	26.0592	32.8279	26.1848	34.4321	25.2216	19.609	23.9601	19.3566
GRMZM2G163099	chr3	92535429	92536330	0	0	0	0	0	0	0	0	0	0	0	0	0	0	0	0	0	0	0	0	0
GRMZM2G137875	chr5	5781821	5782094	0	14.4918	0	0	0	0	0	0	0	0	0	0	0	0	0	0	0	0	0	0	0
GRMZM2G022987	chr4	231328316	231341114	28.3676	29.112	28.4318	37.0532	28.3436	37.7144	38.345	27.2838	33.7063	22.2739	31.0229	41.1193	32.2788	31.3389	26.9477	26.5116	27.9436	31.2729	28.9682	26.8841	32.004
GRMZM2G080652	chr1	183908458	183912375	111.601	84.2253	83.835	99.0148	92.7353	95.5867	66.4118	75.7863	95.4962	97.7695	136.015	105.029	99.458	83.1664	80.3409	86.7968	107.95	77.3627	74.4413	104.702	84.8451
GRMZM2G037350	chr8	128481826	128484336	26.9052	39.1692	52.0863	28.5668	67.9985	31.3562	27.3113	37.2251	48.6986	24.2975	22.4547	33.8314	31.4048	29.71	72.0356	32.1501	25.458	60.6441	45.1549	26.3769	45.6337
GRMZM2G034471	chr2	195035852	195038235	19.7089	15.9917	14.9963	13.2596	27.7721	20.4982	29.4333	18.7863	8.96963	36.2733	15.9533	9.55277	40.0582	40.4105	30.0678	13.3294	19.5228	27.9856	27.5852	5.52169	21.4968
GRMZM5G868402	chr10	136958031	136958498	0	0	0	0	0	0	0	0	0	0	0	0	0	0	0	0	0	0	0	0	0
GRMZM2G049432	chr1	290435830	290436732	7.92218	23.5269	8.55069	23.689	59.1139	10.6429	42.7242	19.7277	7.42105	25.6549	27.2112	6.0204	4.88356	23.1363	4.04574	11.6675	8.66261	3.09875	6.57153	30.0092	7.32264
GRMZM2G075683	chr5	186114384	186121691	96.2485	95.233	98.8586	89.6708	80.6611	92.1715	99.3333	101.088	94.3711	104.395	101.818	93.4413	96.2609	90.2409	96.986	93.3698	111.016	73.9229	93.8784	98.3515	99.9753
GRMZM2G146475	chr3	149408733	149409790	62.7992	145.378	390.209	97.337	38.3599	60.144	60.9383	105.642	51.3611	114.317	55.8598	86.3821	42.3863	43.6814	65.7322	40.763	85.1835	85.6748	119.768	121.458	111.893
GRMZM2G465091	chr10	132033329	132034374	24.5092	39.2184	35.2832	24.6483	13.0865	18.4852	22.4955	44.1761	44.5584	28.6624	17.2813	20.7426	0	29.6164	49.2295	21.022	34.2099	16.5177	46.071	30.5893	23.9934
GRMZM5G888934	chr5	169825724	169832814	0.389465	0.244854	0.398481	0	0	0.907733	0.529133	1.19458	0	0.445013	0	0	0	0.239229	5.99512	0.548466	0.0749236	0	1.08103	0	0
GRMZM2G000593	chr3	216484814	216488798	94.8528	144.235	102.641	156.8	100.127	134.197	326.769	163.705	238.059	141.637	6.18865	99.3384	245.299	287.952	227.887	167.253	121.463	160.083	192.606	256.483	177.797
GRMZM2G024898	chr2	12799341	12803684	8.46191	14.7281	9.50982	3.79748	5.68885	6.36729	5.05533	5.25772	4.33622	4.36741	3.47014	5.04339	5.44359	5.84051	4.75411	6.9376	6.03636	6.92787	8.13429	7.07061	5.98768
GRMZM2G026558	chr2	23836895	23839046	17.7743	22.0504	13.9862	20.0498	15.1678	21.4609	15.8896	19.36	20.2511	9.01845	11.1048	11.9145	11.9475	15.4102	24.402	15.6452	16.7898	21.463	21.1478	13.3541	18.9435
GRMZM2G163172	chr4	86877720	86879464	0	0	0	0	0	0	0	0	0	0	0	0	0	0	0	0	0	0	0	0	0
GRMZM2G104538	chr2	2495820	2497668	98.0611	194.067	121.661	188.141	202.462	202.49	150.795	143.849	154.145	197.577	155.871	207.893	176.019	142.225	153.587	169.958	116.257	215.866	161.829	155.236	183.961
GRMZM2G481615	chr4	232806719	232807790	3.55382	10.4919	6.01643	1.73927	0	3.2322	0	4.97546	6.13862	10.4087	4.73685	0	0	4.08715	0.42834	7.93819	2.73743	7.87278	0	0	1.61062
GRMZM2G135913	chr1	74229695	74231694	0	7.46099	82.0025	12.2254	13.6792	8.3397	11.7375	10.1125	20.6815	15.4143	8.5309	0	0	22.6874	4.64406	5.04074	0	37.4803	35.9004	24.452	3.69294
GRMZM2G342515	chr4	160954462	160955623	1236.92	1170.73	1230	1248.26	755.65	1005.07	755.344	979.916	923.037	47.6859	782.946	962.544	492.423	699.148	1198.01	806.827	889.107	587.575	842.855	105.072	791.274
GRMZM2G301031	chr1	236223433	236230410	0	0	0	0	0	0	0	0	0	0	0	0	0	0.49437	0	0	0	0	1.86973	0	1.34495
GRMZM2G356534	chr4	80230410	80231049	28.2017	44.2593	41.2402	23.7489	0	18.2633	0	35.7607	0	45.3373	56.991	21.833	43.5414	28.3915	23.9443	17.5134	40.6533	75.8412	64.2466	44.3472	68.098
GRMZM2G085279	chr3	81339450	81339973	0	0	0	10.7057	11.8321	13.7993	0	11.8848	9.90352	17.7852	14.5981	14.7379	9.47489	11.2137	5.81326	12.6463	17.3023	7.20219	12.0215	14.0257	0.383364
AC190609.3_FG005	chr4	194316919	194317327	0	0	0	0	0	0	0	0	0	0	0	0	0	0	0	0	0	0	0	0	0
GRMZM2G138077	chr3	129050524	129052783	52.0416	55.7212	54.448	65.496	49.6654	71.9405	54.9544	50.8079	73.5037	57.3966	63.1446	42.9976	43.7105	76.2149	41.0317	65.0188	64.1855	54.0457	66.7761	55.7561	58.099
GRMZM2G033086	chr4	184156543	184157088	0	0	0	0	0	0	0	0	0	0	0	0	0	0	0	0	0	0	0	0	0
GRMZM2G144873	chr6	4799136	4803652	83.4133	83.3812	82.5147	96.2688	65.8543	93.099	89.4354	84.0609	77.7747	81.6616	96.8585	75.9705	72.0669	76.7101	108.906	82.3605	79.4325	50.1815	94.3894	73.8885	82.1598
GRMZM5G877815	chr1	228565218	228565965	0	8.19227	7.14587	0	0	0	0	6.179	0	0	25.1691	0	0	0	0	0	0	0	7.88648	0	5.28147
GRMZM2G419994	chr4	236903206	236904698	5.31198	2.86454	9.26316	2.8025	11.3203	6.40149	0	5.51569	0	5.47352	3.74583	0	0	7.78122	3.72125	7.47695	12.8153	0	11.6567	0	7.64244
GRMZM2G100881	chr3	17940745	17947153	78.3782	86.3129	85.6041	95.0273	76.6319	115.059	94.2927	86.4664	80.0909	69.9586	85.3185	96.3217	100.366	95.3313	89.7843	92.7949	83.7871	94.4252	101.82	71.2568	95.2116
GRMZM2G001033	chr5	182188380	182193831	128.627	113.066	128.815	118.942	106.361	123.797	128.977	104.902	106.436	132.586	112.712	131.917	111.003	98.1186	101.231	103.549	133.202	103.616	108.269	122.032	117.501
GRMZM2G043162	chr4	40157242	40157996	467.494	1262.75	703.493	470.972	0	0	537.202	0	2193.88	1700.17	698.006	148.324	489.743	1625.36	1305.18	301.364	505.571	657.093	1082.94	460.523	610.488
GRMZM2G115988	chr1	237957761	237958519	0	6.36056	0	0	0	0	0	0	0	0	0	0	0	0	0	0	0	0	0	0	7.66237
GRMZM2G070392	chr1	227159063	227168947	1.73052	0.863479	0.321508	2.41734	0.869661	4.12168	8.88487	2.02201	1.74777	1.19507	11.2104	3.57863	0	1.38841	4.26738	2.55631	0.950572	2.25219	2.17355	1.19554	1.17156
GRMZM2G145556	chr6	165393176	165402270	38.906	83.0887	42.775	45.5926	38.0511	44.0318	43.2657	37.5843	46.1729	42.7985	47.2252	45.3246	42.2876	46.8257	38.2846	42.5427	57.5465	39.157	44.5532	38.8669	43.7527
GRMZM2G103266	chr6	81686908	81693610	118.288	160.196	85.874	104.112	107.754	175.042	142.962	169.7	161.661	163.297	100.335	169.213	145.35	183.074	115.552	105.699	181.726	96.9355	104.071	156.636	189.033
GRMZM5G876644	chr4	215683478	215686139	12.5524	18.9503	8.92252	13.5504	8.97171	16.1074	9.07997	14.9404	7.56829	15.4341	11.2229	10.557	9.73645	11.5106	12.0368	13.2406	20.5674	5.67085	14.6399	12.408	15.4412
GRMZM2G128146	chr5	173685523	173688118	39.7287	38.2175	49.5836	48.7469	48.0253	46.3674	41.6396	55.8171	21.8396	43.7312	58.3383	32.0836	40.4358	32.4295	61.1153	47.2032	19.2584	17.4837	79.3061	34.8336	59.2378
GRMZM2G052100	chr10	116057033	116058081	1012.86	224.032	1140.7	198.745	248.426	1036.88	279.168	419.738	721.698	359.825	652.323	868.345	582.36	2511.43	210.187	2059.36	467.743	726.624	918.501	690.519	228.572
GRMZM2G309327	chr9	131670768	131671798	39.1694	67.0813	45.1812	85.7027	32.2165	51.6289	33.3629	44.3983	29.365	61.1412	49.9232	46.4977	36.8938	70.5472	40.4422	18.2726	56.6394	75.7029	83.6685	36.4491	44.5291
GRMZM2G096051	chr6	82567142	82572034	96.2378	75.59	69.2147	85.8064	43.8451	68.3913	85.4424	95.0457	54.1356	62.3561	74.6862	83.9816	57.1274	73.3986	54.0406	63.4731	69.4904	42.7161	62.5073	70.2497	62.1005
GRMZM2G176495	chr6	142596564	142600535	21.6174	18.443	21.9407	12.0902	14.9222	17.6503	15.0764	35.2632	9.21288	12.8684	17.8854	8.83989	19.9241	23.2404	8.45941	19.7652	12.3241	17.0983	11.7221	16.0027	16.2105
GRMZM2G159678	chr2	87796432	87802932	119.522	221.452	143.746	63.3449	189.113	160.187	162.899	179.658	163.839	161.005	173.436	111.23	152.807	118.568	155.196	169.905	142.879	176.2	170.497	136.921	173.669
GRMZM2G077180	chr5	56833665	56838382	2.35782	7.74792	0.771561	2.32903	3.44009	4.10963	0	4.43476	1.94255	0	4.23902	4.64504	5.14521	6.46049	5.73789	5.12495	5.49415	4.20567	5.19287	4.36441	6.40876
GRMZM5G879583	chr3	86653855	86655139	0	0	0	0	0	0	0	0	0	0	0	0	0	0	0	0	0	0	0	0	0
GRMZM2G104649	chr10	107585019	107607547	272.717	424.585	313.374	439.061	387.783	408.693	389.614	493.16	397.303	419.219	389.66	426.048	466.3	449.146	371.788	438.849	402.274	379.113	352.003	360.909	437.457
GRMZM2G399136	chr5	61523859	61524821	166.614	221.262	243.947	189.967	151.524	101.264	214.138	133.698	124.619	182.939	242.257	173.412	195.794	286.792	263.194	147.931	320.969	211.441	329.142	187.568	206.129
GRMZM2G367411	chr5	12679870	12707265	34.671	40.1247	28.4515	43.2945	24.5161	41.9234	26.2332	37.2791	31.6645	28.8893	42.1619	37.3509	29.4226	37.5012	29.7153	35.1752	28.7964	31.4794	43.5882	29.8779	38.3049
GRMZM2G344183	chr2	232056649	232058570	0	0	0	0	0	0	0	0	0	0	0	0	0	0	0	0	0	0	0	0	0
GRMZM2G129405	chr4	199597886	199599305	21.0913	37.6392	32.1755	46.1196	25.5448	32.3178	44.1763	39.0798	40.0744	30.749	30.384	31.4613	45.1734	48.5022	51.2482	33.7095	39.6802	25.6587	47.3338	25.5764	36.5383
GRMZM2G123411	chr10	81169649	81173126	0	0	0	0	0	0	0	0	0	0	0	0	0	0	0	0	0	0	0	0	0
GRMZM2G074501	chr1	278711463	278714075	0	0	0	0	0	0	0	0	0	0	0	0	0	0	2.31776	0	0	0	0	0	0
GRMZM2G136347	chr1	182292590	182293715	13.2854	0	5.90413	5.13276	0	4.14632	0	0	0	0	14.3852	0	0	12.325	0	0	8.71919	0	10.0339	0	2.77652
GRMZM2G091717	chr2	50949874	50951182	15.3561	18.2332	26.4159	21.7335	35.6706	27.5286	44.226	35.9539	35.5928	33.6559	12.7597	24.2323	20.173	24.2917	68.5549	41.211	26.3002	35.6334	31.8703	36.3988	36.6327
GRMZM5G866989	chr1	72722574	72723852	4.26548	15.1567	9.49792	0	0	0	8.50769	0	16.6848	0	17.0893	0	0	0	0	6.33577	0	26.6832	23.3566	0	0
GRMZM2G078441	chr9	148445802	148448625	0	0	0	0	0	0	0	0	0	0	0	0	13.1036	0	0	0	0	0	0	0	0
GRMZM2G450424	chr8	168270604	168273283	133.831	72.3194	98.0369	87.7953	106.247	110.622	173.946	141.462	54.8528	101.222	91.4815	94.2189	81.3509	143.507	60.3589	70.8883	130.331	137.227	102.596	87.1853	86.1894
GRMZM2G040818	chr3	225319943	225320821	0	0	0	0	0	0.199675	0	0	0	0	0	0	0	0	0.37877	0	0	0	0.610485	0	0.552035
GRMZM2G046681	chr3	226572520	226577492	332.127	542.349	379.007	482.293	365.944	529.324	542.354	494.388	411.841	384.685	499.958	337.859	396.151	673.262	484.792	421.266	445.361	347.16	426.62	431.47	515.958
GRMZM2G550861	chr1	51010320	51011073	47.034	66.7108	81.6336	38.5712	0	43.9754	28.9854	28.8358	30.5581	25.6691	12.4299	22.3612	0	35.3167	14.3225	43.6362	0	42.0466	45.4809	35.5265	37.5413
GRMZM2G313646	chr2	172270990	172271587	0	0	0	0	0	0	0	0	0	0	0	0	0	0	0	0	0	0	0	0	0
GRMZM2G027344	chr7	153730091	153734886	19.5659	50.3673	27.8172	51.4362	21.6595	33.4331	12.7544	25.5199	34.5923	27.5043	22.0903	20.7689	25.4412	40.7769	40.0927	33.2461	20.8024	34.9571	38.9549	38.9835	33.8133
GRMZM5G802384	chr7	114882937	114883672	0	0	0	0	0	0	0	0	0	0	0	0	0	0	0.907669	0	0	0	0	0	0
AC215198.3_FG002	chr9	12718624	12720988	4.23485	3.19004	3.5131	7.83679	0	7.90617	5.31743	5.02812	7.27229	0	3.33649	0	0	0	4.86873	3.89191	4.83448	0	1.80873	0	5.63441
GRMZM2G104999	chr2	165379882	165383829	375.918	327.493	358.508	61.4759	382.555	492.591	292.942	407.687	353.726	477.651	362.227	270.044	301.163	385.574	442.713	381.678	315.281	443.664	496.837	360.534	377.307
GRMZM2G028730	chr2	86887383	86916480	414.1	372.051	403.262	389.888	267.639	394.599	315.227	369.487	340.854	296.673	422.373	386.603	364.35	412.974	262.388	346.756	275.452	288.387	260.59	369.337	446.369
GRMZM2G154872	chr6	86182096	86183649	5.58317	4.37188	0	0	0	3.28967	0	2.24917	0	0	3.7395	0	0	0	0	4.79452	0	0	2.62078	0	3.1042
GRMZM5G837251	chr2	221476305	221479537	0	0	1.8468	0	0	0	0	0	0	0	0	0	0	0	0	0	0	0	0	0	4.12145
AC208826.3_FG004	chr7	41829769	41830300	6.92858	4.78462	0	0	0	0	0	8.84686	0	0	0	0	0	0	3.34468	0	0	0	0	0	6.02939
GRMZM2G152908	chr9	122220189	122226863	6694.57	6367.3	7098.83	7206.95	6179.01	6942.91	4919.32	7096.29	6152.5	5363.2	6559.37	6795.75	9126.7	7959.1	10574	6016.29	5377.07	4630.65	5468.89	7164.87	6435.09
GRMZM2G116335	chr6	155597134	155598686	0	0	0	0	0	0	0	0	0	0	0	0	0	0	3.08358	0	0	4.52164	0	0	0
GRMZM2G176841	chr3	201182486	201185704	0	17.2297	8.2323	11.5889	0	15.0813	0	13.0817	0	0	0	0	0	0	4.66208	21.1438	0	29.3437	11.3688	0	16.0333
GRMZM2G455587	chr6	165806453	165809307	39.6608	46.331	32.8072	32.6685	30.635	34.0487	58.7237	44.7089	40.8968	36.3061	35.7928	38.4902	41.6709	46.9082	61.3436	43.0955	52.0561	31.7317	38.889	65.9421	51.8432
GRMZM2G059877	chr5	71130420	71134860	0	0	0	1.8697	0	0	0	1.72461	0	0	1.84341	0	0	0	1.27297	0	0	0	0	0	1.11436
AC196123.3_FG001	chr3	159705814	159708050	0	0	0	0	0	0	0	0	0	0	0	0	0	0	0	0	0	0	0	0	0
GRMZM2G097736	chr10	67771047	67774036	27.1058	36.5494	37.7569	32.0969	28.0409	35.4666	18.4283	39.802	48.6587	31.3269	35.3977	20.7486	37.7913	36.1888	41.4181	33.7741	30.8118	32.6026	42.003	24.521	33.5299
GRMZM2G016774	chr1	297787013	297795600	87.039	105.575	88.5082	68.1814	64.3986	114.928	123.244	111.711	107.956	80.1731	59.2507	80.0563	78.9758	62.7906	86.1245	93.5327	66.7518	68.5752	88.7911	120.784	76.6017
GRMZM2G703490	chr1	11399962	11402823	188.734	177.491	218.997	252.642	251.874	262.255	187.712	257.101	206.436	168.526	215.933	259.74	244.03	244.428	250.112	215.32	187.297	202.493	179.029	171.003	220.126
GRMZM2G071620	chr5	6917456	6924471	0	0	0	0	0	0	0	0	0	0	0	0	0	0	0	0	0	0	0	0	0
GRMZM2G075974	chr1	261568335	261571956	64.2012	67.3966	84.0989	67.6119	124.141	64.8737	82.3127	62.465	86.3789	68.0017	85.8114	51.7073	54.9105	84.5646	54.6504	86.512	38.4478	77.3099	112.016	47.6188	74.2043
GRMZM2G106836	chr10	148811850	148812582	0	0	6.75818	0	0	6.00232	0	7.27159	7.07966	0	0	0	0	5.36656	0	5.56795	0	0	0	0	3.88793
AC197340.3_FG004	chr2	41994603	41996093	0	0	0	0	0	0	0	0	0	0	0	0	0	0	0	0	0	0	0	0	0
GRMZM5G836530	chr8	144918017	144918158	0	0	0	0	0	0	0	0	0	0	0	0	0	0	0	0	0	0	0	0	0
GRMZM2G443340	chr8	127853410	127856864	82.6648	65.8177	83.4412	53.636	49.7569	34.2358	49.2032	30.6566	40.5666	56.3505	59.0898	63.9111	37.1923	31.3336	100.168	34.6009	61.2043	35.1692	54.9912	54.6559	69.4461
GRMZM2G073584	chr3	141261687	141325830	216.623	229.18	222.231	237.237	230.636	285.828	167.921	89.3995	164.197	224.049	136.376	205.258	221.358	73.226	75.0591	251.504	202.792	220.484	200.612	262.7	261.026
GRMZM2G006474	chr5	14472179	14478509	87.4805	98.6743	89.4059	97.4393	87.0418	106.25	100.453	93.2797	99.0956	86.0149	80.2815	83.8005	99.4112	104.554	104.622	94.7567	102.006	89.3928	92.9937	85.0314	90.0698
GRMZM2G087079	chr1	45505193	45506420	259.624	342.46	255.379	247.93	280.777	339.743	374.917	284.008	317.066	259.274	308.926	200.12	312.869	304.894	439.149	245.32	388.41	210.036	361.865	238.075	304.548
GRMZM2G524711	chr1	70577911	70590132	136.809	210.362	153.099	62.4934	118.669	113.834	104.151	73.4478	135.094	193.183	152.222	163.347	111.056	134.498	67.1449	161.686	52.8531	143.301	166.485	177.622	192.514
GRMZM2G013038	chr9	22952078	22952813	33.2226	32.6122	31.8277	50.0924	38.9723	37.4603	51.7879	43.4966	47.2095	53.8038	32.3797	25.9746	53.0406	59.9625	48.36	38.942	57.8428	29.7857	30.8686	43.8066	40.1149
GRMZM5G882080	chr4	134271017	134272056	0	0	0	0	0	0	0	0.174564	0	0	8.37315	0	0	0	0.129996	0	0.230005	7.38261	0.288414	0	2.74286
GRMZM5G840265	chr5	47119665	47120307	0	0	0	0	0	7.48341	0	0	32.6141	0	15.5018	0	0	0	0	0	0	0	0	0	0
GRMZM5G874903	chr5	5199219	5201271	144.967	153.734	140.228	203.305	159.232	218.201	244.874	171.666	10.2186	183.11	241.154	72.4176	142.961	218.887	205.269	156.739	107.2	156.643	205.598	174.707	349.128
GRMZM2G004172	chr9	149274595	149278053	675.649	481.52	611.729	423.307	436.616	467.358	694.645	538.327	493.008	797.991	681.295	567.513	469.6	546.057	395.767	518.007	807.253	569.29	435.725	651.641	455.081
GRMZM2G383854	chr1	84435282	84437368	0	2.87555	3.91194	0	0	3.14406	0	2.57563	3.65737	0	0	0	0	3.92428	3.89353	6.92693	0	0	3.12935	0	3.50849
GRMZM2G031479	chr9	32578909	32584513	6.27436	7.08634	8.85195	9.26738	7.89088	10.7786	7.4975	15.6706	10.7058	6.4639	7.45071	8.58116	9.61263	4.99798	10.4436	4.9862	7.50754	8.83071	11.89	8.81138	7.67459
GRMZM2G067373	chr6	112349350	112360258	14.3348	21.2381	21.8335	24.3544	16.0254	18.616	11.6209	15.0281	21.6381	22.0138	18.622	21.9823	24.0418	27.5927	15.4698	48.8051	19.6272	19.9764	19.148	26.856	15.4153
GRMZM5G815823	chr1	35808485	35814130	0	0	0	0	0	0	0	0	0	0	0	0	0	0	0	0	0	0	0	0	0
GRMZM5G829897	chr6	75618539	75619814	0	0	0	0	0	0	0	0	0	0	0	0	0	0	0	0	0	0	0	0	0
GRMZM2G461447	chr6	44591633	44595872	87.4974	66.2256	71.0979	65.1672	38.959	61.5864	48.0782	68.5525	44.8821	56.4827	72.0475	85.0069	49.086	55.0609	58.6741	61.0892	78.7708	41.1793	53.5672	77.565	53.5955
AC205417.3_FG003	chr1	146393559	146394078	0	0	0	0	0	0	0	0	0	0	0	0	0	0	0	0	0	0	0	0	0
GRMZM2G344279	chr1	104275318	104278538	89.1118	113.13	94.6719	315.529	272.167	252.768	340.403	378.964	281.043	231.252	317.011	286.611	256.528	321.59	286.813	318.577	277.642	299.559	85.5748	263.889	268.609
GRMZM2G013342	chr1	290448165	290449263	10052.7	10436.2	8064.24	9140.04	10215.3	9160.47	13337	8038.99	10106.2	7292.69	11225.2	5228.08	8276.61	9984.58	10097.2	7408.25	8539.62	7261.8	12633.1	7356.36	8336.48
GRMZM2G037993	chr2	224463081	224467568	6.13393	3.34781	7.94387	0.647732	2.61626	8.38957	0	8.88644	1.69935	2.76091	2.0168	1.20071	0	0.645667	1.12198	1.27311	1.4462	1.94495	2.05925	1.26241	4.13391
GRMZM2G117347	chr1	200071407	200072295	0	0	0	0	0	0	0	0	0	0	0	0	0	0	0	0	0	0	0	0	0
AC187813.3_FG002	chr5	186824225	186824627	0	0	0	0	0	0	0	0	0	0	0	0	0	0	0	0	0	0	0	0	0
GRMZM2G173684	chr4	193761245	193764934	26.4333	26.0339	28.5733	40.2334	50.9066	34.457	46.8623	38.744	24.8898	50.0891	35.3381	35.2683	45.5978	38.0571	21.6905	37.2392	37.2679	46.7849	37.6597	44.8022	40.1488
GRMZM2G110983	chr6	66201454	66205629	267.915	284.792	364.27	371.015	358.15	383.243	242.771	290.45	366.774	335.951	334.349	270.853	353.751	433.578	303.505	348.992	312.8	318.718	317.371	224.82	325.793
GRMZM2G052991	chr3	217806254	217809492	0	0	0	7.31837	0	0	0	0	0	0	0	0	0	0	0	0	0	0	0	0	5.25327
GRMZM2G378215	chr2	192751835	192753000	0	0	0	0	0	0	0	0	0	0	0	0	0	0	0	0	0	0	0	0	0
GRMZM2G495102	chr2	157165016	157166184	0	0	0.70961	0	0	0	0	0.19971	0	0	0	0	0	0	0.0699444	0	0	0	0	2.23843	0
GRMZM2G331964	chr4	177383131	177385088	0	0	0	0.092252	0	0	0	0.559976	0	0	0	0	0	0.112209	0.865092	0	0	0	0.466962	0	0.0623708
GRMZM2G419104	chr4	74466431	74469619	0	0	0	0	0	0	0	0	0	0	0	0	0	0	0	0	0	0	0	0	0
GRMZM2G157177	chr1	32158871	32167717	45.9986	51.2249	52.3815	79.4076	46.9835	54.0781	51.1994	44.4714	39.3645	60.5816	52.9841	62.3395	48.7622	50.2715	38.7021	54.0936	50.1674	52.9578	48.8912	54.2108	56.8418
GRMZM2G382632	chr3	212018640	212021275	11.5711	24.1473	18.1168	20.8295	32.781	19.7839	29.3819	31.2172	15.2672	25.8472	31.2738	19.1135	19.3492	24.2819	11.654	16.4543	23.3201	23.7669	18.8152	36.1211	18.2337
GRMZM2G028945	chr10	107762377	107767126	200.998	221.549	181.318	255.242	171.2	207.133	215.414	246.264	208.409	217.284	228.976	247.108	212.773	180.09	194.165	232.992	208.637	198.362	215.387	247.762	221.942
GRMZM2G474531	chr5	163409582	163412899	57.223	58.503	40.7119	70.1439	45.697	48.6189	60.3412	57.6664	57.5739	51.216	83.0164	32.1728	75.8159	66.7632	75.3523	66.125	58.6317	75.2953	69.7348	41.9502	46.8843
GRMZM2G074821	chr3	211381065	211385001	40.5166	56.3261	42.2264	44.2015	43.4701	47.6198	56.1056	46.236	25.7913	43.5146	22.2497	29.22	25.8625	38.3658	46.3694	49.3525	37.3335	45.5873	76.6958	22.8065	49.1427
GRMZM2G173658	chr3	189815553	189816192	0	0	0	0	0	0	0	0	0	0	0	0	0	0	0	0	0	0	0	0	0
GRMZM2G107945	chr2	224908573	224912937	40.0729	9.20887	42.7059	19.7153	18.8324	20.4722	27.8882	12.9888	22.969	7.83013	18.0138	24.53	24.2003	25.3731	16.5753	11.0298	9.2808	28.5069	8.5005	22.8976	23.0066
AC194425.3_FG005	chr3	191278467	191279273	36.3807	61.721	78.9914	29.551	64.5008	36.4005	45.6737	58.914	80.9596	52.143	57.3907	45.7199	43.0002	40.3156	40.0366	50.496	16.759	58.1215	58.5291	38.7019	74.2459
GRMZM2G309126	chr10	83083735	83085319	4.44851	122.555	3.48479	218.707	5.18497	4.67814	0	5.05692	2.91959	3.58586	170.915	12.0217	119.107	3.5321	5.44628	0	0	172.64	6.34148	5.49205	0
GRMZM2G337113	chr2	42257260	42259297	11143.3	14310.3	12903.6	13548.7	14554.2	17152.4	13835.3	13475.5	14970.6	9402.58	13702.4	5607.69	12731.2	17434.5	13447.9	11842.9	11474.7	9720.01	16092.5	9511.87	13337.7
GRMZM5G849959	chr1	57835788	57840955	65.6303	42.9926	31.6431	40.9498	38.9101	49.0087	50.213	35.4082	51.7554	71.7231	56.0907	60.2561	43.6092	50.242	26.3337	54.5463	57.5728	43.5915	47.7098	48.9134	55.3547
GRMZM2G166208	chr4	5985017	5986424	0	0	0	0	0	0	0	0	0	0	0	0	0	0	0	0	0	0	0	0	0
GRMZM2G135674	chr5	56901595	56903498	0	0	0	0	0	4.51222	0	0	0	0	0	0	0	2.24997	4.79558	0	0	0	3.73792	0	3.24413
GRMZM2G053600	chr4	30196625	30200295	107.856	120.801	129.298	133.822	138.784	147.451	104.158	103.364	130.584	111.236	121.195	133.319	135.121	123.81	141.473	122.268	118.801	118.732	147.596	115.296	114.741
GRMZM5G874483	chr7	28336009	28336153	0	0	0	0	0	0	0	0	0	0	0	0	0	0	0	0	0	0	0	0	0
GRMZM2G703888	chr1	209556789	209557360	0	0	0	0	0	0	0	0	0	0	0	0	0	0	0	0	0	0	0	0	0
GRMZM2G056786	chr1	10970656	10972234	8.69255	14.1396	9.46128	16.1466	11.088	15.7692	29.9916	17.2303	20.9679	19.5861	18.5777	7.45853	12.5141	19.3671	13.7605	19.8846	6.42603	10.0812	16.3934	0	10.2846
AC190632.2_FG004	chr4	151505626	151509053	0	0	0	0	0	0	0	0	0	0	0	0	0	0	0	0	0	0	0	0	0
GRMZM2G066410	chr7	20329183	20329634	0	0	0	0	0	0	0	0	0	0	0	0	0	0	0	0	0	0	0	0	0
GRMZM2G159389	chr10	140344784	140347607	131.579	163.305	151.302	183.805	162.654	199.375	139.308	189.168	156.822	135.576	157.797	124.047	126.459	162.632	157.012	159.672	125.048	177.299	190.398	173.245	198.393
GRMZM2G340065	chr10	147458822	147464026	243.294	234.495	206.907	208.568	167.906	180.976	165.62	152.5	169.25	144.929	240.684	234.015	137.178	217.093	242.084	222.348	237.506	246.037	209.546	244.554	206.563
GRMZM2G522710	chr2	228385920	228386415	0	0	0	0	0	0	0	0	0	0	0	0	0	0	0	0	0	0	0	0	0
GRMZM2G085246	chr9	105527020	105535572	165.721	170.374	116.874	204.09	167.101	155.489	203.38	215.089	143.791	209.134	270.67	147.573	114.35	152.605	178.486	181.115	166.081	127.309	136.184	184.125	211.491
GRMZM2G700004	chr9	136161673	136162379	0	0	0	0	0	0	0	0	0	0	0	0	0	0	0	0	0	0	0	0	0.392992
GRMZM2G002135	chr8	159882827	159886413	26.6006	22.4608	27.183	36.4752	36.34	37.9519	33.6892	46.6744	30.8396	20.5829	25.7812	21.9042	37.1771	27.1865	32.724	30.3806	14.3654	52.4225	34.9501	29.5096	39.0486
AC233788.2_FG002	chr8	169418844	169418994	60.3654	40.7774	40.038	89.3483	155.716	39.82	104.522	61.6556	33.2548	0	43.4327	0	0	0	35.6132	55.6791	61.6089	75.5845	58.3716	0	0
GRMZM2G144581	chr5	127602042	127605592	135.177	256.714	346.918	257.607	445.649	479.907	188.035	400.851	166.374	353.643	333.148	259.578	539.641	304.223	51.4766	300.148	254.458	70.094	266.821	439.085	414.431
GRMZM2G399067	chr4	171599124	171605702	10.2003	11.7523	6.56442	12.8906	5.59563	13.3554	9.99052	14.0941	5.75293	9.56213	27.3089	25.6563	10.0575	10.9918	7.99446	17.5992	11.9472	10.728	12.1395	11.0043	17.9954
GRMZM5G800925	chr9	147202568	147208034	41.3287	49.6835	44.3739	70.6613	64.4957	58.9342	166.262	220.924	42.4201	65.8715	67.6685	60.0325	107.58	57.4009	58.4113	66.0636	62.8857	220.758	37.6352	56.5937	269.139
GRMZM2G038335	chr4	226284423	226285475	35.3242	58.7751	26.5559	46.1533	32.3388	37.7266	38.2506	40.5447	25.2175	40.3212	41.554	39.5971	14.8191	50.9153	15.2996	36.2156	55.0844	97.8057	53.451	34.4569	49.4072
GRMZM2G170567	chr1	9522788	9541394	96.8372	148.263	69.6881	152.099	121.651	147.225	129.492	149.526	151.939	105.875	98.4358	140.687	115.963	162.895	135.275	134.965	99.3066	115.843	131.088	93.0402	123.844
GRMZM5G836378	chr5	207036080	207040705	75.6573	93.3089	68.3849	78.7572	81.0621	85.9955	79.5464	80.2774	85.0767	72.4256	96.2445	67.6269	67.5132	80.771	95.6749	91.2048	130.327	101.937	98.0955	73.6484	92.6208
GRMZM2G368134	chr3	12276231	12277356	0	1.89943	3.85138	0	0	0	0	5.50829	2.02233	0	0	0	0	0	3.0207	0	0	0	0	0	1.75417
AC193606.2_FG005	chr5	79197083	79198076	0	0	0	0	0	0	0	0	0	0	0	0	0	0	0	0	0	0	0	0	0
GRMZM2G081912	chr3	55886761	55888952	18.5575	18.2456	21.6947	30.0452	14.5398	17.8784	20.5626	17.8461	18.9668	24.8634	25.0901	15.1879	8.55464	13.678	21.892	20.219	20.5563	24.652	19.3404	25.0197	27.5999
GRMZM5G886709	chr1	280196619	280205417	57.4793	49.9722	49.403	44.3403	61.9981	53.8619	81.3484	15.1446	40.3703	61.9049	54.3871	66.8085	55.999	49.0623	42.9049	41.4653	61.0592	43.008	52.7523	68.0004	50.8986
GRMZM2G058630	chr1	108013780	108015140	0	0	0	0	0	0	0	0	0	0	0	0	0	0	0	0	0	0	0	0	0
GRMZM2G006830	chr9	136576620	136577373	0	0	0	0	0	0	0	0	0	0	0	0	0	0	0	0	0	0	0	0	0
GRMZM2G058498	chr10	49799361	49810638	109.485	107.756	112.22	120.588	101.585	104.932	90.4778	96.603	122.299	128.745	145.665	132.948	121.978	122.391	111.169	119.801	128.085	103.75	104.655	125.571	102.922
GRMZM2G152655	chr4	34264142	34265135	0	0	0	0	0	0	0	0	0	0	0	0	0	0	0	0	0	0	0	0	0
GRMZM2G064775	chr5	36764588	36765932	0	0	0	0	0	0	0	0	0	0	0	0	0	0	0	0	0	0	0	0	0
GRMZM2G140409	chr3	203462149	203462893	0	0	0	0	0	0	0	0	0	0	0	0	0	0	0	0	0	0	0	0	0
GRMZM2G099130	chr2	18509781	18514307	67.8157	77.0731	59.1088	75.8637	77.5897	71.7381	78.2157	71.2817	76.6717	58.9549	75.6519	83.2262	70.5049	72.6216	91.061	74.8065	83.979	86.3504	71.5729	64.1604	68.1982
GRMZM2G433433	chr9	20824693	20826403	34.2728	49.565	39.9296	42.6243	43.0781	47.7837	54.853	55.004	28.6489	27.1737	38.9694	28.4646	45.5166	44.6134	53.0589	27.7926	36.8031	41.4649	53.8936	39.3637	37.1571
GRMZM2G043460	chr4	94857239	94858229	0	0	0	0	0	0	0	0	0	0	0	0	0	0	0	0	0	0	0	0	0
GRMZM2G063216	chr4	184639457	184643071	53.4003	51.7729	66.071	36.3315	50.8352	47.0435	24.7381	36.2344	35.2999	42.9522	32.775	41.1938	40.5142	45.9106	48.0307	53.3604	28.993	48.3903	44.5728	31.5357	41.0702
GRMZM5G865112	chr9	144448310	144449818	77.9709	95.054	84.5548	95.7115	80.1175	40.8415	84.0506	43.271	80.4742	84.8033	35.6374	21.6074	83.0431	41.8056	87.2938	104.651	91.0714	85.0364	93.8177	81.3753	36.4973
GRMZM2G085547	chr4	170221854	170228873	149.515	104.415	115.479	107.791	125.912	132.165	108.265	107.615	124.571	121.001	112.291	136.039	97.6259	114.922	108.602	85.5099	107.702	107.268	98.7687	112.826	111.265
GRMZM5G802392	chr1	2841466	2842386	1389.39	898.356	852.158	789.377	730.108	885.134	1060.22	777.285	719.431	1154.84	1234.52	1277.13	769.343	760.23	687.284	705.148	1177.02	846.848	890.347	1594.18	917.033
GRMZM2G002297	chr8	148897940	148905608	32.8676	50.2883	43.4246	70.37	61.7553	72.9901	48.4665	63.1073	23.8807	55.8857	50.7293	60.6245	50.06	46.7273	46.1984	74.6949	25.6888	43.4761	47.9126	33.7682	52.1986
GRMZM2G377686	chr4	93831496	93834960	0	0	0	4.21601	5.26588	0	0	0	0	0	0	0	0	5.83625	5.1218	0	0	0	0	0	2.7283
GRMZM2G434317	chr7	158023978	158036955	27.4855	23.3353	39.2652	48.0057	39.9841	26.6121	51.3989	40.1934	48.2658	58.4557	52.1615	50.8764	47.4141	28.9757	45.1948	53.3438	58.3598	11.773	65.8072	44.3139	43.3201
GRMZM2G474694	chr1	833248	837343	0	0.775014	0.80854	0.772157	7.03789	1.01829	0	2.13437	2.45576	0	0.422078	1.67726	3.35539	0.785212	1.92851	0.997064	3.18661	0.988981	1.40769	0.739624	11.1768
GRMZM2G059634	chr6	118147443	118150871	65.4324	100.713	101.56	101.598	99.3445	93.89	53.9517	103.887	96.7668	62.8061	57.5267	63.0575	60.8386	89.1669	82.0006	87.2787	73.2907	86.6893	72.2898	63.7449	85.6583
AC205730.3_FG002	chr1	166324699	166341219	18.7157	27.9567	19.4153	42.3632	37.1845	27.4328	37.8162	36.8134	34.8275	20.7171	29.7375	32.8727	37.2767	39.4797	42.1383	33.3076	31.9065	29.4601	34.5495	20.9965	23.9587
GRMZM2G145632	chr8	97176484	97178150	31.3754	20.5834	19.7361	30.928	8.54069	55.6184	49.027	32.133	58.7235	17.4201	23.5686	0	0	45.8914	4.07855	11.085	7.27981	22.0228	7.64181	43.8667	56.0542
GRMZM2G449941	chr5	114371665	114373221	1.51042	5.39084	3.69819	0	2.64207	0.619832	1.76811	2.75702	3.56346	6.42186	4.55371	0	0	7.93684	2.25708	6.64318	3.61663	9.61226	4.85311	6.47333	13.4485
GRMZM2G179120	chr2	175830294	175833357	195.403	205.84	264.169	215.359	150.071	193.681	226.923	230.553	202.091	176.439	208.808	192.651	155.362	215.797	188.18	137.093	190.92	153.384	207.415	152.474	193.053
GRMZM5G885628	chr1	61019343	61022157	167.288	180.003	170.835	141.526	160.177	174.856	156.47	150.495	125.732	146.188	127.55	148.213	160.069	177.716	124.124	161.269	107.541	117.878	128.488	146.285	149.893
GRMZM2G356639	chr4	111698274	111702957	0	0	0	1.01442	0	0.565097	0	0.926683	0.910013	0	0	0	0	0	0.599202	0	0	1.06171	0.598624	0	0.70099
GRMZM2G400725	chr9	41358453	41361058	4.92037	4.56877	1.39081	12.3095	0.385208	6.67395	0	2.42786	0.203882	0.408875	0.786573	0.35312	0	4.39736	1.85596	0.36329	2.49222	0.305151	1.70913	1.74245	0.699604
GRMZM2G057296	chr7	24405652	24409093	47.6801	63.5862	48.7779	73.9892	39.1119	56.6955	47.8092	37.8185	45.9443	45.0804	76.5859	62.0368	28.4729	90.4351	55.6331	86.9201	63.0809	43.8479	60.2587	55.7795	45.3317
GRMZM2G012724	chr6	141413047	141415248	38.5479	37.0735	35.4263	18.1964	37.2497	27.1494	15.4243	33.3381	25.7614	38.5474	28.3857	35.3243	18.5793	18.4172	20.6609	47.7623	54.5285	62.663	61.0146	22.8552	32.1776
GRMZM2G169024	chr5	198297112	198298382	0	0	0	0	0	0	0	0	0	0	0.143148	0	0	0.150851	0	0	0	0	0.100929	0	0
GRMZM2G305640	chr1	63682736	63684856	0	0	0	0	0	0	0	0	0	0	0	0	0	0	0	0	0	0	0	0	0
GRMZM2G148930	chr9	136829152	136830315	14.7876	51.8816	47.5857	18.2511	17.39	16.5019	84.2166	32.9901	110.269	12.2196	42.7486	28.3132	91.2946	14.081	42.3528	15.7541	32.2895	29.8089	9.68663	16.5373	8.46234
GRMZM2G426802	chr1	3364323	3369043	31.3504	44.5609	45.0723	43.6371	46.1855	56.5159	33.5057	36.2939	51.4367	37.9782	38.689	33.5335	47.5899	43.761	52.4159	49.1666	41.0716	50.4534	55.0056	36.0747	43.8477
GRMZM2G138338	chr3	147403659	147407494	79.6877	74.6129	70.0999	76.4674	63.5897	54.0428	93.2593	78.226	76.7772	82.6866	82.9743	72.1446	43.7686	43.9748	85.6835	60.6486	74.5986	57.4816	64.5483	80.9997	49.8202
GRMZM5G841805	chr6	45526391	45526622	0	0	0	0	0	0	0	0	0	0	0	0	0	0	0	0	0	0	0	0	0
GRMZM2G089688	chr6	38406393	38408855	248.549	235.532	273.546	253.46	191.481	322.05	232.467	260.248	258.828	234.526	224.775	271.54	216.747	190.64	141.856	254.854	296.454	184.315	241.587	224.846	366.047
GRMZM5G897740	chr5	215320398	215321009	0	0	0	0	0	0	0	0	0	0	0	0	0	0	0	0	0	0	0	0	0
GRMZM5G865319	chr4	16611108	16613259	16.2102	18.9722	20.7985	11.1766	22.9464	26.5106	24.9155	20.6504	23.3992	8.04181	16.0957	12.7634	15.4221	11.6644	18.231	18.5227	21.3627	17.5505	15.1703	21.1049	21.7945
GRMZM2G307908	chr1	246402232	246403925	0	0	0	0	0	0	0	0	0	0	0	0	0	0	0	0	0	0	0	0	0
GRMZM2G373396	chr2	57612299	57613212	0	0	0	0	0	0	0	0	0	0	0	0	0	0	0	0	0	0	0	12.9091	0
GRMZM2G067710	chr1	295692208	295692971	0	0	0	0	0	0	0	0	0	0	0	0	0	0	0	0	0	0	0	0	0
GRMZM2G394027	chr7	133047657	133053094	5.41884	6.27144	9.48487	4.7607	7.82489	12.122	8.38206	7.77671	4.55805	11.8776	8.40315	4.54433	4.69318	5.65635	7.20658	5.42805	6.7285	11.1165	10.2919	3.67824	11.672
GRMZM2G701585	chr10	102487648	102500504	41.3924	48.9312	59.8139	55.9004	43.0845	48.7636	41.405	53.3657	44.693	40.0141	45.5989	44.2281	52.6707	47.3475	50.7844	50.1289	35.7643	62.3959	69.7895	40.7376	55.8265
GRMZM2G161780	chr1	29151673	29157313	27.3418	33.6985	54.9706	43.4947	46.2313	39.4349	37.9938	66.6706	44.4251	63.4025	61.7063	35.5745	43.8082	43.3891	45.7824	26.7369	52.1364	34.0239	60.4326	44.2902	43.7429
GRMZM5G854613	chr4	221070735	221076802	532.643	512.159	566.629	539.868	666.529	681.758	442.425	500.964	481.992	607.704	565.622	532.15	662.711	486.06	347.116	587.461	450.914	448.725	411.839	591.093	439.489
AC220927.3_FG008	chr5	208689536	208694342	0	0.903105	0	0.804814	0	1.36459	0	0.607545	0.955472	0	0.881552	1.32383	0	0	0.135553	0.716817	0.893872	0	0.700184	0	0.377417
AC205712.3_FG003	chr9	44973395	44974862	0	0	0	0	0	0	0	0	0	0	0	0	0	0	0	0	0	0	0	0	0
GRMZM2G067675	chr8	17301644	17306811	28.8278	28.6978	31.8886	18.4806	31.4066	12.6702	33.5313	25.5225	41.3877	30.0051	32.0724	21.6079	49.2878	29.7563	29.5575	19.8829	17.0413	21.4913	18.0875	26.6182	31.9783
GRMZM2G074604	chr5	186677003	186680745	2328.51	2571.43	3451.06	2166.26	2823.32	3387.11	1991.34	2445.9	2306.29	1946.01	1509.67	2638.57	2399.32	2322.28	2850.84	2381.54	2281.69	3845.42	2557.06	1674.01	4052.91
GRMZM2G074414	chr4	239627274	239630488	36.0058	11.3116	14.6342	59.1543	37.1624	59.9156	46.4396	36.7905	61.9406	48.3	40.2805	40.4949	60.1034	62.7728	47.1081	26.9602	48.0097	24.4468	51.9	46.8869	34.5494
GRMZM2G450797	chr7	3906464	3907229	0	0	0	0	0	0	0	0	0	0	0	0	0	0	0	0	0	0	0	0	0
GRMZM2G049211	chr1	56020500	56032735	87.9192	85.9347	78.8262	81.9931	104.491	114.599	72.1014	99.096	94.1268	115.48	91.0312	79.0569	111.979	81.0141	137.485	87.369	98.8347	121.373	89.1387	91.4721	92.1032
AC207798.2_FG003	chr6	128483793	128485104	0	0	0	0	0	0	0	0	0	0	0	0	0	0	0	0	0	0	0	0	0
GRMZM2G096391	chr3	168290231	168298790	860.467	659.93	554.772	763.522	718.097	745.036	973.123	493.531	964.178	746.448	797.595	405.827	678.126	870.032	531.929	660.94	641.894	564.883	777.003	678.334	695.112
GRMZM2G112240	chr4	170914967	170918489	300.948	166.459	311.724	270.088	283.48	315.683	257.336	290.853	319.541	281.475	296.005	306.79	290.904	321.048	265.98	298.204	339.668	267.983	306.784	276.856	291.633
GRMZM2G447847	chr2	4926256	4931829	0	0	0	0.150096	0	0	0.450921	0	0	0	0	0	0	0	0.226724	0	0	0	0	0	0
GRMZM2G075715	chr7	39731123	39737775	3.32	1.80234	1.83771	2.57241	1.99358	1.2828	2.18855	1.78575	1.13165	1.86648	2.21257	4.62563	0.679562	2.25183	2.96366	3.18556	0.673723	1.15141	1.19722	2.24615	1.08913
GRMZM2G128895	chr3	42243899	42251604	58.202	59.5508	56.9515	60.6174	45.3564	57.481	56.1848	53.7259	38.7836	66.9435	47.4933	59.5611	45.809	53.864	45.5627	58.1077	54.5534	49.2719	53.3688	56.6646	59.8423
GRMZM2G347978	chr2	235816083	235816617	0	0	0	0	0	0	0	0	0	0	0	0	0	0	0	0	0	0	0	0	0
GRMZM2G438456	chr2	234912516	234915036	0	5.19102	0	7.71523	0	0	0	4.59873	5.00103	0	0	0	0	0	3.19133	0	0	0	3.28339	0	3.35928
GRMZM2G179793	chr6	162544484	162548475	30.1972	51.9602	39.8767	63.9923	43.8706	29.1547	33.1446	46.6839	37.5778	0	52.7624	41.0506	40.9947	61.9157	35.1507	39.2808	36.3842	41.0398	40.7332	19.9632	38.8771
GRMZM2G059958	chr5	208426879	208429748	26.9031	20.1856	19.2674	22.526	20.0003	27.7491	27.4076	26.045	21.4638	24.4757	21.6816	22.3547	19.9431	25.7645	18.4125	18.8232	24.1335	17.5684	19.7449	18.385	17.0266
GRMZM2G140721	chr6	155610208	155616498	0	6.14223	11.9705	11.593	0	0	0	6.50982	2.17692	0	3.23141	3.60469	4.74516	7.55812	1.35843	0	0	0	1.83777	0	0
GRMZM2G380184	chr5	207060906	207063925	67.0522	93.2787	62.3534	99.5034	67.8466	75.8343	85.0441	85.865	80.327	56.3866	78.6489	67.9262	70.6425	79.1209	70.3242	83.3278	61.4636	74.1431	87.7928	64.8373	83.5131
GRMZM2G092517	chr3	184119670	184121779	7.35992	6.79083	7.5378	4.83618	0	6.54696	0	5.23749	5.93104	6.49782	5.34911	0	0	8.92027	2.91408	10.8826	0	5.73722	9.86215	0	7.42099
GRMZM2G347623	chr10	91780982	91788482	107.175	114.835	140.054	140.281	149.655	159.312	132.999	203.982	173.192	160.064	172.49	127.973	164.918	179.584	176.505	149.807	137.995	144.434	154.797	133.807	165.784
GRMZM2G135526	chr4	39593245	39595803	52.4737	66.2532	67.967	61.0052	29.2697	59.5984	31.8289	24.3009	27.7144	82.7846	58.8922	36.1229	27.4685	41.4578	19.4729	42.3887	74.9385	77.5925	72.405	37.8287	63.1962
GRMZM2G086497	chr5	6820316	6824037	160.599	208.466	214.501	239.632	143.094	255.672	132.26	206.01	198.493	138.815	156.656	133.117	169.636	249.569	179.421	254.448	174.052	218.623	237.78	185.818	214.139
GRMZM2G009448	chr10	17606895	17610628	761.021	842.718	668.08	694.721	720.054	715.487	892.236	896.686	816.097	782.532	710.077	718.35	752.707	757.01	754.498	835.17	866.739	537.832	675.584	679.706	760.58
GRMZM2G018941	chr1	51013924	51015964	795.792	799.001	1151.94	821.904	916.775	908.763	950.47	720.294	978.595	673.056	878.491	618.232	928.805	714.031	1139.3	747.709	831.503	899.435	702.522	688.324	999.498
GRMZM2G125839	chr7	131823185	131823872	0	0	3.1182	1.31075	0	0	0	1.26179	0	0	0	0	0	0	3.53926	0	0	0	2.84202	0	3.98314
GRMZM2G059799	chr3	210064861	210067453	30.5457	54.3341	40.8693	26.2828	96.3019	20.369	17.2761	11.9829	55.6509	10.2344	31.2718	49.1145	18.511	47.5544	48.8495	45.4563	0	89.569	54.1709	39.3121	45.4904
GRMZM2G072337	chr10	117565913	117569927	71.1432	77.7332	73.2262	78.08	75.2205	60.1121	58.904	95.7269	70.4088	60.0508	57.8391	51.3413	78.9164	70.5356	75.7858	78.7071	70.559	47.7563	70.148	56.532	58.4245
AC226203.1_FG002	chr5	203545697	203545991	0	0	0	0	0	0	0	0	0	0	0	0	0	0	0	0	0	0	0	0	0
GRMZM2G002492	chr1	23937121	23941732	31.8279	31.0074	30.9842	31.257	38.5301	31.2441	14.692	39.3852	34.0722	41.8957	29.5348	33.0533	43.6104	35.5395	30.4629	37.7796	30.8943	27.8318	26.1285	25.8581	44.0683
GRMZM2G006047	chr1	287110655	287111891	357.005	437.871	407.578	386.794	403.209	469.74	365.926	434.883	381.203	372.044	383.581	325.311	323.753	428.132	539.37	395.875	414.951	1040.56	1043.52	370.209	371.491
GRMZM2G017709	chr1	271332567	271336931	0	0	0	0	0	2.64662	0	3.88916	0	0	0	0	0	5.06435	0	0	4.26411	0	0	0	1.77187
GRMZM2G300141	chr4	39775452	39776283	11.3777	10.2205	13.6753	9.48066	12.6632	13.402	0	14.2352	14.7243	13.9077	13.1804	6.27155	10.3566	10.5793	10.0493	8.06095	17.2455	11.9847	8.92598	16.4549	25.7498
GRMZM2G142740	chr7	98245201	98250615	41.7433	61.9667	35.2566	56.8228	38.6741	47.026	47.038	55.3462	41.8532	30.2771	61.5667	64.2099	51.7625	53.4578	47.555	50.7563	63.603	32.0606	49.3015	61.6549	53.1161
GRMZM2G138252	chr10	90243492	90245202	2.75083	8.3967	4.63673	4.22514	6.74596	2.28717	7.26097	3.86011	4.71635	6.84803	4.28307	7.13913	0	6.71887	4.30344	3.98103	4.4173	0	5.50538	0	2.73265
GRMZM2G066222	chr4	217521315	217523853	2134.35	1726.68	1565.07	1625.21	1446.86	1840.52	2172.31	2418.98	1521.17	1748.45	2028.53	2031.91	1807.11	1600.48	1310.4	1841.63	1762.66	1345.96	1252.95	2027.33	1780.38
GRMZM2G493155	chr4	167280816	167291387	0	0	0.650258	3.45689	0.902016	4.46922	2.75918	0.527521	0.730909	0	1.86442	1.85697	0	0.861263	1.05441	0	0	0	2.10725	1.8019	1.94058
GRMZM2G333591	chr2	223324495	223328181	0	0.23974	0.139448	1.47896	2.16267	0.879813	0	0.0958168	1.02255	0	0	0	0	0.715835	0.55949	1.08094	0	0	0.610242	0	0.8165
GRMZM2G029079	chr2	138313880	138317615	0	8.38069	0.1822	7.94976	14.3022	15.41	16.227	7.86577	8.09617	11.8206	17.2233	11.1969	18.0695	9.28003	22.5302	4.46587	12.6307	19.1119	14.9877	13.361	17.9031
GRMZM2G050875	chr6	105150654	105157124	0	51.5036	27.2839	10.4869	53.7318	20.1055	20.8955	13.3833	29.0845	10.1385	10.5234	12.0638	0	62.2857	56.2441	55.3827	37.5834	11.1835	56.1791	7.11387	79.6532
AC195340.3_FG004	chr5	5377799	5382786	61.5597	32.1893	54.3353	21.6075	45.9824	42.5447	29.7027	40.7915	54.5544	43.2172	28.6973	28.6312	34.7783	66.351	38.4863	23.1487	49.0241	82.2146	50.082	43.8939	35.4484
GRMZM2G054120	chr6	102290588	102293242	225.461	119.504	171.703	208.562	159.389	178.905	137.029	148.43	226.853	132.394	176.654	209.144	124.756	154.761	196.574	212.754	307.556	194.17	220.877	195.788	175.006
GRMZM2G079417	chr5	32351788	32353850	0	0	0	0	0	4.63986	0	5.29748	0	0	0	0	0	0	0	0	0	0	0	0	6.22446
GRMZM2G002100	chr6	74598822	74604163	174.577	199.182	191.564	197.449	183.699	210.609	150.336	200.274	190.781	188.454	159.72	167.934	151.926	181.278	182.653	201.128	174.228	179.35	189.957	184.671	211.796
GRMZM2G064608	chr5	215992803	215994857	53.7067	72.905	73.8616	73.7312	49.0517	54.5675	56.9771	64.0053	63.1649	58.7516	55.5047	39.8916	51.0567	47.6222	53.4	64.916	63.2533	52.6893	41.0448	54.7592	71.7445
GRMZM2G115939	chr5	56740172	56751799	192.727	205.238	200.476	203.919	182.823	174.05	209.312	205.512	221.01	189.1	230.847	228.332	234.27	222.744	224.381	180.902	222.622	221.476	213.565	206.948	244.82
GRMZM2G373247	chr7	127257115	127258834	0	0	0	0	0	0	0	0	0	0	0	0	0	0	0	0	0	0	0	0	0
GRMZM2G703462	chr1	1754286	1754598	0	0	0	0	0	0	0	0	0	0	0	0	0	0	0	0	0	0	0	0	0
GRMZM2G167560	chr4	165314096	165318410	5.67409	9.95506	9.06788	8.59535	14.9552	10.7874	12.0148	9.28928	4.36045	6.97598	6.90246	9.11506	9.0006	4.80889	9.61755	10.9445	5.81368	6.61695	7.33474	5.72784	13.9291
GRMZM2G015881	chr3	195416507	195423273	63.9292	58.1836	44.1285	50.2229	39.2802	56.1228	49.8571	56.0303	61.8855	65.5962	69.9796	58.4954	49.7663	47.8215	38.147	46.6001	51.5782	58.1359	75.8035	62.14	68.6264
GRMZM2G123387	chr2	21500614	21505542	5.33991	4.80319	3.66634	8.71918	6.83953	10.0803	8.42516	10.3813	6.38108	6.10225	7.54176	0	0	13.1522	7.12724	4.12863	6.07609	0	10.2942	8.83954	7.92123
GRMZM2G156174	chr10	141564223	141572393	50.3194	54.7826	53.0884	53.3547	36.5037	48.8326	44.1702	60.688	33.6077	41.0631	49.453	57.2643	34.1178	55.7778	42.5111	48.2695	42.0496	53.5048	54.2054	45.1141	56.0837
GRMZM2G306079	chr1	106496169	106499418	44.99	77.1378	44.1832	44.8221	58.6357	60.7443	87.1777	71.5418	42.414	57.3993	45.7569	39.2062	33.8527	37.8938	36.8321	45.5036	86.6048	60.6798	57.4232	48.843	45.4014
GRMZM2G177575	chr2	83267689	83272352	57.5565	49.2842	37.7931	46.3828	27.3063	35.7397	50.5046	40.9907	45.4255	46.1352	57.042	56.6845	43.4298	40.0223	23.9971	48.2032	38.2894	23.0286	39.4523	63.4991	39.6557
GRMZM2G125656	chr10	139316024	139319484	25.2521	49.4139	24.8797	34.7435	46.9993	50.4989	37.6271	51.3788	47.44	43.2429	36.5517	33.9367	41.6912	37.6307	48.2032	43.6929	36.1406	30.3719	43.8659	38.1596	40.2042
GRMZM2G454018	chr1	120903846	120904701	0	9.32918	0	0	0	0	0	0	0	0	0	0	0	0	0	0	8.034	0	0	0	6.72954
GRMZM2G499601	chr1	178691218	178691937	0	0	0	0	0	0	0	0	0	0	0	0	0	0	0	0	0	0	0	0	0
GRMZM2G321053	chr1	6198213	6201153	65.1799	90.6342	54.3639	111.371	46.0541	71.79	66.3669	61.5564	32.9788	68.186	129.177	45.297	39.2439	52.0828	62.1445	117.766	128.682	100.628	167.978	70.4769	111.133
GRMZM2G132971	chr1	287715095	287719302	118.57	173.558	153.187	147.521	213.61	110.177	147.4	120.024	214.437	129.162	171.933	143.445	153.139	157.617	216.544	156.161	115.952	124.506	222.349	103.283	175.223
GRMZM2G080930	chr5	213034924	213038562	116.156	88.3053	74.0584	90.9739	82.4814	87.4588	85.6976	73.9199	77.8179	73.9019	83.8663	6.89509	106.557	65.9172	77.6054	115.728	55.1901	67.3292	106.627	105.69	83.3231
GRMZM2G453956	chr2	227604053	227608803	7.83862	7.77172	10.681	11.9227	7.91592	10.0525	13.2456	15.4994	6.45531	6.19734	19.2907	8.01854	9.11922	14.0902	13.2029	10.6972	14.9242	8.38353	14.9186	10.8881	8.55115
AC205008.4_FG002	chr7	21633431	21636570	4.70586	3.89346	4.66374	0	6.14227	6.06887	3.91604	1.8056	10.1506	5.82899	4.39775	0	0	7.99556	0	4.39494	1.5104	6.06009	1.27456	0	1.68212
GRMZM2G136113	chr1	14674719	14683555	28.4379	31.6269	34.3352	34.7777	43.6703	43.5527	41.3293	43.0785	47.616	41.6837	39.8323	44.2174	49.8462	39.9944	37.5561	48.3698	26.7225	30.2336	33.7709	34.4101	45.1961
GRMZM2G092672	chr5	179931539	179933734	2.90787	6.70376	6	2.44124	0	4.69175	0	1.99173	0	0	0	0	0	2.66482	0	5.43079	0	0	0	0	1.19175
GRMZM2G312244	chr3	186210052	186213894	36.8503	29.7358	34.1745	27.9612	15.6453	34.4781	42.8332	31.4266	36.4288	17.3007	36.1896	74.3826	19.3703	46.727	49.5783	34.6452	13.5737	10.1785	35.3278	25.6685	29.5087
GRMZM5G849152	chr6	58710595	58712040	0	0	0	7.58916	0	0	1.72545	2.34288	9.85725	4.79802	1.03136	0	0	0	6.29686	0	0	7.91102	1.122	0	6.11664
GRMZM2G061018	chr3	2940348	2945791	17.7338	22.5773	13.3677	20.5601	23.5084	14.1926	8.86995	41.3615	17.4083	23.2218	17.4014	11.0052	13.2725	19.6656	19.0448	16.99	22.5295	22.4955	23.7775	23.6729	21.2105
GRMZM2G066801	chr1	252803989	252817210	100.294	126.087	102.52	122.813	319.82	40.7328	137.796	113.754	70.1841	165.714	95.6	67.8517	156.399	142.293	110.503	134.623	141.882	134.442	125.535	90.7146	168.918
GRMZM2G000177	chr8	147431765	147436951	75.3894	93.0707	70.334	107.902	73.5077	86.2288	63.3716	85.0446	69.1048	76.2756	68.7934	81.901	64.5403	90.1965	83.5739	90.8639	57.9197	63.7121	59.6322	73.0682	77.3559
GRMZM2G047324	chr3	213774508	213775044	0	0	0	0	0	0	0	0	0	0	0	0	0	0	0	0	0	0	0	0	0
GRMZM2G070693	chr4	45266239	45269925	231.329	382.275	362.644	336.413	353.199	305.219	176.904	347.711	356.867	243.485	264.046	224.79	363.096	316.08	359.609	350.698	281.921	287.695	315.847	263.153	319.314
GRMZM2G090697	chr9	26307775	26316029	0	0	0	0	0	0	0	0	0	0	0	0	0	0	0	0	0	0	0	0	0
GRMZM5G816110	chr6	159398665	159401207	182.406	117.4	96.542	93.52	74.8193	107.394	124.856	95.9323	61.3644	102.332	169.786	112.298	57.0305	109.384	46.1141	94.8518	130.245	62.0606	86.5368	203.231	100.148
AC209051.3_FG003	chr5	170765923	170768961	0	0	0	0	0	0	0	0	0	0	0	0	0	0	0	0	0	0	0	0	0
GRMZM2G031721	chr10	130307183	130310968	81.7149	98.7983	72.8465	45.9093	32.9086	47.0633	54.4117	54.7021	38.3396	41.7343	67.0451	37.6381	34.8686	65.9154	82.6267	75.2273	59.4299	20.8358	50.6964	50.4403	51.3893
GRMZM2G009353	chr10	63553741	63558734	60.9736	115.868	68.0722	86.5369	84.9309	127.197	86.835	130.605	92.2878	119.919	82.9931	136.204	85.1331	120.344	84.6233	94.213	102.115	123.851	88.5198	135.726	161.703
GRMZM2G005996	chr5	193651779	193655999	7.96304	9.0331	13.147	12.2259	25.1661	9.03533	11.7595	6.42477	16.7198	10.2368	9.15723	8.81698	11.9547	8.63059	21.8047	2.77986	6.17715	26.7552	6.99964	9.73314	19.2655
GRMZM2G013957	chr1	48657508	48660814	340.838	322.583	373.796	424.622	268.791	294.159	191.776	377.159	349.155	167.822	277.309	272.661	307.104	354.427	167.146	229.244	187.383	346.969	244.606	117.094	155.625
GRMZM2G168506	chr5	34092742	34098884	123.937	167.404	194.585	184.293	111.657	148.699	80.1556	88.3459	92.1151	129.685	86.3195	93.0006	104.018	114.393	96.2288	109.963	102.232	133.209	127.702	138.997	140.838
GRMZM2G335564	chr2	172077359	172082637	1.64104	3.74243	3.50191	4.89771	2.93332	3.95571	3.48889	2.50166	4.08773	1.73233	2.01688	0	1.72859	2.62246	4.12967	2.8101	3.27522	5.22879	5.3845	0	3.01061
GRMZM2G465208	chr10	132254133	132256476	7.4184	10.491	8.64791	9.93309	5.01163	7.15491	8.93612	8.10346	6.99942	9.71323	4.77646	5.6558	7.77746	8.92497	8.99933	8.88476	6.38865	8.50539	8.8345	5.11881	8.78416
GRMZM2G443740	chr2	129611401	129614454	0	0	0	0	0	0	0	0	0	0	0	0	0	0	0	0	0	0	0	0	0.287276
GRMZM2G480171	chr10	144603176	144611848	112.649	122.369	93.8849	164.966	106.406	170.53	157.762	130.794	175.88	96.1753	173.298	120.141	161.453	134.844	184.829	133.236	151.963	114.907	135.248	137.8	136.315
GRMZM2G177901	chr5	68194781	68195507	0	8.64605	0	0	0	0	0	11.495	0	21.0384	0	16.9409	27.531	0	3.86933	11.997	0	0	9.75922	0	15.3609
GRMZM2G022706	chr6	91298857	91300281	4.48532	2.8816	4.2656	0	0	0	0	3.09451	0	0	0	0	0	0	0	0	0	0	0	0	0
GRMZM2G038922	chr1	166808203	166810410	56.4651	54.6193	54.8104	69.1118	35.451	21.7852	103.66	67.1065	103.603	65.6289	69.3705	81.4338	16.5104	17.8244	69.3104	60.0864	81.0467	58.4934	58.3057	77.2286	53.0828
GRMZM5G842214	chr1	193147281	193148642	0	0.498265	0.46599	0	0	0.759204	0	0.610844	0	0	0	0	0	0	0.501242	0	0	0.390032	0.377268	2.80988	0.409111
GRMZM2G077436	chr6	168092745	168094787	143.412	134.092	164.716	157.862	173.896	114.281	116.259	128.865	123.481	128.52	131.567	63.3319	138.835	316.287	140.993	130.521	141.844	130.44	244.252	102.708	145.302
GRMZM2G317835	chr3	24446066	24451647	33.57	33.6049	26.5103	53.3044	34.4033	47.0005	35.0558	36.8196	42.8431	30.8631	40.3921	35.7477	29.34	43.5831	35.9794	41.2277	36.5721	33.8664	40.2242	31.6101	36.1316
GRMZM2G450825	chr1	234648986	234652195	0	8.47108	7.96984	8.77147	3.68216	7.65485	2.7754	3.51064	5.78832	0	0	0	0	3.36	3.56839	4.66164	0	9.35326	5.89619	0	3.45346
GRMZM2G450308	chr1	111633134	111634199	0	0	0	0	0	0.657323	0	0	0.53523	0	0.235514	0	0	0.621918	0.0729184	0.233427	0	0	0	0.932572	0
GRMZM2G158682	chr1	87764815	87767125	32.6359	40.9316	142.16	13.2461	23.0315	66.2562	55.3107	33.9305	24.9125	22.1137	15.7063	56.3994	58.7284	69.5053	18.3259	59.2967	54.7898	73.4653	111.913	6.95823	66.0635
GRMZM2G312419	chr8	2761692	2763484	4.53726	3.04062	7.98495	4.7876	7.81419	4.03022	7.0881	3.94528	4.70187	8.52584	5.78732	6.22726	0	4.18114	5.25493	0	3.65112	0	3.9589	0	4.21018
GRMZM2G054267	chr7	13959158	13960453	21.5089	47.7193	89.8535	10.0306	38.0146	14.157	30.4017	41.1794	38.6528	14.5735	23.1656	0	0	34.5404	47.5793	29.0842	103.021	18.7784	74.1899	14.0377	41.1878
GRMZM2G153536	chr1	29512427	29515645	134.588	201.971	95.6798	126.177	192.732	79.5819	58.239	61.8302	62.6773	48.0895	163.164	128.262	96.4887	138.301	59.0039	197.049	128.386	353.874	27.3833	148.662	186.786
GRMZM2G378665	chr5	205783381	205786772	0	3.87109	6.85005	10.5196	6.3302	0	9.55501	8.2381	4.4515	6.99124	11.024	9.85301	0	7.35524	13.7675	8.64844	9.23342	5.55312	5.32498	0	7.31702
GRMZM2G127312	chr8	18684443	18686910	229.993	254.979	251.81	247.74	229.912	243.795	296.743	248.454	219.462	264.624	330.407	363.168	221.691	223.717	247.339	223.478	299.01	216.05	216.077	288.533	260.874
GRMZM2G308735	chr9	122838663	122839919	0	0	0	0	0	0	0	0	0	0	0	0	0	0	0	0	0	0	0	0	0
GRMZM2G073888	chr8	79279729	79285740	57.3222	77.1309	57.7265	67.0223	49.5715	77.2557	55.8461	70.5088	56.4323	59.5308	47.1846	68.6158	61.1921	71.7514	56.5204	52.4062	69.402	56.6801	79.142	63.6433	83.9657
GRMZM2G156218	chr9	26961328	26966351	78.2532	85.8428	138.547	134.221	63.0709	109.545	91.2056	153.579	175.004	32.5092	153.663	109.994	137.214	173.13	79.7413	121.735	44.9264	123.052	50.7249	161.423	55.7503
GRMZM2G145709	chr3	153929296	153935149	155.282	127.633	158.098	161.556	121.898	159.646	150.917	113.256	153.392	160.529	166.731	140.925	154.439	156.821	153.923	136.499	165.529	165.849	149.43	137.531	119.294
GRMZM2G453111	chr1	12343877	12348542	13.3198	13.1887	12.9554	10.4458	12.6664	22.6195	12.2831	19.5073	27.3543	22.0356	16.7468	15.7981	12.7823	18.8176	28.8598	19.159	14.0917	13.1048	17.8531	14.7419	13.7272
GRMZM2G308884	chr9	110578510	110585943	0	8.24529	4.12798	5.29912	4.45335	8.57833	4.63012	6.57268	4.33367	3.95563	5.99616	0	5.68101	2.57548	7.05482	4.03858	5.43822	7.09645	8.00308	9.03141	4.58665
GRMZM5G849889	chr9	61339611	61340445	13.1601	0	18.0491	18.027	0	19.0071	0	20.2278	8.29274	0	0	19.4618	0	12.7248	0	0	0	0	13.2552	0	0
GRMZM2G117244	chr7	118909790	118911320	6.55023	20.6883	10.0958	7.37507	0	6.12236	6.3091	4.5491	6.25553	8.24371	5.1177	12.8995	0	10.2954	5.029	3.38554	11.9695	7.20612	4.98107	8.22196	5.20683
GRMZM2G051403	chr5	7698035	7699925	273.739	320.624	261.531	233.846	213.305	230.075	303.673	255.896	256.472	233.175	459.231	236.225	201.909	305.854	191.72	296.954	227.257	226.141	283.776	326.924	250.587
GRMZM2G098569	chr3	205146238	205150759	43.9314	82.3161	59.5412	84.9339	117.832	68.0424	61.3263	69.7653	49.2835	64.6953	96.6518	79.9376	96.7948	54.926	85.4102	94.215	90.5563	71.6973	92.6803	39.4515	77.5599
GRMZM2G062416	chr2	174978253	174983525	60.7867	70.3216	67.6994	80.5635	66.5041	73.0014	89.6232	99.4082	63.8031	52.1405	46.796	47.8227	74.8493	61.4753	57.5939	112.836	58.5579	40.5188	59.2159	63.3446	37.2276
GRMZM5G863375	chr1	276561907	276562870	0	0	0	0	0	0	0	0	0	0	0	0	0	0	0	0	0	0	0	0	2.41732
GRMZM2G459391	chr1	214237748	214244496	172.801	247.949	231.617	149.663	146.621	156.881	202.471	152.01	291.248	128.203	306.459	100.863	184.241	280.338	267.012	156.569	147.535	173.754	243.699	117.054	239.73
GRMZM2G170232	chr4	36926961	36928874	0	1.46677	0	0	0	0	0	0	0	0	0	0	0	0	0	0	0	0	0.472172	0	0
GRMZM2G336557	chr8	169191126	169192661	0	5.76678	4.62694	4.2904	0	0	0	3.99892	3.39888	0	8.84553	0	0	4.24801	5.60557	11.385	7.20942	0	6.7815	0	6.83508
GRMZM2G070054	chr2	153927068	153942627	165.302	182.518	164.569	218.583	184.624	195.09	157.306	249.755	204.241	163.773	191.13	170.052	168.009	229.872	190.957	223.157	197.871	188.811	202.952	176.634	201.429
GRMZM2G009323	chr10	145794455	145798655	112.831	135.632	84.1311	116.219	92.2981	118.165	119.346	143.038	123.402	122.278	96.3193	116.9	95.1636	98.7704	120.315	91.3511	99.8498	99.0993	91.604	130.989	125.62
GRMZM2G170588	chr5	201671160	201672096	0	0	0	7.68511	0	0	20.6167	0	0	0	0	0	0	12.4174	0	0	0	0	9.48547	0	0
GRMZM2G449817	chr6	104671216	104674448	20.2355	23.2475	34.4342	26.3262	39.2976	37.3642	20.9734	22.7928	24.79	32.5383	25.1871	27.2589	29.296	21.4064	23.4271	27.9336	35.3847	37.4764	33.014	17.3866	21.1004
AC187279.3_FG003	chr6	48607337	48607664	0	0	0	0	0	0	0	0	0	0	11.3286	0	0	0	0	0	0	0	0	0	8.83278
GRMZM2G523904	chr1	234589718	234590620	0	0	0	0	0	0	0	0	0	0	0	0	0	0	0	0	0	0	0	0	0
GRMZM2G307119	chr7	172207716	172209213	0	0	0	0	0	0	0	0	0	0	0	0	0	0	0	0	0	0	0	0	2.80909
GRMZM2G504123	chr3	28910837	28911160	0	0	0	0	10.5123	0	10.1209	11.0298	0	9.70167	9.14226	0	12.3719	0	0	0	0	0	16.4974	16.2408	7.27739
GRMZM2G033126	chr3	12976770	12989585	32.1288	17.2784	13.6632	4.16466	0	23.8455	21.2093	18.0066	30.2879	6.85379	15.0769	11.0877	10.8452	22.3014	14.5585	37.6661	7.9439	34.4462	13.1683	10.302	15.7084
GRMZM2G554145	chr8	137562181	137562847	0	0	0	0	0	0	0	0	0	0	0	0	0	0	0	0	0	0	0	0	0
GRMZM2G060507	chr9	153738013	153741717	85.2704	55.7204	93.6949	44.7305	30.9693	60.1328	46.3847	68.1648	61.3782	47.002	60.9726	43.2755	24.1604	55.4654	34.6397	27.0785	64.2416	84.6917	63.1203	87.6349	92.628
GRMZM2G094100	chr3	98445941	98448684	6.13079	8.21821	7.0166	8.46307	9.59578	6.87531	12.0611	10.8051	4.73999	5.86106	3.27566	13.3962	7.30011	8.22234	7.12996	6.90247	6.6953	6.83292	5.89132	9.27368	8.53269
GRMZM2G371229	chr4	100159131	100160125	0	0	0	0	0	0	0	0	0	0	0	0	0	0	0	0	0	0	0	0	0
GRMZM2G128301	chr9	125997832	125998439	0	0	0	0	0	0	0	0	0	0	0	0	0	0	0	0	0	0	0	0	0
GRMZM2G140549	chr1	28381773	28386048	6.64005	2.43624	5.44581	4.34614	5.96608	4.29199	0	5.26952	6.6977	7.15991	5.51637	6.57569	4.40563	7.15888	8.59652	9.12292	7.05333	5.7951	5.92968	0	5.21656
GRMZM2G386824	chr7	175743163	175751817	59.4823	24.1599	53.3601	65.1916	63.9551	60.7431	28.4908	44.8158	56.5545	52.0044	72.2127	41.7122	45.4567	37.3906	60.7633	26.0342	18.7452	53.768	51.8098	71.5764	28.778
GRMZM2G302160	chr4	37012174	37016207	28.1749	20.5439	28.4099	25.8292	21.5929	21.3577	25.1349	32.121	28.6857	24.5214	26.7656	24.7467	15.3254	24.9955	25.1838	22.928	19.1978	18.5185	20.8549	25.4593	23.4839
GRMZM2G172575	chr10	2633012	2634016	0	0	0	0	0	0	3.01664	0	0	0	0	0	0	0.842913	0.795948	0	0	0	0.718912	0	0.69111
GRMZM2G317596	chr6	164675304	164676313	0	0	0	0	0	0	0	0	0	0	0	0	0	0	0	0	0	0	0	0	0
GRMZM5G851266	chr10	59660106	59662383	137.213	276.965	468.924	56.5549	303.198	383.663	278.139	814.45	57.3914	196.109	354.676	416.424	394.392	193.969	479.802	93.8385	133.534	376.944	82.5225	378.469	134.136
GRMZM2G008556	chr6	115639608	115647217	69.1088	91.241	90.3254	91.6478	70.8385	81.3293	70.0474	91.6624	77.8216	69.0083	75.5041	66.8689	76.5889	77.2662	72.745	95.9238	74.7444	62.7886	68.1726	68.7164	88.51
GRMZM5G837022	chr6	14783629	14783812	134.524	136.732	165.964	198.236	148.065	141.719	111.286	151.072	534.502	0	0	0	91.8693	110.94	0	176.01	0	0	123.954	0	140.942
GRMZM2G554653	chr6	121070612	121076652	0	0	0	0	0	0	0	0	0	0	0	0	0	0	1.92838	0	0	3.18427	0	0	2.15977
GRMZM2G131508	chr4	2027828	2029561	0	0	0	0	0	0	0	0	0	0	0	0	0	0	0	0	0	0	0	0	0
AC211477.3_FG021	chr5	2287644	2288521	0	0	0	0	0	0	0	0	0	0	0	0	0	0	0	0	0	0	0	0	0
GRMZM2G003501	chr4	166828994	166830916	242.421	465.358	393.141	625.967	451.935	644.608	681.714	375.873	687.157	343.413	399.654	205.964	622.908	532.578	782.245	367.15	415.385	314.219	715	298.397	362.971
GRMZM2G458533	chr1	295459223	295465426	11.3889	18.8815	16.5367	30.8359	16.0858	29.9665	34.8302	23.9175	32.3282	27.0669	22.5622	15.1145	26.307	18.3767	24.5706	14.5585	15.2445	12.5006	19.6251	32.9139	17.6746
GRMZM2G016184	chr5	14335600	14339846	97.7856	113.444	126.643	131.452	102.6	138.341	93.1497	116.729	127.518	85.0363	119.51	88.1851	111.555	121.313	106.532	116.363	80.2416	112.736	123.127	120.38	140.755
GRMZM2G022368	chr3	219253224	219253910	31.114	38.7131	26.5447	36.8594	0	29.0612	70.6169	27.2457	21.1491	33.3556	24.9992	29.9078	0	28.8453	20.05	25.0322	22.7351	35.5058	37.1703	17.4944	47.3571
GRMZM2G311390	chr2	230012826	230015192	1.01929	1.00358	1.27297	2.69743	1.35828	1.92108	1.71111	1.93011	1.02107	2.01019	1.94792	2.08914	1.84301	1.5057	1.45231	2.33203	2.05386	1.41665	2.25019	1.06822	2.83838
GRMZM2G110851	chr1	299095173	299097180	19.601	18.1018	14.1718	12.8983	16.0344	17.8192	16.2279	18.4665	15.9907	19.719	15.7652	20.0221	12.4174	15.8473	14.3634	15.893	19.7019	9.67403	8.69577	16.5039	13.4577
GRMZM2G142565	chr10	59438072	59449035	57.5216	83.1385	59.0904	76.0821	54.7029	71.2335	75.1695	79.1005	64.0753	77.0357	84.0247	67.5526	43.3371	76.1175	55.858	81.349	90.8097	49.8662	71.8687	73.1107	66.9598
GRMZM2G120304	chr3	31898225	31901626	707.95	1072.62	1005.81	825.486	1389.55	947.994	1056.34	927.02	1812.43	1387.66	1020.52	857.758	1285.77	919.07	1558.36	1185.71	883.26	1379.66	1153.47	1032.11	1175.02
GRMZM2G098857	chr5	87119123	87122507	80.757	78.5452	87.9884	97.2051	94.804	39.7328	100.279	149.218	99.8361	102.688	101.063	82.6296	90.5816	103.06	125.724	99.9696	74.5726	88.2724	137.28	80.2792	124.112
GRMZM2G060949	chr4	14521570	14540846	0	0	0	0	0	0	0	0	0	0	0	0	0	0	2.37223	0	0	0	0	0	0
GRMZM2G124239	chr9	123411698	123426029	132.905	322.076	206.564	227.673	192.483	209.401	202.108	201.959	194.996	204	183.91	246.605	228.643	204.384	176.306	176.33	195.978	158.22	183.856	160.777	187.809
GRMZM2G027253	chr6	56452295	56452970	0	0	0	0	0	0	0	0	0	0	0	0	0	0	0	0	0	0	0	0	0
GRMZM2G310321	chr9	126675363	126676737	62.8016	52.0191	82.3955	48.3021	54.7074	23.9856	31.4959	46.9144	34.2037	43.2668	43.858	58.5015	58.1681	55.0494	45.3151	52.1714	49.6569	65.2619	60.5603	69.8805	44.6569
GRMZM2G701193	chr6	151702966	151710164	53.8421	48.2373	62.3027	56.7709	39.0909	49.3403	50.4871	91.498	62.484	40.9561	72.0754	57.0539	55.463	65.9395	57.6123	63.2243	53.1798	97.6838	40.2313	47.5052	102.06
GRMZM5G896790	chr8	50195673	50196176	0	0	0	0	0	0	0	0	0	0	0	0	0	0	0.53201	0	0	0	0	0	0
GRMZM2G042055	chr2	7290713	7293868	82.8486	79.7833	96.376	72.6065	93.2784	66.8256	50.9889	81.9979	75.4018	63.3696	68.8151	49.7471	44.1815	65.1358	66.8031	67.5412	56.8565	74.8954	66.8521	53.0485	59.1708
GRMZM2G527074	chr1	248003159	248003592	0	0	0	0	0	0	0	0	0	0	0	0	0	0	0	0	0	0	0	0	0
GRMZM2G034963	chr3	4576985	4577839	0	1.72424	0	3.9795	0	0	0	0	0	0	0	0	0	1.74688	1.37058	3.21599	0	0	2.69475	0	0
GRMZM2G301904	chr7	133030147	133039017	18.3213	3.75278	4.06052	6.52078	17.1373	5.721	6.33413	19.6175	5.59785	4.48514	4.87892	16.3372	0	5.76925	19.0617	20.8543	18.4633	4.95745	20.2321	5.33976	4.06479
GRMZM2G115518	chr5	60801753	60808528	86.8772	63.3902	92.3397	76.1877	84.2088	80.4814	63.8348	51.7225	61.3596	69.6664	75.2861	109.375	74.163	54.8328	80.6695	70.8779	80.9456	120.693	71.3971	83.9891	81.4701
GRMZM2G459052	chr6	96677376	96678335	20.8436	16.1682	16.7768	22.1583	10.2628	0	14.5637	0	0	17.9118	0	8.76294	0	6.52583	22.7679	4.61209	0	0	0	0	11.3688
GRMZM2G062391	chr1	56215992	56221441	65.3054	58.5698	68.8316	60.8864	51.8606	66.9735	74.252	60.0649	47.8133	44.4608	51.6846	28.9649	51.6493	65.9654	69.254	55.5665	56.5137	59.2553	81.6094	39.4879	53.6102
GRMZM2G051720	chr7	55612268	55614013	19.1359	38.0308	34.1791	0	22.4534	35.647	18.4334	20.1734	42.6125	28.3155	19.0999	0	23.3272	30.7311	29.3526	26.8618	18.4656	0	7.55659	21.7537	25.2813
GRMZM2G067424	chr10	146643279	146645035	1.46388	1.49115	1.48577	0	0	0	0	0	4.45734	0	5.1813	0	0	0	2.06437	0	0	5.93406	2.67275	0	0
GRMZM2G342327	chr5	215933345	215938329	25.8566	35.8152	44.2253	39.6754	33.3043	40.0346	21.5016	47.4168	37.7732	30.5905	29.4468	29.9836	39.8224	36.3404	47.3586	45.6818	19.3532	21.992	41.5775	30.756	35.4882
GRMZM2G074914	chr2	57659584	57662192	7.2677	4.07481	67.4325	32.644	9.97	44.9056	64.8945	30.6278	56.6165	51.0202	11.7133	52.0594	68.6919	6.17649	19.0964	61.026	3.51388	70.6277	28.5054	42.947	15.3415
AC206898.3_FG006	chr5	32435596	32438520	0	0	0	0	0	0	0	0	0	0	0	0	0	0	0	0	0	0	0	0	0
GRMZM2G135244	chr8	171942324	171943122	0	0	0	0	0	0	0	0	0	0	0	0	0	15.3348	0	0	0	0	0	0	0
GRMZM2G168681	chr8	63271713	63275991	245.183	346.676	286.614	251.407	200.634	254.147	197.547	264.681	263.562	192.221	215.172	260.572	192.085	228.879	227.223	337.453	165.445	214.843	209.397	248.437	240.904
GRMZM2G430601	chr2	145042979	145044654	1.52498	1.96466	2.90657	4.06273	4.31822	3.63472	2.94092	4.00329	5.71602	3.21504	2.242	4.17272	0	2.67392	5.05237	4.18145	3.84505	3.23339	1.90757	3.22539	3.44116
GRMZM5G886006	chr5	211940414	211942150	40.687	32.5044	36.9527	41.5487	45.2177	25.2244	24.1526	6.58591	3.46468	33.4811	7.29899	14.1606	14.423	13.2913	22.0751	14.7228	32.6741	42.9442	9.92119	35.9018	22.3814
GRMZM5G864065	chr10	96910667	96912795	6.68623	4.20584	2.5336	1.71819	2.09384	11.1713	0.989492	3.35328	1.32753	0.400963	3.77971	1.08077	4.06775	2.17698	1.20553	2.05421	0.33999	12.5216	11.3541	0.580732	2.23323
GRMZM2G031331	chr2	46437781	46442878	14.6756	12.5978	16.373	12.7775	4.70875	11.4996	9.6715	9.58736	10.2464	0	6.89852	0	8.53644	8.04509	7.38819	11.7624	11.054	11.6501	13.9687	13.0904	20.0051
GRMZM2G040843	chr10	300425	310885	143.69	185.191	132.947	151.524	151.739	198.532	205.082	201.015	186.572	149.829	223.687	131.278	183.887	243.054	167.946	190.591	142.149	133.779	188.916	133.372	182.21
GRMZM5G845775	chr5	204367856	204373194	7.61647	6.50423	4.36825	6.90855	22.9567	8.48983	18.561	9.4793	8.4012	4.54425	7.36958	6.13801	6.47174	7.14779	6.1376	4.5326	14.9595	5.08556	4.34839	4.9872	19.2775
GRMZM5G892522	chr10	148101347	148102945	62.5548	52.0031	58.3494	60.6778	62.6612	48.3025	68.6493	41.6892	80.0531	72.9499	98.1388	50.3734	53.4577	89.9207	121.439	77.4505	154.194	54.9245	102.76	106.717	76.4994
GRMZM5G803419	chr2	200569354	200570304	0	0	0	0	0	0	2.71106	4.50652	0	0	0	0	0	0	9.29301	0	0.945703	0	0	5.33427	6.96207
GRMZM2G574758	chr5	210015988	210017885	0	0	0	0	0	0.0850805	0	0	0	0	0	0	0	0	0.157087	0	0	0	0	0	0.0624454
GRMZM2G025227	chr5	1457561	1462915	186.629	181.448	242.666	208.886	255.491	235.488	230.041	218.039	216.418	232.557	173.677	249.212	191.941	234.653	372.69	195.978	196.539	223.122	205.466	274.025	87.9923
GRMZM2G037185	chr4	235163241	235166429	232.533	235.839	228.682	210.009	233.681	255.664	182.516	271.006	209.397	217.722	221.78	228.165	269.093	275.136	185.724	249.195	215.087	199.217	275.664	187.224	278.144
GRMZM2G037444	chr7	164824656	164829482	61.9517	60.9263	53.9827	61.871	70.9051	63.7416	66.8596	66.1065	65.6717	70.1011	63.774	79.5493	74.003	66.5894	73.04	59.2922	69.168	70.9405	64.6907	54.7893	75.5283
GRMZM2G081977	chr1	149708691	149715244	9.40857	8.99835	9.5003	10.3283	12.8355	10.343	12.0607	15.4645	10.6892	14.2658	8.30659	11.7998	15.318	9.53179	23.2641	11.0722	17.5175	6.21415	17.3723	6.27171	10.2592
GRMZM2G397281	chr4	202103198	202105072	0	0	0	0	0	0	0	0	0	0	0	20.7292	0	3.58309	3.8986	0	10.8352	0	0	0	2.63437
GRMZM2G021514	chr5	210254836	210260538	5.56898	9.94899	9.15361	8.98686	14.4557	15.7671	9.89981	12.2821	44.6586	6.71162	33.8381	32.7886	32.9712	57.9377	54.5611	10.4276	9.22412	12.1573	12.2528	10.846	10.8582
GRMZM2G086072	chr1	11481330	11488611	22.7159	25.687	31.3546	29.8743	28.5398	29.0349	21.9137	29.7674	23.6351	28.5068	27.7856	26.3893	29.9703	35.4165	33.2927	35.4513	24.8971	40.5968	38.5489	18.0289	29.6279
GRMZM2G320111	chr1	3734664	3735389	0	0	0	0	0	0	0	0	0	0	0	0	0	0	0	0	0	0	0	0	0
GRMZM2G150323	chr9	83960067	83965504	105.439	115.845	133.288	125.429	132.036	114.727	107.061	97.3622	146.481	150.768	91.3623	115.242	133.46	95.6192	118.705	106.57	91.9279	116.837	128.043	127.38	121.65
GRMZM2G332562	chr5	101296924	101300500	72.9983	110.302	95.0787	110.856	116.674	99.6743	136.015	95.8141	102.109	102.657	95.7453	100.205	102.525	101.862	107.653	118.605	96.8743	224.455	106.503	95.0301	117.423
GRMZM2G072156	chr1	289060500	289067681	177.822	121.929	114.667	150.717	144.836	138.059	114.372	163.245	102.889	127.987	137.254	126.216	140.058	128.725	166.411	144.063	133.826	85.5944	121.35	210.432	189.958
GRMZM2G065040	chr7	4307073	4309033	110.862	74.849	76.5118	71.9928	62.2016	116.176	120.751	91.4111	102.699	71.6659	175.066	72.2308	58.8802	117.116	66.2354	83.614	103.625	70.4789	73.7802	106.684	100.55
GRMZM5G847669	chr4	2310651	2311266	0	0	0	0	13.7425	0	0	3.36171	0	0	0	0	0	0	0	0	0	135.252	0	0	0
GRMZM2G000261	chr10	128558612	128560075	28.9811	56.1025	37.0844	25.487	29.0876	20.8844	27.4428	22.8511	31.2653	32.6609	20.0373	19.1741	34.1795	41.1693	26.097	21.5397	23.4606	28.5097	26.9464	17.3232	33.8062
GRMZM2G035574	chr7	27027367	27033202	26.5942	21.4477	26.1433	17.8084	23.1594	21.6583	12.7492	28.6046	25.1365	22.5446	23.5845	27.8351	10.4428	19.7991	13.285	14.9461	19.4071	12.838	16.1698	26.9342	22.4282
GRMZM2G463493	chr8	17058191	17062569	35.6895	38.6434	49.7857	28.7018	21.6501	33.8325	29.8436	44.6873	39.4425	25.7761	25.6775	26.4494	27.5449	29.7048	37.6723	56.6676	21.6429	33.9877	34.8074	34.4793	55.5781
GRMZM5G864903	chr3	64279519	64281461	0	0	0	3.57432	0	9.79259	0	6.81792	0	0	0	0	0	0	3.87015	0	0	0	0	0	0
GRMZM2G098203	chr8	135068216	135071207	0	0	0	0	0	0	0	0	0	0	0	0	0	0	8.80029	20.1855	0	0	0	0	0
GRMZM2G099319	chr1	179587259	179591121	114.579	105.73	127.368	90.0804	167.029	93.7391	121.523	106	166.627	105.606	123.569	77.9154	95.4921	97.3538	149.112	104.944	80.3009	153.971	105.127	73.9014	104.509
GRMZM2G056373	chr1	49620251	49621863	142.433	135.683	169.808	209.434	228.228	289.844	179.721	164.5	145.939	158.93	173.083	98.1055	242.889	181.16	315.717	125.245	297.334	164.99	145.794	238.171	216.074
GRMZM2G700182	chr10	30168275	30168573	0	0	0	0	0	0	0	0	0	0	0	0	0	0	0	0	0	0	0	0	0
GRMZM2G039011	chr10	149029518	149031458	54.0053	52.5406	52.6018	48.573	44.0504	46.4635	61.9238	43.3551	43.3392	51.6158	72.1348	47.8498	38.9835	48.7421	47.3112	48.904	45.5591	56.9233	54.9265	44.9288	40.051
GRMZM2G067707	chr9	14782704	14785132	1185.66	1063.93	1000.96	875.069	1019.96	784.846	991.366	962.066	926.561	1190.54	1012.74	898.397	949.308	898.655	763.03	621.78	941.704	861.893	808.9	860.322	833.595
GRMZM2G160408	chr2	102023514	102024342	0	0	0	0	0	0	0	0	0	0	0	0	0	0	0	0	0	0	0	0	0
GRMZM2G111713	chr7	170422171	170436873	77.8675	46.6812	56.1979	56.5569	47.8826	59.8603	49.2609	70.3278	54.6514	63.2042	63.9345	65.3669	74.2806	48.3618	45.756	61.0952	72.6105	36.4928	43.8242	63.3909	54.0586
GRMZM2G043396	chr8	170061869	170062790	23.9099	20.3339	18.1863	19.063	9.78208	25.5884	27.9234	12.1825	11.5786	23.918	17.2899	13.9313	17.1908	12.6284	13.0963	19.2588	12.1616	11.7569	24.2073	22.5398	18.9498
GRMZM5G839762	chr5	151720301	151722142	0	0	0	4.16189	0	0	0	3.10909	3.80407	0	0	0	0	3.86959	0.328136	3.24356	0	4.06792	0	0	0
GRMZM5G846405	chr5	151973729	151975219	1.74422	19.1887	12.6219	12.0028	13.5121	0.145064	0	34.515	12.2607	11.2897	10.7307	2.67745	0.319154	0	25.4636	23.6066	17.6003	4.5502	13.3817	6.32537	34.7628
GRMZM2G701645	chr3	92019216	92019525	0	0	0	0	0	0	0	0	0	0	0	0	0	0	0	0	0	0	0	0	0
GRMZM2G047272	chr2	119292713	119295641	0	0	0	0	4.6168	0	0	0	0	0	0	0	0	0	0	0	0	0	0	0	0
GRMZM2G110116	chr9	154640751	154643385	205.101	170.303	186.357	197.468	144.488	170.718	134.678	194.918	166.706	186.843	185.237	173.29	187.328	186.608	157.844	144.112	154.3	156.177	126.781	193.323	189.467
GRMZM2G701429	chr3	36687761	36688273	0	0	0	0	0	0	0	0	0	0	0	0	0	0	0	0	0	0	0	0	0
GRMZM2G077106	chr7	136825235	136826569	5.41657	0	0	0	0	0	0	0	0	0	0	0	0	0	0	4.67858	0	0	0	0	0
GRMZM2G380377	chr6	62553729	62555335	0	0	0	0	0	0	0	0	0	5.72984	0	0	0	0	0	0	0	0	0	0	0
GRMZM2G384128	chr3	18014708	18015875	0	0	0	0	0	0	0	0	0	0	0	0	0	0	0	0	0	0	0	0	0
GRMZM2G178571	chr1	9911960	9922566	80.1419	66.5808	49.0363	43.0615	79.2897	63.3839	74.004	55.7833	63.4384	62.0814	70.063	61.3191	47.5388	70.1875	73.0028	53.7485	70.7075	46.6283	55.1214	59.8502	56.2323
GRMZM2G135362	chr8	169901370	169904006	22.4316	55.3054	33.7902	30.1381	64.4642	43.6978	58.8748	47.7049	43.7255	48.3166	35.4379	42.9421	19.3208	45.2682	24.6629	37.1061	51.4574	34.9828	28.5927	38.2736	30.4134
GRMZM2G588344	chr2	136840044	136840946	0	0	0	0	0	0	0	0	0	0	0	0	0	0	0	0	0	0	0	0	0
GRMZM5G834697	chr9	11928113	11929852	70.9157	82.8996	81.7754	68.5294	65.6006	84.1537	81.6453	64.3582	66.9167	68.9893	76.8681	63.0668	56.5515	75.5085	54.0314	68.9684	62.2726	80.6727	75.2314	61.579	55.3167
GRMZM2G161768	chr8	154852774	154856273	0	0	0	0	0	0	0	0	0.110413	0	0	0	0	2.06582	0.0422457	0	0	0	0	0	0
GRMZM2G080295	chr2	195649881	195651315	4.8799	0	5.68868	4.00617	7.60946	0	0	2.50408	0	6.36633	5.97228	0	0	4.40793	5.39996	0	4.38843	0	0	0	4.13658
GRMZM5G865769	chr3	157204567	157208000	82.9933	69.7527	58.6098	65.5675	75.1493	78.4091	69.0106	72.6692	59.405	75.5742	73.3336	73.9678	70.905	64.2393	66.5597	72.3423	72.4393	59.6764	34.1376	76.5882	89.959
GRMZM2G539054	chr10	65268210	65268794	0	0	16.6812	0	0	0	18.074	28.1843	0	0	0	0	0	0	16.2227	13.9673	0	20.7629	0	52.8515	22.688
GRMZM2G416708	chr3	41294528	41296065	0	0	0	0	0	0	0	0	0	0	0	0	0	0	0	0	0	0	0	0	0
GRMZM5G843781	chr1	41725058	41726236	15.6164	3.45574	5.96819	3.26522	5.49152	3.48009	0	10.6562	2.6905	4.23212	3.53118	12.2931	0	5.91588	4.62267	11.1447	3.96868	0	13.8783	5.56277	6.77409
GRMZM5G872254	chr1	274483892	274485432	8.30112	14.7444	8.61991	6.99674	7.48381	9.13247	11.4359	14.4086	8.91709	8.11346	0	0	13.3707	0	10.791	0	0	12.5639	0	14.0204	0
GRMZM2G425427	chr10	85319449	85321023	0	0	0	0	0	0	0	0	0	0	0	0	0	0	0	0	0	0	0	0	0
GRMZM2G377887	chr5	65948914	65954242	84.3638	86.8117	62.5438	88.1467	65.3869	72.6955	86.2288	90.2254	87.6761	78.3244	97.4518	99.3746	67.3696	85.4063	83.2764	103.384	71.1521	87.481	82.974	92.9014	101.578
GRMZM2G320305	chr10	2690433	2694516	28.5726	26.4111	13.1863	20.0363	30.0015	25.3931	31.3665	26.4275	30.1504	19.4808	30.7739	13.9992	30.1661	21.9299	26.4645	21.5007	27.0757	11.9908	35.1685	29.7572	24.6911
GRMZM5G828945	chr4	32755674	32762217	0	0.551371	0.938622	0.907849	0.805329	40.93	4.86711	1.0248	18.1869	1.19842	0.821369	0	11.3402	11.3636	11.0973	0	7.48489	0.990442	0.937285	2.21703	1.63192
GRMZM2G366373	chr1	253302198	253303545	83.9552	187.813	180.365	118.909	69.976	82.5604	77.9591	151.507	77.9997	102.739	59.3624	88.3648	68.3123	100.763	104.691	124.813	61.3783	90.6852	137.631	85.6419	171.104
GRMZM2G107715	chr5	96584652	96586186	0	2.92221	2.09309	2.85164	0	2.58876	0	0	2.29806	0	0	0	0	3.74071	0.790685	0	0	0	0	0	11.0315
GRMZM2G041642	chr2	229132328	229144149	25.2641	25.245	24.5886	29.4654	5.3424	20.3583	22.886	18.0174	26.2459	33.5524	0	12.3015	18.3742	31.6521	22.0935	22.8707	14.1375	15.3273	24.8565	21.8303	31.8459
GRMZM2G117012	chr5	69434885	69436114	40.1032	52.3096	50.756	63.9217	53.3065	51.5581	65.0777	66.3688	68.2042	50.8917	25.9684	62.0466	52.2374	80.5803	70.8963	82.485	54.5472	72.6383	35.2537	56.3485	45.499
GRMZM5G814164	chr7	85874276	85881002	48.5055	87.1363	68.4318	82.8383	29.7647	49.9112	67.7947	84.2408	33.1895	72.0936	89.1165	56.0781	25.5278	56.0274	83.108	49.4285	75.7988	84.3104	79.4303	85.5194	102.112
GRMZM2G164136	chr9	140123390	140127499	61.2947	71.0484	60.9461	51.6162	61.1263	51.2015	23.999	76.4014	87.2934	35.609	34.5201	41.1434	53.981	76.7982	89.928	63.3978	48.4175	30.7736	57.8821	45.4834	80.3455
GRMZM2G090929	chr3	218781796	218782249	156.701	123.977	99.1776	99.3933	57.4752	104.193	160.837	114.959	71.0766	82.7664	105.582	81.3256	61.1333	86.0781	107.127	90.602	113.868	94.0075	94.8028	118.754	54.6052
GRMZM5G868324	chr1	152400589	152404307	0	0	0	0	0	0	0	0	0	0	0	0	0	0	3.58	0	0	0.0734181	0	0	0
GRMZM2G035843	chr4	204664488	204668662	75.692	66.6152	61.9283	65.9032	60.7392	60.5462	60.3085	69.4017	70.6543	55.2581	62.9317	77.99	60.0926	61.5836	52.521	64.145	46.5282	72.079	57.1326	76.8984	69.6991
GRMZM2G051683	chr3	205694155	205695856	68.2884	67.6945	77.4874	49.9056	68.689	57.6107	65.1769	49.3992	70.7583	73.0962	52.4355	38.6333	61.0759	27.5	63.7148	130.635	40.7356	66.4336	87.2947	33.826	48.137
GRMZM2G168933	chr8	20231215	20232926	0	0	0	0	0	0	0	0	0	0	0	0	0	0	0	0	0	0	0	0	0
GRMZM2G073272	chr5	159232313	159233530	0	0	0	0	0	0	0	0	0	0	0	0	0	0	0	0	0	0	0	0	0
GRMZM2G395695	chr9	88560302	88560834	0	0	0	0	0	0	0	0	0	0	0	0	0	0	0	0	0	0	0	0	0
GRMZM2G002851	chr2	198024251	198030336	78.7015	95.1565	75.9194	96.8884	67.339	87.7252	111.047	112.916	102.75	79.376	100.053	90.7872	114.965	104.948	89.3772	82.8146	86.314	70.4828	73.1314	116.344	114.794
GRMZM2G134552	chr5	211299996	211302190	18.3522	19.4237	17.1859	18.0626	0	23.514	13.2561	15.1516	14.5513	12.1128	2.52942	8.76309	0	8.10532	14.2158	15.6591	8.83026	4.92982	10.2663	6.03041	12.424
AC225345.3_FG009	chr1	49797005	49797959	0	0	0	0	0	0	0	0	0	0	0	0	0	0	0	0	0	0	0	0	0
GRMZM5G822180	chr5	14608561	14609662	103.965	201.604	220.05	170.15	193.906	261.171	158.688	145.644	194.452	150.575	145.635	155.224	207.88	174.929	201.91	176.029	172.195	190.729	257.849	128.071	215.505
GRMZM5G895680	chr2	148841388	148841914	0	0	0	0	0	0	0	0	0	0	0	0	0	0	1.35715	0	0	0	0	0	0
GRMZM2G066820	chr2	23667516	23671685	70.6718	92.6741	85.0259	50.5494	52.0877	80.7478	56.6466	72.5369	59.631	68.2197	65.3882	76.0947	62.4717	52.2089	40.8354	46.2466	82.1185	81.7859	84.3911	74.5397	78.1078
GRMZM5G895435	chr6	94713648	94717995	87.6832	80.7962	56.8343	53.3658	55.7007	86.0456	51.5041	56.6428	73.3838	81.3829	84.7896	47.334	49.8379	67.2227	71.1366	53.2921	82.7892	78.9769	92.7545	57.0143	65.4175
GRMZM2G119230	chr8	17370947	17371391	157.915	117.856	141.097	125.161	65.9271	114.253	91.0062	110.436	93.0763	97.0517	95.384	132.706	100.446	102.992	86.6318	106.984	81.8678	87.4259	72.599	131.089	156.768
GRMZM2G065205	chr1	147082259	147087160	77.3007	59.5316	90.6397	103.901	73.9178	85.6266	50.0526	90.8485	63.4048	64.9542	72.9306	77.3506	86.0919	85.4962	78.4295	60.3852	77.2978	57.8604	54.9346	69.8021	57.4657
GRMZM2G361120	chr3	173284945	173288635	7.66798	15.3171	3.57738	3.44529	4.0341	4.94863	5.10175	2.67363	4.26979	4.49774	3.62348	4.91923	1.82663	2.14517	4.46114	2.47572	20.3494	1.2288	2.82201	7.86586	3.2518
GRMZM2G445905	chr1	234254282	234264784	415.806	440.633	470.04	445.452	431.386	443.694	339.24	411.234	425.68	422.572	342.282	455.886	449.73	368.174	351.575	362.687	389.341	366.6	373.954	368.157	396.526
GRMZM5G813804	chr10	77555842	77556382	41.5168	42.5501	28.5239	31.231	42.0252	22.8006	54.6559	48.1736	29.508	46.8468	25.612	50.9508	0	39.9652	17.0454	40.9781	45.0973	32.8332	20.8699	60.8416	66.8562
AC205066.3_FG008	chr2	200773482	200773998	0	0	0	0	0	0	0	0	0	0	0	0	0	0	1.39749	0	0	0	0	0	0
GRMZM5G834759	chr2	8134568	8135450	0	0.479683	0	0.252609	0	0	0	0	0	0	0	0	0	0	0	0	1.84009	0	0	0	2.83498
GRMZM2G042218	chr8	166580074	166581471	0	0	0	0	0	0	0	0	0	0	0	0	0	0	0	0	0	0	0	0	0
GRMZM2G153445	chr2	188104603	188105175	0	0	64.0366	0	0	0	0	3.47165	0	0	0	0	0	0	4.79063	0	0	0	0.115875	0	0
GRMZM2G034283	chr1	15068244	15069580	0	0	0	0	0	0	0	0	0	0	0	0	0	0	0	0	0	0	0	0	2.57757
GRMZM2G518751	chr9	100951089	100957836	0	0	0	0	0	5.05465	40.3571	46.5045	0	12.2071	0	0	0	0	39.9838	0	0	0	0	0	0
GRMZM2G117401	chr8	44383681	44410624	153.02	180.025	155.509	171.613	144.352	166.151	154.457	169.432	169.45	173.765	154.589	156.236	142.793	192.738	148.202	157.341	129.614	122.256	155.056	160.118	166.606
GRMZM2G043503	chr1	145048860	145051254	9.29777	5.90461	3.66719	3.1925	1.96453	5.32672	10.4015	4.89579	7.4083	5.38317	5.02467	5.84493	0	7.59021	2.01798	6.2687	3.3048	3.65827	6.50473	11.6123	5.32033
GRMZM2G005052	chr6	163501134	163502746	5.89699	14.9331	7.31975	6.98756	0	11.5125	0	7.99534	7.82569	12.8099	7.75374	11.1714	0	7.02316	7.98719	12.9654	7.33696	0	16.1554	0	9.44045
GRMZM5G846185	chr1	65097662	65100413	0	0.681249	3.38722	1.61606	0	0	0	0.522719	1.09922	0	0.37206	0	0	1.93446	3.14865	0.703296	0	2.63319	0	2.21106	0
AC183950.2_FG004	chr8	163214352	163217092	0	4.85566	2.26935	2.83337	0	2.39768	0	2.99714	3.139	0	5.99782	0	0	0	1.63376	0	0	0	0	0	2.43015
GRMZM5G851734	chr1	15102342	15103778	0	0	0	0	0	0	0	0	0	0	0	0	0	0	0	0	0	0	0	0	0
GRMZM2G583274	chr8	116488116	116488810	0	0	0	0	0	0	0	0	0	0	0	0	0	0	0	0	45.8644	0	0	0	0
GRMZM2G702140	chr3	200605737	200605890	0	0	0	0	0	0	0	0	0	0	0	0	0	0	0	0	0	0	0	0	0
GRMZM2G169240	chr10	19069354	19071252	68.6379	61.3514	96.1879	177.787	284.923	106.057	96.9445	76.4365	18.5959	170.575	91.3203	217.413	166.036	72.5164	203.247	136.144	258.417	359.011	175.839	52.6258	167.274
GRMZM2G009083	chr2	178880959	178881997	0	0	0	0	0	0	0	0	0	0	0	0	0	0	0	0	0	0	0	0	0
GRMZM2G101130	chr1	220822713	220824028	149.12	99.2614	103.689	89.4783	38.8034	121.269	46.5962	115.74	70.8898	71.4161	56.074	58.4718	77.2368	50.3438	58.1331	81.1406	60.8292	73.726	165.268	100.698	138.343
GRMZM2G077233	chr8	607068	620653	227.682	221.834	264.417	492.614	382.445	322.195	339.553	302.762	387.209	371.85	363.337	263.057	442.76	448.283	270.032	282.706	271.184	341.552	308.093	450.75	336.171
GRMZM2G030809	chr7	27764412	27766620	56.3025	107.747	71.0747	117.216	133.842	154.59	78.4697	216.796	85.0515	186.242	119.118	67.6321	122.149	97.5731	109.245	107.316	137.617	119.337	148.144	114.597	245.773
GRMZM2G463462	chr6	55595392	55601156	63.0664	96.5015	119.158	80.1272	92.1176	111.057	76.6033	143.466	68.9921	66.9003	128.656	75.8964	70.2584	64.5786	92.1581	95.22	73.6341	91.8003	94.2769	94.6202	100.09
GRMZM2G001639	chr7	141594343	141596875	266.505	310.792	226.085	213.912	182.599	175.045	205.15	275.437	189.797	236.76	234.734	177.183	163.116	255.587	194.973	108.767	232.665	358.314	170.538	239.801	355.608
GRMZM2G121452	chr3	6303447	6311791	199.597	172.229	260.949	192.879	177.143	232.345	155.369	160.386	168.352	269.849	149.156	138.905	179.982	259.451	170.841	186.1	159.202	240.54	187.975	233.072	183.797
GRMZM2G110616	chr1	7568486	7570697	7.63577	44.7341	27.2378	19.1016	35.9727	37.4993	6.35386	13.5574	7.6616	4.84902	3.96754	5.71804	4.17026	34.4024	7.58125	18.8538	1.09028	34.3511	38.1013	6.15627	25.3825
AC214040.3_FG009	chr1	36155685	36157670	0	0	0	2.56447	0	0	0	2.74316	0	0	0	0	0	0	0	0	0	0	3.09681	0	0
GRMZM2G417092	chr2	228743815	228744524	0	0	0	0	0	0	0	0	0	0	0	0	0	0	0	0	0	0	0	0	0
GRMZM2G084279	chr5	162834760	162837541	776.205	1192.85	1988.27	889.174	1866.69	2255.62	2996.28	1346.15	1215.25	3889.6	1336.12	929.125	1652.95	2839.07	1215.57	1155.81	1556.98	946.023	2235.85	1070.08	2426.48
GRMZM2G347541	chr4	184547631	184552118	105.635	100.477	97.3742	113.523	94.088	115.029	134.919	87.8968	107.338	132.239	81.9905	69.5605	103.158	83.0647	86.8794	96.4095	97.6415	95.8428	78.2415	126.963	93.3506
GRMZM2G022258	chr5	741454	752529	103.348	101.714	95.8366	129.145	82.2332	118.566	108.856	119.336	115.741	98.9059	109.427	101.024	115.477	110.041	105.529	114.847	99.8978	92.7114	81.6717	109.142	112.407
GRMZM2G103914	chr8	36294258	36295743	8.44904	15.9341	8.18401	3.92978	0	0	0	5.30552	0	0	15.9946	0	0	0	4.48037	13.0166	11.3917	15.5112	7.38165	19.6247	18.7793
GRMZM2G034197	chr8	144457777	144461277	9.11818	12.3321	12.8699	10.6814	5.42994	10.9437	18.851	13.4089	14.8964	10.3967	14.7944	13.4565	12.4326	14.3463	12.2866	13.5948	13.1348	11.7737	17.9088	8.73624	11.8129
GRMZM2G066716	chr9	135388461	135389097	0	0	0	0	0	0	0	0	0	0	0	0	0	0	0	0	0	0	0	0	0
GRMZM2G139431	chr4	45483358	45484041	0	0	0	0	0	0	0	0	0	0	0	0	0	0	0	0	0	0	0	0	0
GRMZM2G169773	chr3	191054590	191060929	102.146	128.217	111.931	107.53	89.1769	105.002	90.6893	142.442	103.74	125.906	110.596	105.404	96.0347	115.943	105.87	100.466	120.938	111.562	110.951	108.34	135.456
GRMZM2G032865	chr6	148111306	148113319	0	9.79216	15.6289	10.1847	9.15524	7.09613	11.6516	9.5627	5.47922	10.1769	10.005	0	0	5.10221	8.45153	4.78496	9.65484	0	5.74384	14.6461	6.65852
GRMZM2G341166	chr8	166556513	166558456	2.32438	4.77659	3.98486	1.4339	1.88901	10.6275	3.6886	2.22761	15.1001	3.8269	1.72686	2.48143	7.48951	3.06632	9.50864	1.77573	4.00964	0.213678	2.28298	3.36164	4.83263
AC194341.4_FG004	chr8	141377174	141378917	7.13102	17.9285	17.7458	11.4365	21.7032	6.31148	8.26997	10.101	14.7262	0	10.3089	0	14.4679	13.4054	11.8591	11.3437	6.08785	8.67786	10.5971	0	13.6896
GRMZM2G006399	chr7	29171520	29172716	0	15.7586	9.84288	6.82853	18.6702	10.1704	19.7984	6.50084	7.15295	0	18.8995	0	0	18.2872	13.9205	9.72841	12.624	7.37928	15.5565	26.2361	8.10579
GRMZM2G326869	chr1	25104485	25108224	0	0	0	0	0	0.120327	0	0	0	0	0	0	0	0	2.22821	0	0	0	0	0	0
GRMZM2G160327	chr5	158822233	158824128	73.4432	97.5276	73.6303	92.8156	24.9826	8.04835	55.3457	79.6085	103.977	68.644	44.4568	65.1262	43.4002	13.815	14.4495	61.1194	52.6484	29.8711	68.3903	48.4981	36.3751
GRMZM5G897738	chr10	119519804	119520975	1.23545	0.589849	0.712955	0	0	1.3045	0	0	0	0	0	0	0	0	1.59662	1.54159	0	1.83924	0	0	0
GRMZM2G072105	chr4	59187682	59188724	0	0	0	0	0	0	0	0	0	0	0	0	0	0	0	0	0	0	0	0	0
AC185217.3_FG004	chr4	190256504	190257669	0	0	0	0	0	0	0	0	0	0	0	0	0	0	0	0	0	0	0	0	0
GRMZM2G042179	chr4	174777311	174780409	65.639	53.4942	60.7263	61.1959	60.7659	48.6755	60.5472	69.4048	63.2225	66.8052	68.755	42.3174	44.0527	65.2714	37.1476	52.355	55.8267	54.6638	67.5486	57.9953	75.5523
GRMZM2G333775	chr3	222582854	222584403	6.35722	10.385	11.976	16.3864	12.7235	24.5531	9.15024	18.3679	11.7709	18.1749	15.0548	29.4257	0	12.1574	10.6911	28.1671	15.8405	18.7961	17.0291	17.4413	12.3263
GRMZM2G544775	chr9	6707820	6708608	17.8565	0	0	0	0	0	0	0	0	0	0	0	0	0	4.41452	0	0	0	0	0	0
GRMZM2G042867	chr10	142725778	142727140	10.3478	3.56646	3.96413	4.11652	0	3.82635	7.11194	5.37032	3.31889	0	4.67622	7.60397	0	2.72364	5.65273	4.64237	6.11787	0	5.06787	0	3.45807
GRMZM2G419157	chr8	143010211	143014942	0	0	0	0	0	0	0	0	0	0	0	0	0	0	0	0	0	0	0	0	0
GRMZM2G034876	chr5	200291797	200295328	7.48604	7.89892	10.5107	14.0187	7.35566	11.8294	10.735	8.62603	11.571	11.171	14.8728	10.7812	11.5091	11.8935	17.3545	10.4978	11.8592	3.94202	14.2262	7.45326	4.94494
AC213400.4_FG003	chr5	100390130	100390571	0	0	0	0	0	0	0	0	0	0	0	0	0	0	0	0	0	0	0	0	0
GRMZM2G116258	chr6	155589494	155593823	892.035	1103.73	867.464	1105.62	836.198	1225.34	1682.6	1235.1	1033.17	937.791	1186.22	733.378	1108.65	1173.77	1054.83	846.714	1020.36	687.846	857.447	1012.57	1150.24
GRMZM2G470981	chr3	32783181	32791380	33.439	45.0642	14.6812	36.459	14.5016	21.5995	43.8306	95.9619	37.9356	25.9748	36.5079	27.8357	56.0278	87.3496	28.0603	18.4781	64.7072	37.5168	51.9616	25.6248	54.608
GRMZM2G373554	chr2	176916644	176917590	43.4838	10.6248	14.6715	17.3987	14.0971	19.921	11.979	21.9145	6.14684	26.6087	17.5579	17.2727	0	10.135	7.55053	27.694	18.9172	28.4904	23.9866	13.0847	18.391
GRMZM2G110063	chr8	14727820	14778423	526.395	502.421	375.594	328.272	391.561	431.823	604.977	342.888	330.613	376.959	489.67	321.96	377.161	423.438	520.819	347.521	497.996	304.966	411.407	475.031	444.409
GRMZM5G815477	chr3	86541461	86541862	0	0	0	0	0	0	0	0	0	0	0	0	0	0	0	0	0	0	0	0	0
GRMZM2G148924	chr10	84092832	84097287	41.6963	53.9069	44.5819	45.5489	52.6098	53.5294	43.2098	59.9629	54.0819	43.3335	37.9195	32.6813	49.6868	46.9866	49.9513	45.8516	56.9582	37.4067	44.9424	48.6899	60.5216
GRMZM2G342744	chr2	117502443	117502659	0	0	0	0	0	0	0	0	0	0	0	0	0	0	0	0	0	0	0	0	0
GRMZM2G130927	chr5	12032677	12038315	20.2009	20.523	23.8811	27.3953	21.093	22.4793	16.2697	16.6166	22.0532	22.1521	31.0228	23.1308	19.7698	24.3876	24.0223	17.6115	20.6414	23.7739	21.9557	19.6447	26
GRMZM2G138258	chr3	147397872	147401506	3069.19	3503.32	3263.19	2954.25	3016.11	3828.31	4166.92	2850.66	3392.76	2485.68	3533.77	1379.95	3182.04	3242.42	3604.1	2826.25	3175.86	2453.55	4133.97	2199.39	1890.44
GRMZM2G301893	chr3	104067120	104067713	0	0	0	0	0	0	0	0	0	0	0	0	0	0	0	0	0	0	0	0	0.185887
GRMZM2G160136	chr3	47231108	47233939	7.2345	11.6551	4.48836	7.70788	10.2371	5.81417	11.4659	7.9626	7.6081	16.0928	23.2267	25.9816	12.869	4.76902	13.9596	11.8507	9.42742	13.4936	7.1258	9.63379	14.7439
GRMZM2G381933	chr8	4844558	4853049	207.532	160.472	169.178	159.049	113.166	175.314	205.61	170.359	129.478	178.308	181.68	222.055	171.807	165.594	121.971	162.216	122.665	141.577	131.296	120.78	174.91
GRMZM2G175543	chr6	88747512	88749211	45.6014	33.7197	40.9355	44.5528	37.946	32.6432	58.2403	41.3434	33.2702	45.1634	46.267	49.9688	32.9333	35.7374	32.1731	43.3583	39.2895	30.2495	41.4598	47.368	31.8318
GRMZM2G143357	chr4	96806899	96809179	104.563	31.339	88.1083	115.376	135.976	120.404	109.148	99.5408	140.071	86.7582	86.3639	87.7677	121.339	111.778	136.557	95.7512	84.7369	95.4824	123.52	96.0186	97.6893
GRMZM2G008166	chr6	111707645	111711131	5.72376	12.8955	7.30534	9.28598	14.8847	0	0	0	13.4395	0	0	0	0	4.33012	14.3537	10.1801	0	0	9.9462	0	8.155
GRMZM2G032537	chr6	72810647	72815513	0	0.39175	0.811689	0.719599	1.88154	1.56232	2.68179	1.66092	1.38451	1.59482	0	0	0	1.07	1.76004	1.16344	0	0	0.550907	3.31901	0.758739
GRMZM2G121790	chr4	228661697	228666923	237.503	267.641	223.129	234.87	194.933	227.642	261.295	245.909	228.498	215.395	260.259	288.996	205.273	253.953	191.205	240.135	234.931	214.709	227.891	221.453	233.328
GRMZM2G163067	chr2	14266570	14267838	102.115	46.2013	76.4775	28.7366	24.71	66.4134	59.8698	36.5787	38.4548	121.225	82.4259	55.9509	46.0668	36.8656	74.6936	16.7165	28.0835	32.1948	35.8705	107.594	41.7417
GRMZM2G005633	chr10	127370238	127371829	18.4595	19.9553	95.238	38.3045	130.757	10.615	75.5964	110.876	40.0174	105.586	77.7802	132.074	332.019	44.2351	53.6996	81.4698	59.6607	96.2454	33.9773	60.0355	30.4756
GRMZM2G479760	chr5	210049696	210051412	14.2592	13.5181	13.6026	16.5935	61.1482	16.809	30.7945	17.2799	34.082	36.6656	25.133	14.5468	16.4054	17.5565	74.6974	24.1327	19.4637	22.3897	27.0372	17.0396	30.4614
AC194032.3_FG010	chr9	151696413	151699380	0	0	0	0	44.7275	0	0	0	19.1545	0	0	0	37.7126	0	0	0	0	0	0	0	0
AC203928.4_FG001	chr9	91717165	91717504	0	0	0	0	0	0	0	0	0	0	0	0	0	0	0	0	0	0	0	0	0
GRMZM2G031545	chr7	165383928	165386707	2626.53	2528.06	2641.84	2457.28	2211.98	2479.1	2078.37	2936.39	2591.77	2399.59	2823.16	2431.47	2888.75	3177.72	2615.56	3027.85	2438.23	2669.79	2527.24	2227.99	2657.74
GRMZM2G325683	chr5	176870666	176871296	0	10.1244	11.5237	13.9624	101.31	0	0	91.5301	0	0	22.5082	0	48.2338	10.5501	9.54265	25.0109	14.8631	0	17.2127	0	8.78758
GRMZM2G111998	chr8	32962723	32965743	67.1242	229.453	121.29	123.522	98.0607	145.298	147.052	175.283	116.902	101.218	42.9743	75.6705	162.828	172.146	146.325	91.1994	113.75	182.958	63.0993	101.918	173.599
GRMZM2G152373	chr9	26548871	26550670	12.4133	7.31935	13.7604	12.5068	7.38937	5.73713	5.35723	12.0442	16.0545	14.6563	6.79206	13.8063	6.14269	6.8207	9.27188	9.8993	14.8507	0	11.8883	4.67008	14.0507
GRMZM2G048276	chr1	210219078	210224111	45.0238	54.6453	58.6081	59.4927	42.2753	53.3948	51.0903	57.5256	56.0476	45.8796	46.5244	63.2527	56.2743	63.7068	48.5084	52.6069	34.4955	44.2201	45.7429	49.124	47.8613
GRMZM2G700721	chr8	155483465	155483720	0	0	0	0	0	0	0	0	0	0	0	0	0	0	0	0	0	0	0	0	0
GRMZM2G355381	chr3	9112148	9120357	8.49122	10.9983	9.60867	9.60027	8.35873	15.4752	12.2306	18.8887	11.0578	12.4404	10.3246	15.7706	5.9582	13.4712	14.3943	7.8323	16.0099	10.8427	13.8464	14.2328	13.8641
GRMZM2G091621	chr9	145176643	145178560	6.20221	3.9716	4.39047	0	0	0	0	1.67707	0	3.44516	0	0	0	8.39182	3.35349	0	0	0	0	0	4.63196
AC207656.3_FG002	chr5	49253259	49255662	49.7095	46.1373	46.5951	48.9825	43.3571	51.2668	48.4939	43.8821	49.7609	51.6672	60.0765	36.2362	42.6649	50.6665	38.1872	53.6607	49.9671	41.5037	56.2736	38.1195	48.1228
GRMZM2G101711	chr7	134007494	134013644	89.5286	92.4122	76.7235	81.7721	71.4316	96.7973	78.6875	82.8111	77.9616	58.7115	74.1735	99.8173	68.5557	90.2896	86.6875	91.3098	64.0857	52.7848	74.6979	73.8977	60.1427
GRMZM2G117436	chr6	138466923	138468214	0	0	0	0	0	0	0	0	0	0	0	0	0	0	0	0	0	0	0	0	0.588348
GRMZM2G320360	chr3	174901754	174908151	0	0	0	0	0	0	0	0	0	0	0	0	0	0	0	0	0	0	0	0	0
GRMZM2G089720	chr1	50420160	50421666	0	0	5.58951	3.78042	13.6491	0	0	3.73119	0	0	0	0	0	0	0	0	0	0	0	0	1.48745
GRMZM2G058336	chr9	89198116	89199404	11.2826	7.74822	12.3082	10.9349	8.91184	8.84616	11.9378	9.20355	12.1292	12.6779	12.1279	8.89257	11.3836	11.9036	9.28221	8.91953	13.1297	10.7719	6.70902	11.4989	10.9643
GRMZM2G018775	chr2	171729719	171737205	120.971	128.552	121.137	126.846	128.944	128.678	118.044	133.942	106.121	132.694	118.305	116.092	120.649	154.316	109.684	133.835	118.746	137.094	128.844	103.2	144.494
GRMZM2G143210	chr1	90839053	90843952	2.55219	1.45661	1.30864	10.2593	25.6869	24.2083	10.0978	2.01798	15.5486	6.04561	11.7026	35.9657	13.8675	2.98114	14.7231	1.80568	3.30187	5.69401	4.93426	11.0822	7.75309
GRMZM2G045735	chr8	96762225	96762719	0	0	0	0	0	0	0	0	0	0	0	0	0	0	0	0	0	0	0	0	0
GRMZM2G016240	chr3	174890579	174893937	2.36184	0	0	0	0	0	0	0.940189	1.31179	0	2.21845	0	0	0	0	0	1.5592	0	0	0	5.8633
GRMZM2G348480	chr4	197722305	197728659	1.41576	0.200786	0.439223	0.495963	0.132243	0.803523	0.531204	1.35789	0.642427	0.921303	3.84817	0	0	0.688008	1.15466	0.302569	2.15622	0.571453	1.39792	2.20637	1.99884
GRMZM5G837364	chr5	23488626	23494955	141.767	105.534	123.01	96.6671	129.81	133.757	85.4518	148.396	122.528	113.878	106.508	114.619	128.275	163.231	115.914	98.9617	99.0505	110.7	85.6936	113.85	88.1875
GRMZM2G062587	chr3	143858947	143862131	0	0	0	0	0	0	0	0	0	0	0	0	0	0	0	0	0	0	0	0	0
GRMZM2G301355	chr2	127824055	127827013	5.89175	10.1553	15.8774	8.22123	10.5762	13.4528	13.6699	8.08705	13.108	16.7105	5.18413	12.7747	11.7116	14.6098	4.86556	6.12295	8.78134	11.2208	7.65109	7.19772	16.3751
GRMZM2G051921	chr2	33507059	33508210	9.75873	9.09883	17.1469	26.744	35.1845	0	0	18.9889	4.75594	31.2102	47.9275	11.3801	40.2823	46.6104	7.13292	43.3054	25.2492	15.3046	7.75154	7.01088	6.65628
GRMZM2G148810	chr6	124705684	124710238	85.4064	48.7005	69.076	55.2776	68.0564	74.9427	67.9113	57.8893	72.8891	102.359	69.0661	75.5821	72.4225	47.1975	77.896	64.4681	74.1912	47.6427	66.7714	85.2754	70.3523
GRMZM2G022269	chr1	298408223	298413579	429.342	387.214	335.812	357.634	286.114	321.455	325.775	400.884	349.024	363.372	366.489	403.406	333.48	314.682	311.525	338.747	374.105	246.661	258.806	410.075	340.616
GRMZM2G139617	chr3	158348058	158355046	193.119	176.748	196.402	189.296	128.936	195.761	173.354	177.427	165.797	170.108	209.176	148.41	114.772	199.884	141.743	167.313	155.865	135.613	173.518	201.368	194.198
GRMZM2G136662	chr6	8110099	8134159	29.542	21.1876	20.5731	21.7535	23.377	23.3078	29.7702	21.2329	23.9329	29.1266	24.8509	22.2276	20.2442	28.2436	24.8538	20.1371	19.7458	26.6239	22.1031	33.6248	20.5655
GRMZM2G010640	chr7	150019754	150021283	35.5103	23.2471	31.8579	17.9518	8.77382	22.7342	14.2877	16.2614	14.0746	16.341	15.4565	17.0012	9.23821	14.2916	14.5953	19.3491	0	11.1088	20.8004	14.0021	29.989
GRMZM2G477205	chr4	216318360	216322227	53.2421	48.3442	63.0061	71.2754	55.4568	45.6122	22.8543	43.4378	27.7688	34.8732	51.3635	19.964	35.779	66.1571	44.2913	41.2578	48.8702	79.9592	49.5196	23.7474	29.9638
GRMZM2G472903	chr7	114559524	114565663	0	0	0	0	0	0	0	0	0	0	0	0	0	0	0	0	0	0	0	0	0
GRMZM2G071034	chr2	3089968	3094480	125.343	148.867	135.068	129.089	133	153.193	110.386	135.027	117.877	115.488	147.451	106.569	114.068	139.682	121.55	156.647	117.336	140.26	128.383	91.3976	171.752
GRMZM2G107739	chr6	153498772	153503669	201.044	442.812	211.658	271.198	75.6781	84.944	201.54	90.1173	49.8404	190.982	196.447	90.9309	41.0491	116.983	147.905	246.202	325.39	384.431	80.9641	122.347	323.391
GRMZM2G124243	chr5	4608147	4611805	52.7266	105.332	53.4783	102.72	41.9497	81.1596	58.055	83.8627	90.0722	55.4002	68.9652	70.0743	66.5601	73.6461	39.5462	78.3211	82.6934	70.2012	59.8994	48.4868	67.7125
GRMZM2G007736	chr4	61407784	61412772	0	0	0	0	0	0	0	0	0	0	0	0	0	0	0	0	0	0	0	0	0
GRMZM2G306919	chr1	64885892	64889912	7.49022	2.30647	5.93516	13.9163	0	9.51379	0	22.4516	0	0	7.74254	0	0	3.92946	13.11	2.94585	29.5307	5.62163	22.7259	0	7.14623
GRMZM5G823318	chr5	21345358	21349391	132.235	0.985906	127.683	1.25253	203.637	2.25606	2.3765	0	8.01503	0	0	0	135.848	117.132	1.03303	18.3616	0	30.1936	0	0	0
AC211401.4_FG003	chr1	271184908	271186141	50.2154	75.055	60.8268	67.8515	61.4838	76.868	72.3487	68.2968	59.4938	65.4489	68.6158	60.2243	48.5197	87.4279	53.9048	67.826	69.2664	59.8692	72.0061	69.3557	70.9029
GRMZM2G160265	chr7	31323386	31324388	0	0	0	8.59959	0	0	0	0	0	0	0	5.25768	0	0	0	7.97298	0	0	0	0	0
GRMZM2G414848	chr1	224771077	224783687	180.538	251.847	294.546	248.119	242.476	276.657	178.686	280.54	306.821	209.921	184.706	172.336	288.48	254.166	301.237	267.65	192.736	330.416	294.516	276.079	299.064
GRMZM2G567709	chr9	68042017	68042358	0	0	0	0	0	0	0	0	0	0	0	0	0	0	0	0	0	0	0	0	0
GRMZM2G075676	chr10	120278137	120282882	109.844	184.762	112.698	140.073	179.068	166.217	7.34866	153.141	169.074	295.703	209.885	247.465	230.142	3.46639	154.98	168.372	177.242	120.734	265.353	201.287	195.231
GRMZM2G133891	chr5	32879127	32879728	0	0.847848	0	0	0	0	0	0	0	0	0	0	0	0	0	0	0	0	0	0	0.9017
GRMZM2G170826	chr4	114689828	114690501	0	0	0	0	0	0	0	0	0	0	31.9305	0	0	0	11.3971	11.3598	0	0	11.8883	0	0
GRMZM2G162246	chr2	185179875	185180121	0	0	0	0	0	0	0	0	0	0	0	0	0	0	0	0	0	0	0	0	0
GRMZM2G040548	chr4	181629837	181630893	0	0	0	0	0	0	0	0	0	0	0	0	0	0	0	0	0	0	0	0	0
GRMZM2G551402	chr4	201236113	201242311	145.351	157.295	96.898	124.845	116.331	185.353	117.891	111.207	139.674	88.5028	134.768	122.783	189.211	143.117	145.155	100.361	77.9369	128.592	134.298	42.6808	108.593
GRMZM2G026939	chr4	30060007	30061466	0	0	0	0	0	0	0	0	0	0	0	0	0	0	0	0	0	0	0	0	0
GRMZM2G704175	chr9	48965653	48966020	0	0	0	0	0	0	0	0	0	0	0	0	0	0	0	0	0	0	0	0	0
AC233979.1_FG009	chr10	135164261	135169386	91.301	63.6157	82.8125	88.5144	89.0084	76.1602	91.3364	107.028	92.4547	100.811	135.179	87.1528	107.233	109.007	77.6345	101.014	83.9687	110.313	87.709	103.477	84.092
GRMZM2G035477	chr5	183601367	183605622	117.252	125.278	121.139	140.394	81.8343	100.989	121.674	108.624	147.997	93.6789	87.98	127.001	127.485	114.901	101.067	112.244	113.854	93.1704	84.5557	112.214	90.7181
GRMZM2G356142	chr8	77723666	77725116	42.706	44.6822	34.5947	54.314	33.557	59.5105	53.032	52.1155	45.8861	40.5978	28.6649	38.3455	39.9817	64.8936	34.7229	31.8244	38.6623	44.8558	35.5788	26.8687	51.6074
GRMZM2G055520	chr4	32782201	32788841	63.2441	68.8911	56.1949	62.5799	64.6926	70.854	74.8288	54.227	59.8207	72.7434	63.8388	80.4108	58.493	70.5321	66.8932	61.7889	89.6163	61.8565	80.9335	79.8268	79.8096
GRMZM5G877929	chr1	274511970	274512303	0	177.173	206.522	0	0	3.61622	216.273	0	4.8202	0	0	0	0	240.708	352.309	0	0	209.69	0	0	3.66842
GRMZM2G301536	chr7	138995536	138999433	36.3169	34.0471	35.9635	40.0884	43.5064	14.601	45.7568	42.2919	15.0509	39.2809	41.8783	33.8559	41.1764	38.9223	44.9703	36.6185	35.225	34.5559	33.2224	26.9981	54.7805
GRMZM2G042032	chr1	43133286	43136676	63.7174	73.2319	124.197	114.809	93.721	139.033	102.452	124.863	131.056	105.536	112.501	111.625	126.462	101.157	145.817	77.8473	121.536	75.049	74.112	103.986	105.406
GRMZM2G146192	chr4	2481256	2484641	74.4034	163.991	102.095	93.5917	99.9185	64.7553	95.1503	97.5865	66.4705	79.6584	102.344	77.466	57.8133	87.9521	58.2549	168.5	82.285	135.668	81.3449	162.61	87.0665
GRMZM2G153178	chr5	74143611	74148862	18.8954	26.6079	27.0714	15.7595	13.7262	14.7238	24.7005	35.2256	28.9515	38.9035	17.3204	14.2438	15.2937	117.813	29.6362	36.1513	30.4997	87.2621	29.0864	33.4749	30.6967
GRMZM2G095441	chr9	88566511	88567554	0	0	0	0	0	0	0	0	0	0	0	0	0	0	0	0	0	0	0	0	0
GRMZM2G147560	chr7	26964761	26967940	55.1213	46.7942	36.7576	25.6805	38.4578	58.6223	36.4341	25.9505	17.8654	17.0322	35.8321	21.4693	48.8178	37.0431	28.5025	18.2965	19.6398	43.3954	42.1432	15.1414	34.5969
GRMZM5G859130	chr5	209949475	209949988	34.0766	18.7527	32.9003	26.2975	21.2122	21.1419	27.6501	13.7401	33.3421	9.42414	20.3029	6.94086	15.0743	11.6261	71.1532	70.9134	66.2328	19.4389	30.5035	16.5877	15.2302
GRMZM5G895419	chr2	93180511	93181218	0	0	0	0	0	0	0	0	0	0	0	0	0	0	0	0	0	0	0	0	0
GRMZM2G102059	chr2	15022548	15024592	16.83	9.81892	13.0749	11.3311	12.5843	12.427	11.3915	13.2315	12.0348	14.5943	14.0049	12.5717	11.2395	8.6867	13.6845	11.0295	10.8995	14.3074	13.6897	12.9258	9.95811
GRMZM2G135688	chr1	226764807	226776303	18.8576	45.6775	22.2945	38.0068	41.0758	25.2243	31.7916	37.2957	36.5814	27.5698	34.3599	26.5911	49.5355	34.0708	56.2421	35.1898	38.4205	27.6635	24.404	20.5088	37.1276
GRMZM2G050333	chr9	24456327	24458949	14.9914	27.539	31.5743	21.3508	30.1105	23.5058	25.6211	30.2245	36.7297	25.0576	26.0977	26.4549	25.3119	26.7833	34.4533	27.0226	22.8842	41.304	37.3796	29.0009	24.7053
GRMZM2G139349	chr8	171761325	171763455	1281.13	1288.64	1018.63	1074.8	903.468	1046.25	1218.46	1148.61	1073.06	1185.94	1343.88	932.113	996.5	997.154	1247.96	1005.75	1238.26	814.475	727.501	817.202	1168.43
GRMZM2G173721	chr2	236180755	236185182	58.8478	28.4959	41.6828	27.397	67.8461	89.3275	40.5786	29.0753	32.6999	73.6629	36.2748	25.728	33.8341	29.1489	58.8675	77.6333	82.8984	14.7769	33.6995	24.699	29.233
GRMZM2G161666	chr6	93493645	93495861	0	0	0	0	0	0	0	0	0	0	0	0	0	0	0	0	0	0	0	0	0
GRMZM2G315558	chr4	165529121	165531087	0	0	0	0	0	0	0	0	0	0	0	0	0	0	0	0	0	0	0	0	0
GRMZM2G704414	chr7	20711595	20712625	0	0	6.25831	0	0	0	0	0	0	0	0	0	0	0	0	0	0	0	0	0	0
GRMZM2G397148	chr4	62413641	62414442	0	0	0	0	0	0	0	0	0	0	0	0	0	0	0	0	0	0	0	0	0
AC234185.1_FG004	chr8	72745240	72751022	63.3153	92.2868	63.0953	82.7517	182.186	76.9322	91.4418	75.8778	93.8435	95.7989	79.2107	120.343	65.4411	73.9386	237.555	93.9744	70.608	79.926	83.5266	83.6579	100.89
GRMZM2G092599	chr10	134439510	134441032	30.6345	35.1154	23.655	32.7223	20.7009	50.0072	29.5754	32.1575	40.5557	27.8803	31.3799	36.3668	28.7877	46.4938	23.7382	34.53	27.4839	13.9483	29.7859	30.3184	43.4529
GRMZM2G303419	chr5	77571905	77574552	4.32683	5.19596	13.9898	6.46454	4.95399	13.7464	0	2.74758	0	0	45.0775	0	7.37048	10.9935	2.76096	4.07987	5.90845	0	4.86696	9.22848	9.81326
GRMZM5G889372	chr9	136475635	136480652	97.8234	103.214	81.538	104.279	84.4463	122.315	99.3093	98.5233	118.241	95.2309	112.424	81.7806	101.172	117.763	78.5393	96.2731	107.205	88.8654	101.557	88.3451	99.9555
AC205619.3_FG003	chr1	238177924	238180072	0	0	0	0	0	0	0	0	0	0	0	0	0	0	0	0	0	0	0	0	0
GRMZM2G031352	chr8	162506999	162519838	78.5931	130.608	92.6672	139.893	120.491	129.953	75.5739	136.576	128.581	114.867	90.7744	115.247	100.261	102.363	117.466	130.64	97.9828	99.8	114.103	95.483	130.074
GRMZM2G111293	chr4	236951631	236952544	0	0	0	0	0	0	0	0	0	0	0	0	0	0	0	0	0	0	0	0	0
GRMZM2G113662	chr10	75073166	75075227	5.13845	5.20911	4.38748	5.00144	3.11684	4.23833	4.2851	6.72315	4.47866	3.51656	2.97877	4.90465	2.19396	5.73153	3.75752	4.18511	6.00564	3.64569	3.9475	6.65513	3.28829
GRMZM2G037015	chr3	220767490	220769553	26.5491	34.3155	32.9052	24.0347	40.9587	30.2096	23.8929	20.6986	29.9775	69.9099	28.4132	28.1097	19.1569	28.2719	27.1455	24.5892	21.3722	41.3512	29.8615	23.0104	39.5213
GRMZM2G148594	chr10	143488040	143497995	47.0491	53.6394	46.8872	55.0552	47.075	54.5257	54.9746	55.9072	47.6139	51.0943	38.6951	44.4253	47.3636	51.2519	36.8386	53.2789	33.2898	34.0668	49.7882	43.7462	47.1594
AC208434.3_FG007	chr1	204433980	204435070	0	0	0	0	0	0	0	0	0	0	0	0	0	0	0	0	0	0	0	0	0
GRMZM5G857369	chr7	106499979	106500911	0	0	0	0	0	0	0	0	0	0	0	0	0	0	0	0	0	0	0	0	0
GRMZM2G457411	chr3	115005662	115007783	16.5298	18.858	17.6883	15.8919	13.9924	10.9887	23.0944	14.0949	14.0512	19.7973	13.7147	13.0695	18.3683	16.2657	22.4732	10.8022	15.2881	14.2641	15.2274	17.4934	12.322
GRMZM2G116538	chr10	132885220	132904026	58.7851	50.5758	44.6315	40.5684	0	45.6298	29.6292	40.1676	17.9822	27.9885	46.9749	12.5999	0	8.51306	23.7509	24.0716	55.1622	27.4598	26.7339	17.055	45.237
GRMZM2G161625	chr5	158363955	158374909	8.02866	5.53106	4.27502	4.00391	0	3.96237	10.313	4.39918	0	8.75802	4.5993	0	0	0	0	0	0	0	4.0411	0	6.18276
GRMZM2G126765	chr4	177642842	177645152	64.2342	50.7501	72.9803	88.3916	54.2114	92.1387	58.0477	91.9981	41.9193	75.6518	54.7545	47.6216	61.6087	33.3996	57.9851	76.9363	36.736	36.7977	68.7893	50.0248	70.6291
GRMZM5G877649	chr2	52039794	52041181	0	1.9637	0	0	0	0	0	0	0	0	0	0	0	2.6218	0	0	0	0	0	0	1.87489
GRMZM2G414639	chr1	92160380	92166425	0.11133	1.43561	0.11994	0.192015	0	0	0.303042	0.310315	0.212294	0.128925	0.258713	0.166016	0	0.522345	0.150837	0.336874	0	0.214361	0.0647281	0.177777	0.268092
GRMZM5G873389	chr2	101255466	101256643	6.28352	7.27182	5.61244	8.22667	4.85544	7.4853	7.02241	9.49016	5.60625	4.08342	4.38095	6.74386	4.10237	7.68029	5.07665	4.43977	7.2711	5.13145	6.15749	12.2122	4.83911
GRMZM2G460542	chr6	161245408	161248452	0	0	0	0	0	0	0	0	0	0	0	0	0	0	0	0	0	0	0	0	0
GRMZM5G865071	chr3	83782335	83782827	0	0	0	0	0	0	0	0	0	0	0	0	0	0	0	0	0	0	0	0	0
GRMZM2G354295	chr6	29276733	29281966	0	0	0	0	0	0	0	0	0	0	0	0	0	0	0	0	0	0	0	0	0
GRMZM2G132966	chr2	138892764	138893204	0	0	0	0	0	0	0	0	0	0	0	0	0	0	0	0	0	0	0	0	0
GRMZM2G074053	chr5	194091469	194093498	385.236	444.131	993.026	771.694	705.593	595.447	446.165	530.884	293.471	534.222	810.563	314.812	354.361	354.636	646.931	361.708	357.2	659.002	583.066	359.646	548.773
GRMZM5G893444	chr10	131888156	131892103	63.0963	91.6852	79.8989	90.042	105.544	99.1486	93.7669	75.7848	87.3073	46.9481	65.1987	37.6882	74.8015	103.999	83.1609	86.9992	55.4872	101.695	128.395	49.5013	78.3733
GRMZM2G004163	chr10	12101614	12102400	0	0	0	0	0	0	0	0	0	0	10.352	0	0	0	0	0	0	55.3041	0	0	0
GRMZM2G093119	chr3	167362918	167372271	93.5393	137.92	111.242	147.222	106.671	122.148	158.515	145.353	134.334	131.074	130.149	100.177	121.104	153.248	130.784	107.378	141.443	107.201	153.384	114.91	138.727
GRMZM2G166857	chr2	229898385	229900696	18.2922	6.71729	19.835	8.37332	0	6.214	7.39062	13.1694	6.89761	5.26172	6.86409	9.65649	6.6994	5.41508	14.1753	13.6406	5.69003	0	7.07583	10.8543	15.5134
AC204437.3_FG004	chr10	145202942	145203656	0	2.66506	0	3.37056	0	3.94128	0	10.1499	5.36359	0	0	0	0	0	0	1.37786	0	0	0	0	1.32463
GRMZM5G824689	chr2	169527688	169528070	0	0	0	0	0	0	0	0	0	0	0	0	0	0	0	0	0	0	0	0	0
GRMZM2G703769	chr1	148575104	148575687	0	0	0	0	0	0	0	0	0	0	0	0	0	0	0	0	0	0	0	0	0
GRMZM2G380561	chr8	120768104	120771539	32.986	19.627	45.4509	37.6596	32.0571	31.2045	14.704	34.3653	15.3246	34.3292	8.01226	16.6953	21.8235	22.5268	22.8418	16.4438	22.4351	12.9027	27.5357	23.4018	34.2774
GRMZM2G330526	chr10	129121566	129123614	53.3302	38.7064	32.4784	33.7047	36.7875	39.3639	36.0804	35.4294	28.8393	40.5624	50.5225	39.8383	37.3789	34.189	38.4441	35.0376	44.1259	36.8019	46.9064	39.4043	37.2862
GRMZM2G124423	chr1	166862686	166864424	21.5052	27.6143	19.4472	15.361	15.1859	13.4494	16.5134	22.6308	25.0057	19.8367	14.8963	15.5937	13.2584	22.31	33.5441	23.7185	19.7072	28.9498	25.4108	24.1498	20.7186
GRMZM2G316635	chr3	216267757	216276132	49.6221	46.5785	34.5649	55.1197	40.6931	55.9888	52.1505	51.8058	52.532	45.5747	48.5115	50.5367	45.8068	48.0729	48.7028	37.0108	47.6903	35.2449	38.3748	46.1464	43.9262
GRMZM2G105368	chr3	89931968	89935733	24.3458	55.8858	42.7671	34.2659	47.4965	57.5197	31.3917	35.128	51.4719	160.303	52.1511	41.4881	59.2977	162.54	46.0683	47.9696	58.9119	45.5046	41.8912	152.577	178.227
GRMZM2G128219	chr4	122677471	122678792	29.0378	15.55	36.1333	35.661	40.0371	9.74875	18.4515	7.23788	13.3806	45.4105	31.1728	25.6557	46.2852	27.2693	102.825	16.102	32.2502	17.6024	18.6168	17.8025	74.9131
GRMZM2G559610	chr8	67443902	67447952	0.296538	4.66139	0.563856	1.44867	1.10642	2.01061	0.410067	0.0908341	0.334466	5.49721	28.8902	1.12202	11.1627	3.13115	5.55782	0.23806	8.3843	2.63322	4.55364	0.757292	8.80343
GRMZM2G103773	chr1	249311155	249315418	38.0012	38.3777	47.1037	28.2789	30.6749	41.278	32.7939	20.9981	21.0777	31.254	32.1177	31.8157	24.6888	21.9364	22.6543	32.8635	23.228	14.5074	25.5767	22.479	49.5976
GRMZM2G448715	chr2	205059739	205063183	66.8035	67.8824	65.6578	62.9581	76.4822	66.04	57.6145	63.1298	59.8191	57.5505	0	9.92309	79.1451	76.663	75.677	62.0191	75.6336	48.0928	70.0397	60.2981	63.6766
GRMZM2G142999	chr9	125563699	125564837	0	0	0	0	0	0	0	0	4.62389	6.48362	0	0	0	0	0	0	0	0	0	0	2.51027
GRMZM2G359746	chr2	186383512	186385924	0	0	0	0	0	0	0	0	0	0	0	0	0	0	0	0	0	0	0	0	0
GRMZM2G023347	chr5	17318915	17321831	37.2781	54.1952	72.6718	61.62	67.9331	101.162	97.9551	66.3939	54.0414	86.5535	62.9754	59.0449	80.2623	79.3968	64.964	79.7775	49.957	60.4639	54.3397	77.2608	75.1899
GRMZM2G450920	chr1	292340666	292353571	47.0425	59.5302	49.9891	80.5548	53.2566	61.5556	73.9559	91.7986	73.4956	47.8935	70.6499	64.5488	55.8271	80.1019	63.2657	62.36	63.8461	62.3509	64.5892	66.3667	67.8644
GRMZM2G089750	chr7	53021652	53023070	0	0	0	0	0	0	0	0	0	0	0	0	0	0	0	0	0	0	0	0	6.65799
GRMZM2G169013	chr2	7859325	7861362	27.7712	0	14.9083	0	41.1442	0	0	24.5431	34.8575	0	0	0	0	0	0	0	0	0	18.2952	0	0
GRMZM5G838433	chr1	57355273	57356321	24.1754	24.8077	49.3528	41.7298	38.3419	70.2936	89.2021	12.5211	45.3086	51.2534	19.2627	85.4263	66.4596	71.8408	9.94073	23.8044	29.9951	32.4037	90.4672	145.938	24.697
GRMZM2G150532	chr1	159434953	159435907	0	0	8.47217	0	0	4.05209	0	17.3211	0	0	0	0	0	0	13.172	7.16674	11.2073	0	27.6847	37.1085	6.04586
GRMZM2G148702	chr9	88648079	88652066	23.68	21.1848	19.4499	20.1019	19.3239	22.6998	9.69043	16.4134	27.8088	10.9835	15.7579	19.3749	13.5868	16.4377	21.1438	32.9948	16.4113	18.4504	15.8948	16.3997	15.4877
AC199421.3_FG001	chr1	247168660	247169113	0	0	0	0	0	0	0	0	0	0	0	0	0	0	0	0	0	0	0	0	0
GRMZM2G310505	chr10	84164710	84165705	4.64627	3.89439	1.41318	0.545047	0	6.85602	0	1.17696	0	25.3747	0.902843	5.38742	0	20.3582	0.555531	1.82093	2.28117	0	28.1372	0	1.43656
GRMZM2G177878	chr9	144611864	144615286	8.25265	6.40422	8.5612	10.2363	26.7967	10.0693	10.1891	8.9991	21.7255	10.5068	25.1251	8.9763	19.0626	11.5419	14.1585	10.9234	10.4403	20.5173	19.3851	0	8.96631
GRMZM2G436084	chr4	195916755	195918707	177.137	296.118	264.172	167.492	212.639	129.469	88.4126	201.217	283.324	182.251	262.304	146.441	83.805	251.072	285.826	193.255	300.54	226.121	179.227	128.329	218.947
GRMZM2G058441	chr4	128993259	129001892	15.0446	15.4091	9.84774	17.7821	7.96661	13.1195	21.1464	12.9656	13.2746	20.8193	15.3007	0	0	12.576	19.6906	14.8734	18.0018	14.4819	23.5605	0	14.3918
GRMZM2G044733	chr4	213961462	213964607	18.2479	19.464	16.7684	21.8417	27.9185	17.1209	23.3776	20.9265	26.5159	20.4601	22.2081	21.7164	23.6207	19.6602	27.0184	26.4702	28.1507	23.2538	25.3432	21.9034	26.6898
GRMZM2G015212	chr6	91994580	91995887	8.32391	0	44.2944	79.3205	13.9449	13.5098	25.6359	37.1459	12.1713	49.4011	21.4265	0	22.9715	32.78	0	23.1135	15.6531	24.0586	20.4729	15.9461	14.5948
GRMZM2G085670	chr7	149855389	149860435	93.5128	103.128	105.544	62.7605	53.501	67.3022	54.5092	88.4946	59.4696	82.1084	84.1528	100.421	60.1258	68.2027	97.4405	106.809	119.857	90.3028	94.4434	85.6564	66.6741
GRMZM2G312434	chr2	216612561	216615209	0	2.93433	2.15581	2.6924	0	2.78891	0	2.59183	6.01606	3.37588	0	0	0	2.33814	3.88242	4.02967	0	2.39647	2.04052	0	3.27632
AC209698.3_FG004	chr1	195144975	195145377	0	0	0	0	0	0	0	0	0	0	0	0	0	0	0	0	0	0	0	0	0
GRMZM2G703366	chr2	211124638	211125833	0	0	0	0	0	0	0	0	0	0	0	0	0	0	0	0	0	0	0	0	0
GRMZM2G317270	chr4	198375554	198379035	0	0	0	0	0	0	0	0	0	0	0	0	0	0	0	0	0	0	0	0	0
GRMZM2G046348	chr4	153749854	153753146	158.47	149.121	159.898	144.156	113.47	154.788	163.646	131.984	159.699	78.0007	167.964	205.566	143.861	204.764	163.635	186.876	66.1683	145.864	147.791	158.315	133.708
GRMZM5G873335	chr7	120254479	120256169	78.5628	66.6307	57.5103	136.406	74.3514	154.833	154.676	116.613	118.484	141.52	92.0851	212.7	79.3682	107.086	72.03	93.4257	66.3167	62.8123	72.3975	67.0649	77.8721
GRMZM5G884325	chr1	32321850	32328441	258.721	206.312	166.556	193.772	182.471	201.503	208.91	207.211	192.479	233.368	242.975	202.023	143.775	182.489	195.947	168.335	317.931	143.821	179.427	198.376	208.649
GRMZM2G150884	chr9	29402607	29403804	68.76	67.1378	49.5606	36.6431	25.129	58.4087	18.3051	62.9011	50.2928	45.5694	48.9712	36.0203	22.5438	50.6224	36.3005	64.818	42.9918	34.7509	48.3383	59.111	56.4352
GRMZM2G068519	chr7	38539989	38542053	0	13.204	0	0	0	0	0	11.653	0	0	0	0	0	9.56266	2.69393	0	28.9841	0	9.25344	11.5484	11.9359
GRMZM2G083453	chr5	37625051	37626359	64.6416	43.488	29.8068	52.4737	43.6794	32.5426	54.4117	34.0586	34.0196	35.3434	92.1454	80.2038	44.2521	35.1098	29.5433	42.9225	43.8157	0	28.2084	39.4912	37.7775
GRMZM2G176375	chr2	233627183	233628270	217.496	320.55	216.503	127.791	94.8549	117.16	141.208	179.612	125.87	179.133	107.909	60.5007	114.024	233.512	128.551	212.287	223.655	226.427	135.143	135.142	279.15
AC191927.2_FG002	chr6	114269542	114269977	0	0	0	0	0	0	0	0	0	0	0	0	0	0	0	0	0	0	0	0	0
GRMZM2G013471	chr3	29968940	29973994	74.7772	79.2213	58.6961	71.9278	33.3896	79.5749	40.3257	64.0154	67.1982	40.7069	45.4678	37.1144	74.4302	116.834	69.9288	76.4956	105.904	66.2725	37.6482	43.4095	36.0884
GRMZM5G872217	chr5	3856746	3861675	34.8449	35.4895	36.8719	67.4983	47.1829	41.3715	32.0185	58.7152	39.2409	25.0405	36.842	36.6977	43.1496	42.6925	27.5432	47.9129	41.3476	38.912	37.0979	22.3391	43.8033
GRMZM2G302171	chr3	181616554	181617267	145.527	174.275	272.731	128.139	62.1626	158.478	67.6659	95.0259	179.552	98.3426	45.8291	117.019	43.4834	118.165	120.037	173.375	48.0637	75.2096	140.497	149.95	167.02
AC189795.3_FG001	chr10	144935717	144936437	0	22.6902	18.1065	0	0	0	0	22.0306	0	0	0	0	0	0	2.85949	17.3979	0	0	0	0	0
GRMZM2G430482	chr4	139904758	139906227	0	0.260748	0	0	0	0	0	0	0	0	0	0	0	0	0.0803255	0	0	0	0	0	0
GRMZM2G108565	chr9	25465416	25471657	38.6673	46.4693	55.5456	53.3971	24.7404	18.3493	14.3223	38.1166	68.3879	39.6844	20.2464	44.2828	37.1737	32.5	48.4117	79.0229	13.363	43.7048	34.2831	28.9317	50.4394
GRMZM2G013187	chr3	35409085	35409899	0	0	0	0	0	0	0	0	0	0	0	0	0	0	3.98276	0	0	0	0	0	0
GRMZM2G461566	chr3	104526510	104536068	0	3.77457	0	0	0	0	0	5.97605	8.13026	0	0	0	0	7.50403	2.03761	0	6.25039	0	0	0	0
GRMZM2G110408	chr9	110657202	110661628	864.913	836.961	668.034	881.767	720.279	955.224	1091.26	856.966	872.057	766.89	1102.82	647.554	752.886	1153.89	801.713	746.703	1000.59	793.768	966.587	701.902	778.465
GRMZM5G829928	chr4	183905612	183908647	351.743	370.267	319.266	279.434	181.381	255.287	326.067	206.24	224.087	340.162	335.04	267.541	231.14	396.64	208.104	204.144	249.336	190.955	252.836	503.772	315.033
GRMZM2G334142	chr5	206307946	206316209	19.1959	19.061	16.5605	30.5002	26.0751	21.807	25.8162	16.6071	26.14	20.3145	26.8862	18.5748	24.2774	23.0983	21.8037	19.8791	19.6696	22.2276	18.795	20.8177	25.8868
GRMZM2G016382	chr3	146784759	146789222	28.217	20.8721	19.9172	32.3099	23.1232	28.0254	28.1995	34.3748	26.5177	26.0106	21.2449	25.239	20.754	34.1391	22.1548	33.1475	26.8407	24.179	20.5295	33.9528	25.0556
GRMZM5G882427	chr2	6627234	6628889	15.9635	31.3703	28.1237	5.24365	15.8364	7.67899	0	19.6814	15.1335	3.99114	25.1347	16.5245	0	19.8325	26.7185	22.3747	11.9643	26.0935	44.808	0	3.81826
GRMZM2G058402	chr1	204683832	204695252	111.857	224.74	14.2475	205.458	126.692	73.4457	67.7369	130.154	177.463	89.1203	227.71	86.3788	64.4306	57.7019	164.577	99.0766	108.337	213.202	171.031	67.527	85.706
GRMZM5G873681	chr5	28194893	28196950	37.2628	73.7386	134.92	31.635	99.7181	79.8453	64.6567	97.334	88.7066	41.5954	48.5217	59.6485	121.065	224.437	140.993	126.515	47.7642	42.0747	141.304	78.6105	252.126
GRMZM2G019578	chr3	221793315	221794229	0	0	1.78196	0	0	0.739821	0	0	0	0	0	0	0	0	0.548996	0	0	0	0	0	1.30666
GRMZM2G145029	chr8	104659885	104663941	126.14	93.4757	142.618	100.447	113.832	139.559	115.588	105.279	141.271	112.193	127.274	136.824	124.307	131.176	131.825	105.442	88.3354	130.183	114.215	101.986	157.215
GRMZM2G700021	chr9	138412355	138413071	0	0	0	0	0	0	0	0	0	0	0	0	0	0	0	0	0	0	0	0	0
AC190560.2_FG002	chr3	189972726	189974162	19.852	5.33336	4.70737	4.50136	5.55409	19.4077	15.4565	18.2981	0	11.1602	10.0486	5.57802	19.2111	6.24019	14.6901	12.0302	14.6657	9.80694	5.17943	15.1138	8.40531
GRMZM2G420772	chr7	1266504	1267163	28.4565	12.7668	25.1089	0	84.7708	0	0	12.37	0	73.463	0	34.6832	36.0413	33.054	81.968	0	0	15.4831	69.5917	124.474	16.0092
GRMZM2G086590	chr4	202423700	202440421	44.5814	24.7029	76.3245	13.3988	18.7749	42.651	13.3474	16.9987	79.1987	0	21.0872	28.0109	52.9592	43.1456	21.0305	11.5609	10.7906	18.9385	50.2027	11.6735	47.7065
GRMZM2G011636	chr3	1672505	1677401	131.772	126.463	186.795	151.965	83.7894	144.862	81.208	148.231	130.645	150.863	97.6018	123.544	130.582	191.867	166.79	184.616	88.8626	179.909	196.95	152.235	188.044
GRMZM2G476914	chr1	29196147	29198817	42.6423	50.1021	45.406	43.6928	30.2133	39.9654	64.1993	46.2891	50.1437	38.9941	48.3377	39.1574	36.3078	51.3651	42.7473	36.7658	46.2674	34.4627	55.7866	45.3293	45.6669
GRMZM2G075260	chr5	204809424	204814007	68.1086	53.0928	57.3659	66.3499	37.1371	54.3993	54.9125	81.2401	58.4134	84.0061	65.6756	58.136	52.9974	43.507	62.0699	34.1917	54.4978	37.8549	46.6959	71.6914	44.4874
GRMZM2G019621	chr10	125214056	125219916	23.777	27.416	22.1024	29.2459	16.4201	24.3091	30.679	26.7434	24.2011	20.2244	22.7146	21.8096	29.302	25.3167	21.2475	33.5676	21.667	13.2557	19.9982	27.4624	24.2128
GRMZM2G035156	chr1	15133982	15136082	61.1977	90.0447	71.5854	21.2264	20.7277	57.7844	30.0441	48.5184	40.4424	20.0258	20.3918	49.2207	31.3758	52.5033	20.0907	62.0018	22.9251	25.0126	20.8504	27.3656	41.9807
AC199526.5_FG001	chr3	58942312	58942903	25.6823	2.41196	21.6231	0	0	0	0	0	17.4365	0	0	0	0	0	0	22.2292	0	3.77268	0	0	8.39112
GRMZM2G062761	chr6	165947456	165953178	45.3965	55.6518	39.2293	57.7349	36.1656	58.639	53.2331	45.3246	22.2997	40.9226	54.936	44.3909	49.3678	49.8649	35.2942	45.5395	33.9177	36.3673	52.4954	61.0501	45.6946
GRMZM2G362897	chr3	163861065	163863449	0	0	0	0	0	2.44242	0	0	0	0	0	0	0	0	2.85367	0	0	0	0	0	0
AC190909.3_FG004	chr5	64335785	64339361	62.372	63.4578	57.9799	98.4219	106.243	94.5005	74.8919	89.0175	121.06	96.3089	74.9308	55.6357	123.073	99.9025	131.379	78.7374	64.9638	83.893	88.5422	79.2908	74.3874
GRMZM2G326248	chr1	64012255	64014810	0	0	2.64743	3.50115	5.82603	5.11585	0	6.7286	3.98425	6.8611	11.3685	0	4.78831	9.00681	4.83412	4.9928	5.70274	3.2354	2.86352	0	8.24069
GRMZM2G092167	chr4	183615832	183617751	8.1075	13.8903	12.8246	10.7043	11.5476	27.2224	22.1775	20.5787	12.8298	9.70506	9.0793	11.004	33.1692	6.26544	7.79326	0	11.0945	23.2179	9.5277	17.6926	13.0657
GRMZM2G041308	chr8	4348464	4350696	73.5302	35.4726	355.583	4.85872	11.9705	80.9866	37.4084	46.2794	65.3935	17.2991	54.4945	185.316	21.5605	17.436	9.74339	36.558	29.5389	15.1194	6.66388	53.3008	35.1816
GRMZM2G137211	chr7	132805224	132810409	58.3419	83.3269	65.4633	96.952	95.3596	96.3133	68.6993	94.4039	74.7794	110.794	87.8341	75.1009	83.5809	76.8626	65.0884	56.7962	63.9397	51.7237	68.1729	84.1455	63.8443
GRMZM2G464895	chr6	106736450	106738078	24.273	67.6293	64.7361	9.22104	35.333	31.5566	0	19.3904	32.1349	10.6185	4.79747	9.11343	30.8237	5.51755	59.5756	39.6397	38.5789	9.75372	35.4849	10.3379	60.1212
AC212449.4_FG004	chr5	174890975	174891830	0	0	0	0	0	0	0	0	0	0	0	0	0	0	0	0	0	0	0	0	0
GRMZM2G160927	chr1	212287663	212305641	61.7278	48.6694	141.708	72.6722	71.1918	85.0025	80.309	87.7674	61.3991	64.3574	59.5659	76.7536	64.4795	70.6961	57.1598	72.864	69.5409	53.1813	73.862	65.0603	82.8694
GRMZM2G443180	chr5	178351694	178352966	0	9.92245	7.7717	0	16.4906	3.27634	0	0	15.8626	0	7.72864	6.91136	0	9.89625	9.76105	0	7.39562	10.6475	0	0	1.91979
GRMZM2G079083	chr5	15193400	15197652	258.586	293.08	204.219	205.685	223.878	157.419	196.269	162.364	198.258	151.243	239.774	202.122	118.67	183.968	218.487	174.961	206.606	209.613	204.835	282.915	189.655
GRMZM5G881965	chr2	20925021	20926430	30.8894	30.3996	34.6733	30.2006	22.6836	29.2483	18.2178	50.8113	37.7814	30.0699	30.1099	37.8617	19.7561	37.0822	29.7588	36.4115	43.8876	38.6952	39.049	20.4665	35.8767
GRMZM2G155217	chr2	7958754	7962107	34.9861	37.4579	36.1277	41.0877	38.351	41.9139	22.1262	23.1861	50.2179	36.9049	27.657	23.4719	41.2123	30.6651	55.2143	46.1485	48.7752	33.8969	45.813	29.208	53.8894
GRMZM2G018006	chr9	23951801	23955582	61.3302	57.413	53.4213	66.0173	65.6917	72.4121	66.7054	55.2908	65.8552	53.1893	78.7013	58.2188	58.9798	87.4213	72.3019	56.0106	61.797	57.727	85.3945	43.9754	53.1885
GRMZM2G037778	chr6	14029761	14031462	5.9971	8.17153	2.02517	21.9964	35.9269	9.95107	62.1845	24.5538	11.1572	9.6445	15.4819	9.08844	66.3876	68.9953	21.1718	18.2954	31.9324	9.02635	16.838	17.0739	54.3691
GRMZM2G167809	chr3	203578987	203582740	243.312	258.058	225.221	268.843	247.829	254.277	223.84	257.082	235.087	283.235	292.451	250.582	234.326	255.408	217.473	266.23	248.966	201.271	248.474	259.645	286.899
GRMZM2G005960	chr2	210752942	210754055	0	0	0	0	0	0	0	0	0	0	0	0	0	0	0	0	0	0	0	0	0
GRMZM2G080537	chr5	186942056	186945651	26.5456	46.5962	47.9605	37.064	34.5694	35.6551	20.2601	35.7463	30.6532	14.1808	17.8525	27.6563	31.3343	13.5468	43.2912	35.1653	43.0091	72.9082	27.0176	24.1642	60.2768
GRMZM2G443668	chr7	7495433	7502357	108.558	76.6201	69.334	97.8096	86.4445	99.6496	70.11	79.6679	68.8552	96.6416	85.2616	72.2446	105.489	97.023	91.1347	106.75	78.183	59.6518	114.231	82.1186	97.2154
GRMZM2G348921	chr9	24699470	24700777	51.6324	46.8684	46.0032	65.5818	47.4254	57.8285	41.8798	66.2549	45.3733	58.3727	57.1532	56.0467	52.6374	46.4996	43.1164	41.2764	54.97	42.4531	46.6433	56.9783	63.6417
GRMZM2G093422	chr6	161903895	161906202	0	1.2349	0.25666	1.77027	0.412874	0.103851	0	0	0.208736	0	0.31608	0	0	0.145063	3.11064	0.314346	0	0.234606	0.0962605	0	0.294166
GRMZM2G147288	chr4	116863146	116868962	23.9635	24.5077	17.4856	29.021	26.5253	28.5393	25.4235	28.9167	28.1858	25.6516	21.6735	26.7612	28.0078	23.6482	30.8027	20.5516	23.3451	19.918	24.3923	29.7575	24.2026
GRMZM5G870080	chr2	11378191	11382207	22.0281	48.8895	35.3977	28.4016	54.9724	69.5225	67.9689	34.921	47.5402	31.1223	40.6302	32.4716	28.1209	33.0758	38.455	42.6686	35.2095	24.9775	37.0085	32.8433	50.055
GRMZM2G170890	chr9	128653025	128655887	132.809	57.0729	71.7715	77.257	120.707	91.1464	62.1888	84.8141	67.7299	175.678	125.877	73.6236	100.687	52.7236	94.8651	99.1659	101.249	130.061	82.8758	122.761	107.104
GRMZM2G082931	chr2	232964581	232968333	83.982	61.749	47.2529	66.933	39.4627	52.4447	65.8449	56.5937	66.5044	63.934	71.3246	95.7479	21.6092	55.2392	44.745	37.7074	75.4623	32.6326	48.7562	61.0814	71.3494
GRMZM2G071089	chr5	128105439	128107392	860.021	504.757	645.275	726.898	342.874	630.246	680.034	758.447	402.165	438.4	652.096	535.918	340.931	653.982	257.113	528.109	228.458	364.905	488.446	596.74	512.062
GRMZM2G083346	chr5	916867	919841	31.4023	33.9275	39.3908	44.7412	33.5437	63.5734	44.2457	51.7323	50.3153	55.6488	47.2913	58.2994	62.9776	47.3483	54.8145	26.0174	35.2545	34.0706	43.7203	46.7628	49.5264
GRMZM2G001421	chr8	26345051	26350246	217.328	160.354	170.245	167.748	77.9196	224.924	197.797	93.3458	130.157	81.1814	137.303	116.477	146.369	128.026	124.682	153.858	163.139	116.656	126.445	75.2868	151.11
GRMZM2G704330	chr7	6434505	6436350	0	0	0	0	0	0	0	0	0	0	0	0	0	0	0	0	0	0	0	0	0
GRMZM2G001247	chr2	216665546	216666787	96.1496	213.981	260.883	177.503	71.7645	304.225	101.255	208.618	283.144	118.722	175.161	151.135	214.904	158.061	199.142	143.039	315.36	259.429	194.042	207.096	312.581
GRMZM2G393301	chr3	22250022	22250856	0	0	0	0	0	8.95399	0	8.2175	4.83009	8.84594	0	0	0	0	0	6.96882	0	0	6.78651	0	9.69103
GRMZM2G444546	chr4	205166863	205168029	0	0	1.22142	0	0	0	0	0.208216	0	0	0	0	0	0	0	0	0	0	0	0	0
GRMZM2G042870	chr9	91041391	91045193	69.6859	75.047	74.4972	82.988	58.2249	82.7444	74.8502	67.0005	87.623	74.102	72.9143	65.365	82.2531	76.5221	65.1525	62.3261	62	54.2111	49.8579	77.4571	59.252
GRMZM2G080885	chr4	142868347	142869082	0	0	0	0	0	0	0	0	0	0	0	0	0	0	0	0	0	0	0	0	0
GRMZM2G365754	chr10	5917108	5918148	0	0	8.46507	0	0	0	0	0	0	0	0	0	0	0	0	0	0	0	0	0	0
GRMZM5G863467	chr8	61129921	61130483	3.51386	1.91995	4.51146	2.17317	3.20782	4.42309	4.07102	2.7393	4.26425	1.70308	7.93831	6.34235	0	2.83653	2.75653	2.07415	6.0837	2.55344	2.96405	2.11982	4.38692
GRMZM2G465333	chr9	129188624	129190794	547.869	671.274	677.829	704.26	446.711	611.745	546.23	736.296	635.584	447.696	635.947	502.004	566.989	487.187	544.297	533.481	459.443	473.17	488.318	620.167	546.775
GRMZM5G813709	chr5	180429763	180430340	5.07488	3.56208	5.53275	3.69993	2.0524	2.5219	0	22.5623	0.2617	5.03126	5.03012	0	0	0.792891	0	26.3027	0	2.74547	0.233867	0	0
GRMZM2G082214	chr8	2110919	2115595	104.7	133.806	148.692	181.776	169.502	156.785	106.119	117.9	150.104	147.335	122.948	108.928	180.927	135.333	111.434	137.818	137.058	126.853	134.618	149.178	155.119
GRMZM2G700988	chr6	86439658	86440584	0	0	0	0	0	0	0	0	0	0	0	0	0	0	0	0	0	0	0	0	0
AC215244.3_FG002	chr4	193735480	193760758	454.927	498.707	536.538	508.133	506.42	589.704	443.745	578.51	492.545	446.252	421.877	378.42	513.325	566.806	452.485	535.547	412.629	529.128	437.35	441.98	593.649
GRMZM2G336975	chr2	211665906	211669212	22.431	99.7497	11.2076	12.6371	41.5226	22.4206	42.8343	113.934	38.3088	20.5622	13.2107	25.6223	0	106.304	6.23043	19.6808	111.13	10.5091	119.419	0	21.2294
GRMZM2G042889	chr6	117017736	117028578	57.2603	61.801	50.9061	62.6247	47.4442	66.0553	67.4819	67.1385	59.1484	62.6251	74.1593	60.436	54.0609	81.1022	50.2771	74.4194	67.6109	63.2351	65.6244	60.7495	75.9072
GRMZM2G130401	chr6	99549730	99552477	0	0	0	0	0	0	0	0	0	0	0	0	0	0	0	0	0	0	0	0	0
GRMZM2G383920	chr4	180437023	180437864	0	0	0	0	0	0	0	0	0	0	0	0	0	3.12803	0	4.3404	0	0	3.7507	0	0
EF517601.1_FG009	chr3	34440386	34441145	79.2896	48.3227	73.1853	39.2427	0	0	0	8.52994	8.06583	12.1645	31.1483	31.7106	21.2296	29.1871	12.1536	0	10.2461	27.253	0	19.2269	8.4437
GRMZM2G155332	chr6	132949621	132979467	83.7851	73.3514	74.3289	73.6634	62.2663	67.8606	79.2472	84.4832	85.7294	70.3747	56.1619	98.2088	55.0955	70.4026	62.1068	78.7979	64.3741	70.2941	68.7069	76.4274	83.4774
GRMZM2G461777	chr1	5016716	5017577	0	0	0	0	0	12.7979	0	0	0	0	0	0	0	0	0	0	16.0071	0	0	0	24.4602
GRMZM2G076437	chr5	58142064	58145140	23.0262	30.7032	28.2542	33.3067	23.0488	13.5585	24.4121	10.3629	9.85575	21.1085	0	38.7932	37.9791	42.2332	30.0161	18.1448	33.099	22.6401	38.5891	21.3405	38.6781
GRMZM2G145008	chr1	52764294	52769331	29.5605	61.1437	38.6547	35.6339	32.9606	32.2006	40.0642	56.0221	57.1436	22.5737	37.918	34.892	52.0095	42.9333	49.8712	40.8396	53.5003	37.9992	50.0623	23.7908	47.06
GRMZM2G125032	chr3	151819388	151821475	19.3058	13.9896	14.6562	14.389	17.433	15.9995	0	12.6627	52.83	43.0666	14.4416	11.755	18.1475	21.2613	4.40381	37.7612	14.5232	9.13888	110.23	11.5215	11.7338
GRMZM2G312871	chr5	166056926	166061323	0	0	0	3.24403	0	0	0	0	3.27256	0	0	0	0	5.57074	5.59225	3.4254	0	0	0	5.73116	2.05875
GRMZM2G306328	chr2	178094002	178096407	3.16326	8.8677	5.23235	3.99263	0	3.57411	2.92545	5.35024	4.97407	0	2.17281	0	0	3.91035	3.31497	7.17144	1.8739	0	4.26658	11.7812	1.16637
GRMZM2G356423	chr9	71682515	71724329	12.1265	21.9454	26.8199	38.582	36.1737	39.6408	22.2698	46.2082	37.7893	23.7239	22.1768	27.0257	34.7192	25.5141	43.5751	34.3022	19.9414	29.0748	21.2213	32.5344	41.3362
GRMZM2G178729	chr3	209259526	209260240	0	0	0	0	0	0	0	0	0	0	0	0	0	0	0	0	0	0	0	0	0
GRMZM2G169548	chr8	155590577	155594171	0	16.5487	17.6002	10.9702	12.1301	19.9139	0	22.5239	9.37969	15.9082	19.5425	0	19.1438	28.3821	26.5588	18.5588	17.6707	12.5738	17.8297	0	17.1036
GRMZM2G177596	chr2	83272226	83274067	22.109	35.4291	40.3177	42.4303	46.1285	45.6648	26.2155	46.8535	44.8592	30.8955	21.0869	14.5339	26.4014	45.6254	71.5509	38.315	48.3156	44.9038	39.6205	23.4338	47.0282
GRMZM2G440459	chr2	215089244	215092725	17.9548	31.6302	18.5175	35.8398	46.6306	43.284	23.6978	26.602	44.8807	26.1873	40.2491	24.0254	0	39.0544	33.6799	22.1422	25.5906	28.6772	55.9344	15.2257	18.1735
GRMZM2G451050	chr3	12546215	12551656	0	0	0	0	0	0	0	0	0	0	3.38188	0	0	0	0	0	0	0	0	0	0
GRMZM2G162266	chr2	12902068	12907861	44.8111	55.4488	51.0565	7.10683	46.8727	69.8901	19.8338	54.3491	56.139	0	47.8513	34.6384	15.752	76.5367	52.1346	60.8802	42.8434	50.2994	54.9153	44.6784	53.9614
GRMZM5G851617	chr9	141846025	141846961	5.78014	6.15458	12.2044	0	0	0	0	0	0	5.38383	15.328	0	0	0	5.99217	0	0	20.4109	5.06397	0	5.90184
GRMZM2G064096	chr6	123777181	123778357	5362.36	5678.58	6342.95	8631.92	2966.58	3730.46	5147.7	6689.57	5516.93	2872.14	5721.34	2451.93	4806.6	4941.13	2400.27	3116.28	2824.23	3269.27	4243.16	4262.02	4332.34
GRMZM2G021706	chr10	14642866	14645735	304.3	305.545	236.199	481.323	277.415	248.472	289.606	223.462	293.739	295.844	195.764	292.996	243.39	314.977	345.253	272.8	534.997	326.034	360.635	376.275	524.093
GRMZM2G083470	chr6	154351742	154354254	137.843	131.78	102.413	103.867	4.8064	120.269	176.078	82.9368	161.264	83.547	159.46	57.273	103.119	114.741	108.452	107.633	132.685	93.6683	101.032	65.2002	103.591
AC233900.1_FG002	chr3	99964437	99971258	0	1.13145	0	9.82859	0	0	0	3.97642	0	3.12564	0	0	4.93145	5.10335	4.17568	6.03652	7.3	0	1.46315	4.15632	1.33015
GRMZM2G324478	chr9	146470771	146471437	82.0753	139.367	130.412	104.128	96.0876	109.623	121.042	116.062	141.203	67.1969	144.136	49.0748	74.8294	140.243	123.234	114.288	122.613	79.3131	191.905	73.3907	82.2414
GRMZM2G456578	chr1	101770896	101771893	4.94768	2.81279	3.08977	2.89784	4.44561	2.35028	3.71427	3.43211	2.45149	0	3.32924	0	0	5.25315	4.10983	2.66372	6.2846	3.33984	6.1438	0	4.33982
GRMZM2G067096	chr2	110086900	110089554	0.143582	0.245174	10.9593	10.6919	0	4.10435	0	2.22742	12.9156	0	0.249779	0	25.523	6.97692	0.751168	14.7895	1.36412	0.272641	0.753985	0	2.79377
GRMZM2G132623	chr1	187641039	187642585	1198.23	2068.52	1755.81	1631.04	1649.25	2083.93	1502.01	1630.53	1299.72	1789.22	1167.09	1471.44	944.022	1829.28	1289.74	1886.76	1576.37	1594.01	1650.02	1617.57	2019.9
GRMZM2G021433	chr1	48419489	48421030	0	13.1833	10.8369	5.51828	0	0	0	6.1768	5.71735	0	0	22.4064	0	0	8.28219	0	0	21.2307	7.78701	0	16.1864
GRMZM2G072488	chr7	127262844	127268493	0	0	0	0	0	0	0	0	0	0	0	0	0	0	0	0	0	0	0	0	0
GRMZM2G162672	chr6	140290310	140311511	864.963	872.038	683.562	803.222	609.842	928.383	1141.64	834.603	784.316	807.982	977.495	692.693	906.158	1021.72	768.13	678.584	804.815	571.205	776.698	879.086	980.589
GRMZM2G049041	chr1	38249829	38252655	39.8668	48.693	43.5774	43.8467	23.2453	41.1497	35.2839	38.7227	35.5915	40.4453	33.8418	58.7752	30.7078	15.6517	28.1074	36.4817	43.8189	26.2781	40.5849	31.5911	32.8254
GRMZM2G146004	chr8	5186350	5187295	1413.52	0	928.013	144.293	0	446.532	0	950.36	268.368	0	1553.15	983.423	56.5067	393.348	349.084	138.145	0	1021.53	0	0	2.53279
GRMZM2G169087	chr2	211770682	211773832	108.158	161.72	120.312	137.807	129.48	159.159	148.677	108.682	112.129	96.4217	148.583	87.3882	230.056	145.604	107.276	150.608	141.036	100.902	130.409	42.9634	144.378
GRMZM2G703059	chr2	63034927	63035150	0	0	0	0	0	0	0	0	0	0	0	0	0	0	0	0	0	0	0	0	0
GRMZM2G037265	chr1	183557957	183561991	113.752	381.301	100.095	67.2524	49.8184	66.6152	36.8097	106.25	44.6188	34.0234	98.7041	30.4361	34.1231	80.2005	52.5735	44.8076	64.2822	225.303	145.011	28.6869	433.433
GRMZM2G053914	chr3	94381830	94383168	0	0	0	0	0	0	0	0	0	0	0	0	0	0	0	0	0	0	0	0	0
GRMZM2G017533	chr4	35625232	35628367	0	2.45065	0	3.2981	0	3.26238	0	2.74628	0	0	4.01248	0	0	0	2.94177	0	5.06133	0	0	0	3.41291
GRMZM2G002993	chr3	122512723	122514709	57.5033	38.839	35.6482	56.4799	26.6673	44.9804	53.9795	34.0054	48.3124	32.4807	44.969	32.8464	39.335	46.939	47.7665	67.9588	42.2417	26.2187	50.1104	24.4397	28.537
GRMZM2G300995	chr10	14519858	14520455	0	0	0	0	0	0	0	10.8937	0	0	0	0	0	0	0	8.4653	0	0	0	0	0
GRMZM5G809243	chr1	281661563	281661809	0	0	0	0	0	0	0	0	0	0	0	0	0	0	0	0	0	0	0	0	0
GRMZM2G170167	chr8	90669157	90669705	30.56	52.5274	21.5604	27.695	21.9168	6.80597	0	30.4526	13.6933	18.3372	25.0134	17.756	29.2349	11.2096	23.796	28.1785	26.7599	21.3297	39.0495	24.9672	30.1672
GRMZM2G455769	chr1	296189255	296190800	10.4321	25.0903	15.481	14.2184	9.10745	17.9511	12.3408	15.2265	11.4296	10.2691	11.5685	13.8711	7.96975	5.8363	11.4031	18.0318	12.4069	11.0626	24.2723	9.66483	20.5464
GRMZM2G076985	chr5	41826253	41830426	118.815	176.706	156.378	172.009	128.046	136.371	115.081	182.301	126.103	134.371	134.917	98.2909	117.358	124.973	120.547	128.144	104.152	143.093	117.845	135.849	117.863
GRMZM2G181354	chr4	175728795	175731387	0	0	29.2742	67.0008	0	0	43.6805	3.13732	0	36.94	36.5187	21.0726	0	34.0768	56.9758	30.6556	41.1487	69.4714	45.3613	17.6857	37.1309
GRMZM2G065394	chr9	102104017	102106484	27.9	90.4288	51.9505	72.3971	18.6948	35.802	32.0373	27.4366	34.2446	3.75046	57.2183	30.6319	34.7799	27.215	25.2842	35.551	20.0728	25.0276	40.0892	25.7409	25.1714
GRMZM2G404767	chr5	175635988	175639304	0	0	1.81646	5.8699	0	2.69196	9.75939	3.36311	4.9841	0	4.97275	0	0	3.97252	3.96257	4.94633	0	0	5.28963	0	2.15464
AC211347.4_FG006	chr2	150091406	150092649	0	0	0	0	0	0	0	0	0	0	0	0	0	0	0	0	0	0	0	0	0
GRMZM2G098290	chr10	146465613	146471079	1283.24	1444.66	1150.99	1486.07	952.365	1507.01	1692.59	1550.48	1118.57	1277.84	1960.97	641.416	903.136	1328.51	1386.59	1389.05	1570.58	946.24	1391.35	1161.74	1146.51
GRMZM2G463730	chr1	283318342	283325234	36.4706	44.7677	40.7862	44.9112	39.5811	36.4151	49.6681	47.5722	46.586	45.2058	49.1039	35.3946	34.1964	43.5417	45.7599	47.1415	53.934	38.7166	53.2592	47.4113	53.9572
GRMZM2G129150	chr5	13720016	13722308	24.2964	45.3034	41.172	45.9864	101.846	76.3607	54.6604	51.1187	32.9735	70.0406	41.3464	83.2303	48.6119	46.1744	75.5627	78.6936	62.0718	66.0466	49.583	72.8722	88.9
AC214635.3_FG006	chr4	124478316	124478574	57.7334	33.6156	61.8335	62.325	44.1722	54.0096	31.095	58.7321	33.3839	93.3545	56.0758	56.3519	0	41.826	0	132.325	59.2058	0	96.1218	64.6493	36.7884
GRMZM2G077068	chr1	221236142	221241717	46.9054	60.5104	44.9076	30.3693	18.9116	56.4044	34.9953	35.3507	8.43758	66.4495	29.7443	0	18.0799	41.4715	28.4965	20.9146	30.2535	17.0322	64.5614	58.1741	65.5242
GRMZM2G009214	chr4	41890328	41895319	13.7163	18.8164	16.3881	18.2103	17.8608	20.812	16.3207	22.978	20.9561	21.5381	18.1722	15.509	10.967	13.5538	26.0011	16.641	21.5965	16.9503	18.6759	19.7532	18.3338
GRMZM5G861300	chr3	212966723	212985792	185.092	136.342	117.807	198.145	179.87	234.106	212.678	203.769	189.394	255.925	220.266	213.469	169.819	212.268	188.556	169.35	172.302	112.478	201.223	245.463	210.939
GRMZM2G318592	chr6	95632251	95634165	22.4479	14.5942	2.87718	9.16589	8.7221	11.3806	0	8.14757	0	0	6.05451	23.8015	0	3.72265	3.48797	4.33645	10.4248	12.1353	0	0	0
GRMZM2G063188	chr4	68236841	68247498	65.5699	66.3811	55.711	65.7569	35.6613	60.4378	59.2873	60.5063	45.6357	61.5185	75.8589	66.4169	54.3838	43.0386	52.7904	66.1987	69.7938	43.1467	46.5747	59.2627	58.7112
GRMZM2G082222	chr4	169958196	169961065	328.318	400.497	443.499	377.011	398.171	491.355	287.563	357.091	337.589	431.21	365.349	337.436	438.852	338.54	319.825	421.696	476.277	394.456	329.644	388.343	390.966
GRMZM5G826654	chr1	221185561	221186055	0	0	0	0	0	0	0	0	0	0	0	0	0	0	0	0	0	0	0	0	0
GRMZM2G106673	chr4	26492261	26499952	82.7578	46.5953	90.4797	109.409	40.2708	53.0703	54.6521	67.0884	10.3575	133.188	87.6143	63.4189	57.4014	19.9795	31.8619	68.7357	114.119	59.2637	68.1647	123.262	125.597
GRMZM2G511451	chr4	217464193	217464874	0	0	0	0	0	0	0	0	0	0	0	0	0	0	0	0	0	0	0	0	0
GRMZM2G107756	chr6	75101748	75103911	35.4705	79.862	43.2667	35.1285	18.5904	71.4872	71.5262	62.5722	56.3982	30.0236	67.1391	68.667	65.0162	76.228	49.0228	29.6478	60.0721	66.8506	53.4318	39.7392	64.0633
GRMZM2G012980	chr5	42227538	42228321	0	0	0	0	0	0	0	0	0	0	0	0	0	0	0	0	0	0	0	0	0
GRMZM2G149556	chr2	12684059	12686676	661.789	595.455	611.344	844.402	393.417	675.121	722.14	606.832	560.883	796.538	659.623	944.111	859.277	1076.73	835.554	471.162	841.424	632.201	926.742	459.931	735.493
GRMZM2G092817	chr8	165272947	165276224	191.908	243.18	237.315	129.435	76.4177	112.127	132.106	161.055	141.735	157.033	10.2432	152.441	104.29	119.817	139.171	191.83	137.893	174.192	151.089	166.24	232.84
GRMZM2G174427	chr10	30655248	30659493	52.7471	39.4049	69.1986	78.7789	29.7834	48.3393	56.1847	79.4884	81.1571	58.8865	67.3847	55.7797	43.3322	123.298	63.2748	73.4513	65.8203	82.1745	77.9482	60.5786	91.268
GRMZM2G154789	chr5	157496747	157497564	278.634	262.898	315.908	228.808	36.2941	68.9113	124.884	345.916	65.8455	66.6395	88.0778	456.932	247.399	155.221	124.053	178.32	100.506	147.731	161.09	349.611	616.691
GRMZM5G871345	chr5	131127125	131127487	0	0	0	0	0	0	0	0	0	0	0	0	0	0	0	0	0	0	0	0	0
GRMZM2G374629	chr4	214505664	214507950	21.3101	19.7444	19.8476	23.5847	27.8841	16.5674	20.5345	19.5367	24.2402	24.0779	13.8179	14.7712	21.626	17.6	27.471	14.4182	19.8772	24.0989	23.4298	18.2584	29.5988
GRMZM2G159547	chr5	208349355	208350976	62.728	57.4771	51.5375	28.4556	60.7861	73.5419	33.5104	48.5702	36.336	39.6992	40.1433	47.838	42.752	56.025	65.1764	61.8503	85.1906	56.5796	53.7654	49.9336	69.469
AC209208.3_FG003	chr5	193299130	193301682	0	2.19385	2.52995	2.13021	0	5.7298	4.87516	2.81023	0	4.23835	0	0	0	1.71444	1.7029	0	0	0	0	0	2.6209
GRMZM2G565911	chr10	35920772	35922350	13.3892	59.138	41.9658	43.36	182.535	195.212	130.872	89.5107	161.667	157.642	39.4543	86.5766	54.8007	127.914	163.778	111.792	58.5096	168.415	61.1293	124.47	87.1307
GRMZM2G144483	chr8	96052258	96055322	709.761	369.465	562.247	587.331	201.381	314.807	554.843	658.043	555.598	537.145	895.146	375.518	357.224	382.816	215.693	509.287	593.789	114.851	394.021	601.652	444.94
GRMZM2G079625	chr3	18010869	18014247	73.3726	80.0258	65.9867	72.9088	72.5399	78.044	71.5853	64.3142	69.7359	63.4631	77.6497	62.8642	81.6235	56.1843	73.6426	72.3603	68.4761	74.7071	60.027	75.8844	82.5262
GRMZM2G170851	chr1	287470584	287473096	0	11.6694	11.5245	11.8215	11.8179	14.3578	0	13.6613	10.6661	10.0868	8.10347	0	13.9272	10.6416	7.22692	14.8028	14.2842	10.5973	12.2055	0	7.71851
GRMZM2G088365	chr4	5078342	5079419	0	0	0	0	0	0	0	0	0	0	0	0	0	0	0	0	0	0	0	0	0
GRMZM2G164064	chr2	130147590	130148452	280.822	142.64	136.064	220.511	132.38	348.051	135.145	111.858	179.425	195.114	86.3903	167.341	165.746	29.2909	125.289	412.928	362.317	125.293	212.906	309.244	143.212
GRMZM2G162154	chr1	270889817	270890868	60.8968	51.6185	37.604	50.7107	45.326	42.4207	68.9511	43.4078	41.5474	97.8705	87.5025	72.8492	35.6047	45.292	46.9985	54.9612	89.4927	50.5932	51.5599	59.0182	58.292
GRMZM2G376760	chr6	73397029	73400490	1.14588	0.583456	0.62718	0.34643	0	0.96426	0	0.565373	0.398902	0	0.19111	0.1838	0	0.246673	0.444643	0.0936525	0.46346	0.399783	0.217745	0.803072	0.274198
GRMZM2G421829	chr8	164083361	164092361	112.6	107.027	101.332	135.678	102.87	116.34	91.3364	144.18	113.887	102.788	105.653	97.7263	96.6729	104.013	107.515	115.435	121.335	92.7458	131.763	121.439	109.425
GRMZM2G044659	chr4	6781545	6782383	0	0	0	0	0	0	0	0	0	0	0	0	0	0	0	0	0	0	0	0	0
GRMZM2G086502	chr7	29528765	29530595	0	0	0	0	0	0	0	0	0	0	0	0	0	0	0	0	0	0	0	0	0
GRMZM2G029486	chr2	171224088	171227788	70.3966	95.66	73.8788	89.1333	94.0553	58.4081	40.3146	117.792	83.3292	89.0996	103.876	60.9407	71.6851	102.526	87.8034	92.4212	94.1997	96.4795	91.984	58.7557	103.801
GRMZM2G403977	chr9	104294458	104344685	0	0	0	0	0	0	0	0	0	0	0	0	0	0	0	0	0	0	0	0	0
GRMZM2G412604	chr5	158684737	158689453	437.512	404.348	278.094	192.283	145.081	324.367	170.558	95.8885	131.599	207.546	189.962	244.087	197.097	215.149	133.18	403.976	98.9627	99.8877	291.256	163.951	83.9386
GRMZM2G388253	chr7	76540624	76544739	116.898	108.211	90.3669	134.456	113.245	130.358	110.463	124.163	124.093	98.054	143.112	126.577	120.13	153.891	123.918	145.501	105.394	132.707	95.7159	95.6085	124.708
AC199517.4_FG006	chr3	51038247	51038988	0	0	0	0	0	0	0	0	0	0	0	0	0	0	0	0	0	0	0	0	0
GRMZM2G121066	chr3	23781952	23788013	22.1077	25.8651	19.0426	22.6031	12.2272	20.3129	13.1861	16.5951	14.4436	16.3781	8.51338	12.0492	21.51	21.3073	20.745	22.4578	17.6269	12.5305	14.8363	17.812	19.985
GRMZM2G107985	chr8	155014819	155024270	23.3582	33.9403	21.2562	20.6745	43.1925	20.3528	29.112	27.2936	40.4755	27.9153	33.4245	27.0963	27.2671	15.7389	36.7188	41.3041	14.4458	27.3167	22.029	24.8197	29.306
GRMZM2G089288	chr7	8901781	8904176	8.57745	5.4518	0	14.0312	12.1674	0	14.0109	15.6374	9.56397	9.72988	6.20096	14.1012	14.0347	0	14.9881	19.3667	14.746	0	0	0	7.56948
GRMZM2G176340	chr4	159977928	159981488	77.6416	65.9709	74.0612	80.4609	63.4833	82.9383	87.736	78.9439	68.9022	62.9083	73.8493	68.9934	69.1912	74.6249	73.5906	67.4745	80.2151	62.7789	73.946	70.8599	73.4827
GRMZM2G012102	chr1	16177025	16178797	86.4545	162.332	238.444	224.027	226.302	224.872	215.219	114.608	247.479	78.6119	174.522	100.079	137.414	205.178	139.675	157.829	174.32	267.129	247.315	146.319	218.138
GRMZM2G156857	chr8	79003714	79004902	0	13.7824	14.0952	11.9904	0	3.77079	0	10.1422	5.46064	10.1083	6.62924	0	0	9.02154	1.90489	0	17.9942	12.5403	12.53	0	9.01991
AC190491.1_FG002	chr3	11972847	11974072	0	0	0	0	0	0	0	0	0	0	0	0	0	0	0	0	0	0	0	0	0
GRMZM2G175444	chr3	201463788	201464701	0	0	0	0	0	0	0	0	4.83488	0	0	0	0	0	3.06111	0	0	0	0	0	4.05033
GRMZM2G347146	chr3	150720893	150721526	0	14.6135	0	7.66844	0	0	0	0	0	0	0	0	0	0	0	0	0	0	3.00812	0	10.8564
GRMZM2G511859	chr2	3420866	3421201	0	0	0	0	0	0	0	0	0	0	0	0	0	0	0	0	0	0	0	0	0
AC196978.5_FG007	chr10	4516273	4517728	0	1.61766	1.69111	0.978828	0	1.26331	9.94821	1.86459	5.43061	5.36287	0	2.40408	0	1.71707	0.939481	4.95006	1.9501	0	1.52446	7.87963	5.69027
GRMZM2G119970	chr6	142202512	142204759	7.99075	3.84046	13.9622	6.48531	9.49056	10.4543	4.88323	8.14535	5.68589	8.14339	4.37103	0	0	9.78852	5.60211	8.51865	9.70202	19.0661	10.0465	0	9.13762
GRMZM2G325575	chr4	183588189	183591209	579.294	526.898	321.696	268.808	399.334	348.769	355.782	447.832	282.201	434.452	509.985	232.416	396.371	428.733	297.082	214.74	403.815	317.35	412.442	374.061	558.219
GRMZM2G373011	chr3	63823677	63824026	0	109.328	28.7008	40.2645	42.6687	48.1365	84.747	28.8546	93.7082	60.1401	73.2551	34.3732	64.9185	77.7105	45.9052	20.8857	63.044	91.0733	87.3985	115.671	93.6155
AC197757.3_FG002	chr4	25341926	25342184	0	0	0	0	0	0	0	0	0	0	0	0	0	0	0	0	0	0	0	0	0
GRMZM2G458650	chr8	137118331	137121252	16.9851	20.1399	9.41483	13.2532	16.3803	13.5612	0	12.2564	4.84117	0	14.6533	0	15.8271	8.45745	6.97701	12.7881	0	28.9853	0	22.7969	17.2771
GRMZM2G115775	chr4	66615285	66619252	295.991	306.302	423.929	345.594	458.578	338.422	334.685	322.426	397.534	268.679	248.059	350.929	290.487	326.866	254.938	404.255	265.313	386.769	329.25	379.145	384.444
GRMZM2G157202	chr5	11962858	11963981	0	0	0	0	0	0	0	0	0	0	0	0	0	0	0	0	0	0	0	0	0
GRMZM5G810231	chr7	2738044	2739244	6.13276	7.60321	18.7507	10.3039	0	9.13919	9.31212	23.7753	8.26508	0	12.5861	25.1987	17.0395	4.3683	10.025	15.2946	12.2433	11.8159	12.6528	0	18.4668
GRMZM2G137593	chr6	111665044	111676475	62.5454	49.3041	43.6857	49.1733	51.2016	60.8903	68.8578	64.9921	50.0649	56.736	71.6334	67.7014	44.7804	62.4172	45.4538	54.7764	60.3121	62.1996	70.0721	65.0567	63.9203
GRMZM2G050984	chr1	78701398	78707799	156.913	122.251	118.827	130.937	150.101	114.092	163.726	152.76	145.7	169.088	167.355	174.194	130.929	167.061	130.831	170.33	139.42	186.974	152.14	180.796	181.863
GRMZM5G850924	chr8	123253291	123254623	0	3.27461	0.992786	2.4338	0	3.35452	0	2.26382	0	0	2.93448	0	0	1.04484	0	1.38229	1.67262	4.66072	1.94605	4.16973	8.17547
GRMZM2G104045	chr3	123146656	123151680	51.3184	62.7689	39.04	41.0977	41.5669	45.7969	57.7877	49.2846	51.9792	51.8738	59.9797	50.3218	40.0408	47.8253	43.6927	52.8875	44.689	31.2883	60.8881	58.3285	62.764
GRMZM5G890976	chr2	149201270	149203065	16.7617	19.0051	0	14.5593	16.281	9.15724	12.4362	14.5534	11.8445	48.5779	27.7367	17.1101	0	6.06486	12.5427	26.4702	35.9193	0	13.1293	0	13.7152
GRMZM2G412702	chr5	63701132	63707323	0	0	0	0	0	0	0	0	0	0	0	0	0	0	0	0	0	0	0	0	0
GRMZM2G000710	chr10	95604484	95620161	156.992	274.302	196.869	169.069	194.558	226.304	133.363	173.113	169.158	143.209	160.736	152.184	171.327	226.678	147.512	210.002	149.939	171.689	147.552	149.167	158.893
GRMZM2G048494	chr2	235795254	235801595	165.856	168.403	145.14	167.815	172.599	170.105	161.331	197.396	163.168	163.137	168.433	148.297	174.515	189.788	154.325	189.377	180.527	142.514	173.151	138.715	190.535
GRMZM2G160527	chr2	1564791	1568723	54.506	50.4804	55.4937	51.2343	44.3094	50.8712	64.7915	66.3798	52.7181	60.9673	76.1687	75.2936	60.3949	62.5995	42.5305	62.7779	58.0923	40.2031	57.5699	78.442	58.5785
GRMZM2G082801	chr3	77595731	77598556	0	0	0	0.914022	0	0	0	0	0	1.33989	0	0	0	0	0	0	0	3.70826	0	0	0
GRMZM2G702848	chr4	229989555	229989902	0	0	0	0	0	0	0	0	0	0	0	0	0	0	0	0	0	0	0	0	0
GRMZM2G041527	chr7	174321700	174327269	8.11101	13.9416	11.3324	14.3384	17.2215	12.2104	13.8859	18.7123	12.4118	14.8061	15.7007	12.9248	14.0507	12.2485	12.564	13.6741	53.4919	34.8842	11.7673	11.7208	13.6939
AC187789.3_FG001	chr9	30446553	30446811	0	0	0	0	0	0	0	0	0	0	0	0	0	0	0	0	0	0	0	0	0
GRMZM2G128935	chr7	137161964	137163904	67.0991	67.7162	63.1708	98.6827	52.7402	65.5992	0	50.7427	91.6142	33.6947	60.2415	31.9938	85.519	149.978	56.7535	77.0486	39.1939	98.37	114.019	70.7007	74.2565
GRMZM2G165290	chr5	187468986	187470833	101.335	76.0622	95.6918	89.9792	79.2336	95.44	74.2047	97.7717	101.889	81.5801	71.242	102.66	89.1714	63.7529	78.1945	95.2139	78.8222	59.5924	56.6831	111.377	80.7159
GRMZM2G034697	chr4	136957523	136960789	60.1262	68.7357	62.429	73.1125	73.8342	52.418	57.673	38.5037	85.6887	52.4756	53.0843	58.6026	45.2521	89.2296	55.4688	58.8739	55.537	75.2575	42.5918	71.5215	66.7896
GRMZM2G010306	chr3	197386890	197392522	30.5178	35.2071	28.7076	35.7982	22.6665	27.3229	27.1663	33.6694	33.5767	26.7178	22.71	31.143	31.5366	25.9822	32.3381	30.1449	31.2667	19.2638	28.1114	27.5695	33.455
GRMZM2G328265	chr8	168155156	168157754	9.07352	8.46651	11.7977	7.29246	16.9652	10.7053	18.7597	14.909	15.5917	14.8139	8.63147	5.86292	5.15542	10.4303	14.9643	12.6644	8.99246	12.9075	12.5362	10.0464	12.9126
GRMZM5G860214	chr5	168446536	168448151	40.6106	49.536	32.6869	10.6052	0	32.8307	16.0768	12.3532	25.6545	18.616	49.1205	30.7067	0	20.2854	17.6759	32.5195	26.4368	60.4779	46.893	20.3801	19.9762
GRMZM2G004330	chr8	146472575	146475949	0	1.26879	1.25098	1.06807	0	0	0	0	0	0	1.12905	0	0	0	0.866665	0	0	0	0.928911	0	0.958924
GRMZM2G019810	chr3	41447956	41454770	18.8071	10.4859	18.6586	24.5174	7.90886	41.2863	0	9.09631	59.9384	7.77092	6.15002	20.2481	22.6985	14.5281	15.1141	19.8119	8.65715	8.75266	7.18932	0	12.611
GRMZM5G851140	chr10	9986481	9991453	0	0.291152	0	0	0	0	0	0	0	0	0	0	0	1.53363	0	1.20702	0	0	0	0	0.773698
GRMZM2G375302	chr4	113441002	113445746	0	3.14062	0	1.37131	0.777823	0.1237	0	0.0781848	0	1.33595	0	0	4.11536	0	0.690591	0.921175	0	0	0.05571	0.489287	0
GRMZM2G136624	chr2	62723401	62785784	12.7526	31.6035	23.387	13.1714	20.3425	34.0321	40.8178	16.7724	0	0	17.3127	0	20.7132	15.1546	27.8578	24.4242	24.2087	12.3484	24.2001	6.606	1.60937
GRMZM2G165511	chr3	185306160	185310608	672.848	884.845	717.131	664.605	695.347	787.742	588.602	795.364	774.864	625.564	668.507	493.423	657.488	1009.39	526.665	806.458	630.701	698.408	690.552	663.635	889.641
GRMZM2G007053	chr3	170426094	170427357	19.1615	18.1981	29.2996	0	0	29.9137	0	26.9483	44.4271	23.6834	34.683	25.1076	9.16148	0	10.2995	34.1895	17.8774	26.1818	37.6539	9.25809	0
GRMZM2G156585	chr5	190684155	190686510	5.78944	6.82928	4.63096	3.9655	5.31802	3.41296	5.10258	4.48573	4.21612	3.57998	4.69861	5.59699	3.47154	4.25968	3.1692	7.02084	6.69666	4.24958	4.26066	6.29795	5.66446
GRMZM2G077088	chr5	6440488	6442663	185.212	150.567	149.4	270.712	110.69	203.192	313.064	223.52	179.969	179.385	224.746	205.089	116.339	144.947	248.838	144.42	143.651	154.262	225.863	180.872	241.591
GRMZM2G154059	chr4	239219197	239221174	9.21287	8.48631	6.43722	7.61973	8.15156	10.5064	9.82368	6.4663	8.35113	8.78935	7.72822	11.1757	7.45005	5.92676	8.32177	9.64598	7.52062	7.55949	8.0122	12.7283	8.27538
GRMZM2G362410	chr6	117073011	117074450	0	5.37302	8.6645	0	0	8.73238	0	6.96941	0	7.76024	0	0	0	0	5.54483	5.02227	0	7.05367	6.02797	0	2.48724
GRMZM5G803490	chr2	24363169	24366723	241.136	113.317	267.947	251.757	300.312	272.703	326.212	313.206	276.535	272.399	268.707	192.519	288.151	319.777	294.862	255.645	260.788	254.291	258.296	301.057	290.859
GRMZM2G027962	chr6	130459470	130460163	18.1278	164.977	45.8064	90.2592	0	0.893163	103.734	84.4691	0	82.2341	249.324	128.467	0	0	75.3299	140.573	134.973	133.644	96.2605	376.553	0
GRMZM2G064023	chr4	233821046	233828196	137.145	154.526	150.795	161.355	182.046	267.603	118.983	155.601	193.622	163.618	150.375	136.281	138.32	168.935	145.613	156.816	172.34	140.361	135.527	168.671	145.214
AC185648.3_FG007	chr4	174540174	174542764	0	0	0	0	0	0	0	0	0	0	0	0	0	0	0	0	0	0	0	0	0
GRMZM2G042599	chr2	3942179	3945882	14.9274	17.9391	16.4132	20.7091	11.5671	11.5047	0	20.1867	14.4424	10.242	10.2084	11.0873	16.6231	10.577	13.6921	9.27071	6.84825	10.6674	10.7041	23.5163	15.9607
GRMZM2G076946	chr3	136563026	136566806	227.932	245.548	165.389	465.732	114.108	146.191	219.977	244.61	293.584	264.693	104.158	338.635	118.592	116.685	312.805	204.43	102.765	185.53	277.638	128.112	355.016
GRMZM2G117574	chr6	165103745	165105169	11.6465	20.1584	11.1687	13.0185	11.4348	12.8486	10.7012	21.7806	7.61076	14.087	12.8942	16.1972	11.3567	14.1381	11.4576	13.7441	13.8845	17.325	17.4114	11.7527	15.9151
GRMZM2G096115	chr8	123145418	123147501	0	3.03339	1.62381	2.75438	5.89241	2.25661	5.56346	4.33754	7.76654	11.1474	9.88562	4.42598	0	2.29679	4.93432	0	8.56509	15.4737	9.4564	6.12651	5.62453
GRMZM2G300163	chr9	120253826	120254697	0	0	0	0	0	0	0	0	0	0	0	0	0	0	6.50143	0	0	0	0	0	0
GRMZM2G331861	chr10	110087490	110095067	2.58868	2.27431	0.388556	0.318044	0.416794	0.733962	2.08794	3.87679	3.14066	0.0807754	6.94878	0.430343	3.4198	1.07653	4.42325	0.71526	3.57579	0.103894	0.59596	0.634504	1.1398
GRMZM5G869321	chr5	72579881	72580307	0	0	0	0	0	0	0	0	0	0	0	60.3174	0	0	0	0	0	0	0	0	0
GRMZM2G093574	chr6	136910574	136913807	434.101	1107.63	1131.66	795.506	901.142	905.543	323.927	1135.99	656.567	403.867	369.459	272.37	966.024	916.819	466.814	769.362	339.743	565.425	454.411	360.505	808.988
GRMZM5G898939	chr5	209218088	209218304	0	0	0	0	0	0	0	0	0	0	0	0	0	0	0	0	0	0	0	0	0
GRMZM2G103490	chr9	139614345	139617289	163.224	173.345	172.964	185.502	167.723	176.433	135.478	175.699	169.976	160.125	145.905	141.719	163.58	169.505	155.606	157.076	137.893	164.508	175.115	155.214	179.685
GRMZM5G892973	chr1	257072870	257077491	0	0	46.5331	0	1.71884	4.52345	4.22133	2.25097	0	0	84.848	0	0	0	0	3.94691	2.72435	0	0	0	5.72061
GRMZM2G135300	chr9	103172884	103181563	60.9761	53.1285	57.8525	62.0855	51.7096	76.9402	63.0026	70.2615	52.8196	68.7425	47.052	57.8389	65.21	54.1963	61.3923	71.9733	46.4435	55.8452	52.6163	44.3557	64.684
GRMZM2G365188	chr2	3564743	3566656	0	0	0	0	0	0	0	0	0	0	0	0	0	0	0	0	0	0	0	0	1.60039
GRMZM2G061879	chr10	93396307	93397659	0	0	0	16.8145	0	32.1968	17.4916	0	11.1089	0	0	0	18.0904	0	3.05723	0	0	0	0	0	6.34017
GRMZM2G176881	chr2	26439250	26443091	91.4333	114.528	108.674	134.8	109.122	151.855	105.158	126.575	125.434	115.085	136.982	114.077	118.111	110.505	122.095	116.331	127.057	124.692	124.85	88.2081	130.273
GRMZM2G153803	chr4	62551565	62552331	0	0	0	0	0	0	0	0	0	0	0	0	0	0	0	0	0	0	0	0	0
GRMZM2G128358	chr5	212784243	212786195	120.435	171.611	145.703	100.16	125.921	123.705	191.595	181.599	201.348	160.173	166.863	158.259	152.001	158.92	130.919	119.759	163.747	92.579	141.141	158.155	149.639
GRMZM2G158191	chr2	200745769	200752546	11.2348	5.06912	12.1452	16.7941	28.1514	10.7269	13.2519	5.36664	20.588	10.4962	13.3014	0	0	10.216	21.298	0	12.4249	13.4103	4.51267	18.1231	17.6753
GRMZM2G463904	chr5	211752227	211765196	79.3594	126.44	66.2599	111.451	101.062	83.0638	67.0316	101.029	177.897	74.3992	80.0112	52.9012	113.363	78.1803	108.87	103.639	56.2711	104.632	83.7297	76.0298	72.4135
GRMZM2G375762	chr5	205032154	205034355	27.8269	13.6669	12.9407	21.3679	0	14.7948	19.7133	30.6983	12.5166	37.4573	30.9349	17.8308	0	17.3323	14.131	25.7109	31.7909	12.6484	25.3481	21.9779	23.2611
GRMZM2G066020	chr7	142586145	142590786	0	0.639962	0	1.37501	0	0.883197	0	2.16965	0.764909	0	0	0	0	0	0.38023	0.893185	0	0	1.15227	0	0
GRMZM2G392224	chr10	119980972	119981296	0	0	0	0	0	0	0	0	0	0	0	0	0	0	0	0	0	0	0	0	0
GRMZM2G062591	chr4	37320822	37324762	109.609	77.8765	77.156	75.5246	58.8665	68.5017	72.3759	67.4088	55.848	63.398	93.0876	100.169	46.6372	69.1707	91.6828	83.2853	82.9312	70.617	60.193	82.7956	94.2794
GRMZM2G178741	chr9	151259538	151261929	42.8368	30.6581	36.344	32.2829	27.9752	44.3293	46.3348	74.7611	41.4843	51.9887	36.5871	79.5766	20.956	58.8145	28.2256	23.7577	43.0151	37.7399	34.7703	99.3305	33.634
GRMZM2G124553	chr8	38807127	38808358	48.4595	56.8927	69.021	52.7397	42.8895	57.8932	46.6604	30.6921	42.924	61.864	31.6663	40.8965	73.6097	63.6522	61.0435	54.3706	49.653	54.9967	52.5466	44.2302	54.1073
GRMZM2G040803	chr10	132511509	132515292	74.1226	78.3025	65.6646	83.4575	87.0872	82.7684	63.0454	83.6927	69.8091	116.865	98.4305	70.4789	53.8349	69.1231	76.0074	62.2406	97.3753	89.8687	80.7635	67.5098	62.2117
GRMZM5G870067	chr2	43834733	43836570	0	2.97016	0	3.21012	0	0	0	2.75353	4.36632	0	0	0	0	2.26156	0	0	4.63954	0	3.25679	0	0
GRMZM2G118809	chr1	278837829	278839720	11.6	11.081	15.6514	22.773	142.382	6.85431	10.7263	12.5217	6.38029	16.2657	58.2977	57.5921	77.9384	17.1055	21.0342	51.7541	45.6109	8.76214	37.8377	6.9959	14.0916
GRMZM2G106412	chr5	178320732	178325109	97.6786	127.219	130.734	151.414	128.73	115.018	98.2352	119.494	115.213	75.3639	107.937	110.272	144.851	97.1972	137.829	162.652	120.709	121.194	150.54	107.012	120.217
GRMZM2G701367	chr3	19011694	19012988	0	0	0	0	0	0	0	0	0	0	0	0	0	0	0	0	0	0	0	0	0
GRMZM2G098088	chr3	21857926	21862117	16.2109	24.0227	16.3026	37.0829	20.1513	23.0387	21.1306	25.6305	24.63	22.4089	30.5504	19.7797	27.7205	13.6152	14.1391	33.8023	22.2646	11.8972	22.3707	16.2319	39.5297
GRMZM5G863344	chr9	147620839	147623246	25.6981	53.016	37.2896	33.2738	72.0962	58.0099	52.2666	36.2135	62.5197	31.9336	54.4234	34.6831	53.5715	49.0906	78.207	46.009	36.1155	53.6131	50.5886	45.7676	41.8115
GRMZM2G066867	chr5	18448060	18451141	69.6475	79.7261	180.491	85.2461	212.652	77.6213	87.0928	93.0129	227.898	83.9496	145.346	123.176	87.2524	88.2794	243.845	75.4356	98.056	94.8426	83.6406	191.887	82.0662
GRMZM5G893284	chr10	122620359	122620578	0	0	0	0	0	0	0	0	0	0	0	0	0	0	11.1725	0	0	0	12.1781	0	12.9639
GRMZM2G012728	chr8	4258016	4259694	10.2435	4.61936	7.02655	6.92811	0	5.53611	13.2678	10.5551	6.77665	7.02838	7.37318	6.98284	7.05536	14.2024	3.95013	4.95007	2.91061	0	28.1769	0	10.8296
GRMZM2G079298	chr2	54956844	54958300	0	0	0.90646	1.28226	0	0	0	1.65233	1.75216	0	0	0	0	0	0.203557	0	0	0	1.23409	0	0
GRMZM2G126802	chr9	151704716	151705681	10.1647	4.51982	0	0	0	0	0	0	0	0	0	0	0	0	0	0	0	0	0	0	0
GRMZM2G164743	chr10	132010586	132030784	182.731	187.333	163.51	115.621	102.078	170.111	120.29	223.15	132.705	159.862	135.427	186.728	101.302	195.43	142.603	136.253	203.056	118.975	195.214	194.505	123.353
GRMZM2G028501	chr5	63633659	63636820	17.7326	22.8779	16.2726	23.6555	24.5249	21.0379	18.9523	26.0899	24.2025	21.406	16.686	19.3602	21.0757	22.8194	24.2724	19.3648	20.1729	26.0122	20.5076	18.644	26.5933
GRMZM2G130230	chr2	36456198	36464613	244.964	230.813	358.883	153.148	278.906	360.961	233.958	282.385	167.852	295.521	292.064	482.494	227.282	123.616	269.372	264.686	178.317	155.035	354.488	227.742	259.136
GRMZM2G062357	chr1	290113639	290121340	57.8521	132.828	113.47	135.876	80.4581	117.827	142.95	67.2136	124.441	82.8226	92.6297	133.367	141.73	109.062	92.6638	93.396	115.805	187.362	141.759	90.8881	136.246
GRMZM2G090824	chr7	988165	993667	107.585	113.601	106.167	110.775	108.39	100.715	104.4	130.287	114.582	97.6604	98.9719	90.3381	110.818	107.534	99.2127	91.1211	104.838	96.4753	111.525	104.112	101.324
GRMZM2G701730	chr5	97509130	97518211	3.96327	5.04574	3.98406	5.58788	5.09191	6.27457	3.42154	4.60719	5.48641	2.77284	3.20367	5.90368	4.34783	4.72009	3.9413	7.18205	3.18505	3.49735	5.47112	5.71667	5.28174
GRMZM2G125529	chr4	142201865	142205470	25.7652	23.5887	22.2112	34.9186	80.3387	28.4021	28.5961	27.9365	83.7556	26.9433	50.7307	19.5101	22.4002	58.9775	76.9412	36.2269	26.4183	54.7462	34.8593	27.1025	37.2182
GRMZM2G160556	chr8	98399981	98426190	87.2516	80.2092	85.7046	81.4035	79.6588	87.3394	86.0401	79.2748	92.3786	91.4991	78.2734	76.3477	90.3689	82.6205	83.4531	86.8413	70.9852	94.9999	86.3751	74.3419	87.1051
GRMZM2G065423	chr3	179409309	179413931	18.2545	17.6176	17.2939	14.5125	11.9251	13.431	7.49185	15.2623	17.9106	9.86185	10.5422	5.81411	11.538	15.2326	18.0917	14.6949	23.4624	12.7863	9.03398	6.8094	12.9417
GRMZM2G570006	chr8	18358201	18358696	0	0	0	0	0	0	0	0	0	0	0	0	0	0	0	0	0	0	0	0	0
GRMZM2G043383	chr7	2584957	2590700	281.099	284.988	297.983	340.746	250.015	412.258	272.392	355.118	428.296	317.215	232.26	287.522	304.754	375.429	252.667	277.726	237.469	265.956	259.384	352.697	294.214
GRMZM2G148404	chr10	6372732	6373839	18.0786	3.22749	12.6708	6.46045	0	5.21961	12.9385	11.3878	16.3472	6.66562	5.01879	11.9815	0	9.35136	10.9056	0	0	0	4.59282	0	4.07978
GRMZM2G035890	chr1	286240395	286242460	100.846	133.259	95.7411	99.2883	63.557	32.8649	45.9551	102.087	58.7841	199.824	445.881	133.709	45.9073	0	227.848	218.148	230.058	254.064	234.562	193.047	293.999
GRMZM5G871093	chr1	193164724	193165789	26.435	21.2204	13.7071	9.79213	22.6184	10.4936	20.2479	14.8851	12.4631	31.3552	23.3729	31.3776	12.3101	17.0622	13.1584	12.8878	22.1352	19.5795	15.2572	23.5826	25.6272
GRMZM2G174669	chr4	238371645	238377176	80.9735	70.9736	71.7639	58.5283	49.4886	44.1359	50.8419	58.616	36.6634	55.6834	91.8465	82.1729	71.0649	86.0235	35.2131	75.3095	82.6869	26.9397	78.353	78.526	79.697
GRMZM2G014729	chr7	166856423	166860909	0	0	0	0	0	0	0	0	0	0	0	0	0	0	0	0	0	0	0	0	0
GRMZM2G404126	chr3	207547849	207548812	25.9595	30.4016	29.6846	27.367	27.1303	21.3974	24.6446	21.1504	29.3749	31.1094	26.7813	22.8991	20.9577	14.9779	38.5758	23.7937	22.3183	19.8622	37.0682	32.4899	32.019
GRMZM2G059706	chr4	206497946	206499008	324.048	330.65	285.42	293.626	273.014	313.048	236.316	283.428	298.594	249.552	256.323	276.504	234.656	294.057	205.276	297.9	336.137	237.088	255.37	284.247	364.008
GRMZM2G137176	chr4	209542715	209544018	41.2104	44.5164	51.9231	8.12633	6.39033	15.2459	4.27296	8.15991	5.88668	35.4749	4.40684	25.0969	7.19182	20.6578	69.5401	12.0272	38.1369	54.5241	7.43112	26.111	8.03357
GRMZM2G163572	chr5	156367063	156377477	11.5259	11.943	10.2035	11.3873	11.1332	18.9151	23.2793	19.19	14.805	15.7379	16.2853	22.3554	10.2387	19.7596	16.4361	13.2022	20.7253	10.9796	18.9005	24.4504	21.9215
GRMZM2G066735	chr5	29894532	29895381	0.942074	1.34644	0.532459	1.89189	5.53305	0.491554	0	0.546218	0.912896	0.19801	1.7958	0	4.22519	1.9808	1.12784	1.81513	0.844877	0	1.30637	0.304583	0.519922
AC215201.3_FG008	chr6	142096808	142097933	0	0	9.53737	0	0	0	0	0	0	0	0	0	0	11.1288	9.70116	0	0	0	0	0	5.5908
GRMZM2G054634	chr9	113419984	113424715	26.9705	35.9433	33.7538	41.7559	28.1559	31.9966	29.3736	31.9953	38.3567	23.9869	25.3611	25.298	31.347	27.3681	44.5026	33.9737	25.0442	23.1417	31.5462	24.7792	31.13
AC217972.3_FG010	chr3	218164332	218164767	0	0	9.49224	0	0	0	0	0	0	0	0	0	0	0	0	0	0	0	0	0	2.68447
GRMZM5G843584	chr4	226361594	226363156	0	0	0	0	0	0	0	1.47758	0	0	0	0	0	0	0	0	0	0	0	0	1.88959
GRMZM2G310739	chr6	161111552	161116378	0	0	2.98305	0	0	0	0	0	0	0	0	0	0	0	0	0	0	0	0	0	5.4583
GRMZM2G180555	chr9	141371303	141381330	32.345	33.8148	39.993	41.312	39.6678	46.3571	45.3945	34.5808	56.4563	36.7292	34.6324	42.7488	41.7329	40.1923	37.2774	26.9473	36.1359	47.1906	37.6467	31.0053	39.3757
GRMZM2G038667	chr4	183656304	183662555	39.6964	43.6877	35.8425	45.4092	44.7785	41.3473	28.9204	45.6715	49.0811	41.338	40.6022	40.8643	39.4039	36.8839	42.3683	52.6262	42.4585	44.5237	48.0676	40.8864	43.765
GRMZM2G141940	chr5	6381677	6384789	19.3005	24.5796	24.6434	17.4473	19.5225	28.0547	27.043	25.4839	44.9704	19.7725	22.7813	22.2449	13.9331	27.2098	13.0113	27.376	21.9676	8.38613	12.1108	22.5456	22.5799
GRMZM2G063896	chr8	117822621	117824134	845.663	1629.86	1312.58	1493.17	984.254	1305.82	1006.04	1543.51	1550.28	907.379	898.28	815.718	1302.68	1358.13	1038.44	1239.07	808.65	842.773	1095.55	832.289	1181.38
AC189750.4_FG004	chr7	152351853	152354543	503.469	389.386	349.005	525.102	624.896	642.063	382.633	281.1	287.251	429.285	581.024	214.81	286.653	790.921	444.453	372.731	234.235	442.856	686.254	146.755	344.194
GRMZM2G031719	chr6	76072910	76078324	0	0	0	0	0	0	0	0	0	0	0	0	0	0	0	0	0	0	0	0	0
GRMZM2G117755	chr4	74457131	74461070	186.703	183.498	216.104	180.72	179.613	263.449	154.879	205.666	231.923	181.849	219.813	166.289	162.465	235.456	173.483	258.524	137.183	211.048	197.179	148.008	257.507
GRMZM2G077420	chr2	28893900	28897200	8.70611	10.0217	9.29345	15.5369	10.6362	15.9497	10.6324	11.6775	14.8074	12.1343	9.2172	11.7251	7.0967	11.4286	7.76732	13.6369	8.93459	7.18806	7.47114	10.9569	9.64701
GRMZM2G431445	chr5	4425953	4426553	0	8.49738	10.8786	9.00854	27.0609	0	0	9.72818	0	0	0	0	0	7.75132	0	8.54751	0	0	0	0	8.21568
GRMZM2G036872	chr7	170948242	170959424	52.6328	60.0998	54.0905	56.7554	54.3977	71.9115	74.3496	53.5166	54.5257	45.4071	67.7202	56.6816	60.9564	58.896	50.6424	51.6838	52.7218	62.1418	44.8191	51.0108	74.2787
GRMZM2G150925	chr1	10583794	10585796	11.2292	14.1405	7.43183	9.52181	0	7.60496	0	6.90145	5.83369	6.03863	6.99113	0	0	15.8944	3.71149	5.47797	6.82262	0	7.8763	13.4905	8.12614
GRMZM2G146541	chr8	24121949	24122603	0	0	7.82064	0	0	0	0	2.13566	0	9.18194	0	0	0	0	0	0	0	0	0	0	8.3579
GRMZM2G038183	chr6	164366994	164371384	29.9659	36.2183	32.6806	37.9806	37.2844	36.8393	25.3355	40.3868	34.7361	29.0587	28.8359	25.7608	28.0719	31.1028	27.6155	33.2076	28.5779	53.3869	29.6439	25.2815	44.4182
AC191070.3_FG006	chr4	42444473	42446902	0	0	0	0	0	0	0	0	0	0	0	0	0	0	0	0	0	0	0	0	0
AC214256.3_FG005	chr5	3987718	3989203	0	0	0	0	0	0	0	0	0	0	0	0	0	0	0	0	0	0	0	0	0
GRMZM2G072091	chr9	3856794	3860954	42.2305	50.8976	42.8434	52.3468	28.4965	61.7162	44.7322	59.5959	60.2102	43.7602	49.3889	43.1646	52.667	65.029	50.6452	34.6837	63.3417	16.4342	46.5618	40.3739	59.4204
GRMZM2G140033	chr4	169742198	169743919	30.287	34.8302	27.1397	28.1537	22.5346	32.3269	35.7959	24.9553	47.8399	26.0288	40.7995	29.4448	23.7161	32.3674	20.8912	33.9483	37.2872	20.4445	40.0814	22.9437	22.3809
GRMZM2G085873	chr1	260364370	260367349	0	0	0	0	0	0	0	7.03125	0	0	0	0	0	0	2.03742	0	0	7.745	0	0	0
GRMZM2G152777	chr6	72859997	72862075	115.774	277.474	54.2171	162.986	14.2467	61.4907	6.15558	231.455	115.997	14.0591	183.187	25.771	46.9977	119.83	110.861	101.453	7.14585	44.2	181.109	70.2053	17.6713
GRMZM2G109814	chr1	120247226	120248362	47.1686	73.5172	68.9663	85.1291	47.0848	49.4902	43.2541	82.9327	51.1947	65.5163	32.283	57.2683	0	8.62835	88.2931	56.5976	67.9457	83.1646	68.4399	75.3464	55.54
GRMZM5G809292	chr7	145148199	145152772	431.462	424.55	308.286	442.556	251.063	454.025	555.861	375.268	379.355	379.704	506.218	385.963	426.555	492.496	312.205	365.1	447.362	258.191	371.948	448.206	472.332
GRMZM5G848879	chr3	66531111	66531554	7.56098	7.33534	10.1548	8.9413	6.72639	5.99095	7.11528	7.84322	8.80335	8.39892	4.79709	6.32096	7.02796	5.20328	6.2335	8.11315	5.88568	5.67738	9.15738	0	8.12392
GRMZM2G459540	chr1	182872048	182872822	0	0	0	0	0	0	0	0	0	0	0	0	0	0	0	0	0	0	0	0	0
GRMZM2G098319	chr6	60178260	60181915	0	4.17086	0	6.09775	4.28299	7.23257	0	7.07709	0	4.40415	4.64668	0	0	6.45302	5.24093	0	3.87967	5.1351	7.24035	8.21728	3.20231
GRMZM2G122843	chr4	165639393	165662761	181.609	186.44	150.705	147.926	187.909	232.086	317.931	231.094	276.189	204.203	247.211	203.002	189.435	289.799	183.224	199.782	163.091	204.174	199.25	180.684	211.804
GRMZM2G152089	chr2	99381929	99382694	434.85	376.795	247.591	295.215	284.878	411.624	360.306	537.164	418.866	448.081	419.675	697.014	201.686	242.993	281.433	341.562	546.826	550.932	362.383	302.236	609.433
GRMZM2G458659	chr4	147253235	147255634	6.94646	0	107.128	0	20.4028	0	0	0	0	0	0	28.671	0	0	1.20326	59.0371	0	4.26611	0	0	3.19173
GRMZM2G154565	chr1	90219800	90221824	16.7855	32.3221	26.1873	18.0701	22.0797	21.7033	15.2343	20.3174	29.4005	18.3044	11.3951	6.08581	30.7558	35.1772	27.0704	23.4495	15.5094	18.4351	19.4993	17.9571	30.7562
GRMZM5G857998	chr3	64125756	64126281	0	0	0	0	0	0	0	0	0	0	0	0	0	0	0	0	0	0	0	0	0
GRMZM2G149216	chr10	55152599	55155474	6.76718	4.89076	7.90883	6.94179	6.20697	5.40518	8.11723	6.26551	11.3025	12.718	10.8217	5.85338	9.95834	7.41337	9.50784	13.5335	9.55974	15.8825	12.0177	5.25179	6.4063
AC233898.1_FG003	chr10	10446741	10447104	0	16.9678	0	12.2032	0	0	0	8.28695	0	0	0	0	0	0	0	0	0	0	0	0	9.11001
GRMZM2G083292	chr8	129341988	129343096	102.759	69.4658	127.168	0	0	8.15748	53.4418	59.1176	67.7326	67.1056	3.98558	62.5283	55.8505	52.6755	92.1264	50.438	47.9269	23.0871	34.873	95.6819	88.0301
GRMZM2G087063	chr1	80620044	80622805	137.096	105.589	88.6588	89.6807	67.5073	93.03	222.574	94.3345	90.3781	106.099	132.066	90.187	88.8469	116.218	75.0603	103.133	88.0506	87.2174	81.4798	105.272	94.5302
GRMZM2G074505	chr7	142798008	142798851	0	0	0	0	0	0	0	0	0	0	0	0	0	0	0	0	0	0	0	0	0
GRMZM2G431573	chr5	56985421	56998038	2.98113	3.25622	1.60986	5.35635	1.73081	4.96789	0	3.90001	1.8916	0	1.61282	3.75833	2.9315	3.66663	5.45681	9.13073	3.49111	1.61063	2.5005	5.44348	5.78187
GRMZM2G002465	chr7	99089642	99090413	0	0	0	0	0	0	0	0	0	0	0	0	0	0	0	0	0	0	0	0	0
GRMZM5G861603	chr5	130109354	130122744	81.0511	76.8193	64.5174	87.1317	80.0414	82.9611	87.709	67.1516	79.6169	87.7092	93.4735	73.2515	93.2574	83.9891	75.1187	70.9005	91.6172	81.5042	92.7258	77.8173	84.0391
GRMZM2G099238	chr6	62185010	62188328	33.0405	37.0693	37.6878	21.4296	24.2195	36.161	33.5363	27.2266	31.0793	30.1196	30.4459	33.3718	23.8069	49.7675	36.591	34.2471	40.4906	43.2053	38.1944	28.0496	45.782
GRMZM5G833578	chr4	222635907	222637426	34.9414	54.4627	47.6287	41.7665	2.63696	0	50.2161	75.2537	0.124855	0	73.6889	107.698	78.3054	3.40083	0.232499	48.2327	0	0.528621	0	2.47718	4.22015
GRMZM2G091583	chr4	183213763	183221580	78.6478	66.625	49.6113	61.2389	55.491	67.9933	65.1024	68.4306	73.4203	81.5326	69.8167	95.5594	63.151	68.355	64.7364	66.3304	63.2701	80.3072	69.0756	60.844	64.4313
GRMZM2G084486	chr1	245787397	245791441	3.39209	2.14772	11.5125	2.37084	0	8.91634	0	9.29604	9.48898	0	0	0	0	0	3.0377	2.56241	3.4866	6.99859	3.62824	0	9.24067
GRMZM2G057067	chr3	199305497	199307986	40.6706	65.1657	70.1362	58.2812	63.3037	75.3486	28.7774	42.9644	55.8854	39.6061	48.5066	60.1535	51.4706	48.7265	34.2498	51.4111	62.9444	91.9529	24.1409	21.9836	68.2395
GRMZM2G436391	chr1	259365002	259365770	0	0	0	0	0	0	0	0	0	0	0	0	0	0	0	0	0	0	0	0	0
AC206201.3_FG009	chr1	294932400	294936784	1.65063	1.79053	1.02659	1.07782	0.882351	2.848	3.78922	1.73943	1.61329	0	2.31531	1.36807	0	2.76239	7.6097	1.79076	0.799564	1.27009	1.63213	1.15302	1.23456
GRMZM2G389557	chr5	63277674	63280116	0.792361	2.79721	1.69948	0.550958	3.1669	2.98608	36.2798	2.31746	5.09853	2.37131	4.52711	1.6626	9.883	0	2.74021	1.59103	0.198781	9.47571	3.0733	4.01958	1.75684
GRMZM2G069630	chr9	93037769	93040591	4.39996	14.7786	2.7975	4.68876	7.23492	5.45376	7.35624	5.54571	8.82865	12.4356	4.80022	9.37831	0	10.4045	3.11653	5.94165	14.8126	4.11333	17.9278	10.8182	15.4907
GRMZM2G129502	chr4	199526893	199529117	14.519	9.72643	0.246263	4.94231	3.67291	5.6093	0.252136	5.35298	2.72448	4.38979	5.44823	4.61899	0	7.8396	4.37568	5.62652	0	4.17332	4.3559	0.249693	0
GRMZM2G333049	chr9	110319841	110320893	17.083	13.9491	13.1478	34.994	66.3379	24.9447	42.4758	26.4973	18.5112	41.9468	17.3305	39.1401	16.6291	33.2919	18.5442	61.61	16.3956	41.3728	50.5775	23.0686	23.359
GRMZM2G101463	chr5	209693886	209699045	201.028	236.6	244.998	267.77	228.595	242.864	215.245	265.894	304.083	219.591	198.557	212.552	245.335	283.499	218.254	235.624	193.07	168.019	211.878	199.38	258.508
GRMZM2G166956	chr10	110833466	110837705	0	0.476207	0	0.539536	1.77148	0.368919	0	0.576845	3.2942	1.36011	0.493456	3.57553	0	2.63554	0.634118	0	0	0	1.08717	2.2083	1.37773
GRMZM2G380015	chr4	240112730	240113905	8.23686	41.806	24.228	15.6836	20.781	17.8605	18.3608	24.3509	11.3682	31.8238	39.7927	11.7283	17.4521	24.0931	15.4492	26.2602	22.4379	14.5238	21.0941	25.5764	23.8443
GRMZM2G058681	chr8	6243295	6256960	58.2295	62.6651	20.683	82.0403	11.3772	256.516	157.029	153.968	18.0776	142.72	16.1636	118.001	102.861	71.8596	149.601	162.831	69.6405	200.795	78.8766	58.2057	90.2867
GRMZM2G017186	chr1	276322885	276328337	395.568	534.976	494.067	305.351	236.072	429.469	229.597	227.836	278.525	210.354	1082.85	166.922	140.691	251.347	308.676	370.677	321.175	710.207	240.247	371.018	467.356
AC206840.3_FG002	chr1	57349175	57349496	71.9246	74.4402	100.437	113.04	47.9973	49.0098	58.8656	67.5759	50.3108	74.5381	46.9864	71.5135	100.288	77.8033	66.7928	82.3587	35.9516	62.4392	65.8712	53.9055	89.5414
GRMZM2G043695	chr6	159858341	159859883	0	0	0	0	0	7.17058	7.80296	6.74994	3.85246	0	4.07467	6.0043	0	0	0	0	0	11.1355	0	0	12.1059
GRMZM2G703995	chr1	256161534	256162942	0	0	0	0	0	0	0	0	0	0	0	0	0	0	0	0	0	0	0	0	0
GRMZM2G555433	chr8	11847766	11848310	0	0	0	0	0	0	0	0	0	0	0	0	0	0	0	0	0	0	0	0	0
GRMZM2G152703	chr5	210019729	210021159	402.803	387.293	288.013	253.656	318.161	344.793	335.915	307.395	262.811	397.46	282.328	306	235.305	289.7	237.649	353.718	344.821	351.825	496.392	393.787	431.809
GRMZM2G005834	chr3	229996278	229999968	9.4939	11.9747	11.1282	4.98571	10.4052	13.7551	3.27408	5.75513	11.7099	9.84096	5.83392	6.44853	9.85552	7.42295	10.4449	4.92726	7.13168	4.29707	5.80057	11.7616	3.60777
GRMZM2G160237	chr1	39043377	39051301	365.76	344.812	293.956	299.445	267.325	363.892	362.382	356.674	314.929	342.407	370.988	357.902	268.259	335.237	331.269	378.792	384.774	374.716	338.434	326.681	399.384
GRMZM2G378580	chr4	23523781	23529631	182.669	150.418	158.796	186.075	200.078	169.717	159.74	163.176	233.038	141.863	154.364	134.748	175.226	190.498	194.265	172.11	188.379	160.389	231.988	116.825	152.387
GRMZM2G181484	chr3	179264406	179266842	50.5988	45.6699	35.4871	31.3752	35.3027	51.9338	50.9636	36.6162	50.6339	33.354	54.3118	31.0441	28.0403	57.367	39.4051	44.4901	32.2172	36.5765	55.4589	32.0669	45.4257
GRMZM5G860498	chr1	233717433	233719729	195.928	235.668	231.064	267.002	228.094	206.076	205.568	282.396	260.118	224.344	184.736	249.963	298.623	262.958	213.27	288.577	215.823	210.841	169.634	273.595	212.324
GRMZM2G043854	chr9	141434878	141438278	7.80584	7.85645	7.73513	5.26228	5.34059	3.11933	7.60109	6.33681	6.63611	7.25952	3.85149	8.65872	4.76667	5.37624	4.50445	8.52244	5.04695	6.52644	6.58585	7.57971	6.16168
AC198744.3_FG004	chr10	3058732	3060600	0	0	0	0	0	0	0	0	0	0	0.681808	0	0	0	0	0	0	0	0	0	0
GRMZM2G702129	chr5	190064582	190065406	0	0	0	0	0	0	0	0	0	0	0	0	0	0	0	0	0	0	0	0	3.53237
GRMZM2G060319	chr4	82358721	82359791	0	0	0	0	0	0	0	0	0	0	0	0	0	0	0	0	0	0	0	0	0
GRMZM2G138937	chr10	113302164	113304045	6.68898	14.1962	12.7839	7.37951	0	7.03748	0	6.50702	14.5799	16.8845	14.8401	6.03219	0	5.59517	10.4124	5.92341	6.54323	0	36.8951	9.31152	6.73398
GRMZM2G142241	chr9	132317534	132318333	0	0	0	0	0	0	0	0	0	0	0	0	0	0	1.99613	0	0	0	0	0	0
GRMZM2G309950	chr4	163643969	163644995	8.00693	10.3126	13.1865	12.4492	19.5361	15.6846	5.00746	2.43462	12.8056	23.0676	8.78253	17.6366	12.9607	1.68996	20.5517	6.04481	29.9672	5.60284	18.054	3.6012	3.2668
GRMZM2G154278	chr8	26066129	26069719	196.396	18.5507	182.585	192.071	48.8585	21.3418	29.2123	21.8536	42.9242	19.7871	23.5025	39.0228	196.192	43.4018	22.7111	188.496	227.154	198.978	41.934	20.1092	203.148
GRMZM2G311313	chr3	201236613	201237987	0	0	0	0	0	0	0	0	0	0	0	0	0	0	0	0	0	0	0	0	0
GRMZM2G093418	chr8	124839635	124840524	0	0	0	4.71604	0	0	0	0	0	0	6.49343	0	0	6.38756	0	0	7.93389	0	7.18891	0	2.58247
GRMZM2G062452	chr6	147687273	147690102	156.129	175.049	159.429	146.479	151.85	153.308	153.789	177.857	155.863	150.644	137.916	141.71	121.422	175.082	119.894	127.253	176.478	130.117	148.175	144.86	142.888
GRMZM5G875238	chr8	161916384	161921746	479.995	297.508	174.545	218.646	362.185	392.758	386.118	257.79	312.612	173.937	384.978	162.862	273.957	329.293	172.641	287.851	319.914	207.076	404.609	153.146	250.067
GRMZM2G164352	chr6	64516738	64523534	454.84	506.085	497.204	514.507	476.231	488.344	381.951	529.498	466.898	403.199	457.852	411.35	549.784	590.627	415.534	550.036	433.167	449.748	505.57	467.289	468.131
GRMZM2G079487	chr1	88530351	88543153	162.759	151.259	157.504	128.795	121.051	134.028	110.992	131.061	136.113	143.627	17.4941	135.783	114.09	106.13	62.9891	137.508	143.493	133.31	137.198	134.167	139.759
GRMZM5G830250	chr9	121026649	121050043	13.46	11.766	6.45789	7.95385	8.38651	14.2529	14.7756	11.8671	10.3839	6.0666	8.70738	12.0537	15.5516	17.5904	13.0614	19.0882	7.17082	8.58105	8.42806	17.3477	6.66321
GRMZM2G161291	chr2	184103713	184107235	70.2803	84.2978	87.0747	108.713	71.5057	74.3807	72.0501	108.004	97.0194	88.1857	58.4349	73.0004	77.1646	72.7545	96.8444	91.5265	77.1652	56.8002	67.6469	86.5958	82.7864
GRMZM2G704021	chr1	263387290	263391284	58.9262	54.0624	52.0275	39.4785	46.4431	35.5651	41.8395	39.642	43.0622	42.6775	66.661	67.9356	40.9455	52.4781	37.075	39.9657	53.1307	42.3548	48.7028	76.8133	54.1477
GRMZM2G082959	chr8	105086743	105088030	0	0	7.06884	0	9.55858	0	0	4.29798	6.82786	13.9755	0	0	0	24.0646	0	4.6562	0	0	3.26848	11.9403	2.16856
GRMZM2G177620	chr10	84787114	84791572	0	1.62998	0	1.7188	0.455069	0.350755	0	0.17999	0	2.57731	0	0	1.18202	0	0.387677	0.552661	0	0	0.126191	1.28491	0
GRMZM2G532534	chr9	152266749	152271833	7.78551	5.85749	5.40553	2.77441	0	5.04735	8.18031	6.70001	4.34017	8.48523	7.13967	7.52445	0	0	4.05833	4.29166	8.31867	5.40508	5.20042	6.9916	6.63629
GRMZM2G167649	chr1	139790126	139791962	187.596	157.765	95.4253	108.158	64.7765	103.882	191.108	140.592	110.131	160.666	147.118	141.797	76.3229	145.727	77.5779	139.939	161.975	67.6283	141.276	141.324	154.128
GRMZM2G062080	chr3	113430818	113432188	5.894	9.44635	8.72484	11.5538	14.66	11.2692	17.653	8.64124	7.02807	7.85418	8.54057	12.8914	9.47077	9.47844	13.9162	8.06002	12.019	14.5271	15.7084	11.1721	12.9451
GRMZM2G481261	chr6	163178133	163181036	108.18	86.1924	141.421	73.4628	97.3939	130.245	117.257	67.974	115.698	62.8025	101.53	25.6605	78.3582	145.199	54.2945	76.7013	71.9806	131.97	215.418	74.3876	119.877
GRMZM2G180732	chr3	217561100	217566838	123.8	229.601	257.863	228.973	241.554	286.939	190.902	162.738	177.061	171.4	197.653	221.527	207.812	290.699	176.818	230.727	177.549	214.763	210.848	231.324	292.201
AC232289.2_FG006	chr3	8627534	8627988	0	0	0	0	0	0	0	0	0	0	0	0	0	0	0	0	0	0	0	0	0
GRMZM2G540589	chr8	148484434	148487690	0	0	0	0	0	0	0	0	0	0	0	0	0	0	1.65432	0	0	0	0	0	0
GRMZM2G089598	chr4	5708642	5709883	0	5.01473	6.77667	8.70791	0	0	0	4.71785	0	0	0	0	0	0	5.38176	5.72331	0	0	10.3192	0	7.79299
GRMZM2G132882	chr6	55734175	55747620	2.26275	3.34316	3.38373	4.70823	3.3097	47.8144	6.21757	18.1551	24.4949	2.94401	4.52314	4.14503	0	4.91408	17.3623	3.7133	73.8503	49.3391	4.12062	6.84876	43.5402
AC183412.5_FG005	chr2	26850540	26854132	0	0.854342	0.150799	0.596515	0	2.56893	1.38526	4.13608	0.593074	3.06545	0.594524	0	0	0.368251	0.746627	0.2801	1.32261	0.352997	0.48618	0	0.232345
GRMZM2G035809	chr9	120877628	120882104	101.927	70.4108	53.6994	92.2363	135.449	77.9975	69.5566	73.0659	104.094	99.3671	126.492	45.2801	99.0261	77.0154	136.645	89.2308	82.2947	84.2004	129.919	70.3402	79.9899
GRMZM2G341747	chr5	38258523	38268547	155.184	146.315	124.994	151.243	123.714	166.052	139.543	123.468	145.646	134.195	162.298	178.394	107.399	134.915	114.794	158.642	156.652	150.681	119.631	129.149	185.366
GRMZM2G323679	chr2	32637800	32639325	230.078	192.527	236.75	250.05	188.13	232.201	188.205	227.364	215.78	157.55	206.795	134.109	216.102	216.659	251.961	245.849	232.055	152.798	232.028	181.751	204.408
GRMZM2G064302	chr9	22100863	22105552	2150.9	1538.53	2307.49	1978.29	1862.61	1940.75	1585.67	1752.57	1642.4	1439.35	1563.73	1390.07	2229.09	1695.37	1310.93	1890.89	1604.72	1839.86	1678.77	1160.09	1517.2
GRMZM5G854666	chr9	55547820	55548514	0	0	0	0.521834	0	4.49946	0	0	14.6255	0	1.12941	0	0	0	0.186395	0	0	2.97794	0	0	0.397046
AC197427.3_FG003	chr4	206165634	206169362	0	0	0	0	0	0	0	0	0	0	0	0	0	0	0	0	0	0	0	0	0
GRMZM2G127338	chr6	7124202	7126755	4.23343	3.54092	7.62167	4.7767	7.81133	6.82789	5.48656	8.78452	7.27622	7.55908	3.11694	8.39517	0	6.73217	5.41215	10.1722	10.4167	8.94667	7.86643	8.49615	5.16883
GRMZM2G322661	chr2	168699129	168707616	102.733	120.372	110.39	136.872	147.597	98.7624	134.186	117.771	118.955	111.869	108.008	146.367	127.167	148.61	107.998	128.411	153.089	153.313	126.452	108.718	117.84
GRMZM2G173372	chr1	7996053	7998214	25.6246	4.23496	30.4099	19.8127	35.0966	31.9514	79.1929	23.876	5.68001	38.0488	21.6845	26.5195	6.97537	32.7772	14.472	31.9718	29.5129	27.4074	9.88831	32.0641	46.0899
GRMZM5G851965	chr8	138868953	138870495	7.93984	0	7.76138	8.79444	0	0	0	0	0	0	0	9.28844	0	7.93268	9.25943	0	12.2617	0	8.4051	0	6.8308
GRMZM2G102891	chr8	73231940	73234723	852.487	683.201	801.998	761.226	544.725	676.984	749.465	876.788	701.471	591.98	597.961	734.502	636.888	631.931	494.107	663.85	548.522	480.707	441.207	917.639	645.793
GRMZM2G083081	chr5	920312	923543	128.365	62.2098	85.9344	89.7503	113.679	88.8087	112.332	83.9587	64.4552	96.6564	105.695	116.603	76.2222	110.158	68.7829	76.9262	99.7354	71.5854	147.218	105.742	83.9985
GRMZM5G845532	chr4	134838831	134840108	0	8.67034	7.44951	4.70381	0	4.46942	15.7535	10.8814	10.4244	0	8.66447	0	0	5.57926	0	0	0	12.2665	0	16.101	19.4859
GRMZM2G049390	chr5	144281596	144283761	157.993	174.926	189.949	168.837	213.61	151.402	104.975	159.933	190.771	183.57	109.703	149.652	159.192	116.964	218.477	178.491	125.907	188.003	199.669	141.436	144.971
GRMZM2G457534	chr7	16272206	16282431	40.3607	48.8346	40.7587	50.6805	45.7626	47.7017	33.6365	48.2465	44.0799	34.6078	40.591	33.3785	43.9548	57.6528	39.2331	45.8521	33.8411	30.4637	39.8752	29.1082	47.8216
GRMZM2G701580	chr10	102426753	102426957	0	0	0	0	0	0	0	0	0	0	0	0	0	0	0	0	0	0	0	0	0
GRMZM2G404081	chr6	106425278	106427173	0	2.66398	2.47194	2.76301	0	0	0	2.82261	0	0	4.27555	5.737	0	0	2.49216	11.3244	0	6.21377	3.00681	0	4.52278
GRMZM2G503738	chr4	182279430	182288526	105.028	124.685	102.761	102.052	103.315	91.3919	80.8884	93.8331	90.6421	110.795	92.2663	88.2395	106.165	93.6467	93.0778	108.652	80.5183	119.349	111.591	77.1174	111.279
GRMZM2G426467	chr3	97301170	97304941	59.5333	68.9851	103.298	43.5881	53.4841	58.4622	82.7212	127.507	60.0606	49.9738	37.2438	101.762	16.8635	64.9226	68.8567	99.2572	65.9699	78.9745	57.9398	134.131	110.506
GRMZM2G432662	chr3	183638285	183639680	116.439	98.6649	74.195	94.3738	106.404	84.9039	57.4064	107.048	104.296	128.392	95.3468	95.3588	89.3698	96.0468	76.1792	108.489	128.503	81.1741	149.779	146.33	94.5932
GRMZM2G052178	chr2	1287045	1290746	101.248	102.528	117.561	129.076	95.7901	91.8515	98.2448	132.296	118.325	99.834	94.937	87.7255	92.2464	107.2	93.3686	102.373	88.8627	77.7771	94.4183	83.9231	101.179
GRMZM2G401521	chr6	159824141	159825486	64.4042	42.3099	83.1927	69.7112	52.3371	82.2298	82.0706	67.85	65.991	80.1785	67.9519	97.6529	27.2291	63.7008	115.283	58.3554	95.0923	51.8787	125.07	52.752	64.7397
GRMZM2G102356	chr2	40588193	40589174	1152.34	1142.14	1058.92	1957.22	1666.9	1281.77	1310.48	1528.75	1229.28	1743.95	1666.92	982.006	1944.95	1599.93	2271.83	1192.14	1263.67	1271.42	1735.95	1545.45	1636.73
GRMZM2G156377	chr3	194255477	194256634	0	0	0	6.0989	0	0	0	3.1526	0	0	0	0	0	6.50692	0	0	0	0	3.51993	0	2.52996
GRMZM2G423636	chr2	234532947	234537870	12.956	20.1912	22.0039	21.4111	14.3953	12.8327	11.5671	15.5205	12.5005	14.7883	16.1977	18.6091	20.8687	19.7672	9.78806	17.0498	22.857	16.6395	7.84086	9.22811	8.39069
GRMZM2G421791	chr6	159430958	159435222	103.053	74.1923	107.136	89.5686	73.6028	80.9757	59.9242	111.207	82.1698	71.8146	47.9596	77.5369	78.5446	106.462	60.2026	76.8804	69.4771	64.1682	71.9739	58.6881	98.237
GRMZM2G070575	chr10	66168600	66179083	0	0	0	0	0	0	0	0	0	0	0	0	0	0	0	0	0	0	0	0	0
GRMZM2G527017	chr8	21594593	21596331	0	0	3.2037	4.36033	1.22396	7.03821	0	3.78182	5.60687	0	13.8112	6.92598	0	1.79121	0.65808	4.84742	3.98239	16.405	1.02903	2.35821	2.35298
GRMZM2G365298	chr4	162268143	162269502	48.5443	45.078	55.4767	64.0708	18.0247	16.8315	34.6748	47.7331	35.7454	47.2915	35.142	29.5186	9.20152	39.7876	39.3261	42.8655	17.6072	24.7858	49.9804	38.6825	14.9648
GRMZM2G158013	chr3	202035560	202040237	90.7054	16.5651	44.0796	49.1949	32.0359	49.1022	19.7196	44.2221	37.4569	48.3188	43.74	45.6155	43.3325	47.6513	46.0173	68.5054	104.921	40.4009	27.0081	20.5754	9.34958
GRMZM2G333079	chr8	111287694	111290414	0	0	0	0	0	0	0	0	0	0	0	0	0	0	0	0	0	0	0	0	0
GRMZM2G336813	chr10	53810809	53814077	3.83345	0	0	1.55918	0	3.60769	0	5.1746	13.3638	0	0	7.22493	4.95254	1.63358	0	2.14419	4.01154	13.3695	0	6.22362	4.95733
GRMZM2G139765	chr5	188666369	188668441	27.7828	14.146	9.67087	14.2793	25.4527	28.4086	24.7247	20.5429	28.0129	16.9497	9.47904	15.0461	18.5838	16.1831	32.945	9.87131	20.9948	25.6274	13.0926	28.2731	24.7001
GRMZM2G042933	chr2	3935463	3938281	42.506	73.0699	80.0913	43.9839	42.8872	31.3832	21.7577	2.39105	48.1303	50.9751	81.582	21.5863	25.5826	59.9711	24.9554	46.1399	43.9325	99.8341	27.1334	0	90.0249
GRMZM2G563662	chr1	98636315	98636567	0	0	0	0	0	0	0	0	0	0	0	0	0	0	0	0	0	0	0	0	0
AC186309.3_FG006	chr5	38388467	38389163	0	0	0	0	0	0	0	0	0	0	0	0	0	0	0	0	0	0	0	0	0
GRMZM2G359397	chr3	166381505	166384595	18.4207	17.4257	35.4968	15.5317	25.2998	17.9123	24.1107	25.6098	27.4764	34.4514	35.8367	24.7516	39.244	31.7869	33.1064	25.9185	35.9005	19.5415	22.8307	42.5899	28.975
GRMZM2G009025	chr6	4015352	4017399	11.9111	10.0251	9.96877	5.30686	5.84589	17.2491	7.48496	8.34685	4.88227	11.2455	3.23123	10.2887	8.04852	3.04668	4.52967	12.3476	3.06077	6.84323	5.49268	16.5024	22.4801
GRMZM2G342687	chr1	206555678	206556465	0	0	0	0	0	0	0	0	0	0	0	0	0	0	0	0	0	0	0	0	0
GRMZM2G356355	chr4	206500933	206504086	0	0	0	0	0	0	0	0	0	0	0	0	0	0	0	0	0	0	0	0	0
GRMZM2G416201	chr8	77169798	77172718	2.94572	3.58793	3.3332	2.39316	10.658	5.79187	4.14788	5.39072	14.3495	7.57799	2.35698	3.81994	0	4.25387	3.0235	16.8639	3.22376	3.75386	3.52117	7.85011	6.17139
GRMZM2G063473	chr4	166921643	166925328	74.7199	102.709	71.7146	125.857	63.5178	107.39	120.533	85.3465	151.288	102.21	135.212	88.9031	115.378	116.191	87.8058	108.583	102.607	62.411	99.0092	146.918	100.862
GRMZM2G038463	chr8	168330281	168330908	0	0	6.01269	10.8371	9.75994	5.73838	6.58173	2.9587	7.93083	9.02033	0	0	0	15.8767	5.79293	9.52719	0	6.52504	7.11535	0	9.50154
GRMZM2G050481	chr1	185297679	185299174	21.6272	72.3961	29.3787	53.5651	60.629	48.4079	30.8625	56.0232	49.1398	34.3594	85.7482	21.6467	51.7215	46.5924	41.4092	82.002	33.0579	66.5294	70.4625	22.9537	69.5942
GRMZM5G823855	chr9	155286240	155288674	339.452	389.798	428.393	338.224	421.193	448.873	337.778	417.794	518.383	407.089	367.767	252.724	388.352	367.624	463.342	418.847	314.582	447.002	412.689	295.345	476.586
GRMZM2G122357	chr6	1338451	1339388	4.29353	4.73704	2.92071	0	0	5.61074	0	8.5668	9.55204	0	7.52104	0	0	0	11.7821	0	0	0	10.5656	0	6.17852
GRMZM2G571253	chr4	193727193	193728326	0	0	0.112988	0.576556	0	3.29186	0	0	0	0	0	0	0	0	0.0694473	0	30.0368	0	8.71951	8.08881	0.599393
GRMZM2G000566	chr9	101389916	101393912	0	0	0	0	0	2.34099	4.32337	0	1.3988	0	0	0	0	1.93064	0	0	0	3.29531	0	0	0
GRMZM2G110295	chr1	286399278	286401536	82.8558	86.3617	94.202	77.0715	74.72	92.7052	56.9289	57.0555	65.1349	67.0692	53.027	53.4727	49.5953	83.4305	61.6591	51.1079	62.1335	58.5346	56.1834	58.6633	61.036
GRMZM2G081924	chr3	219191470	219198169	100.459	76.0356	87.5906	105.628	108.152	100.757	121.997	102.669	95.7546	127.117	100.59	107.099	76.5137	108.299	78.5417	105.506	91.1759	84.2985	83.905	112.027	101.413
AC196090.3_FG006	chr9	154016087	154018334	34.571	31.9454	41.0025	53.3377	98.9844	38.2905	38.0725	44.795	64.2573	53.9744	36.088	49.2974	29.8002	48.0048	29.8226	38.5695	34.1978	41.0389	39.7827	31.895	41.3928
GRMZM2G371944	chr2	3085013	3089430	122.566	184.996	138.427	162.868	157.497	161.501	162.66	147.62	119.317	112.798	203.062	97.6378	140.734	183.493	150.467	155.042	171.41	135.101	195.512	112.805	133.209
GRMZM2G144088	chr4	77450371	77453213	47.3345	46.3999	50.6057	53.9575	35.333	36.1513	59.7697	36.5425	37.2561	35.52	49.9469	68.713	19.5791	59.7766	50.7947	48.7437	33.9109	39.7805	49.033	52.2305	44.4842
GRMZM5G875774	chr1	152393671	152393797	0	0	0	0	0	0	0	0	0	0	0	0	0	0	0	0	0	0	0	0	0
GRMZM2G125243	chr8	171296765	171302771	21.8756	38.205	52.8287	43.1728	38.6228	60.259	26.8386	32.5892	29.2961	35.4589	23.7619	34.6847	41.6313	21.6964	34.2899	63.007	37.2297	39.8296	25.6481	36.759	38.7167
GRMZM2G062197	chr6	35595647	35597164	209.837	194.814	155.738	237.687	362.155	289.468	344.315	249.279	210.221	222.935	241.413	322.159	186.671	263.706	268.888	158.849	204.254	222.308	264.734	255.321	276.371
GRMZM2G101791	chr5	174670518	174678582	55.5511	49.5714	42.7698	45.3813	48.9068	48.6285	63.031	47.9936	62.6172	53.1392	63.5391	63.1455	53.0435	59.1873	57.8996	51.017	49.6622	52.4687	65.3144	52.7569	48.4276
GRMZM2G114503	chr6	166181463	166182323	186.575	179.84	73.6576	109.104	70.7316	128.561	126.479	209.498	101.719	22.7938	98.9306	87.7796	111.428	233.657	55.8878	67.2344	177.456	39.1623	191.073	71.746	52.9037
GRMZM2G377595	chr3	118175533	118177921	2.51788	2.73268	3.02064	6.32667	3.07274	3.18297	5.22622	5.75244	4.5333	3.61849	3.66333	0	0	6.14789	5.87658	5.51155	4.26345	3.1598	2.65065	3.46506	2.36855
GRMZM2G064597	chr1	48107458	48108272	0	0	0	0	0	0	0	0	0	0	0	0	0	0	0	1.42774	0	0	0	0	1.06749
GRMZM2G167576	chr9	36849525	36850583	0	0	0	0	0	0	0	0	0	0	0	0	0	0	0	0	0	0	0	0	0
GRMZM2G008326	chr9	13663724	13665310	17.5243	12.5309	15.6254	18.2123	0	9.38058	18.0213	14.5302	6.86974	12.4364	11.5771	12.134	0	13.3523	7.61987	10.0185	9.33454	18.7112	7.8664	0	12.5065
GRMZM2G123719	chr10	133273070	133276580	307.429	374.062	258.478	393.388	370.15	462.745	485.826	423.716	395.145	269.254	483.25	243.807	371.144	387.599	359.94	287.895	439.365	351.544	356.979	363.626	410.21
GRMZM2G078576	chr3	192114438	192124984	55.9501	45.3227	37.1179	53.9576	42.2169	47.0162	45.5345	48.9543	48.6592	36.7369	29.4918	41.8915	48.4172	41.4886	51.0252	40.1967	34.8998	38.4712	42.9254	48.4601	45.8539
GRMZM2G178917	chr2	192393127	192403181	138.421	184.065	164.304	178.41	186.605	174.358	214.335	163.964	253.525	165.6	266.05	128.065	216.454	236.189	174.757	168.275	197.5	183.096	184.053	166.247	217.643
GRMZM2G049070	chr1	69287953	69289335	20.3413	60.7308	39.2606	23.1571	38.1921	20.4298	54.8319	28.0677	27.3764	61.4571	72.2461	38.8997	36.7066	48.1535	27.7915	37.5407	47.7438	50.156	41.5299	59.3463	73.0341
GRMZM2G026452	chr8	122003961	122006379	0	8.96094	0	9.77784	0	7.20484	0	9.24705	0	0	0	0	0	0	14.5986	10.3514	0	0	7.11785	0	7.46463
GRMZM2G153096	chr10	145663134	145664488	0	0	5.75076	0	0	0	0	0	0	0	0	0	0	0	0	0	0	0	0	0	0
GRMZM2G060206	chr4	49319040	49319666	0	0	0	0	0	0	0	0	0	0	0	0	0	0	0	0	0	0	0	0	0
GRMZM5G825189	chr2	4825283	4825628	0	0	0	0	0	0	0	0	0	0	0	0	0	0	0	0	0	0	0	0	0
AC213463.3_FG007	chr5	13048032	13051225	182.97	171.006	107.004	186.256	199.883	119.381	191.704	165.625	163.716	9.87899	88.044	176.071	263.513	109.822	243.122	91.0269	208.52	85.5107	145.625	108.157	60.5513
GRMZM5G814945	chr5	171267256	171271268	9.58196	17.4173	9.33422	11.2473	11.5368	13.5905	15.0599	8.22668	13.4311	11.7649	11.2833	12.6046	9.51324	13.2037	12.9646	14.2058	11.5526	13.8173	9.1375	13.8942	11.6739
GRMZM2G579509	chr4	181684857	181692332	2.69918	5.02503	4.651	4.45375	6.55835	4.66832	4.0693	4.58214	6.40507	3.3334	3.9762	3.64027	5.70412	5.9306	8.08509	5.30927	2.79995	6.90393	5.77043	0	5.96222
GRMZM2G026656	chr2	23767789	23771398	74.2136	86.129	57.4237	81.494	58.3098	67.8779	78.2059	65.0607	72.1108	79.4389	64.0924	35.2036	36.2365	52.6502	83.9589	51.0848	62.0419	45.7865	71.3763	97.4711	65.9733
GRMZM5G873972	chr4	4452314	4452533	0	17.441	11.641	23.3903	0	21.1517	0	0	0	0	0	0	0	0	9.98536	21.9777	0	0	30.3068	0	30.8348
GRMZM5G818760	chr4	160109956	160112785	41.3229	25.7743	28.6142	35.834	15.7957	43.9412	25.4245	25.2808	44.6909	57.1853	39.8287	29.7583	26.3026	32.3296	27.7075	33.1985	57.5717	27.0358	32.8435	18.4853	27.9858
GRMZM2G024739	chr5	175728634	175732381	94.7685	125.827	109.278	124.613	124.524	106.461	86.8356	113.742	122.241	114.419	136.609	84.9204	117.403	137.403	143.355	110.625	139.824	112.965	159.188	94.9562	110.981
GRMZM5G811084	chrUNKNOWN	3108967	3109567	0	0	0	0	0	0	0	0	0	0	0	0	0	0	0	0	0	0	0	0	0
GRMZM2G097977	chr5	212233141	212237929	75.5749	74.3802	80.5965	100.124	78.6466	90.3373	73.9707	90.5491	83.7464	92.2307	87.9539	69.7095	83.2638	91.6012	67.19	72.4597	72.8692	59.3817	75.755	75.6049	74.9599
GRMZM2G455809	chr1	46678941	46680363	51.7663	52.4514	24.7508	49.4313	47.1383	41.6657	42.7256	43.568	33.7254	66.046	42.3407	25.6297	29.5682	68.8403	42.226	54.9177	47.0671	33.5364	69.743	60.8953	49.5937
GRMZM2G122628	chr6	30126583	30130757	1.21019	1.79848	0.431176	2.30141	1.57582	1.53472	0.734244	3.47356	2.7152	1.86517	0.759589	2.24081	1.28217	4.21117	1.76919	3.52776	1.39049	1.53482	1.95819	1.01905	1.80202
GRMZM5G845472	chr7	172974689	172975756	0	10.4462	0	0	0	3.58658	0	0	0	8.97129	0	0	0	3.72623	0	0	0	0	0	0	0
GRMZM2G101117	chr7	79970164	79972088	76.7643	111.114	152.98	76.6005	155.523	146.827	74.8158	57.9737	99.6711	142.165	104.385	42.276	38.2409	91.78	15.975	57.9476	20.7514	113.512	37.7828	39.1217	118.165
GRMZM2G702279	chr3	222536523	222537045	0	0	0	0	0	0	0	0	0	0	0	0	0	0	0	0	0	0	0	0	0
GRMZM5G875277	chr9	96672306	96672468	0	0	0	0	0	0	0	0	0	0	0	0	0	0	0	0	0	0	0	0	0
GRMZM2G702499	chr4	81471458	81471734	0	0	0	0	0	0	0	0	0	0	0	0	0	0	0	0	0	0	0	0	0
GRMZM2G702950	chr10	5287638	5291082	0	0	0	0	0	0	0	0	0	0	0	0	0	0	0	0	0	0	0	0	0
AC202707.3_FG002	chr4	49937682	49941580	0	3.0848	0	0	0	0	0	4.5417	3.75873	0	0	0	5.1738	5.52304	2.95964	0	0	0	4.44953	0	2.11667
GRMZM2G176384	chr2	59456230	59457263	0	0	0	0	0	0	0	0	0	0	0	0	0	0	0	0	0	0	0	0	0
GRMZM2G538198	chr7	104660576	104661643	0	0	0	0	0	0	0	0	0	0	0	0	0	0	0	0	0	0	0	0	0
GRMZM2G045128	chr3	192496984	192504121	36.5816	48.1928	38.9892	61.0879	42.9924	64.7965	42.9238	52.0584	57.3565	57.6192	39.0945	39.9084	56.9803	56.182	68.1484	59.7881	44.3561	44.6007	39.2984	33.8243	44.0948
GRMZM2G154221	chr8	26088976	26098323	46.2552	48.8248	58.1452	52.7428	62.3786	62.5088	61.1399	55.5433	87.0393	47.3603	64.7283	33.5657	60.3383	89.9713	70.5389	56.5105	55.6611	47.7764	64.4599	46.5997	54.9066
GRMZM5G887631	chr7	160059329	160068443	358.482	396.093	335.691	434.988	227.92	385.081	373.961	466.643	322.959	272.955	315.578	344.656	366.754	387.175	238.103	367.635	340.182	259.162	302.095	295.672	325.476
GRMZM2G132522	chr2	132348850	132358061	0	0	0	1.93055	0	0	0	0.428321	0	1.60952	0	0	1.15724	1.61831	1.39592	0.964133	1.72022	0	0	1.19901	0.15611
GRMZM5G884466	chr1	301264980	301284057	90.7186	129.559	90.2326	112.457	72.32	102.488	125.684	127.237	98.6937	86.4301	134.948	102.157	97.1065	127.301	76.5689	121.221	123.712	69.5977	115.517	121.002	116.144
GRMZM2G083239	chr3	43407031	43408310	0	0	0	0	0	0	0	0	0	0	0	0	0	0	0	5.32921	0	0	0	0	0
GRMZM2G153017	chr10	145614058	145624311	45.2899	69.3652	41.4148	82.3567	112.986	75.6778	45.1362	50.9912	20.141	24.9322	36.7611	0	124.524	94.3971	71.4627	21.9997	50.271	75.278	58.2374	39.9146	43.5325
GRMZM2G090422	chr1	277739113	277741150	1707.45	2182.64	2054.01	2165.88	1563.52	2111.08	1755.67	2427.88	2127.65	1766.49	1597.45	1635.06	2018.7	2168.97	1875.56	1748.75	1649.03	1699.08	1475.39	1875.93	1911.85
GRMZM2G174730	chr6	156981327	156986712	303.733	229.888	264.679	200.105	236.776	236.841	195.583	315.123	186.249	193.403	170.265	306.17	208.093	215.759	176.03	277.099	203.416	157.796	199.86	306.888	221.703
GRMZM2G148144	chr3	141868695	141871913	17.7263	15.8467	20.1697	24.8599	7.6172	21.018	16.5647	21.3703	21.0874	17.0003	10.3896	24.4516	11.1741	19.7736	17.0245	17.083	18.6185	17.7719	20.1426	9.90519	26.6184
GRMZM2G106336	chr4	2649671	2651390	4.91137	0	0	0	0	0	3.96819	0	2.67596	0	0	0	0	0	7.95564	4.13197	0	0	0	0	6.6438
GRMZM2G466563	chr1	220848985	220851551	0	0	3.37376	0	0	4.77714	0	0	0	0	0	0	0	0	0	0	0	0	7.31978	0	0
GRMZM2G332410	chr8	120592108	120604200	3.13647	2.1164	1.09118	2.22131	1.27967	2.00178	2.48889	1.63779	1.41341	3.33337	2.26935	2.20688	2.71351	2.56001	1.78187	1.17573	3.6478	2.79379	1.75641	2.43947	2.12528
GRMZM5G871249	chr7	126971777	126971942	0	0	0	0	0	0	0	0	5.66135	0	0	0	0	0	0	0	0	0	0	0	0
GRMZM2G119359	chr9	25709470	25712485	48.0513	47.3435	46.9519	44.181	55.1125	45.7665	49.6567	49.7892	39.847	47.7349	39.341	37.0747	46.6784	47.8337	51.7818	50.4522	39.659	33.7623	42.1874	41.8295	43.2071
GRMZM2G316778	chr4	174042011	174044874	22.883	20.9779	34.7552	18.1025	34.2092	24.5819	15.1341	42.1028	13.9707	5.33595	0.727264	30.3188	69.3095	24.4176	46.7926	18.1982	5.64437	21.6117	13.2943	30.5599	37.439
GRMZM2G006377	chr6	157582699	157589894	101	105.706	146.216	124.452	199.719	88.8753	122.75	72.2262	173.368	127.616	119.453	92.1536	39.768	74.1649	112.752	106.105	68.4356	213.201	80.0434	73.2633	103.981
GRMZM2G103725	chr10	110745903	110751262	14.8487	19.8228	19.7417	15.5325	25.6574	26.6693	18.1453	17.7591	22.3409	14.8296	12.7158	11.9005	19.1678	12.2118	26.9624	22.5056	11.7232	21.9227	17.0649	22.7444	12.4213
GRMZM2G167728	chr1	167029743	167032930	37.3179	38.9912	59.1895	49.7262	66.2905	56.5778	31.2762	46.5883	32.7461	36.1693	50.9809	53.147	56.9795	51.9076	44.4598	30.0929	36.2464	36.6327	38.543	42.7101	48.1987
GRMZM2G028796	chr9	114690542	114717781	25.2977	18.6566	25.1355	23.94	23.5129	33.9832	29.7322	25.0132	37.895	9.07302	27.3385	8.9192	34.931	36.325	32.782	37.0367	10.5472	10.1468	15.0446	24.7933	20.1459
GRMZM2G053980	chr6	140057114	140062853	9.753	17.0901	7.87757	22.3306	14.4191	23.3119	0	23.2928	26.9921	16.6401	25.1689	16.4355	16.5361	23.8612	23.4754	17.9271	19.9611	26.1639	23.685	14.3794	23.743
GRMZM2G095511	chr1	274531472	274533269	71.1981	48.0625	42.6506	24.6563	59.8786	54.678	89.0826	47.0247	37.2717	69.1451	58.0902	94.0023	56.2612	33.4046	54.1847	70.91	75.91	28.0329	17.674	93.7235	32.344
GRMZM2G143238	chr1	270665188	270669476	45.436	47.0999	45.7226	34.7225	45.2733	42.503	30.0989	38.2691	32.9612	31.7936	38.8704	37.8352	34.5385	36.2088	32.4136	33.8403	25.5009	37.6408	36.3251	29.5844	33.2065
AC203220.3_FG006	chr7	82403004	82407448	0	0	0	0	0	0	0	0	0	0	0	0	0	0	0	0	0	0	0	0	0
GRMZM2G100058	chr7	143176181	143177591	14.6738	9.87262	10.643	8.4883	12.895	13.7876	13.8424	9.89044	15.2199	10.0143	10.5733	21.827	0	6.25799	15.0458	15.1761	10.965	21.1695	10.7705	17.4259	10.9671
GRMZM2G102075	chr7	11335165	11337275	352.82	375.53	359.174	401.075	348.979	414.855	368.79	443.89	381.127	302.671	294.207	334.495	415.378	368.604	397.606	397.253	290.396	334.072	316.128	318.908	336.909
GRMZM2G314328	chr1	234729687	234734594	0	1.66431	1.35692	1.70237	0	2.63314	0	1.31922	3.73429	0	0	0	0	0	1.97776	1.73366	0	1.51266	1.66108	0	2.7411
GRMZM2G097812	chr9	144508636	144511665	59.552	71.6419	121.536	97.6438	145.1	97.3595	106.686	152.259	77.4443	175.553	94.8406	138.681	96.8718	122.497	104.589	180.592	112.267	103.159	91.5932	81.1111	103.95
GRMZM2G118951	chr6	132225946	132227629	243.193	229.059	245.969	214.094	108.047	171.792	128.849	183.391	177.244	185.536	186.526	162.947	103.74	161.542	95.3967	163.32	154.123	123.584	187.574	161.646	247.131
GRMZM2G425148	chr6	169081719	169083677	0	0	0	0	0	0	0	0	0	0	0	0	0	0	0	0	0	0	0	0	0
GRMZM2G154595	chr6	165631097	165635858	2348.95	2115.37	1672.06	1495.19	1316.1	1741.5	1577.74	1516.09	1296.83	1776.95	1701.44	1665.6	1461.17	1469.64	1626.01	1597.42	1688.27	1119.16	1328.98	2626.99	1612.01
GRMZM2G003682	chr3	178098597	178100462	23.1926	24.8735	17.068	23.4417	12.183	19.2025	20.7213	23.7222	15.5161	13.6656	34.1669	25.0614	19.1313	20.2886	11.1106	26.359	27.5426	40.4244	12.6057	11.4714	39.8229
GRMZM2G018146	chr2	221130037	221131541	59.666	59.3728	59.1736	49.5579	61.1779	51.0149	32.4831	63.7779	49.9153	62.6517	34.4382	69.0831	58.3506	55.0017	52.2207	33.1638	45.0777	51.8907	62.191	84.8657	62.6536
GRMZM2G009901	chr1	290200585	290203083	32.3167	44.628	40.5268	24.7074	34.8168	35.2068	39.139	29.0006	35.3162	22.9621	58.9165	16.1892	28.1677	31.7959	38.7401	49.9271	36.6365	40.1668	42.2192	23.2364	60.3674
GRMZM2G034318	chr9	37148800	37149945	9.67641	34.3666	11.8445	10.5668	12.203	20.4453	0	26.4513	9.4467	34.031	10.2686	34.4897	13.2723	38.4955	18.0125	22.7189	31.3451	11.533	57.4599	0	43.7376
GRMZM2G044269	chr1	221785672	221789403	0	0	0	0	0	0	0	0	0	0	0	0	0	0	0	0	0	0	0	0	0
GRMZM2G080816	chr8	164616425	164619629	205.691	272.071	211.868	223.977	200.96	365.477	408.815	223.552	237.945	211.511	284.55	263.457	328.026	373.981	273.366	298.09	317.691	222.57	290.174	278.171	289.598
GRMZM2G005461	chr9	19289415	19290344	54.5996	76.2412	43.228	78.311	50.3541	93.4608	28.1695	85.9927	111.692	36.0522	77.8395	77.6327	0	71.0554	66.713	62.5621	79.0428	67.7128	50.1883	117.119	45.643
AC199554.2_FG003	chr3	177450125	177450299	0	0	0	0	0	0	0	0	0	0	0	0	0	0	0	0	0	0	0	0	0
GRMZM5G895534	chr2	203517455	203518643	23.83	73.918	47.3232	40.5208	103.644	83.6345	35.232	94.7079	64.4344	89.6008	60.2465	94.5407	92.1507	68.5604	76.0757	79.6304	55.4352	62.0212	65.9186	58.8137	45.5953
GRMZM2G022768	chr8	92078180	92082751	84.4457	76.4565	73.1083	75.6759	72.6241	61.9456	72.9971	84.5989	79.0767	97.2793	67.5732	64.6009	70.9847	63.098	95.9651	69.2886	66.422	77.3363	69.747	100.141	73.5716
GRMZM2G172101	chr2	222875576	222883048	153.712	100.234	140.051	183.559	121.235	116.121	109.62	128.404	70.72	103.27	139.416	155.524	122.653	116.047	132.431	119.592	133.334	86.4396	101.144	157.625	115.38
GRMZM2G059821	chr8	31488442	31488936	0	0	9.85563	10.9606	0	0	0	0	0	0	0	0	0	0	0	0	0	0	0	0	0
GRMZM2G401606	chr3	15435062	15437648	0	0	0	0	0	0	0	0	0	0	0	0	0	0	0	0	0	0	0	0	0
GRMZM2G075837	chr7	127373366	127374581	47.7891	42.5233	37.3923	35.6944	37.2435	54.659	30.2026	47.4304	14.6496	35.1923	33.8671	46.7914	11.0783	30.7245	41.5899	51.6263	45.287	37.9188	62.4569	42.6661	27.9439
GRMZM2G701394	chr10	94035798	94036372	0	0	0	0	0	0	0	0	0	0	0	0	0	0	0	0	0	0	0	0	0
GRMZM2G124321	chr8	173078779	173083930	107.371	213.508	72.8528	146.895	113.103	168.234	146.283	103.575	99.2752	92.6727	160.506	70.097	120.457	257.848	102.395	185.745	166.263	76.7154	134.447	108.482	142.282
GRMZM2G032721	chr2	41768301	41769956	362.495	51.6677	37.7549	424.539	268.599	410.167	632.875	350.242	504.628	229.538	615.927	312.854	424.409	489.161	402.469	242.053	378.53	340.154	507.101	453.443	400.394
GRMZM2G324863	chr4	239003443	239010011	15.6707	24.1795	26.2441	25.2048	20.8929	23.5685	23.8659	21.6198	26.3977	18.9988	19.8334	22.4244	27.2444	25.5157	27.7368	25.1474	29.5842	24.1266	27.1267	19.162	32.0304
GRMZM2G139198	chr8	171777247	171779390	107.15	80.7913	96.67	106.607	82.2489	80.6231	86.96	127.438	76.1521	68.8439	76.6106	57.5247	93.4756	56.3856	62.7537	82.8526	131.25	46.5495	45.1845	83.2598	54.1792
GRMZM2G423917	chr8	159699117	159700793	91.8704	61.9741	98.9434	46.8386	82.8813	62.4334	50.1299	51.0996	67.1664	101.171	49.4663	42.5144	65.4892	49.166	72.9375	81.5749	60.2491	44.8737	61.6277	62.2	84.2524
GRMZM2G140443	chr5	48873357	48882695	19.0902	15.0326	27.7828	11.9219	17.9262	17.1906	0	25.837	24.8132	19.9489	35.1549	42.9692	8.08515	5.20551	20.3109	14.0564	35.0264	14.7888	18.3415	16.2256	14.7419
GRMZM2G327855	chr8	15592562	15594935	0	0	0	0	0	0	0	0	0	0	0	0	0	0	0	0	0	0	0	0	0
GRMZM2G342895	chr7	152693097	152698988	3.15166	8.08505	7.91599	8.17028	7.52887	6.38105	5.27556	8.76761	7.1672	4.14173	6.51407	6.27943	10.0369	13.3806	6.24951	10.02	7.22896	7.21705	8.20392	9.54547	9.80862
GRMZM2G439201	chr7	171631429	171634285	991.691	1216.62	1295.8	1353.85	1344.07	1148.9	981.967	1332.09	1240.85	810.397	1079.75	657.517	869.765	1175.91	1552.51	1260.97	627.727	968.955	971.315	981.546	1035.09
GRMZM2G037683	chr3	58293667	58305532	72.8324	115.296	120.983	119.856	81.9533	118.185	77.2722	139.63	122.268	83.7935	82.4665	88.2767	81.7963	129.139	108.29	109.523	99.0384	100.251	102.318	78.0475	99.1628
GRMZM2G020073	chr1	243401409	243407948	5.92075	12.6131	9.15066	4.22279	8.62344	18.5963	12.6279	22.8843	16.4894	6.87824	5.46828	9.2993	6.16156	14.7325	15.2235	9.39263	10.4284	15.6539	11.9816	18.5071	14.5868
GRMZM2G144898	chr5	200048602	200049849	0	0	0	0	0	0	0	0	0	0	0	0	0	0	0	0	0	0	0	0	0
GRMZM2G017805	chr5	35269186	35273535	178.997	156.634	155.884	144.65	146.935	162.397	154.104	128.43	145.365	174.714	164.239	163.67	118.42	139.699	141.249	138.872	173.647	133.389	151.401	162.138	159.466
GRMZM2G059010	chr10	21678998	21694247	44.1393	35.047	49.234	39.4831	29.0548	42.2141	46.6254	43.4056	30.6269	33.2357	40.8695	45.4947	36.58	39.6078	34.1412	40.6907	39.3572	23.4183	34.9036	39.7124	38.2364
GRMZM2G097109	chr1	263190304	263198015	212.983	210.528	176.982	178.977	233.943	271.242	344.717	181.945	241.656	132.162	324.715	150.246	225.301	276.985	219.305	187.674	231.147	202.685	262.175	198.332	214.75
GRMZM2G313162	chr9	110987243	110993352	7.3624	7.70829	9.17397	11.2326	10.3654	7.17807	8.20082	9.00078	21.1862	9.1303	18.4314	12.5638	0	10.5849	10.3197	15.7693	7.45559	13.2878	14.4303	0	8.80646
GRMZM2G083745	chr5	214170898	214174196	37.5766	23.2356	31.6277	67.005	24.4911	49.349	27.1878	45.4712	43.0126	29.4379	30.4552	39.3716	57.7306	47.2254	66.9105	56.8148	66.0403	22.87	27.2211	37.4004	56.8447
GRMZM5G894432	chr1	219337242	219339525	0	5.12408	3.04621	45.1153	0	0	102.842	19.3671	27.642	15.75	6.70575	28.8943	0	0	2.93285	0	0	27.6008	32.2798	26.6973	0
GRMZM2G027847	chr9	47764197	47764620	16.3219	44.3906	33.3678	16.0362	0	23.9287	0	12.6238	19.1303	18.6603	16.5987	0	0	13.4385	15.0706	33.7255	16.3601	0	16.7887	0	27.7447
GRMZM2G013971	chr3	45024039	45026230	18.5507	18.241	21.6872	30.0475	14.544	17.89	20.5672	17.8495	18.9571	24.8631	25.103	15.1912	8.55313	13.6872	21.8837	20.2167	20.5637	24.6448	19.3489	25.0228	27.6025
GRMZM5G819751	chr1	233753367	233755177	4.82282	2.85995	2.73719	2.44722	1.88369	4.17746	0	1.72345	1.29374	0	0	0	0	2.97494	0.926686	4.85856	0	0	2.48567	0	1.46852
GRMZM2G171179	chr9	11530109	11533070	252.799	263.306	259.679	230.665	433.194	273.387	243.179	248.403	270.728	275.078	298.788	267.725	303.641	270.556	321.063	254.021	253.685	294.236	351.422	256.816	298.746
GRMZM2G001342	chr4	13769810	13770303	0	9.23954	3.61208	5.58286	0	9.89101	0	6.53114	4.81802	0	0	0	0	8.98019	4.74657	6.76772	0	5.09908	6.45116	0	6.25942
GRMZM2G005112	chr3	179213282	179214280	0	0	0	0	0	0	0	0	0	0	0	0	0	0	0	0	0	0	0	0	0
GRMZM2G171114	chr6	103706377	103709906	0	2.49035	1.7568	1.30877	0	1.93538	0	2.07939	0	0	0	0	0	0	0.911825	0	0	1.94125	0	0	1.56122
GRMZM2G335815	chr3	194230586	194231273	0	0	0	0	0	0	0	0	0	0	0	0	0	0	0	0	0	0	0	0	0
GRMZM2G110531	chr1	240588649	240590405	0	0	0	0	0	0	0	0	0	0	0	0	0	0	0	0	0	0	0	0	0
AC214502.2_FG009	chr8	15328841	15329468	0	0	0	0	0	0	0	0	0	0	0	0	0	0	0	0	0	0	0	0	0
GRMZM2G148485	chr4	152566393	152579882	0	2.70567	0	0	0	3.08885	0	0	0	0	0	0	0	0	3.65396	0	0	0	0	0	1.79806
GRMZM2G146800	chr10	128373128	128374182	0	0	0	0	0	0	0	0	0	0	0	0	0	0	0	0	0	0	5.28998	0	0
GRMZM2G387837	chr1	4023201	4025627	27.741	23.8424	18.9224	13.8274	27.5229	22.8978	12.4618	47.0718	11.718	33.9155	31.2367	22.7809	17.4942	24.2001	47.4919	24.3904	13.9355	9.28922	28.0933	26.4887	16.9349
GRMZM2G123029	chr10	87089586	87092722	334.83	440.683	384.701	457.784	1063.06	129.065	580.76	445.66	658.082	477.893	477.073	289.285	407.168	472.476	455.441	217.84	339.049	670.063	420.451	412.731	170.752
GRMZM2G302563	chr5	111967607	111968586	0	0	0	0	0	0	0	0	0	0	0	0	0	0	0	0	0	0	0	0	0
GRMZM2G361535	chr5	189065105	189066171	0	0	0	0	0	0	0	0	0	0	0	0	0	11.4171	8.35055	0	0	0	0	0	0
GRMZM2G096363	chr6	87674178	87678988	32.7991	47.4571	32.5905	33.5071	31.2455	37.5323	43.4587	36.4449	42.9291	39.8356	35.8374	34.5522	39.2291	37.6858	40.0052	34.2815	36.6791	44.9917	37.7314	34.0656	45.0291
GRMZM2G096717	chr2	63946743	63947690	10.6032	18.2891	9.06862	0	9.11914	10.7392	17.0396	60.362	12.9119	11.9796	13.9103	17.3223	0	10.8064	15.8493	11.0545	15.1886	36.0552	9.84294	0	11.5126
GRMZM2G113238	chr5	193845842	193847042	0	0	0	0	0	0	0	0	0	0	0	0	0	0	0	0	0	0	0	0	0
GRMZM2G453845	chr2	218344968	218348242	0	0	0	0	0	0	0	0	0	0	0	0	0	0	0	0	0	0	0	0	0
GRMZM2G170289	chr4	156516364	156518588	6.07476	7.73755	2.52256	7.68654	4.16607	6.13121	6.81158	4.52926	5.99155	7.18962	5.13108	0	5.66305	10.8788	5.54037	3.41344	6.02726	3.0809	3.99369	9.80856	5.72687
GRMZM2G531230	chr2	5071038	5071551	177.094	90.5964	83.6214	139.894	119.863	89.7313	236.946	165.224	100.512	115.89	137.589	90.3835	29.8672	197.581	79.8545	147.465	79.8895	82.0952	118.928	75.4537	141.551
GRMZM2G012901	chr8	79188142	79189073	88.8886	88.4875	94.779	82.9791	91.3922	91.3174	70.0629	99.3159	93.8142	103.658	80.9802	96.6651	80.7799	102.422	93.5384	94.3239	97.8944	109.145	81.5915	74.1445	120.289
GRMZM2G081829	chr4	155224623	155229873	186.202	162.749	147.836	163.131	170.436	153.005	164.202	154.801	175.845	185.084	189.006	164.341	193.889	179.334	161.479	163.682	162.065	159.72	181.112	171.86	160.417
GRMZM2G033230	chr8	120608900	120610664	0	0	0	2.86693	0	3.46818	0	5.83338	3.99615	5.41403	0	0	0	0	2.93247	3.58964	0	4.31758	0	7.10583	2.06368
GRMZM5G860632	chr1	295192862	295193659	23.4847	15.9796	20.6349	14.1414	0	15.9086	16.3657	9.99673	0	13.6686	10.8781	14.2847	0	0	12.5054	9.90323	14.0509	24.0223	25.5984	0	18.213
AC191568.3_FG010	chr3	26085713	26087287	0	0	0	0	0	0	0	0	0	0	0	0	0	0	0	0	0	0	0	0	0
GRMZM2G074024	chr1	248853575	248860904	59.1587	63.3013	48.882	49.029	71.6905	52.3592	64.5913	48.0537	75.5608	48.2065	59.1449	31.1675	42.4914	92.9048	58.9974	37.4143	54.8024	48.8944	65.3443	17.9495	63.9719
GRMZM2G034991	chr9	2961212	2961902	0	0	0	0	0	0	0	0	0	0	0	0	0	0	0	0	0	0	0	0	0
GRMZM5G817350	chr7	138690478	138692964	1.89741	2.09217	4.32405	2.47979	11.0811	42.6142	11.1047	2.67767	2.30922	2.53111	2.3309	2.94958	0	13.9143	12.2778	1.62575	2.65873	1.70101	2.75618	0	4.10747
GRMZM2G470723	chr9	128620747	128645761	0	0	0	0	0	1.04846	0	0	0	0	0	0	0	0	0	0	0	0	0	0	0
GRMZM2G163378	chr5	26369406	26372186	0	0	0	0	0	0	0	0	0	0	0	0	0	0	0	0	0	0	0	0	0
GRMZM2G128520	chr7	9102602	9113181	0.13892	0.145513	0	0	0	0.0743032	0.573742	0.177468	0	0	0	0	0	0	0	0.111448	0	0	0	0	0.105339
GRMZM2G029307	chr10	64264078	64268175	48.0507	53.8587	57.5644	67.6579	57.5175	67.9807	62.9426	69.1225	66.7131	53.1574	69.104	52.1672	53.6583	55.3154	54.2828	76.136	64.3927	53.4518	59.7256	58.1676	69.8591
GRMZM2G023285	chr3	200698726	200700272	8.81139	14.0453	13.4301	11.1521	14.8592	12.215	9.46995	10.44	9.86576	10.3017	8.20946	0	12.8584	9.04157	16.2714	7.63556	5.53279	8.45339	18.2356	8.39616	10.5672
AC192204.3_FG005	chr1	204074773	204076473	495.483	145.393	146.087	178.854	159.052	272.819	1024.23	186.242	252.347	773.741	678.812	514.477	7.60598	357.886	210.071	223.039	688.541	220.969	347.737	437.637	286.415
GRMZM2G350773	chr2	215041995	215042876	0	0	0	0	0	0	0	0	0	0	0	0	0	0	4.74893	0	0	0	0	0	0
GRMZM2G016671	chr1	276329888	276362808	103.16	79.001	67.0283	69.858	77.9427	67.6075	81.9811	62.1586	87.5448	81.9848	115.378	100.655	67.3581	64.4728	80.8808	83.8628	133.837	77.5386	49.2592	80.6603	76.5789
AC191412.3_FG005	chr4	198870614	198910724	0	0	0	0	0	0	0	0	0	0	0	0	0	0	0	0	0	0	0	0	0
GRMZM2G151553	chr10	88268567	88270221	6.91546	12.3794	8.7127	6.37043	8.32692	6.37238	0	0	0	3.73764	2.54716	0	0	7.52888	0	3.59328	0	8.38378	4.10138	0	7.38335
GRMZM2G056986	chr8	167454660	167455894	72.4581	41.77	70.0459	61.955	60.7287	63.8869	33.2351	68.7124	11.3064	67.0596	76.6991	52.9893	78.3027	86.1393	46.3538	52.8245	89.4301	29.2047	44.9466	61.2901	53.0799
GRMZM2G470307	chr3	2101163	2106467	41.4505	30.5657	28.8846	33.6708	27.179	27.9944	48.3529	30.0921	24.1371	26.8437	36.5304	32.6977	33.1393	25.2406	21.9497	30.3222	42.4706	21.4322	19.7408	37.7014	21.9761
GRMZM2G156565	chr1	295474869	295483513	60.9228	44.5115	41.0367	74.2036	28.9038	46.3484	93.364	101.841	68.7262	70.0435	66.1434	35.9812	82.5007	43.153	59.8722	49.2958	40.4117	28.9244	37.4512	99.3173	42.1552
AC191748.3_FG001	chr3	216727939	216730851	0	0	0	0	0	0	0	0	0	0	0	0	0	0	0	0	0	0	0	0	0
GRMZM2G033523	chr5	77700110	77701507	0	0	0	0	0	2.16391	0	0	0	0	5.07615	0	0	0	0	0	0	0	0	0	0
GRMZM2G416544	chr2	227932244	227946984	0	0.223277	0	0	0	0	0	0	0	0	0	0	0	0	0	0	0	0	0	0	0
GRMZM2G136752	chr7	125542675	125543848	0	0	0	0	0	0	0	0	0	0	0	0	0	0	0	0	0	0	0	0	0
GRMZM2G365162	chr2	3597792	3599010	16.5971	15.6827	20.7284	7.35235	18.263	18.3413	17.7142	27.5133	16.0747	28.373	21.4341	20.2489	0	11.5031	8.0487	13.1874	11.7751	20.3962	21.0191	15.5005	18.0751
GRMZM2G112951	chr9	80686353	80689863	0	0	34.9523	0	45.2547	0	0	18.7187	0	0	0	0	0	0	0	0	0	0	0	50.4199	5.5609
GRMZM2G082007	chr4	169959940	169963899	111.35	113.664	107.245	97.0318	118.084	138.766	113.723	108.483	198.43	211.466	115.696	99.5541	85.989	134.24	115.887	150.703	93.9279	121.861	136.609	157.392	98.7074
GRMZM2G173989	chr3	211858568	211866122	64.1541	94.2712	82.7873	62.3828	66.2626	58.9727	70.7708	83.5011	76.8118	75.3517	53.7833	53.662	60.1852	70.1271	74.4337	75.8749	63.3032	82.1488	65.6648	74.713	57.6706
GRMZM2G336962	chr2	202729115	202736554	62.6623	62.7784	53.8355	75.8601	70.4934	62.8383	73.5753	61.3903	75.0076	53.5001	77.5322	59.632	53.7709	72.8729	67.8204	61.9688	63.5573	60.648	68.7131	59.7772	66.1501
GRMZM2G407032	chr2	8183674	8185242	0	0	0	0	0	3.20042	0	0	0	0	0	0	0	0	1.44458	0	0	0	0	0	0.310752
GRMZM2G145123	chr10	76504595	76506978	0	2.75312	2.2224	0	4.96744	0	0	1.81014	0	0	0	0	0	0	3.28311	0	2.93045	0	3.79768	0	2.21283
AC203956.3_FG004	chr9	113478807	113484440	5.61866	7.25259	5.39274	7.30388	4.87981	7.24018	11.9821	8.77066	10.4383	3.62763	5.18414	2.01597	6.93489	8.66744	1.65237	5.91713	6.59495	5.44784	5.59988	7.99515	5.71303
GRMZM2G162460	chr9	138759621	138763332	13.2543	18.6623	17.3804	11.2211	33.2613	21.9266	34.8091	12.7986	10.7727	14.7473	26.0316	33.0128	0	12.4575	16.4008	17.3963	20.2044	33.1795	23.3878	16.1555	11.3009
GRMZM2G156638	chr2	11992353	12001215	158.19	173.029	178.178	159.585	153.841	173.753	145.37	189.437	152.967	153.36	172.409	157.724	194.35	212.035	146.901	186.174	155.366	164.628	198.764	129.092	190.455
GRMZM2G369340	chr7	149356355	149364246	95.4503	101.495	98.4567	81.9438	123.209	121.132	98.3462	106.037	119.759	86.6494	123.427	87.3353	80.5259	115.164	107.805	99.3519	85.4659	83.3091	110.145	77.3482	107.798
GRMZM2G449901	chr7	143745805	143746932	0	0	0	0	0	0	0	0	0	0	0	0	0	0	3.13999	0	0	0	0	0	3.35383
GRMZM2G156924	chr5	70079398	70080998	24.7717	22.7096	4.386	0.146803	0	9.69465	0	55.332	6.86073	0	29.8068	31.8267	0	0	15.1712	0	0	49.1206	8.70127	0	0.489792
GRMZM2G482046	chr6	159990951	159992074	12.7112	7.63452	7.89539	5.66888	0	7.75184	10.8295	6.9958	9.17569	0	8.68404	0	0	8.71064	6.28859	5.97674	7.77684	0	11.3046	0	8.47227
GRMZM2G056773	chr4	217688080	217694381	57.9904	68.4726	35.03	55.9494	60.2687	47.4795	33.2769	76.9841	47.2584	49.8372	64.6499	66.8857	61.1617	60.41	60.3711	53.8338	69.5845	40.9941	61.5584	51.5716	51.0678
GRMZM2G050512	chr1	279119396	279122777	9.5804	15.808	11.2076	8.22744	18.2986	9.15838	4.28293	6.76115	4.47101	12.3725	9.07004	10.144	11.0392	4.89335	11.9344	9.77299	8.2892	9.05171	10.8729	6.98938	13.7029
GRMZM2G153648	chr8	174175942	174178361	175.144	134.79	116.887	136.945	82.6063	117.567	156.886	155.783	144.271	114.026	123.121	138.334	93.0484	104.081	109.789	124.767	79.9525	92.2813	113.27	115.648	103.648
GRMZM2G151979	chr2	218363564	218365361	13.1367	7.29795	9.03065	11.6831	11.9039	12.1616	0	12.6229	10.9274	0	12.1409	0	15.0511	0	11.3169	11.672	0	11.9319	10.0035	0	8.91401
GRMZM2G028386	chr1	201957088	201958672	0	0	0	0	0	0	0	0	0	0	0	0	0	0	0	3.5495	0	0	0	0	0
GRMZM2G129288	chr6	150070662	150076557	91.7773	180.409	96.5954	104.72	173.843	95.1529	105.301	113.621	127.49	106.852	40.7526	122.674	135.206	103.667	152.582	110.978	105.028	104.818	131.726	113.088	131.01
GRMZM2G466545	chr4	171917078	171922792	23.2381	42.9531	28.0426	33.3433	19.0399	32.0002	39.8456	31.051	23.6288	29.2625	14.0513	24.756	21.3779	32.0574	28.2808	30.6649	30.5668	32.3907	40.1888	18.8982	44.2193
GRMZM5G843141	chr2	43434581	43441085	38.7734	39.7747	23.3851	35.1117	19.6075	22.0882	22.4174	14.5176	10.7432	19.8644	22.5677	52.0789	15.8899	9.40067	57.4793	19.9018	40.5532	43.1034	18.347	10.9029	25.3334
GRMZM2G304818	chr1	23251952	23253665	0	0	0	0	0	0	0	0	0	0	0	0	0	0	0	0	0	0	0	0	0
GRMZM2G123550	chr5	30600306	30602869	7.00529	4.026	5.61184	4.33022	6.13786	3.35147	0	2.82924	5.18938	5.11021	5.27155	0	0	3.46583	2.51509	4.41313	6.59565	8.18964	6.2378	0	5.08395
GRMZM2G519210	chr1	285074424	285077363	28.6012	39.0055	44.7558	16.4107	34.2428	19.2571	39.9012	27.781	26.29	24.1522	26.989	46.6495	19.7057	23.0095	16.6043	19.7158	29.9686	28.1492	28.2296	27.9796	32.3921
GRMZM2G136765	chr8	138556688	138562724	26.7371	54.1824	27.6332	58.2407	36.1601	41.3945	61.2406	43.8739	46.8835	44.497	52.1687	60.0193	45.7419	50.7636	35.3025	50.151	55.4359	67.2592	71.0598	51.0701	62.1985
GRMZM2G074517	chr3	60570972	60574569	54.4318	86.4527	86.6905	90.748	62.1775	64.6308	48.661	75.9825	90.0467	62.6016	40.8349	67.9224	49.1185	60.819	70.1789	61.6237	46.6662	66.8879	52.9529	73.8874	78.325
GRMZM2G042398	chr1	267004021	267008402	130.529	122.166	115.317	67.0016	65.6113	66.5314	130.72	89.2671	67.7032	96.4651	148.876	72.2961	61.9086	125.667	111.212	143.251	142.075	63.9082	70.1436	121.541	142.586
GRMZM2G331154	chr9	126630633	126643659	33.9041	33.1452	34.0608	32.6579	12.2766	13.0904	25.5518	38.1657	38.5643	49.6209	41.3391	40.7826	23.1683	11.2912	40.8435	40.4307	21.1439	23.2541	17.5843	50.5442	31.3704
GRMZM2G019501	chr3	221618829	221622772	79.2667	79.9948	87.4567	77.6195	72.574	66.874	80.1752	86.4868	70.4267	94.9977	62.9043	69.8474	64.9511	83.8052	69.0847	64.2564	68.0342	65.2752	70.4156	62.1711	74.1163
GRMZM2G144283	chr5	171595549	171597879	0	0	0	0	0	0	0	0	0	0	0	0	0	0	0.175429	0	0	0	0	0	0
GRMZM5G848897	chr4	238639519	238640668	0	0	0	0	0	0	0	0	0	0	0	0	0	0	0	0	0	0	0	0	0
GRMZM2G097728	chr5	191079724	191083805	115.087	175.705	163.053	185.312	179.328	215.98	115.217	157.473	195.322	141.528	152.995	120.16	155.167	203.704	196.219	132.166	111.289	163.701	193.87	105.745	164.48
GRMZM2G006069	chr4	239686592	239692358	32.8359	26.0495	31.455	44.1182	34.5728	35.9199	29.5263	30.3232	41.1834	39.9833	37.4173	36.2903	23.7598	30.2308	25.8576	34.6191	24.6186	18.317	25.6166	27.4303	41.7057
AC196789.3_FG001	chr1	31048532	31050042	0	0	0	0	0	0	0	0	0	0	0	0	0	0	0	0	0	0	0	0	0
GRMZM2G171622	chr3	158974014	158978367	94.2465	95.4655	78.6216	86.7104	71.6675	83.3622	61.193	79.9809	69.9304	84.1217	77.1217	77.6546	71.2671	63.6859	76.025	83.9291	86.6027	101.393	76.0136	86.2936	101.797
GRMZM2G496991	chr1	17624742	17625481	0	0	0	0	0	0	0	0	0	0	0	0	0	0	0	0	0	0	0	0	0
AC200753.3_FG003	chr7	7459648	7462861	7.92273	10.3729	16.3269	16.1169	7.51745	7.13894	12.7332	26.3102	24.0938	22.868	9.9563	11.8271	12.916	9.96909	6.27703	22.1986	6.9009	19.3185	13.6698	18.6191	37.3386
GRMZM2G309269	chr1	202226325	202227433	73.5659	84.0569	72.9472	74.4268	77.9979	71.2977	78.0691	94.4136	64.9739	54.0274	48.48	34.9704	66.15	49.2733	50.2876	70.3761	52.9478	48.0216	61.3285	82.2242	65.9991
GRMZM2G438045	chr3	167016083	167016317	0	0	0	0	0	0	0	0	0	0	0	0	0	0	0	0	0	0	0	0	0
GRMZM2G097983	chr9	53404510	53406630	0	0.82236	1.9437	0	0	0	0	0	0.881235	0	0	0	0	0	1.61067	0	2.66112	0	0	2.59835	2.38964
GRMZM2G123128	chr1	264168042	264172500	36.0586	47.497	32.8738	35.2893	69.4834	73.8007	45.4587	44.0927	38.4786	35.9319	43.1675	26.4763	27.6784	35.9522	49.7108	55.6075	21.6286	56.4516	64.391	38.6113	58.0641
GRMZM2G163396	chr4	129616513	129619735	5.34366	7.30652	6.72367	8.04059	7.21211	9.94724	7.69681	8.64658	9.28429	5.83629	4.4421	7.11262	8.02273	8.8977	7.14553	7.34037	5.78223	7.22617	7.02054	4.59353	10.2805
GRMZM2G481964	chr7	130317794	130318895	0	0	0	0	0	0	0	0	0	0	0	0	0	0	0	0	0	0	0	0	0
GRMZM2G527472	chr3	181173354	181173896	0	0	0	20.3242	0	0	0	0	0	0	15.6461	0	0	0	22.6276	17.3362	31.0257	0	0	0	26.8432
GRMZM2G147243	chr6	133196855	133200588	1285.29	1206.48	1176.06	1406.84	950.865	1130.09	1088.69	1343.41	1020.44	1058.64	1102.88	1367.32	1256.5	1582.49	1244.74	1330.49	1416.2	1049.97	1482.63	1158.32	1214.77
GRMZM2G127067	chr1	86158353	86166764	170.418	205.139	213.419	192.592	199.756	209.295	286.995	200.122	227.024	180.165	156.233	163.719	234.123	181.922	232.19	197.699	210.868	191.29	195.947	175.197	176.983
GRMZM2G114998	chr4	155008617	155010960	82.9748	82.8648	68.4598	71.7327	54.3683	65.4235	85.1648	70.7893	95.6486	65.1878	98.4824	76.5009	67.1178	71.1543	82.9007	63.5268	114.653	76.5156	90.8036	69.818	108.717
AC205502.4_FG004	chr1	59467406	59469906	0	2.12036	2.80403	1.5987	3.52626	0	2.66704	0.356227	1.24276	0	0.559037	0	0	3.24289	7.44081	0.248737	0	0	2.20796	0	0
GRMZM2G454511	chr2	7941242	7945500	3.86857	0	7.42627	0	7.28003	0	0	2.13996	4.11282	0	0	0	0	0	0	0	0	2.95749	3.53409	0	0
GRMZM5G876146	chr1	298734444	298737448	79.3213	59.2775	60.5452	65.3911	54.8254	67.6173	86.4547	62.9421	92.2182	106.646	113.81	151.049	62.4667	66.1281	79.9708	104.843	117.776	63.961	69.1081	123.634	86.1979
GRMZM2G080937	chr8	7977137	7982139	258.542	331.942	277.485	336.455	261.797	272.217	326.647	322.037	281.079	326.303	309.367	185.329	273.036	264.116	273.943	333.95	326.418	289.998	284.754	324.215	327.29
GRMZM2G127714	chr2	203058549	203064554	0	9.75442	9.51826	5.1079	0	5.26693	14.0916	12.4822	9.25846	0	0	10.3401	0	9.21825	6.44365	0	0	0	5.71505	20.1449	2.0313
GRMZM2G303728	chr4	74919779	74922214	2.85038	12.5022	8.32058	0.915536	6.24992	4.4046	7.37773	3.39344	1.8125	3.32192	2.46165	7.1681	0	8.41735	9.59104	3.87944	0	1.72879	4.27663	2.35013	7.78581
GRMZM2G142834	chr2	102792792	102793500	255.317	178.145	157.341	144.27	112.603	173.017	312.25	217.214	167.353	205.312	266.284	300.795	58.9463	180.696	122.495	133.405	244.571	98.6293	120.864	496.782	159.666
AC197697.3_FG001	chr2	76361429	76362131	0	0	0	0	0	0	0	0	0	0	0	0	0	0	0	0	0	0	0	0	0
GRMZM2G369445	chr2	222647755	222648525	12.4183	18.3304	6.2109	7.12312	0	9.04592	0	18.664	9.94763	10.1744	0	0	0	17.1693	11.9502	7.30342	13.4317	20.9046	14.1513	0	13.7579
GRMZM2G032304	chr3	139180224	139181698	0	0	0	14.337	21.3802	0	11.5426	1.76608	0	0	0	0	0	0	0	0	0	0	0	0	0
GRMZM2G028054	chr8	171172056	171175888	16.0991	9.37044	19.4892	3.38649	21.0403	11.5399	51.3356	12.9343	32.8654	0	40.9056	0	7.37227	26.7988	26.4594	28.1362	23.4386	11.6107	6.0273	5.5537	4.94805
GRMZM2G132519	chr3	9705159	9707788	135.202	138.725	142.246	154.861	126.578	139.419	69.0908	154.7	142.236	124.294	129.664	163.277	132.373	135.983	128.888	146.241	135.247	108.689	132.9	140.198	170.729
GRMZM2G138355	chr10	112203219	112206566	32.0718	47.1124	61.3593	32.4728	44.7061	18.9442	21.7814	41.8552	17.161	39.5037	24.6323	23.6484	41.7014	19.7858	35.6992	27.753	31.833	28.0138	55.362	35.2459	31.3713
GRMZM2G439422	chr4	182611472	182613026	0	3.23014	2.78016	0	5.13506	3.743	7.76419	3.98409	3.4158	7.44313	0	0	0	3.31495	3.20782	0	3.88848	0	4.79289	0	6.95009
GRMZM2G173649	chr10	124320398	124326366	130.194	127.315	126.683	101.514	149.968	119.435	110.229	119.057	101.539	85.9227	78.8518	123.36	149.301	104.479	108.577	124.108	102.118	86.8633	110.497	111.371	92.0467
GRMZM2G427937	chr7	168806884	168808961	165.638	80.9768	159.931	91.4927	14.8733	42.06	87.2597	94.1645	23.3758	30.2739	38.4513	37.6435	26.3399	39.0438	31.416	88.2837	31.1064	20.3196	52.0898	45.7003	64.6299
[truncated: 37,458 more rows]
